# Supplementary material for: Genetic polymorphism of the Dab2 gene and its association with Type 2 Diabetes Mellitus in the Chinese Uyghur population
Source: PeerJ. 2023 Jun 21;11:e15536. doi: 10.7717/peerj.15536 (PMC10290452; doi:10.7717/peerj.15536)
Supplement: Supplemental Information 1 [file peerj-11-15536-s001.xlsx]

## Sheet: Dab2 primary data
Inpatient number	number	name	ethnic	sex	age	height	weight	BMI	glucose	Glycosylated hemoglobin	TG	TC	HDLC	LDLC	lipoprotein(a)	BUN	creatinine(Cr)	uric acid	systolic pressure	diastolic pressure	Apolipoprotein AI	Apolipoprotein B	degree of education	occupation	Tel	Date of admission	Admission department	Bed No.	address	Abdominal circumference	blood type	pulse	WBC	@NE	LY	MO	EO	BA	@NE_A	LY_A	MO_A	EO_A	BA_A	RBC	HB	HCT	MCV	MCH	MCHC
xxxxxxx	10357	xxx	Han	woman	66	165	75	27.5482	6.39	5.43	1.09	5.3	1.7	3.07	181.9	5.2	85	359	150	90	1.58	0.99	middle school	retire	xxxxxxxxxxx	2016-06-10	Heart center	4	xxxxxx	110		78	10.7	69.3	24.5	4.9	1.2	0.1	7.42	2.62	0.52	0.13	0.01	4.96	153	0.47	93.8	30.9	329
xxxxxxx	6552	xxx	Uygur	woman	51	158	69	27.6398	19.07	9.17	2.7	5.95	0.68	4.03	261	7.1	73	319	180	100	1	1.45	Secondary specialized school	family members	xxxxxxxxxxx	2016-02-08	Heart center	28	xxxxxx	105	O	76	7.8	54.2	34.7	8.1	2.3	0.7	4.23	2.71	0.63	0.18	0.05	5.03	137	0.43	84.5	27.2	322
xxxxxxx	7978	xxx	Uygur	woman	65	160	74	28.9062	6.73	4.8	1.17	2.28	0.1	1.72	4.1	3.56	44.6	143.1	200	120	0.45	0.5	illiterate	farmer	xxxxxxxxxxx	2016-07-12	Heart center	27	xxxxxx	86		90	7.05	76.94	15.74	7.04	0.1	0.3	5.42	1.11	0.5	0.01	0.02	4.14	112	0.34	82.4	27.1	328
xxxxxxx	7905	xxx	Uygur	man	60	165	93	34.1598	5.77	4.9	1.44	3.98	0.81	2.94	171	5.52	74.22	378.17	180	110	1.07	0.9	Secondary specialized school	teacher	xxxxxxxxxxx	2016-07-12	Heart center	24	xxxxxx			79	7.2	54.6	34.2	8.3	2.7	0.2	3.93	2.46	0.6	0.19	0.01	4.27	139	0.41	96.4	32.6	338
xxxxxxx	8015	xxx	Uygur	man	70	167	60	21.5139	5.36	5.3	7.06	3.7	0.88	2.38	62	8.8	49	312			7.3	0.53	middle school	retire	xxxxxxxxxxx	2016-08-09	Heart center	2	xxxxxx	83.4		74	7.83	64	25.5	8.9	1.3	0.3	5.01	2	0.7	0.1	0.02	4.72	138	0.44	92.4	29.2	317
xxxxxxx	8107	xxx	Uygur	man	70	165	85	31.2213	3.9	5.16	2.13	4.24	0.79	2.75	88	4.7	98	384	160	80	0.97	1.52	undergraduate college	retire	xxxxxxxxxxx	2016-08-18	Heart center	18	xxxxxx	95		71	9.9	67.4	23	6.5	3	0.1	6.67	2.28	0.64	0.3	0.01	4.74	141	0.43	91.5	29.8	325
xxxxxxx	8187	xxx	Uygur	man	35	178	115	36.2959	5.13	5.07	1.44	4.28	1.1	2.7	499	6.35	63.09	384.15	160	90	1.22	0.78	Junior college		xxxxxxxxxxx	2016-09-18	Heart center	2	xxxxxx	115	A	88	10	63.9	20.9	8.8	5.9	0.5	6.39	2.09	0.88	0.59	0.05	5.02	141	0.41	82	28	342
xxxxxxx	8121	xxx	Uygur	man	66	180	80	24.6914	6.03	5.75	0.96	2.76	0.68	1.73	137.9	4	93	313	180	100	0.74	0.53	middle school	retire	xxxxxxxxxxx	2016-10-12	Heart center	23	xxxxxx	105		84	6.7	63.3	26.6	7.7	1.2	1.2	4.24	1.78	0.52	0.08	0.08	4.07	120	0.36	87.7	29.5	336
xxxxxxx	9062	xxx	Uygur	man	58	189	86	24.0755	5.89	5.1	0.64	2.71	1.15	1.34		2.77	60	121.6					Secondary specialized school	farmer	xxxxxxxxxxx	2016-11-15	Heart center	16	xxxxxx	110		60	4.04	47.1	41.3	8.9	2.2	0.5	1.9	1.67	0.36	0.09	0.02	4.23	124	0.4	94.1	29.3	312
xxxxxxx	9213	xxx	Uygur	man	43	165	94	34.5271	4.5	4.7	1.3	3.12	0.85	1.78	32.9	4.06	72.8	297.37	120	70	1.91	0.63	middle school	retire	xxxxxxxxxxx	2017-01-16	Heart center	13	xxxxxx			75	7.8	65	27.1	7.2	0.6	0.1	5.07	2.11	0.56	0.05	0.01	4.51	148	0.45	99.1	32.8	332
xxxxxxx	6958	xxx	Uygur	woman	63	165	83	30.4867		6.48		3.5	6.19	1.13	28	12.12	3.92	8.2	170	110	12	5.04	middle school	farmer	xxxxxxxxxxx	2017-03-16	Heart center	21	xxxxxx			88	6.6	59.1	32.5	6.8	1.2	0.4	3.9	2.14	0.45	0.08	0.03	4.73	143	0.43	90.6	30.1	332
xxxxxxx	6943	xxx	Uygur	woman	64	165	57	20.9366	6.04	5.1	2.63	3.19	0.47	1.65	135	7.9	80	318	200	140	0.93	0.85	Secondary specialized school	farmer	xxxxxxxxxxx	2017-03-17	Heart center	29	xxxxxx			80	11.1	67.8	23.6	3.8	4.4	0.4	7.95	2.76	0.44	0.51	0.05	3.88	115	0.34	86.7	29.7	343
xxxxxxx	6954	xxx	Uygur	man	48	170	92	31.8339	7.52	8.37	2.17	4.58	0.97	3.13	510	5.47	64.65	426	150	80	1.08	0.85	Secondary specialized school	herdsman	xxxxxxxxxxx	2017-03-18	Heart center	22	xxxxxx	130		84	9.5	68.3	22.9	7.6	0.7	0.5	6.49	2.18	0.72	0.07	0.05	5.36	162	0.49	91.6	30.3	331
xxxxxxx	6999	xxx	Uygur	man	57	165	70	25.7117	4.63	5.1	1.97	3.8	0.4	2.21	32	5.4	75	364	160	110	72	0.91			xxxxxxxxxxx	2017-03-24	Heart center	38	xxxxxx			58	6.26	57.5	30.8	8.5	3	0.2	3.6	1.93	0.53	0.19	0.01	5.36	162	0.49	90.5	30.2	334
xxxxxxx	7121	xxx	Uygur	woman	58	160	80	31.25	8.09	7.62	2.21	4.56	1.11	2.96	249	6.38	53.74	233.15	110	80	1.22	0.82	Secondary specialized school	wait for employment	xxxxxxxxxxx	2017-04-08	Heart center	10	xxxxxx	115		75	4.9	44.3	38.5	13.3	3.2	0.7	2.17	1.89	0.65	0.16	0.03	4.98	126	0.89	35.8	28.1	328
xxxxxxx	7393	xxx	Uygur	woman	72	160	82	32.0312	4.46	4.7	3.19	3.23	0.66	1.58	15.65	5.75	64.8	324.1	150	100	0.91	0.48			xxxxxxxxxxx	2017-05-17	Heart center	42	xxxxxx	110	A	76	8.12	67.44	24.34	7.44	0.7	0.2	5.48	1.98	0.6	0.06	0.02	4.83	133	0.41	84.9	27.5	324
xxxxxxx	10869	xxx	Uygur	woman	57	160	83	32.4219	4.52	5.47	0.99	4.16	1.75	1.96	43.3	6.2	68	167			1.47	0.75	middle school	farmer	xxxxxxxxxxx	2017-06-04	Heart center	19	xxxxxx		AB	90	6.9	54.7	33.2	10.8	1.2	0.1	3.77	2.29	0.75	0.08	0.01	4.6	139	0.43	93.5	30.3	324
xxxxxxx	7542	xxx	Uygur	woman	69	160	71	27.7344	8.18	6.87	1.54	4.15	0.79	2.95	48.1	5.12	62.5	345.8	170	100	0.83	0.6	middle school	retire	xxxxxxxxxxx	2017-06-22	Heart center	14	xxxxxx	106	B	83	6.98	63	27.8	6.2	2.7	0.3	4.4	1.94	0.43	0.19	0.02	4.3	120	0.37	86	27.9	324
xxxxxxx	11100	xxx	Han	man	58	178	80	25.2493	4.21	5.23	2.31	4.45	0.69	2.74	92.1	4	88	371	120	80	0.74	0.97	Secondary specialized school	retire	xxxxxxxxxxx	2017-06-25	Heart center	13	xxxxxx	90	O	80	6.6	64	28.5	7	0.4	0.1	4.22	1.88	0.46	0.03	0.01	4.62	144	0.44	94.9	31.2	329
xxxxxxx	7700	xxx	Uygur	woman	61	160	74	28.9062	7.38	7.97	1.57	3.88	1.04	2.24		6.6	68	377			1.74	0.87	Junior college	retire	xxxxxxxxxxx	2017-08-08	Heart center	27	xxxxxx	90	B	76	5.6	48.6	41.6	7.7	1.6	0.5	2.72	2.33	0.43	0.09	0.03	4.14	125	0.32	89.1	30.1	338
xxxxxxx	7778	xxx	Uygur	woman	55	165	70	25.7117	10.8	10.79	27.1	21.1	20.55	3.1		10.4	110	97	200	150	21.3		Secondary specialized school	retire	xxxxxxxxxxx	2017-08-09	Heart center	4	xxxxxx			58	11.5	66.4	24.8	6.8	1.9	0.1	7.64	2.85	0.78	0.22	0.01	4.44	138	0.4	90.4	31.1	344
xxxxxxx	7727	xxx	Uygur	woman	60	160	60	23.4375	9.24	7.77	1.3	3.37	1.06	2.12	9.4	4.55	46.05	210.33			1.14	0.59		wait for employment	xxxxxxxxxxx	2017-08-10	Heart center	27	xxxxxx	87		80	3.7	63.7	26.9	8.1	1.1	0.2	4.9	2.07	0.62	0.08	0.02	4.22	132	0.38	90.2	31.3	347
xxxxxxx	7747	xxx	Uygur	woman	66	162	60	22.8624	6.31	5.2	2.81	3.98	0.64	2.31	10.1	8.43	80.8	498.2	133	97	1.03	0.96	Secondary specialized school	retire	xxxxxxxxxxx	2017-08-10	Heart center	14	xxxxxx	80		60	7.14	57.54	32.84	7.34	2.04	0.44	4.11	2.34	0.52	0.15	0.03	4.66	132	0.4	86.7	28.3	327
xxxxxxx	7785	xxx	Uygur	man	59	172	75	25.3515	4.86	5.29	3.5	5.7	1.16	3.11	125	5.37	95.31	379	180	110	1.21	1.1	Junior college	cadre	xxxxxxxxxxx	2017-08-16	Heart center	18	xxxxxx	98		74	5.4	54.9	32.3	10.4	2.2	0.2	2.96	1.74	0.56	0.12	0.01	4.73	139	0.41	86.8	29.4	339
xxxxxxx	7810	xxx	Uygur	man	37	155	70	29.1363	4.85	4.9	2.08	3.89	0.61	2.31	7	6.2	71	366			0.87	0.89	Junior college	teacher	xxxxxxxxxxx	2017-08-20	Heart center	29	xxxxxx	90	A	90	5.8	64.6	26	7.2	0.9	1.3	3.75	1.51	0.42	0.05	0.08	4.53	137	0.42	93.5	30.2	323
xxxxxxx	7823	xxx	Uygur	woman	40	165	59	21.6713	5.24	4.88	1.41	5.28	1.25	3.65	26	3.6	54.52	147.55	110	70	1.29	1.01	middle school	worker	xxxxxxxxxxx	2017-08-21	Heart center	12	xxxxxx			88	6.3	54.8	29.5	13	1.8	0.9	3.45	1.86	0.85	0.11	0.06	4.5	134	0.4	88.8	29.8	335
xxxxxxx	7885	xxx	Uygur	woman	54	159	55	21.7555	5.23	4.96	1.11	3.03	0.99	1.77	9.14	5.3	61.63	168.47	100	60	1.11	0.55	Secondary specialized school	farmer	xxxxxxxxxxx	2017-08-29	Heart center	16	xxxxxx			80	5.1	63	25.3	9.3	2	0.4	3.21	1.29	0.47	0.1	0.02	4.13	122	0.37	89	29.5	332
xxxxxxx	8229	xxx	Uygur	man	44	165	80	29.3848	4.72	5.16	2.96	4.72	0.9	2.97	51	6.1	65.59	427.86	180	120	1.21	0.82		cadre	xxxxxxxxxxx	2017-10-10	Heart center	21	xxxxxx	103	B	67	7.3	52.8	39	7	0.9	0.3	3.85	2.85	0.51	0.07	0.02	5.49	167	0.5	90.6	30.4	336
xxxxxxx	8295	xxx	Uygur	woman	68	165	70	25.7117	7.57	7.07	2.57	3.92	0.45	2.87	50.1	5.58	53.3	290.2	150	100	0.69	0.45	illiterate		xxxxxxxxxxx	2017-10-18	Heart center	24	xxxxxx				5.71	50.74	38.24	7.74	3.04	0.44	2.9	2.18	0.44	0.17	0.03	4.19	115	0.37	87.6	27.4	313
xxxxxxx	8346	xxx	Uygur	man	42	169	70	24.5089	5.35	5.57	2.68	6.68	0.75	4.79	85.3	4	68	354			0.97	1.39	Junior college	cadre	xxxxxxxxxxx	2017-10-23	Heart center	20	xxxxxx	88	O	72	5.3	69.8	21.4	8	0.7	0.1	3.7	1.13	0.42	0.04	0.01	4.08	130	0.39	94.6	31.9	337
xxxxxxx	8555	xxx	Uygur	man	75	178	65	20.5151	6.64	5.84	0.65	2.61	0.74	1.81	41.1	7.1	77	384			0.74	0.55	Secondary specialized school	retire	xxxxxxxxxxx	2017-11-09	Heart center	26	xxxxxx	95	B	75	9.1	64	25.4	7.4	2.5	0.7	5.82	2.31	0.67	0.23	0.06	3.87	122	0.35	91	31.6	347
xxxxxxx	8747	xxx	Uygur	man	66	173	88	29.4029	5.87	5.26	1.69	3.52	0.67	2.58	48.8	4.9	70	354	140	80	0.83	0.75	Secondary specialized school	farmer	xxxxxxxxxxx	2017-11-28	Heart center	16	xxxxxx	103	O	88	7.6	56.8	33.2	7.2	2.1	0.7	4.32	2.52	0.55	0.16	0.05	7.96	132	0.38	96.1	33.3	347
xxxxxxx	9111	xxx	Uygur	man	66	163	76	28.6048	5.06	5.4	1.33	3.25	0.73	1.98	27	6	104	338	150	90	0.84	0.7	middle school	retire	xxxxxxxxxxx	2017-12-19	Heart center	24	xxxxxx	102	A	80	6.5	45.1	41	12	1.8	0.1	2.93	2.66	0.78	0.12	0.01	4.9	129	0.4	82.5	26.2	318
xxxxxxx	9126	xxx	Uygur	man	54	173	77	25.7276	7.28	7.17	1.8	3.36	0.64	1.92	108	5.16	101.5	381.38	148	76	0.95	0.71	undergraduate college		xxxxxxxxxxx	2017-12-26	Heart center	13	xxxxxx	103	O	88	7.4	68.1	23	7.2	1.4	0.3	5.04	1.7	0.53	0.1	0.02	4.91	138	0.43	88.4	28.1	318
xxxxxxx	9117	xxx	Uygur	man	61	170	70	24.2215	5.69	4.7	2.63	4.15	0.62	2.53	80.4	3.81	71.1	264.69	110	70	1.59	0.77	middle school	staff	xxxxxxxxxxx	2017-12-28	Heart center	12	xxxxxx	105	A	78	8.7	65.2	20.6	13.1	0.9	0.2	5.67	1.79	1.14	0.08	0.02	5.18	155	0.47	90.5	29.9	330
xxxxxxx	9154	xxx	Uygur	man	57	168	84	29.7619	5.09	4.67	0.72	4.99	1.32	3.03	156	10.58	69.18	233.22	180	110	1.2	0.85	Secondary specialized school	worker	xxxxxxxxxxx	2017-12-30	Heart center	16	xxxxxx	90	AB	84	7.7	67.9	22	7.6	2.4	0.1	5.23	1.69	0.59	0.18	0.01	5.14	159	0.46	90	31	345
xxxxxxx	9168	xxx	Uygur	man	48	172	81	27.3797	4.68	5.76	0.75	3.36	0.85	1.98	116	5.82	78	349	110	80			Junior college	cadre	xxxxxxxxxxx	2017-12-30	Heart center	11	xxxxxx	105	AB	80	5.5	66.1	24.8	6.7	2.4	0	3.64	1.36	0.37	0.13	0	4.43	140	0.41	92.6	31.6	342
xxxxxxx	9162	xxx	Uygur	man	59	172	85	28.7317	4.35	5	1.79	2.64	0.56	1.45	166.2	2.35	56	256.05			0.97	0.55	Secondary specialized school	farmer	xxxxxxxxxxx	2017-12-30	Heart center	18	xxxxxx	100	O	80	4.8	54.9	36.3	7.4	1.4	0	2.64	1.74	0.36	0.07	0	3.78	131	0.38	99	34	343
xxxxxxx	9179	xxx	Uygur	man	64	176	74	23.8895	7.79	7.47	0.94	2.5	0.64	1.53	228.2	5	86	330	120	80	0.81	0.55	Secondary specialized school	retire	xxxxxxxxxxx	2018-01-04	Heart center	19	xxxxxx	97	O	72	7.9	55.4	32.6	9.1	2.8	0.1	4.38	2.58	0.72	0.22	0.01	4.61	145	0.45	97.9	31.5	322
xxxxxxx	9272	xxx	Uygur	man	42	180	78	24.0741	5.07	5	0.99	3.91	1.06	2.55	57	6.33	76.19	293.02	120	80	1.11	0.62	Junior college	driver	xxxxxxxxxxx	2018-01-06	Heart center	5	xxxxxx	85		48
xxxxxxx	9234	xxx	Uygur	woman	60	165	62	22.7732	5.9	5.73	2.87	5.39	0.86	3.25	721	5.75	46.3	311.64	170	93	1.09	1.14	Junior college		xxxxxxxxxxx	2018-01-08	Heart center	47	xxxxxx	90	O	81	5.7	54.1	33.7	9.5	2.1	0.6	3.08	1.92	0.54	0.12	0.03	3.6	107	0.33	91	29.9	328
xxxxxxx	9329	xxx	Uygur	man	56	165	84	30.854	5.11	5.2	0.85	3.68	1.12	2.18	257.4	4.1	63	343	120	80	1.04	2.66	undergraduate college	teacher	xxxxxxxxxxx	2018-01-10	Heart center	33	xxxxxx			84	8.6	69	19.8	8.9	2	0.3	5.93	1.7	0.77	0.03	4.25	129	0.39	92.3	70.3	328	13.3
xxxxxxx	9313	xxx	Uygur	man	62	175	85	27.7551	5.07	5.32	0.92	4.53	0.92	3.12	53.9	8.2	102	379			0.95	0.87	undergraduate college	cadre	xxxxxxxxxxx	2018-01-10	Heart center	190014	xxxxxx	103	A	76	8	61.9	30	6.3	1.1	0.7	4.95	2.4	0.5	0.09	0.06	4.59	142	0.42	91.8	30.9	337
xxxxxxx	9338	xxx	Uygur	man	57	165	72	26.4463	3.38	4.5	2.1	4.01	0.69	2.71	491.5	3.94	74	338.97			1.11	0.94	Junior college	cadre	xxxxxxxxxxx	2018-01-11	Heart center	8	xxxxxx	100	B	73	6.91	47	36.5	14.21	2	0.3	3.25	2.52	0.98	0.14	0.02	5.48	160	0.47	86.1	29.2	339
xxxxxxx	9359	xxx	Uygur	man	67	178	94	29.668	6.5	5.3	1.3	3.01	0.89	1.74	13	7.5	102	530			1.06	0.63	Junior college	retire	xxxxxxxxxxx	2018-01-16	Heart center	1	xxxxxx	105		76	5.3	60.9	28.4	5.9	4.8	0	3.23	1.51	0.31	0.25	0	4.35	130	0.39	88.5	29.9	338
xxxxxxx	9373	xxx	Uygur	man	70	172	88	29.7458		5.07	1.1	2.69	1.12	1.27					180	110			Secondary specialized school	retire	xxxxxxxxxxx	2018-01-17	Heart center	29	xxxxxx	115	O	88	7.7	57.7	30.6	8.8	2.8	0.1	4.44	2.36	0.68	0.22	0.01	4.34	134	0.41	94.3	30.9	338
xxxxxxx	9370	xxx	Uygur	man	60	165	70	25.7117	5.01	5.3	3.37	3.24	0.66	1.34	357	3.7	35.6	220.26	130	90	1.52	0.64	middle school		xxxxxxxxxxx	2018-01-19	Heart center	21	xxxxxx			78	7.5	57.6	32.2	6.3	3.5	0.4	4.32	2.41	0.47	0.26	0.03	4.64	130	0.41	130	0.41	87.4
xxxxxxx	9386	xxx	Uygur	man	68	175	91	29.7143	4.17	5.71	1.2	4.66	1.45	2.31	70	5.67	83.77	403.66	190	100	1.3	0.77	Junior college	retire	xxxxxxxxxxx	2018-01-29	Heart center	31	xxxxxx	105	O	61	6.4	64	23.7	7.6	4.6	0.1	4.1	1.52	0.49	0.29	0.01	4.25	130	0.39	90.9	30.7	338
xxxxxxx	9403	xxx	Uygur	man	65	170	70	24.2215	4.79	5.21	0.76	3.86	1.44	2.31	381	4.9	74	275	180	90	1.24	0.74	Secondary specialized school	farmer	xxxxxxxxxxx	2018-01-29	Heart center	10	xxxxxx	89	O	84	5.28	56.3	30.3	12.1	1.1	0.2	2.97	1.6	0.64	0.06	0.01	4.47	133	0.42	93.1	29.8	320
xxxxxxx	9380	xxx	Uygur	woman	72	160	58	22.6562	5.48	4.9	0.82	4.02	0.91	2.65	220.1	2.91	70.9	131.08	115	75	1.45	0.86	Secondary specialized school	farmer	xxxxxxxxxxx	2018-01-30	Heart center	3	xxxxxx	70	AB	71	7.69	68	18.6	11.7	1.4	0.3	5.23	1.43	0.9	0.11	0.02	3.68	104	0.33	89.7	28.3	315
xxxxxxx	9385	xxx	Uygur	man	64	175	95	31.0204	6.64	4.6	1.66	3.41	0.87	1.88	198	7.2	59.7	241.1	130	80	1.38	0.68	Secondary specialized school		xxxxxxxxxxx	2018-01-30	Heart center	30	xxxxxx	105	AB	57	5.26	56.3	30.4	9.1	3.6	0.6	2.96	1.6	0.48	0.19	0.03	4.01	126	0.38	95.5	31.4	329
xxxxxxx	9406	xxx	Uygur	man	49	170	75	25.9516	3.95	4.99	1.09	5.02	1.01	3.83	80.1	4.6	85	385			1.09	1.06	middle school	farmer	xxxxxxxxxxx	2018-01-30	Heart center	31	xxxxxx	98	AB	70	11	58.5	32.4	4.8	4.2	0.1	6.43	3.56	0.53	0.46	0.01	4.69	150	0.44	93.9	32.1	342
xxxxxxx	9642	xxx	Uygur	man	44	172	90	30.4218	11.88	7.77	1.03	3.19	1.12	1.55	150	3.14	79.8	196.27			1.4	0.6	Secondary specialized school		xxxxxxxxxxx	2018-02-08	Heart center	10	xxxxxx	113	AB	98	7.17	57.3	31	8.4	3.2	0.1	4.11	2.22	0.6	0.23	0.01	4.6	138	0.43	93.3	30	322
xxxxxxx	9598	xxx	Han	man	58	170	66	22.8374	4.97	5.11	2.18	4.11	1.15	2.12	194.1								middle school	farmer	xxxxxxxxxxx	2018-02-13	Heart center	43	xxxxxx	90		78	5.8	53.2	29.7	6.9	8.8	1.4	3.09	1.72	0.4	0.51	0.08	4.43	141	0.42	94.8	31.8	336
xxxxxxx	9609	xxx	Uygur	man	69	186	66	19.0773	4.45	5.01	0.87	3.67	1.08	2.19	135	6.01	88.28	252.11			1.25	0.63		cadre	xxxxxxxxxxx	2018-02-13	Heart center	34	xxxxxx	74	B	72	7.79	46.5	41	8.3	3.8	0.4	3.71	3.27	0.66	0.3	0.03	3.82	118	0.37	95.8	30.9	322
xxxxxxx	10775	xxx	Han	woman	67	165	70	25.7117	4.96	4.6	0.82	3.81	0.78	2.42	226.9	7.95	56.5	219.68	127	77	1.55	0.81	middle school	retire	xxxxxxxxxxx	2018-02-17	Heart center	14	xxxxxx			82	6	57.8	27.8	9.5	4	0.9	3.47	1.67	0.57	0.24	0.05	4.13	135	0.39	92.6	31.9	344
xxxxxxx	9730	xxx	Uygur	man	47	170	85	29.4118	5.98	4.4	1.61	4.08	0.87	2.38	7	4.31	72	255			1.05	0.68		farmer	xxxxxxxxxxx	2018-02-17	Heart center	23	xxxxxx	90		80	11.9	79.9	15.5	4.5	0	0.1	9.5	1.84	0.54	0	0.01	5.09	160	0.48	94.9	31.5	332
xxxxxxx	9652	xxx	Uygur	man	41	176	77	24.858	6.79	4.03	1.27	3.31	0.75	1.9	152	5.79	86.16	295.39	170	110	0.97	0.61	middle school		xxxxxxxxxxx	2018-02-17	Heart center	13	xxxxxx	95	A	62	7.9	37.3	44.9	11.2	6.1	0.5	2.95	3.55	0.88	0.48	0.04	4.31	143	0.42	95	33.2	339
xxxxxxx	9728	xxx	Uygur	man	49	168	87	30.8248	5.14	5.53	3.49	4.88	0.74	2.64	17.1	7.99	79.29	302.18	150	100	1.02	0.87	Secondary specialized school		xxxxxxxxxxx	2018-02-20	Heart center	31	xxxxxx	105		74	6.4	64.3	26.2	7.1	2.2	0.2	4.12	1.68	0.45	0.14	0.01	4.79	145	0.44	91.9	30.2	329
xxxxxxx	9709	xxx	Uygur	man	53	170	80	27.6817		5.36	4.55	4.04	3.3	1.08									Junior college	teacher	xxxxxxxxxxx	2018-02-21	Heart center	29	xxxxxx	120		72	9.2	54.3	36.8	7	1.9	0	5	3.39	0.64	0.17	0	4.52	145	0.44	97.8	32.1	328
xxxxxxx	9802	xxx	Uygur	man	44	165	75	27.5482	5.25	5.28	2.41	2.81	0.59	1.58	222.7	4.3	71	316			0.82	0.59	middle school	worker	xxxxxxxxxxx	2018-02-26	Heart center	29	xxxxxx	85		82	7.4	55.3	35	6.4	3.2	0.1	4.09	2.59	0.47	0.24	0.01	4.94	150	0.45	91.2	30.3	333
xxxxxxx	9805	xxx	Uygur	woman	46	160	67	26.1719	4.7	5.07	1.45	3.74	0.89	2.31	68	4.68	56.14	280.77	160	110	0.98	0.61		cadre	xxxxxxxxxxx	2018-02-27	Heart center	2	xxxxxx	83		80	8.7	51.3	38.9	7.6	1.9	0.3	4.46	3.38	0.66	0.17	0.03	4.41	133	0.4	90.3	30.1	333
xxxxxxx	9793	xxx	Uygur	man	51	165	72	26.4463	11.57	7.17	1.4	2.89	0.69	1.58	22.8	5.98	63.8	242.6	180	110	1.38	0.6	Secondary specialized school	driver	xxxxxxxxxxx	2018-02-27	Heart center	10	xxxxxx			76	7.67	79.3	12.5	6.8	1.3	0.1	6.08	0.96	0.52	0.1	0.01	4.55	138	0.42	92.1	30.3	329
xxxxxxx	9804	xxx	Uygur	man	37	165	72	26.4463	7.89	7.27	1.41	3.9	0.98	2.2	10	3.95	55.2	207.16			1.77	0.78	middle school	staff	xxxxxxxxxxx	2018-02-28	Heart center	36	xxxxxx	87		102	5.67	67.7	23.5	5.8	2.6	0.4	3.84	1.33	0.33	0.15	0.02	5.24	157	0.49	92.9	30	322
xxxxxxx	9917	xxx	Uygur	man	69	172	72	24.3375	4.9	4.7	2.02	2.34	0.68	0.93	45.9	5.29	90.4	309.54	150	110	1.44	0.46	Junior college	retire	xxxxxxxxxxx	2018-02-28	Heart center	38	xxxxxx	110	AB	76	7.88	51.1	35.3	10	3.3	0.3	4.03	2.78	0.79	0.26	0.02	5.59	159	0.48	85.7	28.4	322
xxxxxxx	10004	xxx	Uygur	woman	53	163	72	27.0993	4.61	5.41	0.73	4.74	1.61	2.72	326.2	4.6	61	272			1.16	0.73	Junior college	retire	xxxxxxxxxxx	2018-03-10	Heart center	12	xxxxxx	110		66	5.5	56.1	32.8	5.5	4.7	0.9	3.09	1.8	0.3	0.26	0.05	4.28	126	0.38	88.7	29.3	330
xxxxxxx	9985	xxx	Uygur	man	62	178	102	32.1929	5.26	5.58	3.6	4.31	0.74	2.26	205.7	4.6	95	357	120	90	0.89	0.88	Secondary specialized school	family members	xxxxxxxxxxx	2018-03-12	Heart center	24	xxxxxx	120		80	7.2	62.3	27.9	8.2	1.5	0.1	4.49	2.01	0.59	0.11	0.01	5.26	155	0.46	87.5	29.5	338
xxxxxxx	10015	xxx	Uygur	man	46	175	72	23.5102	5.75	5.75	0.86	4.64	1.14	2.96	254.4	3.9	95	278	128	80	1.12	0.79	Secondary specialized school		xxxxxxxxxxx	2018-03-13	Heart center	5	xxxxxx	88		55	5	56.2	28.3	9.3	4.6	1.6	2.81	1.41	0.47	0.23	0.08	4.52	141	0.42	13.5	31.3	335
xxxxxxx	9994	xxx	Uygur	man	65	178	95	29.9836	7.11	7.27	2.28	3.56	0.87	1.54	206	5.94	50.97	329.39			1	0.52	middle school		xxxxxxxxxxx	2018-03-13	Heart center	190026	xxxxxx	120		80	7.6	53.7	32.2	8.2	4.9	1	4.08	2.45	0.62	0.37	0.08	4.68	129	0.4	85.8	27.6	332
xxxxxxx	10084	xxx	Uygur	woman	63	165	54	19.8347	5.01	4.98	1.14	3.61	1.04	1.96	25.9	5.9	46	170			0.94	0.58	illiterate	farmer	xxxxxxxxxxx	2018-03-16	Heart center	11	xxxxxx			80	3.7	56.2	32	11	0.7	0.1	2.08	1.18	0.41	0.03	0	3.46	110	0.33	96.5	31.9	331
xxxxxxx	10082	xxx	Uygur	man	66	165	88	32.3232	4.4	5.26	2.02	4.13	0.71	2.71	179.8	4.5	86	366			0.82	0.94		retire	xxxxxxxxxxx	2018-03-21	Heart center	10	xxxxxx			76	7.8	62.7	27.9	6.7	2.3	0.4	4.89	2.18	0.52	0.18	0.03	4.57	138	0.42	92.1	30.2	328
xxxxxxx	10087	xxx	Uygur	woman	49	165	85	31.2213	5.44	5.39	1.59	4.35	1.23	2.53	199.7	3.6	62	419			1.17	0.84	Junior college	cadre	xxxxxxxxxxx	2018-03-21	Heart center	20	xxxxxx			78	6.3	49.7	40.5	7.2	2.8	0.2	3.11	2.55	0.45	0.18	0.01	4.61	147	0.44	94.8	31.9	336
xxxxxxx	10174	xxx	Uygur	woman	56	153	89	38.0196	9.43	7.57	1.64	4.75	1.09	3.21	60.4	3.61	60.9	219.38	180	110	1.53	0.86		retire	xxxxxxxxxxx	2018-03-24	Heart center	35	xxxxxx	120	B	80	5.07	60.7	27.4	9.7	2.2	0	3.08	1.39	0.49	0.11	0	4.33	123	0.39	90.5	28.4	314
xxxxxxx	10132	xxx	Uygur	man	67	169	71	24.8591	5.29	5.2	1.56	5.32	0.86	3.37	243.1	6.04	73.02	219.95	170	85	1.04	0.46	middle school	retire	xxxxxxxxxxx	2018-03-26	Heart center	30	xxxxxx	100		76	5.24	57.4	29.8	7.3	5.3	0.2	3.01	1.56	0.38	0.28	0.01	4.75	136	0.42	89.3	28.6	321
xxxxxxx	10146	xxx	Uygur	man	58	168	84	29.7619		5.49	1.48	3	1.26	1.31									middle school	worker	xxxxxxxxxxx	2018-03-26	Heart center	23	xxxxxx	109	B	78	10.1	52	40.1	6.1	1.7	0.1	5.25	4.05	0.62	0.17	0.01	4.23	141	0.43	101.7	33.3	327
xxxxxxx	10156	xxx	Uygur	man	68	172	72	24.3375	14.4	8.37	0.92	4.14	0.71	2.6	304.3	2.86	77.7	167	150	100	1.45	1.02	Secondary specialized school	retire	xxxxxxxxxxx	2018-03-26	Heart center	23	xxxxxx			96	10.94	46.2	43	5.2	5.5	0.1	5.05	4.7	0.57	0.6	0.01	5.48	153	0.47	86.3	27.9	323
xxxxxxx	10147	xxx	Uygur	man	42	165	70	25.7117	8.74	7.57	4.36	3.82	0.51	2.11	143.9	5.86	59.9	428.78			1.23	0.77	Junior college	cadre	xxxxxxxxxxx	2018-03-27	Heart center	32	xxxxxx			69	6.33	44.8	43	9.6	2.4	0.2	2.84	2.72	0.61	0.15	0.01	4.68	129	0.41	87.2	27.6	316
xxxxxxx	10188	xxx	Uygur	man	49	176	87	28.0863	12.56	10.34	1.56	3.41	0.74	2.04	518	4.7	60	240			0.83	0.8	middle school	cadre	xxxxxxxxxxx	2018-03-27	Heart center	10	xxxxxx		O	76	6	51.4	37.2	8.11	2.8	0.2	3.08	2.23	0.5	0.17	0.01	4.78	148	0.45	94.3	30.9	327
xxxxxxx	10171	xxx	Uygur	woman	59	155	76	31.6337	12.09	7.4	2.67	4.91	0.8	3.25	42	4.74	48	263.76			1.15	1.01	middle school	retire	xxxxxxxxxxx	2018-03-28	Heart center	9	xxxxxx	105	B	80	7.4	50	36.9	9.8	3.1	0.2	3.7	2.73	0.73	0.23	0.01	4.01	121	0.37	93	30.3	326
xxxxxxx	10175	xxx	Uygur	man	58	170	86	29.7578	5.32	5.56	2.98	6.48	0.67	4.45	112.6	6.9	85.6	304.76			0.8	1.61		driver	xxxxxxxxxxx	2018-03-28	Heart center	17	xxxxxx	133		80	8.24	51.2	41	6.9	0.8	0.1	4.22	3.38	0.57	0.07	0.01	4.68	135	0.42	89.5	28.8	322
xxxxxxx	10181	xxx	Uygur	man	46	165	68	24.977	7.83	7.47	2.18	6.02	1.23	4.79		2.61	59.2	291.3	162	114			middle school	civil servant	xxxxxxxxxxx	2018-03-29	Heart center	18	xxxxxx			92	5.99	62.7	28	7.5	1.3	0.5	3.76	1.68	0.45	0.08	0.03	4.92	137	0.43	87.6	27.8	318
xxxxxxx	10177	xxx	Han	man	57	165	75	27.5482	5.02	5.17	2	3.76	1.12	1.99	74.9	4.7	83	229			1.3	0.79	Secondary specialized school	cadre	xxxxxxxxxxx	2018-03-30	Heart center	40	xxxxxx			70	6.3	55.7	33.8	8.8	1	0.7	3.51	2.13	0.55	0.06	0.04	5.21	160	0.48	92.6	30.7	331
xxxxxxx	10182	xxx	Uygur	man	41	165	72	26.4463	4.35	4.8	0.72	2.33	1	1.29		5.04	63.9	188.78	120	80			middle school	driver	xxxxxxxxxxx	2018-03-30	Heart center	16	xxxxxx			96	6.89	47.1	36.4	10.3	6.1	0.1	3.25	2.51	0.17	0.42	0.01	5.17	142	0.46	88	27.5	312
xxxxxxx	10194	xxx	Uygur	man	63	160	63	24.6094	11.92	8.85	3.15	4.73	0.71	3.08	141.3	5	71	199			0.9	1.03	Junior college	retire	xxxxxxxxxxx	2018-03-30	Heart center	29	xxxxxx	85	B	72	6.1	44.7	39.6	8.8	4.4	2.5	2.73	2.42	0.54	0.27	0.15	4.67	146	0.44	93.8	31.3	332
xxxxxxx	10200	xxx	Uygur	woman	66	165	72	26.4463	5.99	5.37	1.93	3.41	0.97	1.88	316.1	7.3	87	386	180	90	1.12	0.67	middle school	family members	xxxxxxxxxxx	2018-03-31	Heart center	24	xxxxxx			81	8.31	76.8	14.8	6.6	1.6	0.2	6.38	1.23	0.55	0.13	0.02	3.68	104	0.33	89.4	28.3	316
xxxxxxx	10199	xxx	Uygur	man	60	173	95	31.7418	5.48	5.45	1.2	5.17	1.25	3.49	139.5	5.1	73	450			1.33	1.11	Junior college	cadre	xxxxxxxxxxx	2018-03-31	Heart center	31	xxxxxx	112	AB	80	5.9	53.6	32.6	9.7	3.4	0.7	3.16	1.92	0.57	0.2	0.04	4.67	144	0.44	93.6	30.9	330
xxxxxxx	10203	xxx	Han	woman	57	166	59	21.4109	6.08	5	0.5	3.08	1.23	1.44	29	4.59	57.29	215.14			0.96	0.22	middle school		xxxxxxxxxxx	2018-03-31	Heart center	29	xxxxxx	84	O	72	2.03	54.2	33	11.8	1	0	1.1	0.67	0.24	0.02	0.02	3.51	111	0.36	101.4	31.6	312
xxxxxxx	10462	xxx	Uygur	man	44	173	77	25.7276	8.58	7.07	1.46	2.92	0.65	1.77	733.4	3.01	65.5	206.41	100	70	1.44	0.35	——	teacher	xxxxxxxxxxx	2018-04-15	Heart center	29	xxxxxx	100	O	80	5.4	70.2	18.3	8.7	2.6	0.2	3.79	0.99	0.47	0.14	0.01	4.71	144	0.44	93.2	30.5	327
xxxxxxx	10189	xxx	Uygur	man	68	166	68	24.677	7.72	7.46	1.26	2.71	0.73	1.64	231.2	3.1	62	253			0.96	2.62	middle school		xxxxxxxxxxx	2018-04-01	Heart center	6	xxxxxx	120	O	72	7.07	63.1	24.9	10.6	1.1	0.3	4.46	1.76	0.75	0.08	0.02	4.36	128	0.41	93.1	29.4	3.5
xxxxxxx	10206	xxx	Han	man	38	170	95	32.872	5.39	5.1	6.45	4.75	0.65	2.32	85.5	5.46	81.98	446.55	130	90	0.96	0.44	Master	teacher	xxxxxxxxxxx	2018-04-02	Heart center	3	xxxxxx	103	B	76	6.1	52	36.4	8.3	2.5	0.8	3.17	2.22	0.51	0.15	0.05	4.3	136	0.55	128.8	31.6	245
xxxxxxx	10219	xxx	Uygur	man	66	175	86	28.0816	5.09	4.98	1.56	4.34	1.17	2.53	333	5.68	72.73	369.1	160	100	1.15	0.66	Junior college	retire	xxxxxxxxxxx	2018-04-01	Heart center	49	xxxxxx	110		65	7	69.3	19.4	8.3	2.9	0.1	4.85	1.36	0.58	0.2	0.1	4.58	130	0.41	88.8	28.3	319
xxxxxxx	10221	xxx	Han	man	51	177	98	31.2809	3.59	5.24	2.71	5.69	0.84	4.24	134.3	4.4	75	373	180	90	1.11	1.44	middle school		xxxxxxxxxxx	2018-04-04	Heart center	47	xxxxxx	117		78	6.9	72.3	21.8	5.2	0.5	0.2	4.99	1.5	0.36	0.03	0.01	4.89	152	0.46	93.4	31.1	333
xxxxxxx	10220	xxx	Han	woman	49	158	55	22.0317	4.36	5.25	0.98	3.56	0.89	2.47	350.3	4.8	57	182	120	70	1.02	0.81	Junior college	cadre	xxxxxxxxxxx	2018-04-04	Heart center	34	xxxxxx	66		68	5	56.1	33.2	5.9	4.3	0.5	2.81	1.66	0.29	0.22	0.03	3.73	117	0.36	95.8	31.3	327
xxxxxxx	10218	xxx	Uygur	man	67	169	78	27.31	4.6	5.09	2.01	4.16	0.87	2.78	83.9	5.9	66	258			0.82	0.96	Secondary specialized school		xxxxxxxxxxx	2018-04-05	Heart center	190012	xxxxxx	90		96	7.8	56.2	34.3	8.1	1	0.4	4.38	2.68	0.63	0.08	0.03	4.34	124	0.38	88.2	28.7	325
xxxxxxx	10211	xxx	Han	man	31	173	80	26.7299		4.83	0.65	2.28	0.92	1.13									middle school	retire	xxxxxxxxxxx	2018-04-05	Heart center	20	xxxxxx	100		78
xxxxxxx	10227	xxx	Han	man	40	175	76	24.8163	4.77	5.33	2.3	5.04	0.98	3.41	81	5.9	56	422			1.08	1.22	undergraduate college	soldier	xxxxxxxxxxx	2018-04-06	Heart center	32	xxxxxx	90		76	6.7	59.7	30.3	4.6	5.1	0.3	4	2.03	0.31	0.34	0.02	4.94	152	0.46	93	30.7	330
xxxxxxx	10310	xxx	Uygur	man	59	173	80	26.7299	4.86	5.16	2.03	4.21	0.69	2.75	308.7	4.6	72	331	120	80	0.9	1.03	undergraduate college	cadre	xxxxxxxxxxx	2018-04-09	Heart center	45	xxxxxx	95		78	8.5	57.4	31.1	7.1	4.1	0.1	4.88	7.66	0.6	0.35	0.1	5.01	163	0.5	98.9	32.6	329
xxxxxxx	10298	xxx	Uygur	woman	50	165	77	28.2828	5.74	5.32	2.59	4.77	0.9	2.95	169.6	44	38	175	150	80	1.19	1.07	Secondary specialized school	farmer	xxxxxxxxxxx	2018-04-10	Heart center	22	xxxxxx			90	5	49	38.7	8.6	3.3	0.4	2.45	1.93	0.43	0.17	0.02	4	130	0.37	91.6	32.5	355
xxxxxxx	10313	xxx	Han	man	87	171	65	22.2291	4.51	5.27	1.02	3.08	0.94	1.65	166.7	5.5	99	289	160	130	0.84	0.7	middle school	retire	xxxxxxxxxxx	2018-04-11	Heart center	12	xxxxxx	72	B	60	3.4	59.5	26.2	10.8	3.5	0	2.02	0.89	0.37	0.12	0	3.73	140	0.4	108.1	37.7	349
xxxxxxx	10311	xxx	Uygur	man	61	167	73	26.1752	5.08	5.86	1.84	10.76	0.99	8.54	1176.9	3.4	69	299	175	95	1.03	2.47	middle school	farmer	xxxxxxxxxxx	2018-04-11	Heart center	19	xxxxxx	90		64	4.9	48.4	43.1	7.1	0.9	0.5	2.37	2.11	0.35	0.04	0.02	3.68	121	0.36	96.9	33	341
xxxxxxx	10338	xxx	Uygur	man	68	165	87	31.9559	5.4	5.37	2.26	6.65	0.82	4.93	131.6	5	86	367			1.02	1.51	Junior college	retire	xxxxxxxxxxx	2018-04-11	Heart center	23	xxxxxx	110		72	7.4	55.2	34.2	9.1	1.5	0.6	4.08	2.53	0.67	0.11	0	4.78	158	0.48	100	33	329
xxxxxxx	10347	xxx	Uygur	man	48	160	62	24.2187	11.08	7.27	3.42	5.64	1.14	2.56	303.6	6.15	45.66	168.19	200	120	1.19	0.4	Secondary specialized school	worker	xxxxxxxxxxx	2018-04-11	Heart center	13	xxxxxx	90	A	81	8.53	61.6	30.4	5	2.9	0.1	5.25	2.59	0.43	0.25	0.01	5.1	127	0.41	80.4	24.9	310
xxxxxxx	10317	xxx	Han	man	42	178	82	25.8806	5.09	5.27	1.34	5.17	0.79	3.66	352.3	5.6	77	259			0.92	1.19	Junior college		xxxxxxxxxxx	2018-04-11	Heart center	45	xxxxxx	88	B	96	5.9	54.3	29.1	14.3	2.2	0.1	3.1	1.66	0.82	0.13	0.01	4.44	142	0.43	96.4	32	332
xxxxxxx	10299	xxx	Han	woman	72	165	55	20.202	4.3	5.31	0.92	4.36	1.19	2.86	175	6.2	72	285	115	70	1.16	0.71	middle school	retire	xxxxxxxxxxx	2018-04-11	Heart center	20	xxxxxx			70
xxxxxxx	10314	xxx	Han	woman	64	165	66	24.2424	5.42	5.89	1.19	5.02	1.07	3.44	127.5	6.1	61	296			1.13	1.19	middle school	retire	xxxxxxxxxxx	2018-04-11	Heart center	33	xxxxxx	86	A	64	5.3	56.6	34.6	6.8	1.32	0.7	3	1.83	0.36	0.07	0.04	4	130	0.37	90.8	32.1	353
xxxxxxx	10312	xxx	Uygur	man	49	180	95	29.321	5.91	4.9	2.53	7.71	0.88	5.73	131.8	4.87	125	339.4	110	70	0.97	1.57	Secondary specialized school		xxxxxxxxxxx	2018-04-12	Heart center	28	xxxxxx	110		74	10.4	62.6	33.3	2.4	1.2	0.5	6.51	3.46	0.25	0.12	0.05	5.47	165	0.33	97.5	30.2	310
xxxxxxx	10318	xxx	Han	woman	70	159	71	28.0843	7.34	6.97	1.29	4.37	1.06	2.91	77.5	3.38	62.4	195.79	150	90	1.61	0.76	Secondary specialized school	retire	xxxxxxxxxxx	2018-04-12	Heart center	22	xxxxxx	82	AB	72	5.8	51.1	38.6	8.1	2	0.2	2.96	2.24	0.47	0.12	0.01	4.52	144	0.44	97.9	32	327
xxxxxxx	10306	xxx	Uygur	man	52	170	73	25.2595	5.29	5.1	2.96	5.44	0.71	2.81	175.3	4.01	75.2	366.24	140	80	1.68	0.99	illiterate		xxxxxxxxxxx	2018-04-12	Heart center	10	xxxxxx	85		70	8.1	56.2	36.4	6.1	1.1	0.2	4.55	2.95	0.49	0.09	0.02	4.81	155	0.47	97.6	32.1	329
xxxxxxx	10358	xxx	Uygur	man	70	170	76	26.2976	4.96	5.04	1.74	4.04	0.69	2.58	91.9	6.2	65	310	200	150	0.9	0.98	Junior college	retire	xxxxxxxxxxx	2018-04-15	Heart center	25	xxxxxx		O	70	6.7	60.5	26.3	9.1	3.6	0.5	4.05	1.76	0.61	0.24	0.03	4.42	153	0.43	98.1	34.5	352
xxxxxxx	10517	xxx	Uygur	man	42	165	76	27.9155	4.21	5.25	1.99	4.77	0.97	3.17	267.7	6.1	66	412			0.87	1.07	middle school	farmer	xxxxxxxxxxx	2018-05-07	Heart center	34	xxxxxx			74	7.6	58.6	28.7	10.1	2.3	0.3	4.45	2.18	0.77	0.17	0.02	5.23	135	0.41	77.4	25.8	333
xxxxxxx	10670	xxx	Uygur	woman	34	159	71	28.0843	4.61	4.6	3.33	3.88	0.63	2.44	95.4	6.11	55.6	183.55	100	70	1.41	0.9	middle school		xxxxxxxxxxx	2018-05-14	Heart center	13	xxxxxx	100	O	67	6.64	53.6	35.1	8.1	2.9	0.3	3.56	2.33	0.54	0.19	0.02	4.14	119	0.37	90.1	28.7	319
xxxxxxx	10685	xxx	Han	man	52	172	83	28.0557	3.42	6	0.98	3.87	1.18	2.2	82.9	6.3	82	369	160	120	1.03	0.72	middle school	civil servant	xxxxxxxxxxx	2018-05-15	Heart center	32	xxxxxx		AB	68	7.3	60.2	30.3	7.2	1.5	0.8	4.39	2.21	0.53	0.11	0.06	4.44	151	0.44	99.2	33.9	342
xxxxxxx	10687	xxx	Han	man	48	173	70	23.3887	3.55	4.99	0.82	3.56	1.25	1.71	107	3.4	62	187	150	115	0.92	0.62	middle school	worker	xxxxxxxxxxx	2018-05-15	Heart center	20	xxxxxx	104	A	63	6.4	52.6	34.8	10.5	1.6	0.5	3.37	2.23	0.67	0.1	0.03	4.37	159	0.49	111.6	36.4	326
xxxxxxx	10719	xxx	Han	man	81	165	50	18.3655	4.27	5.5	0.79	2.57	0.82	1.45	188.8	7	83	335	120	70	0.88	0.41	Secondary specialized school	farmer	xxxxxxxxxxx	2018-05-15	Heart center	5	xxxxxx	73	A	63	6.9	70.9	19.1	6	3.5	0.5	4.89	1.32	0.41	0.24	0.03	3.76	116	0.36	96.4	30.8	320
xxxxxxx	10701	xxx	Han	woman	56	158	56	22.4323	6.46	4.4	1.8	3.22	1.36	1.09	259	5.84	84.7	251.94	180	100	1.81	0.58	Junior college	retire	xxxxxxxxxxx	2018-05-16	Heart center	7	xxxxxx	68	AB	68	6.2	71.3	28.4	0.1	0	0.2	4.42	1.76	0.01	0	0.01	4.2	129	0.39	92.3	30.7	332
xxxxxxx	10689	xxx	Han	woman	79	160	50	19.5312	3.91	5.37	1.29	3.02	1.02	1.58	131.2	6.1	64	321	110	70	1.2	0.54	Secondary specialized school	retire	xxxxxxxxxxx	2018-05-16	Heart center	27	xxxxxx	67	A	80	4.8	53.6	32.9	9.9	3.1	0.5	2.57	1.58	0.48	0.15	0.02	4.1	135	0.39	95.3	32.9	345
xxxxxxx	10695	xxx	Han	man	33	175	86	28.0816	5.18	5.35	10.63	5.9	0.68	1.87		5.7	59	424	107	80	0.99	0.95	middle school	farmer	xxxxxxxxxxx	2018-05-16	Heart center	1	xxxxxx	90	A	73	7.2	60.3	28.7	9	1.3	0.7	4.34	2.07	0.65	0.09	0.05	5.56	167	0.52	93	30.1	324
xxxxxxx	10691	xxx	Han	woman	70	159	60	23.7332	4.61	5.37	1.39	4.74	1.8	2.37	115.6	6.8	64	245	180	100	1.68	0.91	undergraduate college	doctor	xxxxxxxxxxx	2018-05-17	Heart center	2	xxxxxx	71	AB	64	6.6	68	20	5	7.02	0	4.49	1.32	0.33	0.46	0	5.03	145	0.46	91.1	28.8	316
xxxxxxx	10679	xxx	Han	man	52	190	69	19.1136	4.24	5.35	1.17	4.47	1.29	2.84	107.9	5.6	78	362	130	70	1.2	0.91	middle school	worker	xxxxxxxxxxx	2018-05-17	Heart center	12	xxxxxx		AB	68	5.3	48.5	37	10	4	0.5	2.57	1.96	0.53	0.21	0.03	4.8	148	0.44	90.7	30.9	341
xxxxxxx	10686	xxx	Han	woman	61	166	71	25.7657	4.29	5.43	1.49	3.51	1.19	1.82	230	6.1	66	332	160	120	1.26	0.73	Junior college	retire	xxxxxxxxxxx	2018-05-17	Heart center	13	xxxxxx	80	O	57	6.1	61.6	29.5	6.5	2.3	0.1	3.76	1.8	0.4	0.14	0.01	3.86	132	0.39	100.4	34.2	340
xxxxxxx	10676	xxx	Han	woman	60	161	64	24.6904	4.31	5.49	2.37	5.1	1.17	3.08	72.4	6.2	63	297	180	110	1.28	1.13	Secondary specialized school	retire	xxxxxxxxxxx	2018-05-17	Heart center	6	xxxxxx	103	B	92	4.55	56.1	33.9	8.7	1.1	0.2	2.52	1.53	0.39	0.05	0.01	4.25	132	0.41	95.4	31.1	326
xxxxxxx	10664	xxx	Han	woman	76	162	71	27.0538	5.86	4.5	0.95	2.99	0.91	1.51	3	2.73	53.95	281.14	185	60	1.18	0.62	middle school	worker	xxxxxxxxxxx	2018-05-17	Heart center	7	xxxxxx	113		68	5.01	60.9	25.5	10.8	2.6	0.2	3.05	1.28	0.54	0.13	0.01	3.86	119	0.36	93.8	30.8	329
xxxxxxx	10724	xxx	Han	woman	58	155	47	19.563	5.77	4.6	0.98	4.26	1	2.54	491.1	5.9	57.3	176.94	100	70	1.45	0.85	middle school	worker	xxxxxxxxxxx	2018-05-17	Heart center		xxxxxx	55	B	64	4.2	48.6	39.8	7.6	3.8	0.2	2.04	1.67	0.32	0.16	0.01	4.33	122	0.38	88.5	28.2	319
xxxxxxx	10644	xxx	Han	man	60	165	89	32.6905	5.21	4.4	3.39	3.77	0.83	2.1	131.6	5.07	95.31	219.97			1.33	0.8	Secondary specialized school	driver	xxxxxxxxxxx	2018-05-17	Heart center	10	xxxxxx			80	4.18	56.9	35.4	6.7	1	0	2.38	1.48	0.28	0.04	0	5	145	0.46	92.8	29	313
xxxxxxx	10710	xxx	Han	man	73	170	65	22.4913	6.03	4.6	2.07	5.97	1.02	4.03	138.3	4.33	93	333.82	150	105	1.09	1.43	Junior college		xxxxxxxxxxx	2018-05-18	Heart center	40	xxxxxx	104	A	92	7.71	59.6	28	3.1	9.2	0.1	4.6	2.16	0.24	0.71	0.01	4.68	147	0.45	96.8	31.4	325
xxxxxxx	10702	xxx	Han	man	65	170	68	23.5294	4.12	4.7	3.51	5.33	1.16	3.39	342	7.17	75.08	433.67	170	110	1.7	1.02	Junior college	office worker	xxxxxxxxxxx	2018-05-19	Heart center	35	xxxxxx	107	O	64	6.08	50.3	36.2	8.6	4.4	0.5	3.06	2.2	0.52	0.27	0.03	4.53	144	0.45	98.7	31.8	322
xxxxxxx	10773	xxx	Han	woman	68	167	66	23.6652	5.22	4.9	2.62	4.57	0.72	2.84	355.1	3.26	53.9	295.36	130	80	1.41	0.96	Secondary specialized school		xxxxxxxxxxx	2018-05-22	Heart center	46	xxxxxx	80		87	5.25	57.1	31.4	8.6	2.7	0.2	3	1.65	0.45	0.14	0.01	4.56	135	0.43	93.4	29.6	317
xxxxxxx	10856	xxx	Uygur	woman	57	155	70	29.1363	8.74	9.32	16.32	8.41	0.55	1.82	522	3.1	38	234	150		1.03	1.17			xxxxxxxxxxx	2018-05-23	Heart center	51	xxxxxx	97	B	84	5.67	52.7	37.6	6.5	2.8	0.4	2.99	2.13	0.37	0.16	0.02	5.08	143	0.42	82.9	28.1	340
xxxxxxx	10799	xxx	Uygur	man	62	165	68	24.977	4.76	5.24	2.16	5.31	0.9	3.55	351.5								Secondary specialized school	farmer	xxxxxxxxxxx	2018-05-23	Heart center	1900116	xxxxxx	76	B	72	8.12	47.7	41.3	8.1	2.7	0.2	3.87	3.35	0.66	0.72	0.02	5.09	153	0.47	91.9	30.1	327
xxxxxxx	10745	xxx	Han	woman	59	160	65	25.3906	5.36	4.99	1.06	3.76	0.96	2.33	94.7	7.9	81	347	160	90	1.07	0.78	illiterate	retire	xxxxxxxxxxx	2018-05-23	Heart center	7	xxxxxx	70	A	43	5.4	50.6	37.4	9.2	1.9	0.9	2.73	2.02	0.5	0.1	0.05	4.17	134	0.39	92.5	32.2	348
xxxxxxx	10835	xxx	Han	man	54	165	61	22.4059	4.34	5.09	1.49	4.7	1.16	3.18	102	6	81	402	120	90	1.15	1.12	Junior college	retire	xxxxxxxxxxx	2018-05-24	Heart center	48	xxxxxx			70	5.2	70.9	19.3	7.8	1.4	0.6	3.69	1	0.41	0.07	0.03	5.22	157	0.49	93.6	30.2	322
xxxxxxx	10753	xxx	Han	woman	62	160	62	24.2187	4.25	5.18	1.3	3.61	1.23	1.96	149.1	3.8	62	264			0.98	0.75	middle school	retire	xxxxxxxxxxx	2018-05-24	Heart center	36	xxxxxx	90		65	6.94	64	26.8	7.1	1.7	0.4	4.44	1.86	0.49	0.12	0.03	4.21	119	0.36	85	28.3	332
xxxxxxx	10777	xxx	Han	woman	57	152	54	23.3726	4.65	5.17	0.88	4.34	1.49	2.53	211.5	4	33	216	110	80	1.23	0.9	middle school	retire	xxxxxxxxxxx	2018-05-24	Heart center	34	xxxxxx	76	A	76	5.7	67.6	22.6	8.4	1.2	0.2	3.85	1.29	0.48	0.07	0.01	4.09	129	0.38	92.1	31.5	342
xxxxxxx	10761	xxx	Han	man	60	173	88	29.4029	4.3	5.34	1.17	2.8	0.74	1.61	225.4	3.9	70	367			0.82	0.65		retire	xxxxxxxxxxx	2018-05-25	Heart center	38	xxxxxx	87		80	5.9	56.2	32.8	6.8	3.8	0.4	3.32	1.94	0.4	0.22	0.02	4.08	138	0.41	99.5	33.8	340
xxxxxxx	10749	xxx	Han	man	51	178	105	33.1398	4.82	5.53	2.03	3.62	0.85	2.17	187.9	5.51	78	410			0.88	0.77		worker	xxxxxxxxxxx	2018-05-25	Heart center	19	xxxxxx	110		62	6.22	52.7	32.8	10.2	4.2	0.1	3.27	2.03	0.63	0.26	0.01	3.93	133	0.38	96.2	33.9	352
xxxxxxx	10771	xxx	Han	man	64	176	78	25.1808	6.76	5.09	2.41	4.06	0.64	2.75	75.3	6.3	85	373			0.85	1.1	Junior college	retire	xxxxxxxxxxx	2018-05-26	Heart center	2	xxxxxx	87		85	7	42.7	48	7.6	1	0.7	2.99	3.36	0.53	0.07	0.05	4.5	153	0.44	97.7	34	348
xxxxxxx	10810	xxx	Han	man	41	168	74	26.2188	4.16	5.05	2.4	3.25	1.15	1.51	291.8	6	67	283	110	70	1.06	0.65	Junior college	office worker	xxxxxxxxxxx	2018-05-28	Heart center	11	xxxxxx	84	O	75	8.5	71.9	78.5	7.7	1.8	0.1	6.11	1.57	0.65	0.15	0.01	4.83	134	0.41	85.8	27.6	322
xxxxxxx	10793	xxx	Han	woman	73	159	60	23.7332	6.85	4.5	1.75	3.08	0.85	1.54	278.8	4.39	66.9	267.51			1.41	0.67	middle school	retire	xxxxxxxxxxx	2018-05-28	Heart center	8	xxxxxx	84	AB	60	6.38	65.6	29.9	3.9	0.5	0.2	4.19	1.91	0.24	0.03	0.01	4.28	124	0.39	90.2	29	321
xxxxxxx	10808	xxx	Han	woman	73	165	68	24.977	4.87	4.6	1.55	3.72	1.11	2.42	267.2	3.82	44.43	327.61			1.46	0.74	Junior college	retire	xxxxxxxxxxx	2018-05-28	Heart center	8	xxxxxx	90	O	67	6.96	63.9	25.7	7.5	2.6	0.3	4.45	1.79	0.52	0.18	0.02	4.15	125	0.38	91.6	30.1	329
xxxxxxx	10883	xxx	Uygur	woman	78	158	56	22.4323	4.75	5.52	0.94	5.04	1.48	3.18	422	6.1	75	256	180	108	1.33	1.05	Secondary specialized school		xxxxxxxxxxx	2018-05-30	Heart center	40	xxxxxx	110	O	80	5.2	58.4	31.6	7.3	1.4	1.3	3.04	1.64	0.38	0.07	0.07	4	124	0.36	90.2	31	344
xxxxxxx	10858	xxx	Han	woman	76	150	66	29.3333	4.67	5.55	1.19	4.89	1.38	3.1	211.7	4.3	43	336	150	80	1.19	0.86	Secondary specialized school	cadre	xxxxxxxxxxx	2018-05-30	Heart center	44	xxxxxx	89	O	78	5.9	69.4	24.7	5	0.8	0.1	4.09	1.46	0.29	0.05	0.01	4.65	146	0.43	93.3	31.4	337
xxxxxxx	10802	xxx	Uygur	man	37	168	69	24.4473	7.48		0.88	3.02	0.75	2.72	25								Junior college		xxxxxxxxxxx	2018-05-30	Heart center	12	xxxxxx	84	A	69	5.16	59.3	30.6	6.8	2.9	0.4	3.06	1.58	0.35	0.15	0.02	5.13	147	0.46	59.9	28.7	319
xxxxxxx	10826	xxx	Han	man	39	172	67	22.6474	3.79	4.98	1.19	4.96	1.68	2.97	279.9	7.8	78	395	110	70	1.45	0.91	middle school		xxxxxxxxxxx	2018-05-31	Heart center	31	xxxxxx	110	B	74	5.4	61.5	27.7	10.3	0.3	0.2	3.32	1.5	0.56	0.02	0.01	4.82	164	0.47	97.6	33.1	339
xxxxxxx	10894	xxx	Uygur	man	52	165	70	25.7117	9.1	8.92	1.72	3.68	0.91	2.13	282.7	5.5	91	212	160	110	0.97	0.91	middle school	office worker	xxxxxxxxxxx	2018-06-01	Heart center	24	xxxxxx	75		76	5.58	59.7	24.9	12.5	2.7	0.2	3.33	1.39	0.7	0.15	0.01	4.98	146	0.45	89.6	29.3	327
xxxxxxx	10847	xxx	Uygur	woman	26	170	55	19.0311	3.63	5.43	0.72	3.11	1.42	1.24	196.7	4	60	209	96	60	1.19	0.43	Junior college	office worker	xxxxxxxxxxx	2018-06-02	Heart center	28	xxxxxx	76	O	76	6.1	47.6	39.8	6.9	5.3	0.4	2.9	2.43	0.42	0.32	0.02	3.78	125	0.36	95.8	33.1	346
xxxxxxx	10877	xxx	Uygur	woman	55	155	70	29.1363	17.28	7.07	0.69	2.57	0.58	3.81	352	6.15	66.1	216	150		0.95	0.74	Secondary specialized school	retire	xxxxxxxxxxx	2018-06-03	Heart center	12	xxxxxx	84	B	64	6.18	71.2	21.4	5.7	1.5	0.2	4.4	1.32	0.35	0.09	0.01	4.6	126	0.41	88.3	27.3	310
xxxxxxx	10862	xxx	Uygur	man	77	176	81	26.1493	5.33	4.9	3.75	5.43	0.95	3.81	207	7.82	98.1	527	150	110	1.77	1.26	middle school	retire	xxxxxxxxxxx	2018-06-04	Heart center	38	xxxxxx	106	B	80	6.32	60	28	9.5	2.1	0.3	3.8	1.07	0.6	0.13	0.02	4.26	117	0.37	27.5	315	14.3
xxxxxxx	10864	xxx	Uygur	man	62	160	67	26.1719	3.29	4.5	0.63	3.09	0.86	1.65	10.6	5.69	65	286	180	100	0.99	0.6	illiterate	farmer	xxxxxxxxxxx	2018-06-04	Heart center	45	xxxxxx	72	B	78	7.5	67	21.3	6.4	5	0.3	5.03	1.6	0.48	0.38	0.02	4.26	136	0.4	92.9	31.9	343
xxxxxxx	10904	xxx	Han	woman	44	165	55	20.202	6.14	4.94	3.46	4.49	0.77	2.25	250.6	4.21	76.89	226	115	60	1.37	0.92	Secondary specialized school	worker	xxxxxxxxxxx	2018-06-04	Heart center	6	xxxxxx	94		78	5.25	65.9	24.8	7.8	1.3	0.2	3.46	1.3	0.41	0.07	0.01	3.69	116	0.36	96.2	31.4	327
xxxxxxx	10887	xxx	Han	woman	68	160	49	19.1406	4.68	5.31	0.94	4.47	1.58	2.64	122.5	6.8	64	246	120	60	1.16	0.8	middle school	retire	xxxxxxxxxxx	2018-06-04	Heart center	37	xxxxxx	110	B	70	7.1	67.4	22	8.4	1.6	0.6	4.79	1.56	0.6	0.11	0.04	4.12	134	0.39	93.8	32.6	348
xxxxxxx	10857	xxx	Han	man	46	170	60	20.7612	4.13	5.19	1.94	4.01	1.12	2.3	205.7	5.3	81	358	120	80	1.18	0.91	middle school	cadre	xxxxxxxxxxx	2018-06-04	Heart center	18	xxxxxx	83	O	76	8	57.2	32	6.3	3.9	0.6	4.58	2.56	0.5	0.31	0.05	4.78	165	0.46	96.4	34.5	358
xxxxxxx	10875	xxx	Uygur	man	45	175	74	24.1633	6.6	5.1	2.97	3.7	0.52	2	94	6.63	95	344	105	70	1.2	0.8	Junior college	driver	xxxxxxxxxxx	2018-06-05	Heart center	48	xxxxxx		B	63	6.15	66.2	22.8	9.3	1.5	0.2	4.07	1.4	0.57	0.09	0.01	4.4	129	0.39	88.6	29.3	331
xxxxxxx	10893	xxx	Han	man	40	160	63	24.6094	4.41	5.57	2.25	4.35	0.98	2.83	88.3	3.9	122	265	98	68	1.07	1.02	middle school	others	xxxxxxxxxxx	2018-06-05	Heart center	33	xxxxxx	109	O	76	6.7	42.5	47.4	7.9	2	0.2	2.85	3.18	0.53	0.13	0.01	5.38	154	0.48	88.3	28.5	323
xxxxxxx	10873	xxx	Uygur	woman	56	168	100	35.4308	8.59	6.47	1.86	6.07	1.35	4.56		4.32	61.6	226.8					Junior college	teacher	xxxxxxxxxxx	2018-06-06	Heart center	35	xxxxxx		B	72	5.39	59.1	30.1	8	2.6	0.2	3.19	1.62	0.43	0.14	0.01	4.47	117	0.28	84.8	26.2	309
xxxxxxx	10871	xxx	Uygur	man	43	180	84	25.9259	11.73	6.67	1.22	3.79	0.78	2.63	149	5.46	71.2	200.5	125	80	0.91	0.92	middle school		xxxxxxxxxxx	2018-06-06	Heart center	23	xxxxxx		O	92	8.9	63.6	28.4	6.3	1.6	0.1	5.66	2.53	0.56	0.14	0.01	5.16	147	0.43	83.7	28.5	340
xxxxxxx	10888	xxx	Uygur	man	64	165	70	25.7117	4.44	5.3	1.22	4.51	1	2.94	202.3	3.6	73	322	160	100	1.13	0.94	middle school	farmer	xxxxxxxxxxx	2018-06-06	Heart center	39	xxxxxx			72	10.4	60.5	29.3	9.3	0.7	0.2	6.29	3.05	0.97	0.07	0.02	5.2	154	0.48	91.7	29.6	323
xxxxxxx	10884	xxx	Han	woman	40	160	68	26.5625	4.46	5.25	1.52	3.91	1	2.46	540	3.8	47	326	150		1.02	0.82	Secondary specialized school		xxxxxxxxxxx	2018-06-06	Heart center	41	xxxxxx	94	B	76	7.54	54.2	34.3	9.2	1.9	0.3	4.09	2.59	0.69	0.14	0.02	4.3	126	0.39	90.2	29.3	325
xxxxxxx	10889	xxx	Uygur	man	54	180	95	29.321	6.15	6.07	6.32	3.81	0.58	1.05	590.7	4.1	82	333	130	80	1.02	0.48	undergraduate college	policeman	xxxxxxxxxxx	2018-06-06	Heart center	3	xxxxxx	90	AB	72	6.5	58	30.6	7.2	3.5	0.7	3.77	1.99	0.47	0.23	0.05	4.38	144	0.43	98.3	33	335
xxxxxxx	10935	xxx	Uygur	man	71	177	62	19.79	4.55	5.41	2.38	5.59	0.96	3.74	227.4	7.2	81	303	164	104	0.96	1.33		retire	xxxxxxxxxxx	2018-06-07	Heart center	16	xxxxxx	130		107	9.6	56.6	32.8	5.8	4.3	0.5	5.43	3.15	0.56	0.41	0.05	5.16	148	0.45	87.7	28.7	327
xxxxxxx	10900	xxx	Han	woman	72	160	58	22.6562	6.01	5.89	2.33	5.07	0.99	3.16		5.5	50	257					Secondary specialized school	retire	xxxxxxxxxxx	2018-06-07	Heart center	34	xxxxxx			72	4	54.3	33.4	8.9	3.2	0.2	2.17	1.34	0.36	0.13	0.01	4.71	138	0.4	84	29.3
xxxxxxx	10898	xxx	Uygur	woman	73	162	68	25.9107	4.35	5.3	1.55	3.95	0.79	2.64	24.4	9.2	101	388	125	70	0.86	0.93	middle school	retire	xxxxxxxxxxx	2018-06-07	Heart center	21	xxxxxx	90	AB	65	6.8	63.8	27.3	4.7	3.7	0.5	4.34	1.86	0.32	0.25	0.03	4.23	128	0.37	87.4	30.3	347
xxxxxxx	10902	xxx	Uygur	man	84	180	73	22.5309	3.82	5.2	0.53	3.25	0.8	1.64	20.1	5.9	62.8	281.5	140	90	1.33	0.72	illiterate		xxxxxxxxxxx	2018-06-07	Heart center	18	xxxxxx	93	A	64	4.19	52	37.7	8.4	1.4	0.5	2.18	1.58	0.35	0.35	0.06	5.53	173	0.54	98.2	31.3	319
xxxxxxx	10959	xxx	Han	man	63	165	77	28.2828	8.24	8.08	1.37	4.8	1.19	3.1	60.3	4	75	381	120	80	1.04	1.04	middle school	retire	xxxxxxxxxxx	2018-06-08	Heart center	44	xxxxxx	98		80	4.6	60.9	26.3	10.2	2.5	0.1	2.8	1.21	0.47	0.12	0	4.34	142	0.41	93.3	32.6	349
xxxxxxx	10922	xxx	Han	woman	67	165	68	24.977	10.9	7.07	2.74	4.82	0.74	2.82	138.9	5.01	58.2	190.9	170	110	1.33	0.93	Secondary specialized school	retire	xxxxxxxxxxx	2018-06-11	Heart center	1	xxxxxx	110	O	72	4.55	59.4	32.7	6.2	1.5	0.2	2.7	1.49	0.28	0.07	0.01	4.22	123	0.39	91.7	29.1	318
xxxxxxx	10934	xxx	Uygur	man	62	165	70	25.7117	6.62	5.93	2.57	4.06	0.74	2.53	41.5	5.7	73	233	130	90	0.92	0.87	undergraduate college	office worker	xxxxxxxxxxx	2018-06-11	Heart center	47	xxxxxx			84	8.1	51.6	39.2	7.7	0.11	0.01	4.18	3.18	0.62	0.11	0.01	4.31	126	0.44	102.4	33.8	330
xxxxxxx	10975	xxx	Uygur	man	54	173	89	29.737	4.98	5.3	1.8	6.05	1.01	4.2	99.7	5	70	220	160	100	1.04	1.18	middle school		xxxxxxxxxxx	2018-06-11	Heart center	13	xxxxxx	130		72	6.6	68.4	22.8	6.8	1.1	0.9	4.51	1.5	0.45	0.07	0.06	4.46	148	0.42	93.4	33.1	355
xxxxxxx	10916	xxx	Han	woman	48	158	63	25.2363	4.61	5.39	1.5	3.73	1.15	2.27	37	4.7	54	3.7	110	60	0.99	0.8	not in details	cadre	xxxxxxxxxxx	2018-06-11	Heart center	12	xxxxxx		A	52	4.3	61.8	33.2	4.5	0.2	0.3	2.66	1.43	0.19	0.01	0.01	4.29	133	0.4	92.6	30.9	334
xxxxxxx	10931	xxx	Uygur	man	46	168	75	26.5731	3.85	5.3	1.58	4.2	0.76	2.89	200.9	6	73	258	120	80	86	1	middle school		xxxxxxxxxxx	2018-06-12	Heart center	38	xxxxxx		AB	76	8.9	58.7	31.9	6.8	2.1	0.5	5.22	2.84	0.61	0.19	0.04	5.3	161	0.46	87	30.4	350
xxxxxxx	10966	xxx	Han	man	64	170	70	24.2215	5.06	5.24	0.75	3.35	1.3	1.81	173.3	4.9	63	272	120	80	1.11	0.63	middle school	retire	xxxxxxxxxxx	2018-06-12	Heart center	42	xxxxxx	106		58	4.6	67.6	21.8	8.7	1.8	0.1	3.11	1	0.4	0.08	0	0.95	135	0.4	101.8	34.1	335
xxxxxxx	10943	xxx	Han	man	43	180	82	25.3086	12.4	7.67	3.76	3.06	0.56	1.86	260.2	3.98	46.9	198.9			0.78	0.65	undergraduate college	cadre	xxxxxxxxxxx	2018-06-12	Heart center	11	xxxxxx	100	B	80	7.52	57.6	32.2	7.7	2.4	0.1	4.33	2.42	0.58	0.18	0.01	5.26	155	0.47	88.4	29.5	333
xxxxxxx	10973	xxx	Uygur	woman	67	156	57	23.4221	4.99	5.23	1.52	3.34	0.7	2.11	90.6	4.9	62	237	130	70	0.79	0.82	Secondary specialized school	farmer	xxxxxxxxxxx	2018-06-13	Heart center	28	xxxxxx	70		80	7.4	71.3	20.5	5.3	2.9	0	5.28	1.52	0.39	0.21	0	3.98	116	0.35	86.6	29.1	336
xxxxxxx	10962	xxx	Han	man	49	168	65	23.03	5.32	5.87	1.46	3.9	0.82	2.59	82.7	4.8	87	354	180	110	0.84	0.92	middle school		xxxxxxxxxxx	2018-06-13	Heart center	39	xxxxxx	90		70	5.24	64.8	23.5	9.4	1.9	0.4	3.4	1.23	0.49	0.1	0.02	5.11	154	0.46	90.4	30.1	333
xxxxxxx	10944	xxx	Han	man	73	168	72	25.5102	4.23	5.8	0.96	3.92	1.2	2.51		5.6	103	382			1.2	0.89	Secondary specialized school	retire	xxxxxxxxxxx	2018-06-13	Heart center	31	xxxxxx	83		59	8.3	68.5	22.4	5.7	2.6	0.8	5.69	1.86	0.07	0.22	0.07	4.44	149	0.3	0.43	96.7	33.6
xxxxxxx	10954	xxx	Han	man	76	180	54	16.6667	3.8	5.52	0.56	3.54	1.87	1.59	117.7	5.5	55	220			1.27	0.56	Secondary specialized school		xxxxxxxxxxx	2018-06-13	Heart center	1	xxxxxx	85	O	78	4.6	52.9	37.5	9	0.3	0.3	2.43	1.73	0.41	0.01	0.01	3.7	121	0.38	101.8	32.7	322
xxxxxxx	10971	xxx	Han	man	51	176	85	27.4406	4.45	5.35	3.11	5.54	0.88	3.81	109.7	5	91	370	160	110	0.83	1.34	middle school	staff	xxxxxxxxxxx	2018-06-14	Heart center	38	xxxxxx	123		75	5.1	64.4	28.3	4.9	2.2	0.2	3.28	1.44	0.25	0.11	0.01	5.32	163	0.5	93.2	30.6	328
xxxxxxx	10969	xxx	Han	man	67	172	66	22.3094	5.86	4.4	1.68	3.6	0.92	1.6	288.4	5.57	67.07	332	140	70	1.12	0.76	middle school	farmer	xxxxxxxxxxx	2018-06-14	Heart center	17	xxxxxx	96		70	6.09	62.5	29.6	5.9	1.8	0.2	3.81	1.8	0.36	0.11	0.01	4.65	135	0.42	89.5	29	325
xxxxxxx	10951	xxx	Han	woman	56	165	55	20.202	4.7	5.4	1.66	2.79	0.97	2.45	76.6	4.2	57	244			0.84	0.86	Secondary specialized school	farmer	xxxxxxxxxxx	2018-06-14	Heart center	32	xxxxxx			72	4.4	41.7	51.5	5.4	0.9	0.5	1.83	2.27	0.24	0.04	0.02	5.07	156	0.47	93.5	30.9	331
xxxxxxx	10950	xxx	Han	woman	56	165	55	20.202	4.7	5.4	1.66	3.79	0.97	2.45	76.8	4.2	57	244			0.84	0.86	middle school	farmer	xxxxxxxxxxx	2018-06-14	Heart center	32	xxxxxx			72	4.4	41.7	51.5	5.4	0.9	0.5	1.83	2.27	0.24	0.04	0.02	5.07	156	0.47	93.5	30.9	331
xxxxxxx	10939	xxx	Uygur	man	69	160	68	26.5625	6.89	5.78	1.88	2.69	0.6	1.42	209.1	4.4	79	247			0.66	0.66	undergraduate college	not in details	xxxxxxxxxxx	2018-06-14	Heart center	24	xxxxxx	95	B	81	6.6	69.4	19.3	8.8	2.4	0.1	4.58	1.27	0.58	0.16	0.01	4.51	146	0.43	94.3	32.3	342
xxxxxxx	10968	xxx	Uygur	man	72	172	76	25.6896	6.53	4.4	1.25	3.69	1.39	1.58	312.3	6.76	94.2	231	200	150	1.44	0.64	middle school	retire	xxxxxxxxxxx	2018-06-14	Heart center	19	xxxxxx	113		76	4.72	61	36.7	0	1.9	0.4	2.88	1.73	0	0.09	0.02	4.46	129	0.41	92.8	28.9	312
xxxxxxx	10952	xxx	Uygur	woman	57	165	65	23.8751	6.71	6.13	2.14	3.48	0.78	1.97	13	6.7	81	473	145	90	0.83	0.79	middle school	office worker	xxxxxxxxxxx	2018-06-15	Heart center	42	xxxxxx			80	6.2	58.4	32.7	7.3	1.5	0.1	3.62	2.03	0.45	0.09	0.01	3.58	104	0.32	90.6	29.2	322
xxxxxxx	10978	xxx	Han	man	67	169	73	25.5593	5.05	5.58	2.04	3.54	0.83	1.97	23.1	4	87	247	140	80	0.92	0.72	middle school	worker	xxxxxxxxxxx	2018-06-15	Heart center	41	xxxxxx	110		69	6.8	61.5	30.2	6.4	1.9	0	4.18	2.05	0.44	0.13	0	4.47	154	0.44	98.6	34.4	349
xxxxxxx	10948	xxx	Han	man	63	165	68	24.977	4.04	4.99	0.87	3.47	0.99	2.13	73.9	5	57	291			0.84	0.65	middle school	retire	xxxxxxxxxxx	2018-06-15	Heart center	8	xxxxxx			68	6.7	69.8	23.5	5.6	0.7	0.4	4.68	1.57	0.38	0.05	0.03	4	127	0.39	97.5	31.7	325
xxxxxxx	10974	xxx	Han	woman	69	160	85	33.2031	6.74	5.2	2.34	4.44	0.93	3.03	180.3	5.15	68.9	279.6	120	80	1.06	1.1	middle school		xxxxxxxxxxx	2018-06-15	Heart center	44	xxxxxx	113		73	5.48	45.4	42.9	9.5	2	0.2	2.49	2.35	0.52	0.11	0.01	4.16	129	0.39	94.5	31	328
xxxxxxx	10967	xxx	Han	woman	59	158	56	22.4323	10.69	7.27	1.56	4.01	0.96	2.2	338.9	5.69	48.44	234	150	100	1.27	0.82	Junior college	retire	xxxxxxxxxxx	2018-06-16	Heart center	46	xxxxxx	70		73	5.68	60.4	28.2	8.5	2.5	0.4	3.43	1.6	0.48	0.14	0.02	4.11	113	0.36	86.4	27.5	318
xxxxxxx	10993	xxx	Han	man	52	172	64	21.6333	3.68	5.17	1.91	4.75	0.84	3.43	408	2	68	251			0.81	1.12	middle school	worker	xxxxxxxxxxx	2018-06-17	Heart center	7	xxxxxx	83	O	55	6.7	58.2	28.8	9.5	3	0.5	3.9	1.93	0.64	0.2	0.03	4.34	148	0.43	99.3	34	343
xxxxxxx	10991	xxx	Han	woman	51	154	60	25.2994	5.03	4.9	1.47	4.17	0.81	2.54	449.4	5.85	82	340.6			1.35	0.62	Junior college	teacher	xxxxxxxxxxx	2018-06-17	Heart center	52	xxxxxx	70	B	76	5.81	67.7	24.1	6.9	1	0.3	3.93	1.4	0.4	0.06	0.02	3.77	113	0.37	97.1	30	309
xxxxxxx	11035	xxx	Han	woman	47	163	76	28.6048	5.45	5.28	2.1	4.87	1.01	3.26	81.5	2.8	62	327			0.88	0.97	undergraduate college	office worker	xxxxxxxxxxx	2018-06-18	Heart center	7	xxxxxx	100	A	72	6.3	59.7	29.4	6.6	3.7	0.6	3.76	1.85	0.42	0.23	0.04	4.51	141	0.4	89.2	31.3	351
xxxxxxx	11118	xxx	Han	man	75	168	64	22.6757	4.46	4.91	0.98	4.83	1.28	3.13	119.5	5.6	63	296	120	60	1.06	1.07	Secondary specialized school	retire	xxxxxxxxxxx	2018-06-18	Heart center	49	xxxxxx	80	A	82	4.95	75.2	11.7	11.7	1.4	0	3.72	0.58	0.07	0	4.11	1.32	0.38	0.38	92.9	32.1	346
xxxxxxx	11032	xxx	Han	man	59	165	65	23.8751	10	7.47	0.95	4.43	1.02	2.67	191.5	6.04	72	325.1	183	104	1.43	0.62	middle school	cadre	xxxxxxxxxxx	2018-06-19	Heart center	48	xxxxxx	87	B	84	7.41	67.5	24.4	7	0.8	0.3	5	1.81	0.52	0.06	0.02	4.93	141	0.43	87.8	28.6	326
xxxxxxx	10996	xxx	Uygur	man	43	170	79	27.3356	3.92	5.05	2.54	4.15	0.73	2.48	125.9	4.5	44	249			0.79	0.88	Secondary specialized school	farmer	xxxxxxxxxxx	2018-06-19	Heart center	20	xxxxxx	97	O	84	9.4	66.7	23.8	8.2	1.2	0.1	6.27	2.24	0.77	0.11	0.01	4.2	135	0.41	97.5	32.1	330
xxxxxxx	11012	xxx	Uygur	woman	61	160	70	27.3437	6.01	5.1	5.76	2.89	0.74	1.26		6.61	48.9	250.5					middle school	farmer	xxxxxxxxxxx	2018-06-20	Heart center	13	xxxxxx	92		71	5.17	49.7	40	8.9	1.2	0.2	2.57	2.07	0.46	0.06	0.01	3.97	114	0.36	91.4	28.7	314
xxxxxxx	10940	xxx	Han	man	41	165	73	26.8136	3.73	5.23	1.18	5	0.97	3.49	252.8	5.7	75	395			0.83	1.09	Secondary specialized school	office worker	xxxxxxxxxxx	2018-06-20	Heart center	38	xxxxxx			72	6.9	45.8	45.2	5.7	2.7	0.6	3.16	3.12	0.39	0.19	0.04	5.43	158	0.49	91.6	29.7	324
xxxxxxx	10999	xxx	Uygur	man	38	162	57	21.7193	5.88	4.5	0.89	3.95	1.04	2.03	212.6	7.9	69.43	372			1.32	0.62	Junior college	teacher	xxxxxxxxxxx	2018-06-20	Heart center	29	xxxxxx	83	A	75	4.77	53.1	37.9	6.9	1.9	0.2	2.53	1.81	0.33	0.09	0.01	4.83	137	0.43	89.9	28.4	316
xxxxxxx	11015	xxx	Han	man	60	169	70	24.5089	6.59	4.9	2.24	7.39	0.61	5.65	344.2	5.22	80.7	313.1	135	80	1.26	1.52	middle school	retire	xxxxxxxxxxx	2018-06-21	Heart center	37	xxxxxx	100		70	10.1	75.7	19	3.7	1.2	0.4	7.65	1.92	0.37	0.12	0.04	3.67	116	0.4	107.9	31.6	293
xxxxxxx	11033	xxx	Han	man	50	170	79	27.3356	6.73	5.4	3.41	8.36	1.15	5.77	98.4	5.05	56.6	321.9			1.74	1.57	Junior college	office worker	xxxxxxxxxxx	2018-06-21	Heart center	16	xxxxxx	100	AB	80	6.1	54.4	36.8	7.1	1.1	0.6	3.32	2.24	0.43	0.07	0.04	4.83	144	0.44	91.5	29.8	326
xxxxxxx	11022	xxx	Han	woman	60	154	48	20.2395	6.22	5.4	7.46	5	0.52	1.92	528.5	5.22	72.8	317.3	90	65	1.32	0.91	middle school	farmer	xxxxxxxxxxx	2018-06-21	Heart center	27	xxxxxx	60		76	8.09	54.5	34	5.6	5.8	0.1	4.41	2.75	0.45	0.47	0.01	4.81	137	0.43	90	28.5	316
xxxxxxx	11039	xxx	Uygur	man	63	163	66	24.841	10.65	6.97	2.28	3.62	0.33	2.4	754.8	6.41	87.6	258.5			0.83	0.79	Secondary specialized school	farmer	xxxxxxxxxxx	2018-06-21	Heart center	44	xxxxxx	86	AB	100	4.69	59.3	30.7	7.9	1.9	0.2	2.78	1.44	0.37	0.09	0.01	4.79	130	0.41	84.8	27.1	320
xxxxxxx	11036	xxx	Uygur	man	47	173	90	30.0712	9.39	7.17	1.45	3.52	0.78	1.89	434.7	2.17	87	357.3	180	120	1.05	0.68	Junior college	office worker	xxxxxxxxxxx	2018-06-21	Heart center	17	xxxxxx	105	O	63	9.45	58.6	33.9	6.1	1	0.4	5.54	3.2	0.58	0.09	0.04	5.53	159	0.49	88.4	28.8	325
xxxxxxx	11111	xxx	Han	woman	53	162	62	23.6244	5.04	5.2	0.93	3.87	0.75	2.46	268	3.54	45.2	293.5	150	100	1.27	0.71	middle school	retire	xxxxxxxxxxx	2018-06-25	Heart center	7	xxxxxx	70	O	66	4.46	71.1	17.7	8.7	2.5	0	3.17	0.79	0.39	0.11	0	3.8	109	0.34	88.2	28.7	325.1
xxxxxxx	11103	xxx	Uygur	woman	64	166	69	25.0399	3.98	5.16	1.89	4.69	1.14	2.92	203	6.1	76	227	190	120	1.04	1.01	middle school	retire	xxxxxxxxxxx	2018-06-25	Heart center	8	xxxxxx	72	B	72	9.2	63	29.4	6	1.1	0.5	5.8	2.7	0.55	0.1	0.05	4.46	136	0.4	89.6	30.5	341
xxxxxxx	11088	xxx	Uygur	woman	45	158	71	28.441	5.16	5.04	1.44	3.6	0.82	2.16	262.4	4	59	289			0.82	0.58	middle school	retire	xxxxxxxxxxx	2018-06-26	Heart center	39	xxxxxx	102		70	7.4	52.7	37.1	8.9	1.3	0	3.9	2.75	0.66	0.1	0	3.87	120	0.38	97.8	31.1	318
xxxxxxx	11117	xxx	Uygur	man	59	176	84	27.1178	5.22	5.29	5.31	5.09	0.7	2.54	95.6	5.7	76	371	160	100	0.87	1.05	undergraduate college	retire	xxxxxxxxxxx	2018-06-28	Heart center	42	xxxxxx	86	O	75	6.2	52.6	40	6.3	1.1	0	3.26	2.48	0.39	0.07	0	4.75	147	0.43	90.8	30.9	341
xxxxxxx	11112	xxx	Han	woman	73	168	70	24.8016	5.7	5	1.99	3.76	0.57	1.95	225.7	4.37	63.2	223.4	110	70	1.21	0.66	middle school	retire	xxxxxxxxxxx	2018-06-28	Heart center	14	xxxxxx	68	A	81	5.09	52.1	37.3	9	1.4	0.2	2.65	1.9	0.46	0.07	0.01	3.93	117	0.36	90.3	29.8	330
xxxxxxx	11110	xxx	Han	man	64	170	75	25.9516	5.15	5.47	4.49	4.81	0.71	2.3	110	5.7	79	414	110	80	0.98	0.97	middle school	retire	xxxxxxxxxxx	2018-06-28	Heart center	33	xxxxxx	86	A	100	8.2	53.1	36.5	7.2	2.7	0.5	4.35	2.99	0.59	0.22	0.04	5.17	157	0.48	93.1	30.3	325
xxxxxxx	11108	xxx	Uygur	man	67	172	66	22.3094	3.64	4.8	0.82	2.7	0.74	1.51	65.2	5.7	45	419	180	120	0.7	0.66	Secondary specialized school	farmer	xxxxxxxxxxx	2018-06-28	Heart center	190011	xxxxxx	82	B	84	6.4	61.9	30.4	6.9	0.5	0.3	3.96	1.95	0.44	0.03	0.02	4.1	126	0.38	93.6	30.8	328
xxxxxxx	11113	xxx	Uygur	woman	54	163	53	19.9481	6.46	4.9	0.74	3.45	0.32	2.74	108.3	6.17	73.7	520.4	185	110	0.48	0.74	illiterate	farmer	xxxxxxxxxxx	2018-06-29	Heart center	18	xxxxxx	68	A	80	6.77	55.4	31.5	11.5	1.6	0	3.75	2.13	0.78	0.11	0	4.48	123	0.38	85.5	27.5	321
xxxxxxx	11148	xxx	Han	woman	61	165	76	27.9155	5.55	4.5	1.11	4.23	1.18	2.51	136.2	5.47	45	279	150	120	1.46	0.81	illiterate	retire	xxxxxxxxxxx	2018-07-01	Heart center	38	xxxxxx	70	B	72	5.81	68.4	21	7.1	3.3	0.2	3.97	1.22	0.41	0.19	0.01	4.1	122	0.36	85	29	342
xxxxxxx	11109	xxx	Uygur	man	64	171	80	27.3588	6.64	4.2	1.61	3.19	0.63	2.19	142.4	7.08	73.9	339.9	120	62	1.02	0.74	middle school	farmer	xxxxxxxxxxx	2018-07-02	Heart center	21	xxxxxx	84	A	65	6.34	48.1	41.3	7.1	3.3	0.2	3.055	2.62	0.45	0.21	0.01	4.25	139	0.41	96.7	32.7	338
xxxxxxx	11141	xxx	Han	woman	70	162	65	24.7676	5.32	5.4	1.31	5.34	1.62	3.22	126.5	5.3	69	300	168	92	1.39	0.9	middle school	retire	xxxxxxxxxxx	2018-07-02	Heart center	35	xxxxxx	70	A	60	4.4	43.9	42	10.9	2.8	0.4	1.93	1.85	0.48	0.12	0.02	3.67	114	0.343	93.3	31	332
xxxxxxx	11125	xxx	Han	woman	63	160	70	27.3437	7.37	7.37	3.43	6.01	1.27	4.13		2.51	52.1	225.9	125	75			middle school	retire	xxxxxxxxxxx	2018-07-02	Heart center	15	xxxxxx		B	84	5.89	69.5	23.9	5.4	1	0.2	4.09	1.41	0.32	0.06	0.01	4.11	117	0.35	84.7	28.5	336
xxxxxxx	11134	xxx	Uygur	woman	33	170	81	28.0277	12.76	7.47	0.65	7.06	1.53	4.83		5.02	46.8	218.1	105	63			middle school	worker	xxxxxxxxxxx	2018-07-03	Heart center	10	xxxxxx	79	O	92	6.86	57.6	33.1	6.3	2.9	0.1	3.95	2.27	0.43	0.2	0.01	4.75	117	0.37	78.3	24.6	315
xxxxxxx	11145	xxx	Uygur	woman	54	170	81	28.0277	5.37	4.92	1.27	5.19	1.12	3.48	71	4.3	44	294	190	140	0.99	1.18	middle school	farmer	xxxxxxxxxxx	2018-07-03	Heart center	19	xxxxxx	80	O	103	12.3	73.8	17.2	8.1	0.8	0.1	9.08	2.12	1	0.1	0.01	4.65	128	0.391	84.3	27.6	328
xxxxxxx	11142	xxx	Han	man	45	174	78	25.763	4.56	5.43	2.32	4.56	0.95	2.76	111.2	7	59	322	180	100	0.95	0.81	middle school		xxxxxxxxxxx	2018-07-03	Heart center	1	xxxxxx	84	B	64	4.8	52	37.6	8.6	1.1	0.7	2.5	1.8	0.41	0.05	0.03	4.91	148	0.432	88	30.1	342
xxxxxxx	11153	xxx	Han	man	51	173	69	23.0546	4.39	5.25	1.58	4.98	1.26	2.79	168.3	5.2	62	325.21	160	104	1.11	1.03	middle school	worker	xxxxxxxxxxx	2018-07-04	Heart center	46	xxxxxx	80	B	72	6	43	43.9	8.2	4.2	0.7	2.58	2.63	0.49	0.25	0.04	4.48	149	0.436	97.4	33.2	341
xxxxxxx	11150	xxx	Uygur	woman	60	166	80	29.0318	3.69	5.29	1.32	4.86	1.15	3.03	94.7	5.8	87	273	180	140	1.03	0.93	Secondary specialized school	retire	xxxxxxxxxxx	2018-07-04	Heart center	3	xxxxxx	72	B	68	3.9	61	26.2	7.9	4.4	0.5	2.38	1.02	0.31	0.17	0.02	4.14	135	0.385	93.2	32.7	351
xxxxxxx	11164	xxx	Han	man	50	177	89	28.4082	5.61	5.4	1.78	4.41	1.11	2.49	84.9	3.5	84	412			1	0.86	undergraduate college	civil servant	xxxxxxxxxxx	2018-07-05	Heart center	24	xxxxxx	102		77	7.13	48.6	34.8	8.6	7.6	0.4	3.47	2.48	0.61	0.54	0.03	3.89	127	0.37	94.9	32.6	344
xxxxxxx	11156	xxx	Han	man	55	180	106	32.716	5.58	4.9	1.6	4.03	0.94	2.52	167.8	3.45	65.2	391.3	134	82	0.88	0.86	Secondary specialized school	farmer	xxxxxxxxxxx	2018-07-05	Heart center	38	xxxxxx	90	O	60	7.48	53.2	35.3	9.6	1.6	0.3	3.98	2.64	0.72	0.12	0.02	4.25	145	0.42	98.6	34.1	346
xxxxxxx	11300	xxx	Uygur	man	61	165	62	22.7732	4.09	4.85	1.32	3.52	0.86	1.98	478.1	5	49	320			0.9	0.71	Secondary specialized school	farmer	xxxxxxxxxxx	2018-07-17	Heart center	2	xxxxxx			76	6.05	56.24	76	6.1	1.5	0.2	3.4	2.18	0.37	0.09	0.01	4.55	151		96.5	33.2	344
xxxxxxx	11299	xxx	Uygur	man	70	165	60	22.0386	3.95	5.36	1.33	4.41	0.76	3.2	165	5.7	74	255			0.89	1.28		farmer	xxxxxxxxxxx	2018-07-20	Heart center	18	xxxxxx			68	7.9	68.9	26.2	8.2	1.2	0.5	5.05	2.07	0.65	0.09	0.04	4.53	145	0.439	96.8	37.9	330
xxxxxxx	11323	xxx	Uygur	man	52	181	82	25.0298	5.5	5.85	2.66	3.44	0.88	1.87	101.4	4	74	191			1.23	0.89	undergraduate college	cadre	xxxxxxxxxxx	2018-07-20	Heart center	17	xxxxxx	94	B	78	7.1	57	31		1.7	0.5	4.05	2.2	0.69	0.12	0.24	4.69	156	0.443	94.3	33.3	353
xxxxxxx	11571	xxx	Uygur	man	65	170	60	20.7612	4.92	4.7	0.89	3.31	0.93	2.15	219.7	60.2	78	197.9	106	65	1.46	0.81	middle school	retire	xxxxxxxxxxx	2018-07-21	Heart center	26	xxxxxx	95	B	56	3.44	42.7	45.1	9.6	2	0.6	1.47	1.55	0.33	0.07	0.02	4.54	141	0.41	90.7	31.1	342
xxxxxxx	11305	xxx	Uygur	man	50	178	117	36.9272	8.75	7.51	3.16	4.65	0.16	2.54	455.3	1.9	78	435	200	150	0.94	1.31	middle school	cadre	xxxxxxxxxxx	2018-07-22	Heart center		xxxxxx	106	B	90	7.1	71.7	20.4	6.5	1.1	0.3	5.09	1.45	0.46	0.08	0.02	4.92	141	0.398	92.8	32.9	354
xxxxxxx	11306	xxx	Han	man	42	179	81	25.2801	4.09	5.53	1.49	2.27	0.96	1.29	108.7	4.9	73	394			0.89	0.5	undergraduate college	teacher	xxxxxxxxxxx	2018-07-23	Heart center	30	xxxxxx	96	B	78	5.9	59	29.2	7.8	4	0.4	3.48	1.72	0.46	0.24	0	4.49	166	0.482	97.5	33.6	345
xxxxxxx	11309	xxx	Han	man	40	165	61	22.4059	6.88	5	2	3.95	1.06	2.1	285.7	6.24	90.2	299			1.99	0.64	Junior college		xxxxxxxxxxx	2018-07-23	Heart center	31	xxxxxx	80	B	64	3.72	62.9	29	7	0.8	0.3	2.34	1.08	0.26	0.03	0.01	4.46	146	0.41	92.2	32.7	355
xxxxxxx	11330	xxx	Uygur	man	63	177	94	30.0041	3.78	5.3	3.8	4.32	0.7	2.49	153.2	4.5	80	374	180	125	0.83	0.96	middle school		xxxxxxxxxxx	2018-07-23	Heart center	5	xxxxxx	106	A	68	5.8	53	40.4	6.2	0.3	0.5	3.07	2.34	0.36	0.02	0.01	4.16	132	0.388	93.3	31.6	399
xxxxxxx	11331	xxx	Uygur	man	42	176	99	31.9602	4.71	4.8	0.96	3.17	0.9	1.63	304.3	6.63	92.1	423.5			1.41	0.75	middle school		xxxxxxxxxxx	2018-07-24	Heart center	4	xxxxxx	107	O	120	20.9	95.1	19.7	4.4	0.1	0.7	15.7	4.12	0.92	0.02	0.15	5.9	188	0.571	96.8	31.9	329
xxxxxxx	11314	xxx	Han	man	72	178	75	23.6713	5.05	5	1.06	4.77	1.24	2.89	193.7	7.55	87.64	340			1.71	0.95	Secondary specialized school	farmer	xxxxxxxxxxx	2018-07-25	Heart center	39	xxxxxx	93	B	58	9.5	54.2	26.3	8.7	10.5	0.3	5.15	2.5	0.83	1	0.03	3.86	126	0.38	99.5	32.6	328
xxxxxxx	11322	xxx	Uygur	man	47	167	57	20.4382	4.34	5	1.96	3.05	0.9	1.29		4.41	78.93	291	160	140			undergraduate college		xxxxxxxxxxx	2018-07-26	Heart center	16	xxxxxx	80	A	72	7.6	53.9	36	7.5	2.2	0.4	4.1	2.74	0.57	0.17	0.03	5.03	115	0.479	94.8	32.7	345
xxxxxxx	11478	xxx	Uygur	woman	36	164	58	21.5645	4.17	5.16	0.5	2.91	1.15	1.59	122.5	4.7	50	160	100	60	1.19	0.48	Secondary specialized school	family members	xxxxxxxxxxx	2018-08-06	Heart center	3	xxxxxx	68	B	84	5.4	52.1	37.9	8.7	1	0.3	2.81	2.05	0.47	0.05	0.3	4.29	127	0.376	87.6	29.6	338
xxxxxxx	11486	xxx	Uygur	man	49	177	74	23.6203	5.02	4.97	2.19	3.06	0.3	1.86	125.4	2.9	58	223	135	95	0.52	0.63	Secondary specialized school	farmer	xxxxxxxxxxx	2018-08-06	Heart center	45	xxxxxx		O	80	8.1	70.9	17.9	10.3	0.4	0.5	5.74	1.45	0.83	0.03	0.04	4.43	134	0.397	89.6	30.1	336
xxxxxxx	11541	xxx	Han	man	60	165	84	30.854	4.9	5.15	1.6	5.59	1.65	3.71	254.7	4	67	229	122	78	1.6	1	middle school	retire	xxxxxxxxxxx	2018-08-08	Heart center	24	xxxxxx			74	6.7	43.7	42	8.6	5.2	0.5	2.93	2.81	0.58	0.35	0.03	5.05	171	0.512	101.4	33.8	334
xxxxxxx	11509	xxx	Uygur	woman	55	160	64	25		4.88	0.73	2.77	0.82	1.3					110	70			middle school	farmer	xxxxxxxxxxx	2018-08-08	Heart center	30	xxxxxx	76		75	5.9	49	34.1	13.9	2.4	0.6	2.89	2.01	0.82	0.14	0.04	4.51	136	0.395	87.5	30.1	344
xxxxxxx	11519	xxx	Han	woman	52	165	70	25.7117	5.2	5.43	0.62	5.54	1.74	3.3	155.4	6.2	56	242	131	78	1.6	0.86	Junior college	office worker	xxxxxxxxxxx	2018-08-09	Heart center	42	xxxxxx			76	6.9	55.4	37.2	6.2	0.7	0.5	3.82	2.57	0.43	0.05	0.03	4.11	130	0.381	92.7	31.5	340
xxxxxxx	11483	xxx	Uygur	woman	62	168	73	25.8645	4.72	5.24	1.32	3.28	1.29	1.58	175.1	3	55	137	124	78	1.54	0.6	Secondary specialized school		xxxxxxxxxxx	2018-08-09	Heart center	14	xxxxxx	69	O	70	7.3	61	29.8	7.3	0.9	1	4.45	2.18	0.53	0.07	0.07	3.83	116	0.343	89.4	30.3	339
xxxxxxx	11531	xxx	Uygur	man	59	167	66	23.6652	5.15	4.9	1.22	4.94	1.21	3.32	1168.8	6.04	75.1	389.4	140	90	1.62	0.97	Secondary specialized school	farmer	xxxxxxxxxxx	2018-08-09	Heart center	30	xxxxxx	76		66	7.43	50.6	38.1	6.3	4.6	0.4	3.76	2.83	0.47	0.34	0.03	5.34	151	0.46	96.7	28.3	326
xxxxxxx	11511	xxx	Han	man	48	172	79	26.7036	4.27	5.11	1.24	7.5	0.81	1.34	221.4	5.2	86	293	133	95	1.07	0.38	middle school		xxxxxxxxxxx	2018-08-09	Heart center	37	xxxxxx	96		70	9	62.2	30.2	7	4	2	5.6	2.72	0.63	0.04	0.02	4.67	148	0.439	94	31.8	338
xxxxxxx	11495	xxx	Han	woman	44	167	70	25.0995	5.14	4.8	0.59	4.11	1.72	2.46	74.2	3.96	54.6	214.1	110	74	1.71	0.7	Junior college	accounting	xxxxxxxxxxx	2018-08-09	Heart center	27	xxxxxx	86		74	6.61	67.9	25.1	4.8	2	0.2	4.49	1.66	0.32	0.13	0.01	4.35	131	0.4	91.7	30.1	328
xxxxxxx	11513	xxx	Han	woman	62	165	65	23.8751	5.97	5.62	1.98	4.45	1.38	2.47	96.4	4.4	49	243			1.65	0.54	Secondary specialized school	farmer	xxxxxxxxxxx	2018-08-09	Heart center	20	xxxxxx			62	4.5	48.6	42.8	6.8	1	0.8	2.19	1.93	0.31	0.05	0.04	3.76	124	0.368	97.7	33.1	338
xxxxxxx	11559	xxx	Uygur	man	60	165	75	27.5482	5.36	4.9	1.88	2.46	0.62	1.17	103.4	5.86	65	296.2			1.35	0.69	middle school	retire	xxxxxxxxxxx	2018-08-10	Heart center	33	xxxxxx			80	7.17	67.7	21.3	8.2	2.2	0.6	4.85	1.53	0.59	0.16	0.04	4.41	125	0.37	83.9	28.3	338
xxxxxxx	11518	xxx	Uygur	man	44	165	85	31.2213	4.73	5.21	1.01	5.06	0.69	3.71	443.8	6.6	95	226	120	80	0.87	1.07	undergraduate college	policeman	xxxxxxxxxxx	2018-08-10	Heart center	43	xxxxxx			58	6.9	54.4	35.1	8.1	1.7	0.7	3.75	2.42	0.56	0.12	0.05	4.88	158	0.467	95.6	32.4	338
xxxxxxx	11547	xxx	Han	man	71	165	75	27.5482	3.9	5.1	0.84	2.98	0.88	1.84	129.2	6	80	305			0.89	0.52	undergraduate college	retire	xxxxxxxxxxx	2018-08-13	Heart center	15	xxxxxx			70	5.3	48	40.6	6.9	3.6	0.9	2.54	2.15	0.37	0.19	0.05	3.79	129	0.383	101.2	34.2	338
xxxxxxx	11551	xxx	Han	woman	46	165	64	23.5078	4.87	5.39	1.54	5.33	1.36	3.62	99.6	7	46	233	110	60	1.5	0.71	undergraduate college	teacher	xxxxxxxxxxx	2018-08-13	Heart center	40	xxxxxx			69	6.8	48	38.1	8.4	4.7	0.8	3.26	2.59	0.57	0.32	0.05	4.47	151	0.43	96.3	33.7	350
xxxxxxx	11538	xxx	Han	woman	78	168	72	25.5102	4.01	5.19	1.61	4.2	0.82	2.6	157.7	4.6	59	348			1.18	0.6	middle school	retire	xxxxxxxxxxx	2018-08-13	Heart center	2	xxxxxx	79		60	9.6	76.5	16.1	6.5	0.8	0.1	7.34	1.55	0.62	0.08	0.01	4.16	136	0.406	97.5	32.8	336
xxxxxxx	11561	xxx	Uygur	man	46	165	63	23.1405	4.31	5.24	4.92	4.74	0.68	2.39	307.3	5.4	66	278			0.95	0.38	Junior college	cadre	xxxxxxxxxxx	2018-08-14	Heart center	1	xxxxxx			75	5.7	54.1	33.3	10.2	1.6	0.8	3.8	1.7	0.58	0.09	0.05	4.56	160	0.46	101	35.1	348
xxxxxxx	11598	xxx	Han	woman	70	165	86	31.5886	5.9	4.9	0.65	4.24	1.04	2.53	171.1	8.91	95.7	442.9	200	150	1.69	0.81	Secondary specialized school	retire	xxxxxxxxxxx	2018-08-14	Heart center	28	xxxxxx			58	5.51	61.5	26	8.9	3.6	0	3.39	1.43	0.49	0.2	0	3.52	108	0.33	94.9	30.7	323
xxxxxxx	11567	xxx	Uygur	man	60	167	71	25.4581	4.25	5.16	1.01	3.52	0.84	2.35	276.8	5.3	58	218	130	80	1	0.46		retire	xxxxxxxxxxx	2018-08-15	Heart center	24	xxxxxx	79	B	88	7	62.5	24.6	11.7	0.8	0.4	4.38	1.72	0.82	0.06	0.03	4.93	148	0.436	88.4	30	340
xxxxxxx	11593	xxx	Uygur	man	57	165	60	22.0386	4.6	5.17	1.2	4.84	1.37	3.01	129.6	8.4	66	331	110	70	1.48	0.75	Secondary specialized school	farmer	xxxxxxxxxxx	2018-08-15	Heart center	5	xxxxxx			60	7.2	60	29.9	7.1	2.7	0.3	4.32	2.15	0.51	0.19	0.02	4.58	137	0.416	90.9	29.8	328
xxxxxxx	11637	xxx	Han	man	48	170	77	26.6436	9.7	8.44	2.3	4.53	0.87	3.1	104.5	5	61	326	120	80	1.17	0.84	undergraduate college	civil servant	xxxxxxxxxxx	2018-08-15	Heart center	2	xxxxxx	83	A	80	5.9	61.6	30.4	6.9	0.9	0.2	3.63	1.79	0.41	0.05	0.01	4.71	156	0.45	95.5	33.2	347
xxxxxxx	11614	xxx	Uygur	woman	53	154	60	25.2994	4.79	5.35	0.96	6.51	1.44	4.4	813.5	4.9	69	251	120	80	1.44	0.86	Junior college	civil servant	xxxxxxxxxxx	2018-08-16	Heart center	36	xxxxxx	82	O	80	7	67.4	18.7	8.4	5	0.5	4.72	1.31	0.59	0.35	0.04	4.59	146	0.421	91.7	31.8	346
xxxxxxx	20473	xxx	Han	man	51	160	72	28.125	4.98	5.2	2.46	3.72	1.19	2.31	171	4.7	64	326.2	100	70	1.32	0.87	Secondary specialized school	farmer	xxxxxxxxxxx	2018-08-18	Heart center	29	xxxxxx	112		83	7.32	67	23.1	8.6	1	0.3	4.9	1.69	0.63	0.07	0.02	4.51	143	0.415	92	31.7	345
xxxxxxx	11578	xxx	Uygur	man	53	165	86	31.5886	9.18	8.46	1.89	3.18	0.72	1.78	106	61	43	245	180	120	0.9	0.47	Junior college	retire	xxxxxxxxxxx	2018-08-19	Heart center	22	xxxxxx			80	6.3	59.9	28.6	8.5	3	0	3.77	1.8	0.54	0.17	0	4.71	145	0.412	87.6	30.7	351
xxxxxxx	11616	xxx	Uygur	woman	68	158	66	26.4381	5.89	5.14	3.81	3.82	0.81	1.81	401.8	3.9	45	392	120	80	1.09	0.56	middle school		xxxxxxxxxxx	2018-08-19	Heart center	41	xxxxxx	100	O	82	6.7	62.4	23.3	8.2	5.6	0.5	4.18	1.56	0.55	0.38	0.03	4.65	144	0.422	90.8	31.1	342
xxxxxxx	11653	xxx	Uygur	man	63	165	57	20.9366	7.79	7.67	1.67	3.42	0.48	2.56	157.2	5.75	64.6	330.2	170	120	1.43	0.88	Junior college		xxxxxxxxxxx	2018-08-19	Heart center	26	xxxxxx	80	AB	80	8.1	62.6	26.5	7.2	3	0.7	5.07	2.15	0.58	0.24	0.06	4.4	129	0.39	88.7	29.2	330
xxxxxxx	11632	xxx	Han	man	51	170	67	23.1834	4.49	5.31	1.59	4.46	0.95	3.19	113.3	4.4	74	515	110	90	1.03	0.7	middle school		xxxxxxxxxxx	2018-08-20	Heart center	20	xxxxxx	90	B	60	5.4	61.1	29.5	6.5	1.7	1.2	3.3	1.59	0.35	0.09	0.06	4.68	157	0.449	95.9	33.5	349
xxxxxxx	11607	xxx	Uygur	man	71	165	74.5	27.3646	7.64	7.47	4.38	4.21	0.66	3.15	204.8	5.46	68.5	346.9	180	90	1.55	1.04	Junior college	retire	xxxxxxxxxxx	2018-08-20	Heart center	21	xxxxxx			72	7.98	69	21.7	7.5	1.5	0.3	5.51	1.73	0.6	0.12	0.02	3.96	123	0.36	91.9	31.1	338
xxxxxxx	11648	xxx	Uygur	man	45	165	75	27.5482	4.37	5.13	2.36	5.34	0.96	3.52	154.1	4	65	447	190	120	1.05	0.95	middle school	civil servant	xxxxxxxxxxx	2018-08-21	Heart center	35	xxxxxx	86	A	72	7.7	65.8	27.4	4.3	2.4	0.1	5.07	2.11	0.33	0.18	0.01	4.5	146	0.434	96.5	38.5	336
xxxxxxx	11639	xxx	Han	man	50	169	63	22.0581	4.63	5.18	1.49	4.72	1.41	2.72	463.2	5.1	64	293	105	70	1.67	0.61			xxxxxxxxxxx	2018-08-21	Heart center	3	xxxxxx	76	O	68	8.7	48.7	44.9	4.1	1.3	1	4.24	3.91	0.36	0.11	0.09	5.01	154	0.458	91.5	30.7	336
xxxxxxx	11660	xxx	Uygur	woman	58	165	63	23.1405	4.6	5	1.26	4.23	0.81	2.58	112.8	7.3	56.03	285	150	110	1.65	0.97	Secondary specialized school	farmer	xxxxxxxxxxx	2018-08-22	Heart center	22	xxxxxx	76	B	70	8.61	63.5	28.2	6.7	1.3	0.3	5.47	2.43	0.58	0.11	0.03	4.27	119	0.36	85	27.9	328
xxxxxxx	11665	xxx	Uygur	man	67	165	52	19.1001	13.57	8.27	4.69	4.93	0.62	3.36	313.8	7.77	79	325.3			1.42	1.37	middle school	retire	xxxxxxxxxxx	2018-08-22	Heart center	33	xxxxxx	80	B	78	6.5	54.3	34	9.8	1.4	0.5	3.53	2.21	0.64	0.01	0.03	4.59	147	0.432	94.1	32.1	314
xxxxxxx	11658	xxx	Han	woman	59	170	90	31.1419	6.6	5.76	8.58	9.12	1.31	5.54	121.5	5.4	64	446	150	100	1.38	1.55	middle school	retire	xxxxxxxxxxx	2018-08-23	Heart center	7	xxxxxx	92	A	72	4.6	56.7	33.9	7.2	1.7	0.7	2.61	1.55	0.33	0.08	0.03	4.09	126	0.375	91.6	30.9	337
xxxxxxx	11674	xxx	Uygur	man	54	172	90	30.4218	7.62	8.27	1.26	6.6	1.24	4.74	119.3	5.2	68.12	291	135	85	1.26	1.22	Junior college	teacher	xxxxxxxxxxx	2018-08-23	Heart center	12	xxxxxx	86	O	78	5.07	45.5	41.2	10.3	2.6	0.4	2.31	2.09	0.52	0.13	0.02	4.7	131	0.4	86	27.9	324
xxxxxxx	11687	xxx	Han	woman	67	168	64	22.6757	6.25	5.1	0.91	4.24	0.96	3.04	63.8	3.1	48.1	193.2	165	100	1.8	1.09	Secondary specialized school	retire	xxxxxxxxxxx	2018-08-24	Heart center	21	xxxxxx	76	B	72	4.93	66.1	29	3.7	1	0.2	3.26	1.43	0.18	0.05	0.01	3.81	116	0.35	92.7	30.4	329
xxxxxxx	11655	xxx	Uygur	man	72	169	72	25.2092	4.53	5.23	1.21	2.11	0.84	1.32		5.44	82.25	317.27	130	70			middle school	retire	xxxxxxxxxxx	2018-08-24	Heart center	39	xxxxxx	86	A	68	4.1
xxxxxxx	11672	xxx	Uygur	man	45	170	74	25.6055	7.71	6.97	4.46	3.92	0.6	2.69	133.9	4.75	78.8	280.9	95	70	1.3	0.89	Secondary specialized school	farmer	xxxxxxxxxxx	2018-08-25	Heart center	34	xxxxxx	80	A	62	8.32	66.3	24.9	6.9	1.7	0.2	5.52	2.07	0.57	0.14	0.02	4.39	129	0.4	90.7	29.4	324
xxxxxxx	11692	xxx	Uygur	man	72	165	82	30.1194	4.48	5.26	0.94	4.16	1.44	2.5	78.7	7.2	18	427	120	70	1.34	0.68	undergraduate college	retire	xxxxxxxxxxx	2018-08-26	Heart center	44	xxxxxx			60	6.7	54.9	32	8.5	4	0.5	3.68	2.14	0.57	0.27	0.03	3.99	118	0.36	90	29.6	329
xxxxxxx	11696	xxx	Han	woman	54	165	65	23.8751	5.31	4.89	1.61	4.47	0.84	3.21	161	4.2	50	324	130	80	0.92	0.66	middle school	worker	xxxxxxxxxxx	2018-08-26	Heart center	12	xxxxxx			78	4.2	50.8	39.5	8.6	0.7	0.4	2.13	1.66	0.36	0.03	0.02	3.94	125	0.361	90.9	31.6	548
xxxxxxx	11684	xxx	Uygur	man	45	167	65	23.3067	4.78	5.18	4.16	5.72	0.92	3.71	159.7	6.1	69	440	130	75	1.26	0.97	undergraduate college	Professional and technical personnel	xxxxxxxxxxx	2018-08-27	Heart center	17	xxxxxx		O	73	6.1	52.7	32.1	9.4	5.6	0.2	3.21	1.96	0.57	0.34	0.01	4.3	140	0.409	95.1	32.7	343
xxxxxxx	11673	xxx	Han	man	46	169	75	26.2596	4.19	5	1.96	4.88	0.93	3.14	27	3.69	68	332	130	90	1.12	0.87	middle school		xxxxxxxxxxx	2018-08-27	Heart center	23	xxxxxx	94	B	76	12	74	18.4	6.8	0.5	0.3	8.88	2.21	0.82	0.06	0.04	5.23	170	0.478	91	32.5	355
xxxxxxx	11707	xxx	Han	man	81	165	81	29.7521	4.74	5.03	1.53	3.42	0.99	2.04	128	5.4	88	447			1.01	0.51	middle school	retire	xxxxxxxxxxx	2018-08-27	Heart center	21	xxxxxx			60	5.8	66.1	21.7	8	3.8	0.4	3.83	1.26	0.46	0.22	0.02	3.49	128	0.374	107	36.6	342
xxxxxxx	11701	xxx	Han	man	78	175	65	21.2245	4.79	5.03	1.09	3.05	1.13	1.6	316	6	47	193	160	100	1.49	0.48	middle school	retire	xxxxxxxxxxx	2018-08-28	Heart center	31	xxxxxx	84		75	6.2	68.3	23	7.5	1	0.2	4.23	1.43	0.47	0.06	0.01	4.2	138	0.409	97.4	33	338
xxxxxxx	11709	xxx	Uygur	man	61	170	58	20.0692	7.38	7.07	0.6	6.51	1.86	4.74		6.16	82.1	264.5					Secondary specialized school	farmer	xxxxxxxxxxx	2018-08-28	Heart center	22	xxxxxx	77	AB	74	7.2	60.8	25.3	9.4	3.6	0.9	4.38	1.82	0.68	0.26	0.06	4.13	131	0.391	94.7	31.8	335
xxxxxxx	11694	xxx	Han	man	58	179	102	31.8342	4.63	5.2	0.97	3.63	1.13	2.16	71.3	5.8	78	255	180	130	1.18	0.6	middle school	staff	xxxxxxxxxxx	2018-08-28	Heart center	47	xxxxxx	110	B	76	5.4	52.6	35.3	9.1	2.9	0.1	2.84	1.91	0.49	0.16	0.01	4.22	150	0.422	100	35.5	355
xxxxxxx	11702	xxx	Han	woman	64	154	65	27.4077	4.98	5.35	1.85	4.24	1.03	2.53	63.7	3.1	56	311			1.31	0.81	middle school	retire	xxxxxxxxxxx	2018-08-29	Heart center	36	xxxxxx	97	B	78	5	57.9	33.6	5.9	1.9	0.7	7.89	1.68	0.29	0.09	0.01	4.26	138	0.401	94.1	32.3	343
xxxxxxx	11711	xxx	Uygur	man	49	165	84	30.854	5.4	5.5	2.66	5.95	1.43	3.7	93.6	3.7	72	395			1.75	1.3	undergraduate college	civil servant	xxxxxxxxxxx	2018-08-30	Heart center	25	xxxxxx			76	11.6	60.9	30	6.8	1.9	0.4	7.06	3.48	0.79	0.22	0.05	4.76	164	0.461	96.7	34.3	355
xxxxxxx	11712	xxx	Han	woman	66	157	62	25.1532	4.42	5.47	3.86	3.88	0.77	2.03	109.5	5.5	50	281			1.21	0.83	illiterate	farmer	xxxxxxxxxxx	2018-08-30	Heart center	15	xxxxxx	92		78	6.2	60.4	29.6	8	1.5	0.5	3.74	1.84	0.5	0.09	0.03	4.2	135	0.382	91	32.3	355
xxxxxxx	11801	xxx	Han	man	48	170	72	24.9135	8.8	7.44	3.2	4.06	1.03	2.05	581	5.9	79	338	110	70	1.36	0.75	middle school	worker	xxxxxxxxxxx	2018-09-05	Heart center	12	xxxxxx	96	A	95	6.4	64.1	29.3	5.3	0.8	0.4	4.1	1.88	0.34	0.05	0.03	4.65	143	0.428	92.2	30.8	334
xxxxxxx	11815	xxx	Han	man	67	173	81	27.0641	7.3	8.39	0.82	4.02	1.07	2.62	517	6.3	80	379			1.28	0.81	Junior college	retire	xxxxxxxxxxx	2018-09-08	Heart center	22	xxxxxx	100		60	4.5	54.8	31.7	6.6	6.9	0	7.47	1.43	0.3	0.31	0	4.36	148	0.423	97	34	351
xxxxxxx	11800	xxx	Han	man	60	175	80	26.1224	5.36	5.17	2.12	3.63	0.81	2.2	156.5	7.4	103	345	110	80	1.15	0.65	middle school	retire	xxxxxxxxxxx	2018-09-08	Heart center	11	xxxxxx	100	B	72	5.5	52.7	33.1	9.2	4.3	0.7	2.9	1.82	0.51	0.24	0.04	4.7	149	0.43	91.6	31.7	347
xxxxxxx	11872	xxx	Han	woman	67	158	50	20.0288	3.98	5.27	0.63	4.36	1.61	2.33	347	3.2	53	188	190	105	1.58	0.71	middle school	worker	xxxxxxxxxxx	2018-09-09	Heart center	29	xxxxxx	65	B	72	3.6	49.4	39.9	8.1	1.9	0.7	1.78	1.44	1.29	0.09	0.03	3.85	135	0.388	100.7	35.1	349
xxxxxxx	11816	xxx	Uygur	woman	55	160	80	31.25	7.41	8.39	1.71	4.37	0.93	2.67	217	3.3	58	169	150	70	1.25	0.97	illiterate	retire	xxxxxxxxxxx	2018-09-11	Heart center	8	xxxxxx	115	A	65	7.1	4.9	47.8	7.8	2.9	0.6	2.9	3.39	0.55	0.4	0.09	4.02	134	0.388	96.5	33.5	347
xxxxxxx	11821	xxx	Uygur	man	52	165	74	27.1809	5.21	5.3	2.18	4.08	0.52	2.78	727.6	5	78	350	180	120	0.96	1.09	Junior college	cadre	xxxxxxxxxxx	2018-09-11	Heart center	33	xxxxxx			72	6.4	47.7	35.4	9.5	7.3	0.1	3.05	2.27	0.61	0.47	0.01	4.16	142	0.4	96.2	34.1	355
xxxxxxx	11835	xxx	Han	woman	64	164	48	17.8465	5.21	5.82	1.15	5.36	1.52	3.11	541.7	3.9	62	325	160	90	1.7	0.93	middle school	retire	xxxxxxxxxxx	2018-09-12	Heart center	42	xxxxxx	80	A	60	5.6	47	49.8	6.5	1.5	0.2	2.35	2.99	0.36	0.08	0.01	4.12	141	0.402	97.6	34.2	350
xxxxxxx	11824	xxx	Uygur	man	52	165	86	31.5886	3.71	4.75	3.46	5.68	0.88	3.79	105.7	3.9	86.1	349.4			1.62	1.42	Secondary specialized school		xxxxxxxxxxx	2018-09-12	Heart center	32	xxxxxx			72	8.11	45	43	7.6	3.9	0.5	3.65	3.49	0.62	0.32	0.04	4.88	141	0.43	88.5	28.9	326
xxxxxxx	11812	xxx	Han	man	65	177	92	29.3658	5.04	5.22	1.98	4.26	0.84	2.55	232	3.8	82	445	130	76	1.26	0.8	middle school	pharmacist	xxxxxxxxxxx	2018-09-12	Heart center	39	xxxxxx	95	O	79	6.9	58.2	27.4	6.7	7.7	0	4.02	1.89	0.46	0.53	0	5.85	199	0.565	96.6	34	352
xxxxxxx	11826	xxx	Uygur	man	57	165	82	30.1194	5.74	4.82	3.62	2.99	0.76	1.28	327.38	4.64	71.3	321.2			1.47	0.76	Secondary specialized school	farmer	xxxxxxxxxxx	2018-09-12	Heart center	50	xxxxxx			76	7.33	43.7	39.6	13.5	2.9	0.3	3.2	2.9	0.99	0.21	0.02	4.95	135	0.42	84.7	27.3	318
xxxxxxx	11884	xxx	Uygur	man	64	168	72	25.5102	6.28	4.6	2.04	6.09	0.8	4.14	938.7	5.7	56	210			1.09	1.16	Junior college	retire	xxxxxxxxxxx	2018-09-13	Heart center	22	xxxxxx	90		76	5.62	2	19.4	6.9	1.2	0.5	4.19	1.13	0.4	0.07	0.03	4.81	140	0.44	91.5	29.1	318
xxxxxxx	11847	xxx	Uygur	woman	59	165	70	25.7117	3.16	4.46	1.75	3.53	6.8	1.73	101.48	2.75	63.45	342			1.28	0.78	middle school	retire	xxxxxxxxxxx	2018-09-15	Heart center	8	xxxxxx			84	12.27	76	11.2	12.1	0.4	0.3	9.33	1.37	1.48	0.05	0.04	3.69	105	0.34	92.1	28.5	309
xxxxxxx	11864	xxx	Han	man	76	170	78	26.9896	5.26	5.39	1.56	3.23	1.17	1.42	95.9	5.3	82	379	130	70	1.51	0.52	Secondary specialized school	retire	xxxxxxxxxxx	2018-09-16	Heart center	34	xxxxxx	95	A	64	8.7	70.6	19.9	7.8	1.6	0.1	6.14	1.73	0.68	0.14	0.01	5.09	155	0.472	92.8	30.4	328
xxxxxxx	11878	xxx	Han	man	51	170	87	30.1038	4.71	5.32	0.63	4.64	1.57	2.57	93.7	4.3	86	359	152	99	1.53	0.63	undergraduate college	civil servant	xxxxxxxxxxx	2018-09-16	Heart center	24	xxxxxx	120	O	74	8.14	80.2	13.1	5.7	0.5	0.5	6.53	1.07	0.46	0.04	0.04	5.18	158	0.45	87.5	30.5	349
xxxxxxx	11880	xxx	Han	man	80	172	70	23.6614	4.26	4.71	1.34	4.4	0.83	3.2	122.56	4.75	99.4	352.1			1.41	1.01	middle school	retire	xxxxxxxxxxx	2018-09-16	Heart center	16	xxxxxx	98		65	5.41	73	16.6	8.9	1.3	0.2	3.95	0.9	0.48	0.07	0.01	3.69	132	0.4	107.6	35.8	332
xxxxxxx	11842	xxx	Han	woman	48	168	58	20.5499	3.92	5.23	1.56	5.24	0.97	1.72	525.6	4.8	62	290	110	60	1.17	0.95	undergraduate college	civil servant	xxxxxxxxxxx	2018-09-16	Heart center	34	xxxxxx	88	B	54	4.7	41.5	49.6	4.8	3.6	0.5	1.95	2.33	0.23	0.17	0.02	3.92	133	0.38	96.5	33.9	351
xxxxxxx	11858	xxx	Uygur	man	58	162	95	36.1988	4.18	4.84	1.89	3.93	0.89	2.38	208.9	6.3	78	440	110	70	1.22	0.68	Junior college	civil servant	xxxxxxxxxxx	2018-09-16	Heart center	34	xxxxxx	95	O	75	6.8	57.8	30.4	9.8	1.9	0.1	3.93	2.07	0.67	0.13	0.01	4.61	139	0.42	91	30.3	332
xxxxxxx	11860	xxx	Uygur	man	60	170	71	24.5675	5.51	5.15	1.54	5.42	0.98	3.61	620.8	4.5	59	330	110	70	1.23	0.92	Secondary specialized school	farmer	xxxxxxxxxxx	2018-09-16	Heart center	32	xxxxxx	99		79	9.2	51.6	41	5.9	1.4	0.1	4.75	3.77	0.54	0.13	0.01	4.21	136	0.4	95	32.3	340
xxxxxxx	11875	xxx	Uygur	man	52	173	98	32.7442	5.46	5.28	3.46	5.87	0.7	3.75	153.4	3.5	71	320	160	100	1.03	1.23	middle school	cadre	xxxxxxxxxxx	2018-09-16	Heart center	23	xxxxxx	111	A	60	6.5	43.7	46.8	6.3	3	0.2	2.84	3.04	0.41	0.19	0.01	4.23	140	0.398	94.2	33	351
xxxxxxx	11883	xxx	Uygur	man	35	174	86	28.4053	3.68	5.32	1.26	3.1	0.67	1.9	617.9	5.5	88	492			0.79	0.48	undergraduate college	teacher	xxxxxxxxxxx	2018-09-18	Heart center	45	xxxxxx	108		72	6.8	43.1	47	7.7	1.6	0.6	2.93	3.2	0.52	0.11	0.04	4.25	138	0.404	95.1	32.5	342
xxxxxxx	12046	xxx	Uygur	man	68	180	93	28.7037	6.85	5.24	2.86	4.06	0.97	2.05	168	6.06	89.99	276.64			1.32	0.73	middle school		xxxxxxxxxxx	2018-10-06	Heart center	47	xxxxxx	95	A	80	6.1	62.6	26.2	9	1.1	1.1	3.82	1.6	0.55	0.07	0.07	4.25	141	0.414	97.3	33.2	341
xxxxxxx	12081	xxx	Han	man	45	180	81	25	4.38	5	1.43	5.39	0.98	3.77	151	5.16	92.7	377.47			1.15	1.05	middle school		xxxxxxxxxxx	2018-10-06	Heart center	43	xxxxxx	93	A	90	6.3	67.3	22.5	8	1.7	0.5	4.24	1.42	0.5	0.11	0.03	5.04	175	0.496	98.4	34.6	352
xxxxxxx	12079	xxx	Uygur	man	51	170	88	30.4498	5.36	4.71	2.29	4.3	0.6	2.91	145.82	4.51	72.3	422.9	200	140	1.19	0.97	Secondary specialized school	cadre	xxxxxxxxxxx	2018-10-07	Heart center	25	xxxxxx	105	O	90	9.06	65.7	23.3	7.3	3.4	0.3	5.95	2.11	0.66	0.31	0.03	5.44	158	0.46	85.1	29	341
xxxxxxx	12026	xxx	Uygur	man	65	185	76	22.206	6.6	5.91	1.7	4.26	1.16	2.62	107.7	8.7	102	442	220	120	1.36	0.76	middle school	farmer	xxxxxxxxxxx	2018-10-07	Heart center	25	xxxxxx	175	O	70	6.4	64.8	26.9	6.2	1.7	0.4	4.15	1.72	0.4	0.11	0.03	5.06	162	0.48	94.9	32	338
xxxxxxx	12080	xxx	Uygur	man	58	170	70	24.2215	4.3	5.26	2.44	6.2	0.98	4.45	65.3	8	103	395.4	140	80	1.32	1.18	Secondary specialized school	retire	xxxxxxxxxxx	2018-10-07	Heart center	24	xxxxxx	112	O	68	9.2	60	28.6	8.6	2.4	0.4	5.52	2.63	0.79	0.22	0.04	4.84	163	0.463	95.7	33.5	351
xxxxxxx	12076	xxx	Uygur	man	51	172	78	26.3656	7.24	7.24	3.95	8.18	0.9	5.58		5.76	77.3	330.9	130	80			Secondary specialized school	staff	xxxxxxxxxxx	2018-10-08	Heart center	16	xxxxxx	107	O	76	8.92	62.9	25.3	10.5	1.1	0.2	5.61	2.26	0.94	0.1	0.02	5.26	162	0.48	90.9	30.8	339
xxxxxxx	12065	xxx	Uygur	woman	66	160	60	23.4375	4.42	4.89	0.71	3.25	1.27	1.47	136	4.8	85.91	289.58			1.32	0.56	middle school	family members	xxxxxxxxxxx	2018-10-09	Heart center	16	xxxxxx		O	75	5.4	60.2	30.4	6.9	1.9	0.6	3.25	1.64	0.37	0.1	0.03	4.75	150	0.414	87.1	29.4	338
xxxxxxx	12087	xxx	Uygur	man	64	178	95	29.9836	5.43	5.32	0.81	3.05	0.94	1.73	220	3.79	91.3	329.1	130	100	1.08	0.64	Secondary specialized school	retire	xxxxxxxxxxx	2018-10-09	Heart center	23	xxxxxx			98	7.6	71.5	22.1	5.3	0.9	0.2	5.43	1.68	0.4	0.07	0.02	4.11	138	0.397	96.5	33.5	348
xxxxxxx	12073	xxx	Han	man	73	160	62	24.2187	6.1	4.8	2.66	5.5	0.78	4.04	86.3	10.3	98	453.7	190	85	1.07	1.13	middle school	retire	xxxxxxxxxxx	2018-10-11	Heart center	8	xxxxxx	95	O	70	5.4	56.1	31.1	9.6	3	0.2	3.03	1.68	0.52	0.16	0.01	3.84	126	0.375	97.8	32.7	334
xxxxxxx	12092	xxx	Uygur	man	64	160	81	31.6406	4.51	5.1	1.87	4.21	0.87	2.88	128.5	5.1	74	322	130	90	1.1	0.89	Secondary specialized school		xxxxxxxxxxx	2018-10-12	Heart center	31	xxxxxx	107	A	68	4.9	57.2	33.1	7.6	1.5	0.6	2.8	1.62	0.37	0.07	0.03	4.89	160	0.467	95.5	32.7	342
xxxxxxx	12104	xxx	Uygur	man	52	161	70	27.0051	5.68	5.2	1.38	3.72	0.75	2.59	307.1	4.9	81	312	100	80	0.8	0.8	middle school		xxxxxxxxxxx	2018-10-13	Heart center	15	xxxxxx		AB	90	9.4	68.4	23.9	5.2	2.4	0.1	6.43	2.25	0.49	0.23	0.01	5.26	160	0.48	91.3	30.4	333
xxxxxxx	12111	xxx	Han	woman	68	160	69	26.9531	8.17		1.25	5.75	1.41	3.51	64.8				160	120	1.5	1.05	illiterate	farmer	xxxxxxxxxxx	2018-10-15	Heart center	28	xxxxxx	90	-	75	6.5	61.4	31.4	5.2	1.6	0.4	3.99	2.04	0.34	0.1	0.03	4.7	141	0.432	90.1	29.9	332
xxxxxxx	12112	xxx	Uygur	man	45	163	75	28.2284	4.69	5.03	0.99	5.03	0.76	3.43	913.8	4.1	63	266	120	70	0.92	1.1	Junior college		xxxxxxxxxxx	2018-10-15	Heart center	30	xxxxxx		-	84	7.7	50.9	32.7	9.7	5.3	1.4	3.92	2.52	0.75	0.41	0.11	5.19	152	0.467	90	29.3	326
xxxxxxx	12339	xxx	Han	woman	66	165	72	26.4463	4.71	5.41	1.53	5.35	1.53	3.31	126.5	8.7	75	366	190	60	1.66	0.85	illiterate	farmer	xxxxxxxxxxx	2018-11-01	Heart center		xxxxxx			60	8	70.7	21.6	5.9	1.7	0.1	5.66	1.73	0.47	0.14	0		120	0.36	94.9	31.6	333
xxxxxxx	12361	xxx	Uygur	woman	60	173	80	26.7299	4.47	5.04	1.66	4.26	1.19	2.29	129.8	3.6	59	188	180	100	1.2	0.83	undergraduate college	retire	xxxxxxxxxxx	2018-11-05	Heart center	47	xxxxxx			85	7.11	72	20	5.2	2.7	0.1	5.12	1.42	0.37	0.19	0.01	5.12	110	0.34	92.4	30	324
xxxxxxx	12343	xxx	Han	man	43	156	60	24.6548	4.57	5.54	1.71	6.52	1.15	4.54	114	5.5	52	256			1.18	1.27	Junior college	staff	xxxxxxxxxxx	2018-11-06	Heart center	20	xxxxxx		A	55	7.3	49.2	38.7	9.1	2.5	0.5	3.59	2.83	0.66	0.28	0.04	4.39	138	0.424	96.5	31.4	325
xxxxxxx	12362	xxx	Uygur	man	56	161	67	25.8478	3.18	4.39	3.34	12.3	0.91	2.01	152	5.6	69	242	160	80	0.8	0.77	Secondary specialized school	farmer	xxxxxxxxxxx	2018-11-06	Heart center	45	xxxxxx			74	7.9	56.2	34.4	6.5	2.8	0.1	4.44	2.72	0.51	0.22	0.01	4.6	143	0.42	91.4	31.3	342
xxxxxxx	12384	xxx	Han	man	48	160	60	23.4375	7.43	7.89	1.65	4.24	0.883	2.86	91.6	8.6	74	356	160	100	1.15	0.88	undergraduate college	pharmacist	xxxxxxxxxxx	2018-11-11	Heart center	23	xxxxxx	84	B	70	6.1	61.1	31.6	6.8	0.4	0.1	3.73	1.93	0.41	0.02	0.01	4.4	140	0.428	95.9	31.4	327
xxxxxxx	12478	xxx	Uygur	man	54	179	120	37.452	5.98	5.36	3.09	5.2	0.69	3.44	186.8	4	72	488			0.97	1.32	middle school	civil servant	xxxxxxxxxxx	2018-11-15	Heart center	15	xxxxxx	140		76	9.9	63.5	25.7	7	3.5	0.3	6.29	2.51	0.69	0.35	0.03	4.87	153	0.454	93.3	31.3	336
xxxxxxx	12635	xxx	Uygur	man	58	170	72	24.9135	4.07	5.13	2.68	3.51	0.65	1.99	279.1	5	110	543	180	100	0.92	0.85	middle school	retire	xxxxxxxxxxx	2018-11-16	Heart center	17	xxxxxx		-	82	5.93	67	22.6	7.4	2.5	0.5	3.97	1.34	0.44	0.15	0.03	4.71	134	0.42	89	28.5	320
xxxxxxx	12474	xxx	Han	man	47	178	90	28.4055	4.66	4.97	1.24	3.54	0.58	2.43	141.4	6.4	56	432			0.84	0.76	Junior college	worker	xxxxxxxxxxx	2018-11-18	Heart center	37	xxxxxx			67	7	65.4	26.2	7.4	0.9	0.1	4.58	1.83	0.52	0.06	0.01	4.05	127	0.373	93.2	21.4	341
xxxxxxx	12660	xxx	Han	woman	54	165	60	22.0386	5	6.04	1.05	3.89	0.8	2.44	23.6	4.9	60	379	180	140	0.97	0.97	middle school	retire	xxxxxxxxxxx	2018-11-25	Heart center	46	xxxxxx	83	Ｏ	72	5.11	54.2	36.8	6.8	2.2	0	2.77	1.88	0.35	0.11	0	4.06	113	0.35	85.7	27.8	325
xxxxxxx	12590	xxx	Han	man	45	176	88	28.4091	5.76	5.89	3.16	4.2	0.85	2.46	128.6	6.9	77	430	130	80	1.11	1.04	middle school	driver	xxxxxxxxxxx	2018-11-26	Heart center	10	xxxxxx	89	B	84	5.4	54.8	39.7	3.6	1.7	0.2	2.96	2.14	0.19	0.09	0.01	5.37	154	0.464	86.3	28.8	333
xxxxxxx	12581	xxx	Han	man	73	172	80	27.0416	4.4	5.28	0.95	4.24	1.09	2.62	259.6	7.7	99	416	110	70	1.13	0.79	Secondary specialized school	retire	xxxxxxxxxxx	2018-11-26	Heart center	28	xxxxxx			86	4.9	54.9	31.6	11.3	1.8	0.4	2.69	1.55	0.55	0.09	0.02	5.09	151	0.471	92.6	29.6	320
xxxxxxx	12582	xxx	Uygur	man	52	175	91	29.7143	4.94	5.56	1.03	3.49	0.82	2.14	377.4	4.5	69	3.9	130	90	0.99	0.7	middle school		xxxxxxxxxxx	2018-11-26	Heart center	20	xxxxxx			60	7.5	64.2	26.8	5.6	3.3	0.1	4.82	2.01	0.42	0.25	0.01	4.26	135	0.412	96.7	31.6	327
xxxxxxx	12608	xxx	Han	man	55	176	85	27.4406	6.26	5.76	1.7	4.55	0.86	3.09	65.9	6.4	61	268	120	80	1.07	0.99	undergraduate college	civil servant	xxxxxxxxxxx	2018-11-27	Heart center	19	xxxxxx			75	5.4	56.5	35.2	4.8	2.4	0.4	3.05	1.9	0.26	0.13	0.02	5.2	161	0.49	93.3	31	332
xxxxxxx	12633	xxx	Uygur	man	59	175	90	29.3878	7.44	8.31	1.92	4.72	0.83	3.13	67.1	5.8	72	213			0.93	1.19	Junior college	retire	xxxxxxxxxxx	2018-11-29	Heart center	30	xxxxxx	95	-	80	5.5	41.8	44.1	12.2	1.7	0.2	2.3	2.43	0.67	0.09	0.01	5.1	151	0.457	89.5	29.7	331
xxxxxxx	12642	xxx	Uygur	woman	61	167	75	26.8923	7	7.37	4.32	7	1.57	4.6		3.58	42.9	206	106	60			middle school	worker	xxxxxxxxxxx	2018-11-29	Heart center	11	xxxxxx	83	-	90	11.73	80.1	14.7	5	0	0.2	9.4	1.72	0.59	0	0.02	4	119	0.36	90.5	29.8	329
xxxxxxx	12650	xxx	Uygur	man	40	175	75	24.4898	9.26	9.15	14.63	6.46	0.96	2.56	255.8	3.2	50	399	160	90	1.73	0.66	undergraduate college	office worker	xxxxxxxxxxx	2018-11-30	Heart center	5	xxxxxx	88	-	76	6.1	40.9	52.2	4.5	1.7	0.7	2.49	3.18	0.27	0.1	0.04	4.58	157	0.477	98.3	32.4	330
xxxxxxx	12629	xxx	Uygur	man	59	158	72	28.8415	7.89	8.43	3.33	5.31	0.78	3.49	87.9	4.2	62	287	160	100	0.96	1.32		retire	xxxxxxxxxxx	2018-11-30	Heart center	12	xxxxxx	89		76	9.3	59.1	33.2	6.2	1.1	0.4	5.5	3.09	0.58	0.1	0.04	5.06	165	0.495	97.7	32.5	333
xxxxxxx	12657	xxx	Uygur	man	42	177	95	30.3233	4.43	5.11	1.2	3.67	0.75	2.33	418.1	5.6	75	345			0.84	0.95	Secondary specialized school	farmer	xxxxxxxxxxx	2018-12-01	Heart center	34	xxxxxx		-	72	5.9	63.9	29.1	3.9	3	0.1	3.77	1.72	0.23	0.18	0.01	4.68	139	0.415	88.8	29.7	334
xxxxxxx	12692	xxx	Han	man	54	170	74	25.6055	9.58	8.99	2.65	4.43	0.79	2.75	118.1	3.6	71	215	125	78	0.98	1.11	middle school	farmer	xxxxxxxxxxx	2018-12-02	Heart center	37	xxxxxx	99	A	78	4.82	57.2	32.8	7.7	1.7	0.2	2.76	1.58	0.37	0.08	0.01	5.34	160	0.46	85.6	30	350
xxxxxxx	12653	xxx	Han	man	50	175	79	25.7959	3.71	4.42	1.71	2.4	0.53	1.37	266.18	5.02	71.8	381.6	130	80	1.19	0.64	Junior college	civil servant	xxxxxxxxxxx	2018-12-02	Heart center	43	xxxxxx	89	AB	94	8.17	48.5	42.5	6.6	1.8	0.6	3.96	3.47	0.54	0.15	0.05	4.3	139	0.42	97.4	32.3	332
xxxxxxx	12715	xxx	Han	man	74	169	80	28.0102	5.22	5.67	2.43	4.86	0.92	3.18	225.5	5	102	425			1.04	1.12	middle school	civil servant	xxxxxxxxxxx	2018-12-02	Heart center	19	xxxxxx			80	5.46	50.2	38.1	5.3	5.7	0.5	2.74	2.08	0.29	0.31	0.03	4.83	147	0.46	95.2	30.8	324
xxxxxxx	12691	xxx	Uygur	man	72	178	95	29.9836	4.45	5.77	0.94	3.34	0.99	1.95	89.5	5.7	92	350	130	90	1.1	0.59	Junior college	retire	xxxxxxxxxxx	2018-12-02	Heart center	38	xxxxxx	100	AB	76	8.77	57.8	27.6	9.6	4.1	0.7	5.07	2.42	0.84	0.36	0.06	4.29	135	0.41	96.5	31.5	326
xxxxxxx	12659	xxx	Uygur	man	51	177	74	23.6203	7.14	8.08	0.65	3.96	0.73	2.94	37.7	7.3	55	255	160	90	0.79	0.25	undergraduate college	civil servant	xxxxxxxxxxx	2018-12-02	Heart center	49	xxxxxx	85	AB	80	5.63	53.7	39.1	4.8	2	0.2	3.02	2.2	0.27	0.11	0.01	4.74	139	0.43	56.1	29.3	326
xxxxxxx	12662	xxx	Han	man	62	175	75	24.4898	4.61	5.75	1.09	4.12	0.84	2.73	76.6	5.9	61	349	120	80	1.11	0.88	middle school	retire	xxxxxxxxxxx	2018-12-03	Heart center	32	xxxxxx	88	Ｏ	76	7.4	62.3	27.9	6.1	3.3	0.4	4.61	2.06	0.45	0.24	0.03	4.51	144	0.434	96.3	32	332
xxxxxxx	12656	xxx	Uygur	man	52	163	74	27.852	4.13	5.29	1.67	5.74	1.04	3.72	117.8	7.7	55	256	130	70	1.18	1.1	middle school	farmer	xxxxxxxxxxx	2018-12-03	Heart center	30	xxxxxx		-	85	6.38	43.7	46.7	5.8	3.3	0.3	2.79	2.98	0.37	0.21	0.02	4.57	147	0.43	93.4	32.2	344
xxxxxxx	12694	xxx	Uygur	man	50	170	86	29.7578	7.24	7.07	1.02	7.59	2.38	5.62		3.91	71.48	248	130	80			middle school	farmer	xxxxxxxxxxx	2018-12-03	Heart center	47	xxxxxx	110			10.69	51.1	31.1	9.9	1	0.3	6.17	3.32	1.06	0.11	0.03	4.72	135	0.41	87.7	28.6	326
xxxxxxx	12700	xxx	Uygur	man	48	167	60	21.5139	4.03	5.47	1.9	5.31	0.97	3.38	140.8	7.9	64	345	120	80	1.07	1.08	illiterate	farmer	xxxxxxxxxxx	2018-12-05	Heart center	23	xxxxxx		B	70	10.28	51.7	34.7	10.2	3.2	0.2	5.29	3.57	1.05	0.33	0.02	5.12	161	0.48	94.3	31.4	333
xxxxxxx	12708	xxx	Han	man	39	168	80	28.3447	8.06	7.37	1.67	4.82	0.77	3.41	368.4	4.03	77.1	335.3			1.45	1.25	middle school	farmer	xxxxxxxxxxx	2018-12-05	Heart center	31	xxxxxx		A	87	6.7	62.4	29.7	4.9	2.4	0.6	4.18	1.99	0.33	0.16	0.04	4.86	163	0.48	99.9	33.5	342
xxxxxxx	12703	xxx	Han	woman	53	155	64	26.6389	4.7	5.57	2.19	4.91	1	3.29	207.6	4.7	49	360	170	130	1.3	1.07	middle school	retire	xxxxxxxxxxx	2018-12-06	Heart center	14	xxxxxx	90	A	70	4.89	63.9	29.4	4.3	2.2	0.2	3.12	1.44	0.21	0.11	0.01	4.91	140	0.43	87	28.5	328
xxxxxxx	12724	xxx	Han	man	38	170	68	23.5294	5.41	5.52	1.77	4.09	0.85	2.49	64.8	4.8	77	284	115	75	0	0.92	middle school	farmer	xxxxxxxxxxx	2018-12-08	Heart center	30	xxxxxx	98	B	76	9.16	71.9	21.5	5.1	1.2	0.02	6.59	1.98	0.47	0.11	0.02	5.76	147	0.47	81.1	25.5	315
xxxxxxx	12737	xxx	Han	woman	66	159	56	22.151	4.43	5.56	3.1	6.51	1.19	4.33	97.5	5.2	65	380			1.4	1.61	Secondary specialized school	retire	xxxxxxxxxxx	2018-12-09	Heart center	11	xxxxxx			78	6.65	56.1	35.2	4.8	3.3	0.3	3.73	2.34	0.34	0.22	0.02	4.29	135	0.42	98.4	31.5	320
xxxxxxx	12736	xxx	Han	woman	67	165	75	27.5482	10.71		1.54	3.17	0.93	1.71	208.3				220	130			middle school	family members	xxxxxxxxxxx	2018-12-11	Heart center	22	xxxxxx	74		76	4.8	51.5	42.2	4.9	1.2	0.2	2.47	2.03	0.24	0.06	0.01	4.12	127	0.39	93.6	30.9	330
xxxxxxx	12963	xxx	Uygur	man	56	175	125	40.8163	8.35	7.47	1.24	3.5	0.75	2.66	225.21	5.52	92.6	447.8			1.24	0.87	retire		xxxxxxxxxxx	2018-12-25	Heart center	3	xxxxxx			85	6.33	57.9	32.9	8.2	0.8	0.2	3.67	2.08	0.52	0.05	0.01	4.5	135	0.43	95.8	30	313
xxxxxxx	12982	xxx	Han	man	74	170	75	25.9516	3.72	4.24	1.11	3.06	0.58	2.15	7.4	3.81	83.5	299.6	120	75	1.29	0.63	middle school	retire	xxxxxxxxxxx	2019-01-03	Heart center	8	xxxxxx			65	5.6	60.5	26.1	10	2.9	0.5	3.39	1.46	0.56	0.16	0.03	3.96	119	0.38	95.2	30.1	316
xxxxxxx	12999	xxx	Uygur	man	77	162	72	27.4348	3.98	5.39	0.83	3.52	0.87	2.1	412	6.4	80	237	180	110	0.9	0.83	Junior college	retire	xxxxxxxxxxx	2019-01-04	Heart center	8	xxxxxx			73	11.4	87.1	8.5	2.7	1.6	0.1	7.3	0.97	0.31	0.18	0.01	5.32	144	0.433	81.4	27	332
xxxxxxx	13119	xxx	Han	man	71	162	72	27.4348	4.94	5.7	1.27	4.14	1.06	2.52	57.7	7.4	84	292			1.2	0.74	Secondary specialized school	retire	xxxxxxxxxxx	2019-01-07	Heart center	35	xxxxxx			70	6.11	69.1	20.9	7.7	1.8	0.2	4.22	1.28	0.47	0.11	0.01	5.13	153	0.49	95.3	29.8	313
xxxxxxx	13116	xxx	Han	woman	68	167	60	21.5139	5.71	5.62	2.34	4.48	0.81	2.95	109.4	4.8	53	216	180	100	1.01	0.9	Secondary specialized school	worker	xxxxxxxxxxx	2019-01-08	Heart center	40	xxxxxx			81	4.46	47.1	45.5	4.3	2.7	0.2	2.1	2.03	0.19	0.12	0.01	4.14	102	0.33	80	24.6	308
xxxxxxx	13295	xxx	Uygur	man	59	162	87	33.1504		5.25	0.94	2.78	1.32	1.26									retire		xxxxxxxxxxx	2019-01-08	Heart center		xxxxxx
xxxxxxx	13295	xxx	Uygur	man	59	162	87	33.1504		5.19	1.82	2.81	0.99	1.28									retire		xxxxxxxxxxx	2019-01-08	Heart center		xxxxxx
xxxxxxx	13101	xxx	Han	man	53	163	70	26.3465	6.59	5.05	0.93	3.58	0.96	2.05	134.6	5.7	54	316			0.91	0.7	middle school		xxxxxxxxxxx	2019-01-08	Heart center	44	xxxxxx			66	7.27	61.2	30	66	1.5	0.4	4.45	2	0.48	0.11	0.03	4.54	135	0.42	92.3	29.7	322
xxxxxxx	13090	xxx	Han	woman	67	156	64	26.2985	4.56	5.65	0.74	2.95	1.4	1.25	71.4	6.9	58	332			1.47	0.41	Secondary specialized school	retire	xxxxxxxxxxx	2019-01-09	Heart center	36	xxxxxx	105		68	4.71	50.6	42	5.3	1.9	0.2	2.38	1.98	0.25	0.09	0.01	4.39	138	0.42	94.5	31.4	333
xxxxxxx	13091	xxx	Han	man	42	173	65	21.7181	4.89	5.38	1.53	5.07	0.93	3.56	138.3	5.7	74	392			0.96	1.12	middle school		xxxxxxxxxxx	2019-01-09	Heart center	45	xxxxxx	105		76	7.67	39.4	50.1	8.3	1.8	0.3	3.02	3.84	0.64	0.14	0.02	4.42	139	0.43	96.4	31.4	326
xxxxxxx	13114	xxx	Uygur	man	68	176	78	25.1808	4.79	5.2	0.91	4.2	0.71	2.88	32.6	8.73	75.7	340.2	160	90	0.8	1.03	Secondary specialized school	farmer	xxxxxxxxxxx	2019-01-09	Heart center	14	xxxxxx	115	B	84	5.31	63.2	27.3	7	2.3	0.2	3.36	1.45	0.37	0.12	0.01	4.62	125	0.41	88.7	27.1	305
xxxxxxx	13117	xxx	Uygur	man	79	163	72	27.0993	7.89	8.27	1.16	3.91	0.87	2.62	616.4	7.6	68	274			1.07	0.82	middle school	farmer	xxxxxxxxxxx	2019-01-10	Heart center	35	xxxxxx			72	6.53	49.2	38.6	10.1	1.5	0.6	3.21	2.52	0.66	0.1	0.04	5.05	138	0.43	84.2	27.3	325
xxxxxxx	13113	xxx	Han	man	48	165	77	28.2828	8.23	7.46	3.76	3.27	0.69	1.59	370.94	3.13	76.9	243.7			1.22	0.59	Junior college	retire	xxxxxxxxxxx	2019-01-12	Heart center	7	xxxxxx			68
xxxxxxx	13102	xxx	Uygur	woman	69	157	61	24.7475	4.66	4.94	2.82	5.14	1	3.42	34.4	5.6	49	239.4			1.23	1.12	middle school	retire	xxxxxxxxxxx	2019-01-13	Heart center	33	xxxxxx	100		70	10.45	87.3	11	1.4	0.2	0.1	7.12	1.15	0.15	0.02	0.01	3.53	99	0.79	83.3	28	337
xxxxxxx	13100	xxx	Han	man	84	175	74	24.1633	6.81	4.9	2.6	2.65	1.47	0.92		4.31	65.5	295.5	170	90			Junior college	retire	xxxxxxxxxxx	2019-01-14	Heart center	17	xxxxxx	115		72	8.49	61.6	22.9	11.5	3.9	0.1	5.23	1.94	0.98	0.33	0.01	4.17	121	0.38	90.4	29	321
xxxxxxx	13205	xxx	Uygur	man	55	174	76	25.1024	7.35	6.52	1.01	3.91	1.17	2.26	227.2	5.79	100	284.8			0.85	0.85	Secondary specialized school	worker	xxxxxxxxxxx	2019-01-14	Heart center	18	xxxxxx	125	O	78	13.56	74.6	14.3	10.3	0.2	0.2	10.12	1.94	1.4	0.03	0.03	5.06	149	0.44	87.2	29.4	338
xxxxxxx	13179	xxx	Uygur	man	67	175	58	18.9388	4.28	5.49	1.22	4.21	0.97	2.79	348.3	4.7	73	296			1.01	1.09	illiterate	farmer	xxxxxxxxxxx	2019-01-15	Heart center	21	xxxxxx			90	7.05	63.9	30.1	4.1	1.4	0.1	4.5	2.12	0.29	0.1	0.01	5.38	147	0.47	87.2	27.3	313
xxxxxxx	13184	xxx	Han	woman	46	159	48	18.9866	4.19	5.71	0.88	4.04	1.75	1.99	178.7	6	67	242			1.73	0.52	Junior college	office worker	xxxxxxxxxxx	2019-01-18	Heart center	4	xxxxxx		A	94	7.46	56.7	35.1	7	0.7	0.4	4.23	2.62	0.52	0.05	0.03	4.45	134	0.4	90.8	32.1	332
xxxxxxx	13209	xxx	Uygur	woman	43	165	66	24.2424	3.53	5.73	2.85	4.79	0.87	2.73	1244.4	4.7	99	315	160	100	1.09	1.12	Junior college	doctor	xxxxxxxxxxx	2019-01-20	Heart center	48	xxxxxx			75	6.72	62.6	30.8	4	2.1	0.4	4.21	2.07	0.27	0.14	0.03	3.69	119	0.36	98.1	32.2	329
xxxxxxx	13208	xxx	Uygur	man	56	175	95	31.0204	8.18	8.58	3.65	9.57	0.81	6.81	135.8	4.8	54	277	180	110	0.92	2.16	Junior college	cadre	xxxxxxxxxxx	2019-01-20	Heart center	28	xxxxxx	130	AB	75	6.95	65.4	25.6	5.8	2.6	0.3	4.55	1.78	0.4	0.18	0.02	5.12	145	0.45	87.7	28.3	323
xxxxxxx	13238	xxx	Uygur	woman	61	159	80	31.6443	4.5	5.45	2.84	7.35	1.32	5.42	170.3	3.9	69	377	180	90	1.52	1.77	Secondary specialized school	farmer	xxxxxxxxxxx	2019-01-21	Heart center	26	xxxxxx			74	6.69	36.1	54.7	6.1	2.7	0.3	2.42	3.66	0.41	0.18	0.02	4.26	119	0.37	87.4	27.9	319
xxxxxxx	13210	xxx	Uygur	woman	60	158	61	24.4352	8.47	8	2.32	5.46	0.96	3.22	146.5	6.8	46	229	190	100	1.26	1.02	middle school	not in detail	xxxxxxxxxxx	2019-01-21	Heart center	18	xxxxxx	125		75	6.53	62.8	25.3	6	4.4	0.9	4.1	1.65	0.39	0.29	0.06	4.17	115	0.36	85.9	27.6	321
xxxxxxx	13251	xxx	Han	woman	62	180	88	27.1605	4.54	5	0.51	2.4	1.26	0.97	108.4	4.7	62	229	120	80	1.26	0.28	Secondary specialized school	farmer	xxxxxxxxxxx	2019-01-22	Heart center	29	xxxxxx			80	4.84	47.1	42.4	6.2	4.1	0.2	2.28	2.05	0.3	0.2	0.01	4.08	123	0.38	94.1	30.1	320
xxxxxxx	13217	xxx	Uygur	man	42	176	111	35.8342	4.33	5.31	2.48	4.89	0.95	2.9	85.7	5.7	95	374			1.17	0.96	Junior college	civil servant	xxxxxxxxxxx	2019-01-22	Heart center	13	xxxxxx	130	O	82	7.48	45.9	43.9	7.6	1.7	0.5	3.43	3.28	0.57	0.13	0.04	5.41	158	0.48	89.3	29.2	327
xxxxxxx	12983	xxx	Han	woman	62	174	88	29.0659	4.54	5	0.51	2.4	1.26	0.97	108.4	4.7	62	229	120	80	1.26	0.28	Secondary specialized school	farmer	xxxxxxxxxxx	2019-01-22	Heart center	29	xxxxxx			80	4.84	47.1	42.4	6.2	4.1	0.2	2.28	2.05	0.3	0.2	0.01	4.08	123	0.38	94.1	30.1	320
xxxxxxx	13269	xxx	Uygur	woman	43	179	86	26.8406	2.44	3.77	4.77	4.17	3.17	1.05	8.9	47	317	4.67		150	1.08	217.9	middle school		xxxxxxxxxxx	2019-01-22	Heart center	30	xxxxxx				6.56	25.2	6.3	2.5	0.3	4.7	1.81	0.45	0.18	0.02	4.45	130	0.41	91.9	29.2	318	13.1
xxxxxxx	13258	xxx	Uygur	woman	67	159	85	33.6221	4.58	5.44	0.75	2.24	0.75	3.44	1.29	4.5	53	230	130	60	1.32	1.76	Junior college		xxxxxxxxxxx	2019-01-22	Heart center	47	xxxxxx			75	6.54	56.4	32.6	4.9	5.5	0.6	3.69	2.13	0.32	0.36	0.04	4.36	132	0.42	95.2	30.3	318
xxxxxxx	13256	xxx	Han	man	46	170	77	26.6436	5.23	5.64	3.14	2.8	0.94	1.11	87.9	5.9	88	350	90	50	1.23	0.46	Junior college	civil servant	xxxxxxxxxxx	2019-01-22	Heart center	51	xxxxxx			75	7.96	61.6	28.4	6.3	3	0.3	4.9	2.26	0.5	0.24	0.02	4.65	148	0.44	94.8	31.8	336
xxxxxxx	13249	xxx	Uygur	man	51	162	50	19.052	4.03	5.38	0.99	4.61	0.91	3.27	142.5	5.7	59	338	134	78	0.93	1.12	middle school	farmer	xxxxxxxxxxx	2019-01-23	Heart center	2	xxxxxx			66	5.74	63	26.3	7	3.1	0.3	0.3	3.62	1.51	0.4	0.18	4.45	145	0.41	91.9	30.6	333
xxxxxxx	13281	xxx	Uygur	man	48	174	82	27.0842	4.26	5.01	5.87	5.74	0.84	2.84	465.62	6.16	75.1	428.6	120	80	1.44	1.17	undergraduate college	cadre	xxxxxxxxxxx	2019-01-23	Heart center	9	xxxxxx				6.6	50.2	39.2	8.2	1.8	0.6	3.31	2.59	0.54	0.12	0.04	4.54	148	0.43	94.3	32.6	346
xxxxxxx	12984	xxx	Han	woman	76	163	52	19.5717	4.16	5.75	1.16	4.75	2.79	1.28	11.1	3.5	71	260	153	83	0.88	172.9	undergraduate college	retire	xxxxxxxxxxx	2019-01-23	Heart center	24	xxxxxx			68	4.38	43.8	39.7	5.7	9.4	1.4	1.92	174	0.28	0.41	0.06	4.16	132	0.39	93.8	31.7	338
xxxxxxx	13252	xxx	Uygur	woman	51	175	83	27.102	10.12	7.2	1.24	3.94	0.97	2.63	349.75	5.58	58.6	246.5	120	85	1.34	0.77	illiterate	teacher	xxxxxxxxxxx	2019-01-23	Heart center	10	xxxxxx			72	5.17	52.7	42.6	0.8	3.5	0.4	2.72	2.2	0.04	0.18	0.02	4.69	120	0.4	84.6	25.6	302
xxxxxxx	13351	xxx	Uygur	man	49	175	84	27.4286	3.97	5.29	1.2	3.26	0.9	1.95	64.1	7	81	307	110	70	0.84	0.69	middle school		xxxxxxxxxxx	2019-01-23	Heart center	47	xxxxxx	92		88	7.08	50.9	37.4	7.6	3.4	0.4	3.6	2.65	0.54	0.24	0.03	4.94	148	0.46	92.3	30	325
xxxxxxx	13255	xxx	Han	woman	62	173	56	18.7109	6.24	4.92	2.76	4.56	1.1	2.4	317.14	5.23	65.1	266	120	80	1.64	0.93	illiterate	farmer	xxxxxxxxxxx	2019-01-23	Heart center	15	xxxxxx			78	6.48	58.3	37.8	1.7	1.9	0.3	3.78	2.45	0.11	0.12	0.02	4.35	131	0.4	91	30.1	331
xxxxxxx	13253	xxx	Uygur	woman	66	166	72	26.1286	4.29	4.93	2.37	5.74	1.04	4.11	404	8.4	86	427.9	140	80	1.09	1.26	illiterate	farmer	xxxxxxxxxxx	2019-01-24	Heart center	38	xxxxxx			78	6.3	39.4	49.3	7.1	3.9	0.3	2.48	3.11	0.45	0.25	0.02	5.34	126	0.4	74.9	23.6	315
xxxxxxx	13270	xxx	Uygur	man	38	185	81	23.6669	1.75	5.63	4.48	4.92	3.15	1.03	14.7	77	374	3.69	86		1.05	129.1	Secondary specialized school		xxxxxxxxxxx	2019-01-24	Heart center	1300728	xxxxxx		139		6.45	24.5	7.1	2.3	0.3	5.1	1.94	0.56	0.18	0.02	5.96	169	0.5	84.1	2.4	337	13.6
xxxxxxx	13268	xxx	Uygur	man	55	176	82	26.4721	2	4.08	3.89	3.97	2.71	0.86	7.9	103	427	4.46		103	0.91	370.5	Secondary specialized school		xxxxxxxxxxx	2019-01-24	Heart center	1300760	xxxxxx				6.9	14.6	13.6	2.5	0.1	5.49	1.16	1.08	0.2	0.01	5.11	143	0.44	85.3	28	328	14
xxxxxxx	13232	xxx	Han	man	44	165	62	22.7732	3.66	5.01	1.1	3.18	1.29	1.9	417.7	5.4	66	213.3	100	69	1.24	1.58	middle school	farmer	xxxxxxxxxxx	2019-01-24	Heart center	31	xxxxxx			88	5.4	66	213.3	3.66	1.81	1.1	3.18	1.29	1.9	1.24	1.5	4.72	123	0.45	100.7	33.5	333
xxxxxxx	13239	xxx	Han	man	41	161	74	28.5483	3.84	5.5	1.04	3.28	1.07	2.11	94.6	5.1	83	286.1	110	70	1.08	0.71	middle school	worker	xxxxxxxxxxx	2019-01-24	Heart center		xxxxxx			96	3.79	50.6	38.3	7.4	2.9	0.5	1.92	1.45	0.28	0.11	0.02	4.98	149	0.45	91.2	29.9	328
xxxxxxx	13306	xxx	Han	woman	70	158	60	24.0346	6.97	4.94	1.61	4.22	0.86	3.04	298.01	6.86	70.6	323.4	120	80	1.49	1.04	middle school	teacher	xxxxxxxxxxx	2019-01-24	Heart center	11	xxxxxx			60	6.45	63.1	27.6	7	2	0.3	4.07	1.78	0.45	0.13	0.02	3.63	108	0.33	91.7	29.8	324
xxxxxxx	13291	xxx	Uygur	woman	25	153	57	24.3496	2.2	3.66	3.77	3.81	2.07	1.46	6.4	71	262.3	4.37	60		0.55	107.8	undergraduate college		xxxxxxxxxxx	2019-01-27	Heart center	1301269	xxxxxx		90		4.03	49.2	7.4	2.9	0.2	2.39	2.92	0.44	0.17	0.01	4.07	127	0.38	92.1	31.2	339	12.8
xxxxxxx	13298	xxx	Uygur	man	53	155	73	30.385	5.7	5.2	0.93	2.13	0.77	1.33	263.9	3.8	84	217.2			0.85	0.49	civil servant		xxxxxxxxxxx	2019-01-27	Heart center	4	xxxxxx			80	7.43	56.1	32.8	9	1.6	0.5	4.17	2.44	0.67	0.12	0.04	4.84	136	0.41	84.7	28.1	301
xxxxxxx	13287	xxx	Uygur	man	40	161	70	27.0051	4.32	5.16	1.14	2.64	0.64	1.47	169.1	4.6	62	226	110	70	0.85	0.66	retire		xxxxxxxxxxx	2019-01-27	Heart center	30	xxxxxx			102	4.6	62	22.6	4.32	1.96	1.14	2.64	0.64	1.47	0.85	0.66	4.5	121	0.38	96.5	30.4	315
xxxxxxx	13282	xxx	Uygur	man	68	168	72	25.5102	5.84	5.3	1.55	5.62	0.82	3.81	231.6	4.5	53	462	140	70	0.84	1.39	Junior college	teacher	xxxxxxxxxxx	2019-01-27	Heart center	20	xxxxxx			72	8.6	61.5	26.9	7.5	2.7	0.4	5.29	2.31	0.73	0.23	0.03	4.96	141	0.41	82.6	28.5	345
xxxxxxx	13244	xxx	Han	woman	66	166	83	30.1205	4.81	5.36	1.93	4.31	1.19	2.92	96	5.28	64.08	270.41	150	90	1.46	0.82	middle school	retire	xxxxxxxxxxx	2019-01-27	Heart center	5	xxxxxx			90	5.84	55.2	36.1	5.1	3.4	0.2	3.22	2.11	0.3	0.2	0.01	5.05	138	0.44	86.7	27.3	325
xxxxxxx	13349	xxx	Uygur	man	53	171	83	28.3848	4.68	5.3	1.2	4.88	1.49	3.25	79.5	8.3	110	359.1	120	70	1.31	0.89	Secondary specialized school	retire	xxxxxxxxxxx	2019-01-27	Heart center	17	xxxxxx	92		76	5.62	64.2	19.2	5.9	10.1	0.4	3.61	1.08	0.33	0.57	0.02	4.82	146	0.45	93.2	30.3	325
xxxxxxx	13303	xxx	Han	man	42	159	59	23.3377	4.05	5.01	1.72	3.94	0.85	2.25	63.8	6.1	66	364			1.1	1.03	retire		xxxxxxxxxxx	2019-01-28	Heart center	45	xxxxxx			80	6.44	47.4	43.2	8.4	0.5	0.3	3.05	2.78	0.54	0.03	0.02	4.72	154	0.45	95.1	32.6	343
xxxxxxx	13284	xxx	Uygur	man	48	162	64	24.3865	5.76	5.1	3.53	5.48	0.69	3.78	250.7	3.3	67.1	247.3	120	80	1.42	1.2	Secondary specialized school	cadre	xxxxxxxxxxx	2019-01-28	Heart center	29	xxxxxx			75	5.94	37.2	52.4	7.8	2.4	0.2	2.21	3.11	0.46	0.14	0.01	4.47	133	0.42	93.3	29.8	319
xxxxxxx	13305	xxx	Han	man	53	165	71	26.079	5	5.1	1.01	3.66	0.98	2.09	10.41	5.83	87.82	346.84			1.07	0.66	middle school		xxxxxxxxxxx	2019-01-29	Heart center	37	xxxxxx	71	O	60	8.4	51.3	37	6.7	4.6	0.4	4.31	3.11	0.56	0.39	0.03	4.52	142	0.43	93.9	31	335
xxxxxxx	13352	xxx	Uygur	man	48	170	81	28.0277	7.78	7.5	4.16	4.62	1.09	3.1	63.8	6.57	67.6	395.6	100	70	1.23	0.87	middle school	farmer	xxxxxxxxxxx	2019-01-29	Heart center	36	xxxxxx	90		70	8.91	61.8	26.1	7	4.4	0.5	5.06	2.14	0.57	0.36	0.04	5.33	150	0.45	84.5	28.1	332
xxxxxxx	13345	xxx	Han	man	39	178	115	36.2959	5.63	5.63	4.08	4.33	0.81	2.5	122	5.1	59	369	210	120	1.19	0.99	middle school		xxxxxxxxxxx	2019-01-31	Heart center	8	xxxxxx			80	8.32	51.4	38	7.6	1.9	0.5	4.28	3.16	0.63	0.16	0.04	5.34	150	0.47	88.4	28.1	318
xxxxxxx	13353	xxx	Uygur	woman	52	163	77	28.9811	8.46	7.07	1.24	2.98	0.49	2.19	184.53	5.32	77.05	501	150	100	0.85	0.79	Secondary specialized school	family members	xxxxxxxxxxx	2019-01-31	Heart center	28	xxxxxx	85	B	88	7.7	63.9	25.7	8.6	1.4	0.4	4.95	1.98	0.66	0.11	0.03	3.78	100	0.32	84.9	26.5	312
xxxxxxx	13365	xxx	Uygur	man	58	176	80	25.8264	4.76	5.41	3.49	4.2	0.75	2.36	84.2	4.9	72	299	110	65	0.96	0.97	Secondary specialized school	civil servant	xxxxxxxxxxx	2019-01-31	Heart center	6	xxxxxx	88		58	4.56	39.5	54.2	4.6	1.3	0.2	1.8	2.47	0.21	0.06	0.01	4.81	143	0.41	85.2	29.7	349
xxxxxxx	13354	xxx	Han	man	66	172	75	25.3515	3.95	5.33	1.9	3.41	1.08	1.81	93	4.7	86	319	120	80	1.33	0.66	middle school	retire	xxxxxxxxxxx	2019-02-01	Heart center	16	xxxxxx	88		80	8.78	64.3	26.4	6.9	1.9	0.2	5.65	2.32	0.61	0.17	0.02	5	148	0.46	91.6	29.6	323
xxxxxxx	13373	xxx	Han	man	66	178	83	26.1962	5.15	4.24	1.11	2.78	0.68	1.61	156	4.85	77.3	299	160	80	1.24	0.7	middle school	farmer	xxxxxxxxxxx	2019-02-01	Heart center	21	xxxxxx	88		92	7.65	72.4	18.3	8.2	0.8	0.3	5.54	1.4	0.63	0.06	0.02	4.81	142	0.42	87.7	29.5	336
xxxxxxx	13363	xxx	Han	man	51	173	72	24.0569	5.12	5.2	2.45	3.53	0.69	1.97	142.6	5.6	67	446	190	140	0.8	0.9	Secondary specialized school		xxxxxxxxxxx	2019-02-04	Heart center	26	xxxxxx	86		74	6.31	59.4	31.1	7.9	1.4	0.2	3.75	1.96	0.5	0.09	0.01	5.15	151	0.45	87.8	29.3	334
xxxxxxx	13370	xxx	Uygur	man	65	165	62	22.7732	4.74	5.18	1.11	5.06	1.12	3.44	155.9	7.9	72	284	130	80	1.33	1.23	illiterate	farmer	xxxxxxxxxxx	2019-02-04	Heart center	14	xxxxxx			74	5.26	64.2	29.1	3.6	1.7	0.6	3.38	1.53	0.19	0.09	0.03	4.99	147	0.45	90.6	29.5	325
xxxxxxx	13579	xxx	Han	woman	70	160	70	27.3437	4.69	5.81	1.57	5.76	1.37	3.78	83.3	6.8	87	337	130	70	1.48	1.13	middle school	retire	xxxxxxxxxxx	2019-02-05	Heart center	22	xxxxxx	95	AB	80	5.64	54.9	29.8	7.4	6.6	1.1	3.1	1.68	0.42	0.37	0.06	4.02	116	0.36	89.6	28.9	322
xxxxxxx	13398	xxx	Uygur	man	60	174	80	26.4236	5.01	5.65	1.95	4.17	1.33	2.02	102.8	3.7	94	398			1.22	0.87	illiterate	farmer	xxxxxxxxxxx	2019-02-15	Heart center	44	xxxxxx			62	4.74	51	39.5	6.3	3	0.2	2.42	1.87	0.3	0.14	0.01	5.18	162	0.47	90.7	31.3	345
xxxxxxx	13494	xxx	Uygur	man	35	170	68	23.5294	3.98	5.18	1.31	4.21	0.81	2.86	107.6	5.5	76	430	130	70	0.97	1.07	Junior college	-	xxxxxxxxxxx	2019-02-20	Heart center	3	xxxxxx	110	O	68	11.23	48	41.2	5.4	4.7	0.4	5.39	4.63	0.81	0.53	0.04	5.4	164	0.5	91.7	30.4	331
xxxxxxx	13551	xxx	Uygur	man	48	167	63	22.5896	4.44	4.9	1.4	3.57	1.04	2.33	90.4	5.5	77	335	110	60	1.14	0.64	Secondary specialized school	farmer	xxxxxxxxxxx	2019-02-21	Heart center	46	xxxxxx	80	A	67	5.81	52.1	39.1	7.4	1.2	0.2	3.03	2.27	0.43	0.07	0.01	4.57	128	0.39	85.6	28	327
xxxxxxx	13571	xxx	Han	woman	57	156	62	25.4767	6.54	5	2.57	5.89	0.87	3.23	180.15	4.17	51.85	324.19	180	90	1.62	1	illiterate	retire	xxxxxxxxxxx	2019-02-24	Heart center	33	xxxxxx	95	O	80	5.63	54.3	37.7	5.3	1.4	0.9	3.07	2.12	0.3	0.08	0.05	4.49	134	0.41	91.7	29.8	325
xxxxxxx	13577	xxx	Han	man	53	169	77	26.9598	8.07	7.07	2.15	3.65	0.63	2.03	692.1	9.31	67.17	290.97	170	100	1.25	0.69	middle school	worker	xxxxxxxxxxx	2019-02-24	Heart center	2	xxxxxx	93	B	76	5.78	59.4	31.3	6.6	2.4	0.3	3.43	1.81	0.38	0.14	0.02	4.61	138	0.42	90	29.9	333
xxxxxxx	13583	xxx	Han	woman	64	156	55	22.6003	4.5	5.51	1.99	4.58	1.38	2.56	165.56	6.9	74	336	117	79	1.54	0.84	middle school		xxxxxxxxxxx	2019-02-25	Heart center	30	xxxxxx	88	AB	83	5.69	52.4	38.7	5.3	3	0.4	2.98	2.2	0.3	0.17	0.02	3.71	114	0.34	92	30.7	331
xxxxxxx	13555	xxx	Han	man	57	170	81	28.0277	4.93	5.56	1.83	3.79	0.93	2.32	87	6.9	94	383	120	70	1.27	0.66	middle school	worker	xxxxxxxxxxx	2019-02-25	Heart center		xxxxxx	93	A	74	6.27	49.7	41	6.7	2.4	0.2	3.12	2.57	0.42	0.15	0.01	5.34	164	0.5	92.9	30.7	331
xxxxxxx	13566	xxx	Han	man	71	171	89	30.4367	6.12	5.2	2.95	6.39	1.11	4.07	84.9	6.2	120	468.8	120	70	1.19	1.32	middle school	worker	xxxxxxxxxxx	2019-02-25	Heart center	37	xxxxxx	90	O	74	12.45	48.9	43.1	4.1	3.4	0.3	6.09	5.27	0.51	0.42	0.04	4.06	138	0.41	101.2	33.7	333
xxxxxxx	13563	xxx	Han	man	48	171	85	29.0688	4.19	5.3	1.17	4.6	1.01	2.97	201.6	3.5	57	306	112	76	1.28	0.97	middle school		xxxxxxxxxxx	2019-02-25	Heart center	31	xxxxxx	90		63	6.17	56.8	27.9	8.3	5.2	1.81	3.5	1.72	0.51	0.32	0.11	5.09	104	0.47	92.9	32.2	347
xxxxxxx	13585	xxx	Han	woman	38	170	64	22.1453	4.5	5.5	1.18	4.06	1.2	2.4	64.1	4.9	44	206	110	70	1.32	0.64	Junior college	staff	xxxxxxxxxxx	2019-02-25	Heart center	44	xxxxxx	76	A	67	6.9	53.2	39	4.8	2.3	0.6	3.67	2.69	0.33	0.16	0.04	4.16	130	0.41	97.6	31.3	320
xxxxxxx	13556	xxx	Han	woman	61	162	60	22.8624	7.9	7.68	1.53	7.11	1.42	4.45	76	3.71	47.15	78.69	140	90	1.38	1.19	Secondary specialized school	retire	xxxxxxxxxxx	2019-02-25	Heart center	38	xxxxxx	85	B	85	6.4	52.2	34.7	9.2	3.3	0.6	3.34	2.22	0.59	0.21	0.04	4.41	138	0.41	93.2	31.2	335
xxxxxxx	13573	xxx	Uygur	man	72	172	86	29.0698	4.57	5.27	0.17	2.44	0.84	1.28	171.3	6.6	79	314	155	105	1.01	0.34	middle school	retire	xxxxxxxxxxx	2019-02-26	Heart center	27	xxxxxx	110		80	5.77	62.2	22.9	8.3	5.7	0.9	3.59	1.32	0.48	0.33	0.05	4.49	135	0.41	92	30.5	326
xxxxxxx	13685	xxx	Uygur	man	59	179	80	24.968	5.67	5.52	5.05	5.95	0.84	3.26	20.1	6.1	55	399			1.21	1.23	undergraduate college	cadre	xxxxxxxxxxx	2019-03-02	Heart center	14	xxxxxx	118	not in detail	79	7.6	49.1	40.3	5.9	4.2	0.4	3.73	3.06	0.45	0.32	0.03	4.93	140	0.44	89.7	28.5	317
xxxxxxx	13674	xxx	Han	man	43	178	97	30.6148	4.73	4.97	2.71	5.43	0.71	3.05	44.7	4.4	93	265			0.51	1.82	middle school		xxxxxxxxxxx	2019-03-03	Heart center	7	xxxxxx	116	not in detail	70	8.96	64.6	26.7	6.4	1.8	0.3	5.79	2.39	0.57	0.16	0.03	4.98	159	0.45	97.2	31.9	329
xxxxxxx	13681	xxx	Uygur	man	55	167	60	21.5139	6.45	5.16	1.79	3.67	0.71	1.71	21.6	5.8	99	205	140	80	0.03	0.96	middle school	retire	xxxxxxxxxxx	2019-03-03	Heart center	19	xxxxxx	96	not in detail	54	7.38	53	38.3	4.7	3.3	0.4	3.91	2.83	0.35	0.24	0.03	4.91	146	0.45	92.5	29.7	322
xxxxxxx	13689	xxx	Han	man	56	174	81	26.7539	4.44	5.12	1.49	5.8	1.95	4.01	25.3	4.2	62	319			1.26	1.35	middle school	cadre	xxxxxxxxxxx	2019-03-04	Heart center	13	xxxxxx		not in detail	74	4.55	54.8	34.9	8.4	1.3	0.4	2.49	1.59	0.38	0.06	0.02	4.48	153	0.48	106.3	34.2	321
xxxxxxx	13667	xxx	Han	man	62	169	73	25.5593	5.07	5.44	3.3	5.4	1.08	4.18	22.1	4.8	61	317	150	105	1.1	1.35	Secondary specialized school	retire	xxxxxxxxxxx	2019-03-05	Heart center	28	xxxxxx	100	not in detail	63	5.35	64.8	26.7	6	2.1	0.2	3.47	1.43	0.32	0.11	0.01	4.63	138	0.4	87	29.8	342
xxxxxxx	13668	xxx	Uygur	man	60	170	63	21.7993	4.7	5.2	0.91	3.5	1.36	2.07	23.1	7.1	57	197	130	70	1.22	0.66	Secondary specialized school	farmer	xxxxxxxxxxx	2019-03-05	Heart center	25	xxxxxx	76	O型，Rh（+）	80	4.43	53.2	37.7	6.8	1.6	0.5	2.36	1.67	0.3	0.07	0.02	4.17	121	0.37	89.2	29	325
xxxxxxx	13669	xxx	Uygur	man	77	168	75	26.5731	3.58	5.04	1.67	4.55	1.36	3.01	24.4	6.4	102	310	145	90	1.31	1	Junior college	retire	xxxxxxxxxxx	2019-03-05	Heart center	30	xxxxxx	98	not in detail	84	7.8	58.4	30.8	7.1	3.1	0.5	4.56	2.4	0.55	0.24	0.04	4.68	140	0.42	89.3	29.9	335
xxxxxxx	13677	xxx	Uygur	man	33	175	83	27.102	6.17	5.4	1.49	2.28	0.86	1.43	39.5	8.2	86	310			0.98	0.58	Secondary specialized school	doctor	xxxxxxxxxxx	2019-03-05	Heart center	29	xxxxxx	98	not in detail	80	5.87	63.6	24.2	6.5	4.5	0.6	5.61	2.15	0.58	0.4	0.05	5.02	146	0.44	88.4	29.1	329
xxxxxxx	13667	xxx	Han	man	62	169	73	25.5593	5.07	5.44	3.3	5.4	1.08	4.18	22.1	4.8	61	317	150	105	1.1	1.35	Secondary specialized school	retire	xxxxxxxxxxx	2019-03-05	Heart center	28	xxxxxx	100	not in detail	63	5.35	64.8	26.7	6	2.1	0.2	3.47	1.43	0.32	0.11	0.01	4.63	138	0.4	87	29.8	342
xxxxxxx	13696	xxx	Han	man	62	165	68	24.977	5.63	5.5	1.39	3.82	1.11	2.07	237.84	66.7	63	331	150	100	1.24	0.95	middle school	worker	xxxxxxxxxxx	2019-03-06	Heart center	27	xxxxxx	68		74	6.42	56.1	30	7	5	0.5	306	1.98	0.45	0.32	0.03	4.59	137	0.4	87.8	29.8	340
xxxxxxx	13718	xxx	Han	woman	76	163	62	23.3355	4.7	5.5	1.08	5.34	1.11	3.46	136.98	4.7	54	307			1.34	1.39	Secondary specialized school	farmer	xxxxxxxxxxx	2019-03-06	Heart center		xxxxxx			66	6.97	49.6	39.6	7.6	3	0.3	3.45	2.78	0.53	0.21	0.02	4.99	138	0.43	80.2	27.7	325
xxxxxxx	13726	xxx	Han	woman	62	155	65	27.0552	12.68	7.51	2.47	2.83	0.56	1.03	367	5.56	59.12	245.89			1.31	0.63	Secondary specialized school	worker	xxxxxxxxxxx	2019-03-07	Heart center		xxxxxx			78	6.27	69.2	23	6.5	0.5	0.2	4.34	1.48	0.41	0.03	0.01	4.38	1.6	0.38	87	28	331
xxxxxxx	13695	xxx	Uygur	man	65	170	84	29.0657	5.82	5	1.07	3.15	1.15	1.68	35.82	5.48	64.42	263	120	80	1.71	0.46	Secondary specialized school	farmer	xxxxxxxxxxx	2019-03-07	Heart center	40	xxxxxx	82	not in detail	80	3.51	59.5	28.2	6.6	5.4	0.3	2.09	0.99	0.23	0.19	0.01	3.98	128	0.39	98.2	32.2	327
xxxxxxx	13746	xxx	Uygur	man	59	174	90	29.7265	12.99	8.97	2.25	4.91	1.18	3.58	807.54	7.21	59	321			1.14	1.16	Secondary specialized school	farmer	xxxxxxxxxxx	2019-03-07	Heart center	17	xxxxxx			80	8.93	54.1	76.1	4.8	4.3	0.4	4.83	3.22	0.43	0.38	0.04	4.99	1.45	0.42	83.8	29.1	347
xxxxxxx	13693	xxx	Han	woman	54	164	64	23.7954	5.76	5.88	1.68	6.42	1.1	4.59	123.7	40.7	64	303	140	88	1.36	1.72	Junior college	retire	xxxxxxxxxxx	2019-03-08	Heart center	27	xxxxxx			80	5.43	56.3	35.2	5.7	22	0.4	3.06	1.91	0.31	0.12	0.02	4.78	143	0.44	91.4	29.9	327
xxxxxxx	13698	xxx	Han	man	48	165	102	37.4656	8.49	7.36	3.02	4.83	0.93	3.19	21.7	3.46	51.3	272.99	160	110	1.09	0.99	Secondary specialized school	worker	xxxxxxxxxxx	2019-03-10	Heart center	53	xxxxxx	102	not in detail	92	6.95	54.6	34.8	9.2	1.3	0.1	3.79	2.42	0.64	0.09	0.01	5	154	0.45	89.4	30.8	345
xxxxxxx	13703	xxx	Uygur	man	52	167	93	33.3465	5.66	4.7	1.64	3.36	0.62	2.06	29.76	5.05	77.58	272.61	130	80	1.26	0.72	middle school		xxxxxxxxxxx	2019-03-10	Heart center	18	xxxxxx	102	not in detail	78	6.25	62.1	27	8.8	1.8	0.3	3.88	1.69	0.55	0.11	0.02	5.33	150	0.46	86.1	28.1	327
xxxxxxx	13812	xxx	Uygur	man	43	165	60	22.0386	10.53	7.27	7.65	4.81	0.8	1.93	11.1	5.13	86.17	310.95			1.56	1.76	Secondary specialized school	farmer	xxxxxxxxxxx	2019-03-10	Heart center	13	xxxxxx	90		87		59.3	33.9	5.9	0.5	0.4	5	2.86	6.5	0.04	0.03	4.89	145	0.43	88.5	29.7	335
xxxxxxx	13754	xxx	Han	man	66	160	69	26.9531	4.48	5.43	0.87	2.62	1.07	1.29	216.83	6.8	95	396			1.07	0.53	middle school	worker	xxxxxxxxxxx	2019-03-11	Heart center	20	xxxxxx	100		80	5.29	62.2	27.2	6.4	3.8	0.2	329	1.44	0.34	0.2	0.01	4.03	136	0.41	100.5	33.7	336
xxxxxxx	13750	xxx	Han	woman	65	167	60	21.5139	4.25	5.6	1.56	5	1.16	3.07	8177.27	6.6	50	178			1.42	1.2	illiterate	worker	xxxxxxxxxxx	2019-03-11	Heart center	16	xxxxxx	78		76	5.97	60.2	33.7	4.4	1.3	0.2	3.59	2.01	0.26	0.48	0.01	4.24	126	0.38	90.6	129.7	328
xxxxxxx	13759	xxx	Han	man	51	167	88	31.5537	4.82	5.44	1.98	3.7	1.03	2.29	271.38	6.9	85	372			1.1	0.89	middle school	office worker	xxxxxxxxxxx	2019-03-12	Heart center	21	xxxxxx	115		90	5.9	36.5	54.4	7.6	1	0.2	2.15	3.21	0.45	0.06	0.2	4.8	149	0.45	93.1	31	333
xxxxxxx	13565	xxx	Uygur	man	69	165	79	29.0174	5.65	5.6	2.107	4.76	0.94	2.91	82	7.9	64	357	210	110	1.24	1.18	Secondary specialized school	retire	xxxxxxxxxxx	2019-03-22	Heart center	17	xxxxxx	90	A	80	7.63	64.9	20.1	8.8	5.6	0.3	4.95	1.53	0.67	0.43	0.02	5.5	157	0.47	93.3	31.3	333
xxxxxxx	14281	xxx	Han	woman	60	164	79	29.3724	6.66	5.65	2.65	4.92	1.02	3.04	77.19	4.3	54	331	116	67	1.14	1.13	Secondary specialized school	worker	xxxxxxxxxxx	2019-04-24	Heart center	8	xxxxxx	90		85	5.84	63.7	29.8	3.8	1.9	0.3	3.72	1.74	0.22	0.11	0.02	4.09	125	0.404	98.8	30.6	309
xxxxxxx	14352	xxx	Uygur	woman	72	165	69	25.3444		5.73	0.51	2.77	1.41	1.3									middle school	retire	xxxxxxxxxxx	2019-05-09	Heart center	19	xxxxxx			78
xxxxxxx	14490	xxx	Han	man	68	150	73	32.4444	5.59	6.3	2.59	4.35	0.67	2.8	22.6	3.2	65	273	109	63	0.93	1.18	middle school	retire	xxxxxxxxxxx	2019-05-12	Heart center	28	xxxxxx			60	9.61	63.5	28.1	6.3	1.7	0.4	6.01	2.7	0.61	0.16	0.04	4.85	142	0.416	85.6	29.3	342
xxxxxxx	14450	xxx	Han	man	50	162	71	27.0538	5.9	5.54	2.41	4.05	0.81	2.64	28	6.4	59	317	108	68	1.14	0.62	Secondary specialized school	farmer	xxxxxxxxxxx	2019-05-13	Heart center	37	xxxxxx			88	6.27	46.1	42.1	5.4	5.6	0.3	2.89	2.64	0.34	0.35	0.02	4.88	144	0.44	90.2	29.5	327
xxxxxxx	14451	xxx	Uygur	man	54	166	60	21.7738	4.78	6.18	2.36	3.96	0.71	2.76	25.94	9.46	116.77	351.27	120	80	1.1	0.76			xxxxxxxxxxx	2019-05-14	Heart center	26	xxxxxx			68	6.98	71.2	18.7	6.2	3.6	0.3	4.96	1.3	0.43	0.25	0.02	4.86	147	0.43	88.5	30.2	342
xxxxxxx	14481	xxx	Han	man	75	158	61	24.4352	11.42	9.23	3.15	4.31	0.77	2.3	31.41	5.74	70.52	341.26	151	74	1.16	1.04	Secondary specialized school	farmer	xxxxxxxxxxx	2019-05-15	Heart center	12	xxxxxx			100	9.79	89.7	5	4.8	0.3	0.2	8.78	0.49	0.47	0.03	0.02	4.89	147	0.42	84.9	30.1	354.1
xxxxxxx	14494	xxx	Uygur	man	49	174	82	27.0842	4.54	5.54	1.26	5.12	0.9	3.82	25.9	6.5	71	383			1.07	1.23	civil servant		xxxxxxxxxxx	2019-05-18	Heart center	12	xxxxxx			68	8.36	61.4	24.8	8	5.1	0.5	5.13	2.07	0.67	0.43	0.04	5.94	185	0.53	89.2	31.1	349
xxxxxxx	14454	xxx	Han	man	52	163	64	24.0882	4.82	5.69	2.93	5.36	0.94	3.91	24.7	4.1	64	278	118	79	1.09	1.16	Junior college		xxxxxxxxxxx	2019-05-18	Heart center	16	xxxxxx			88	3.63	43.7	6.6	1.7	0.3	1.59	1.73	0.24	0.06	0.01	0.01	4.71	146	0.43	91.3	31	340
xxxxxxx	14505	xxx	Han	man	53	175	76	24.8163	3.96	5.17	1.04	2.86	0.63	1.87	159.83	5.2	71	286	0	0	0.85	1.1	middle school	staff	xxxxxxxxxxx	2019-05-19	Heart center	17	xxxxxx	120	AB	76	11.02	73.8	18	4.4	3.4	0.2	8.13	1.98	0.48	0.37	0.02	4.77	148	0.46	96.4	31	322
xxxxxxx	14458	xxx	Uygur	man	53	168	78	27.6361	4.45	5.34	2.1	3.94	0.9	2.61	23.3	5.7	101	307			1.14	1.4	Junior college		xxxxxxxxxxx	2019-05-19	Heart center	15	xxxxxx			86	6.25	56.3	33.9	6.6	2.7	0.5	3.52	2.12	0.41	0.17	0.03	4.43	128	0.4	90.3	28.9	320
xxxxxxx	14442	xxx	Uygur	woman	55	166	66	23.9512	8.59	7.76	2.52	3.84	1.17	2.01	26.19	4.07	56.16	224	130	80	1.15	0.67	Secondary specialized school		xxxxxxxxxxx	2019-05-19	Heart center	29	xxxxxx			75	6.29	50.1	36.4	7	6	0.3	3.15	2.29	0.44	0.38	0.02	4.82	135	0.4221	87.3	28	321
xxxxxxx	13294	xxx	Han	man	53	170	80	27.6817	4.25	5.31	0.89	3.15	1.02	1.98	168.44	6.4	74	269	130	80	1.09	1.03	Junior college	retire	xxxxxxxxxxx	2019-05-19	Heart center	11	xxxxxx			76	6.92	71.9	21	5.5	1.4	0.1	4.98	1.45	0.38	0.1	0.01	4.7	149	0.442	94	31.7	337
xxxxxxx	14487	xxx	Han	man	53	161	72	27.7767	4.25	5.31	0.89	3.15	1.02	1.98	34.2	6.4	74	269			1.09	1.03	retire		xxxxxxxxxxx	2019-05-19	Heart center	11	xxxxxx			76	6.92	71.9	21	5.5	1.4	0.1	4.98	1.45	0.38	0.1	0.01	4.7	149	0.442	94	31.7	337
xxxxxxx	14511	xxx	Han	woman	74	162	74	28.1969	12.46	7.37	1.27	6.03	1.89	3.39	150.55	12.55	82.56	414	200	110	1.89	0.93	illiterate	farmer	xxxxxxxxxxx	2019-05-20	Heart center	48	xxxxxx	100	B	70	6.7	60.2	30.2	7.2	1.8	0.6	4.03	2.02	0.48	0.12	0.04	4.4	136	0.401	91.3	30.8	338
xxxxxxx	14477	xxx	Han	man	73	163	64	24.0882	4.75	5.67	1.37	3.36	1.18	1.7	20.2	7	63	284			1.22	0.67	farmer		xxxxxxxxxxx	2019-05-20	Heart center	44	xxxxxx			56	6.1	60.4	26.2	7.8	4.9	0.7	3.68	1.6	0.48	0.3	0.04	4.3	138	0.396	91.9	31.9	347
xxxxxxx	14488	xxx	Han	man	33	176	85	27.4406	5.34	5.85	3.75	5.14	0.87	3.21	27.3	5.8	68	464	120	70	1.17	1.58	undergraduate college	policeman	xxxxxxxxxxx	2019-05-20	Heart center	37	xxxxxx				9.1	47.5	42.6	6.5	2.9	0.5	4.32	3.88	0.59	0.26	0.05	4.77	149	0.441	92.4	31.2	338
xxxxxxx	14638	xxx	Uygur	man	45	171	73	24.9649	4.28	5.32	1.39	3.35	0.82	2.15	487.18	4.6	62	330	264		1.05	0.9	Junior college	civil servant	xxxxxxxxxxx	2019-06-02	Heart center	12	xxxxxx	88		68	8.19	60.2	24.8	5.5	9	0.5	4.93	2.03	0.45	0.74	0.04	4.81	137	0.429	89.2	28.5	319
xxxxxxx	14709	xxx	Uygur	woman	48	172	80	27.0416	5.32	5.54	1.47	4.37	1.13	2.85	847.5	3.7	47	281	132	90	1.14	0.8	middle school	others	xxxxxxxxxxx	2019-06-12	Heart center	8	xxxxxx			69	7.25	63.9	26.1	7.2	2.1	0.7	4.63	1.89	0.52	0.15	0.05	4.3	122	0.375	87.2	28.4	285
xxxxxxx	15553	xxx	Uygur	man	74	170	60	20.7612	3.99	5.74	1.16	3.68	1.6	2.37	213	7.8	86	310	120	80	1.08	0.72	Secondary specialized school	farmer	xxxxxxxxxxx	2019-08-24	Heart center	46	xxxxxx	81	A	67	3.74	69	20.3	7.5	2.1	0.8	2.59	0.76	0.28	0.08	0.03	3.98	131	0.39	99.2	32.9	332
xxxxxxx	15663	xxx	Han	man	46	160	80	31.25	4.31	5.68	2.08	6.67	1.26	4.82	218.17	5.4	58	407	170	120	1.43	1.48	Junior college		xxxxxxxxxxx	2019-09-02	Heart center	44	xxxxxx	75	B	72	7.72	62.4	31.2	5.2	0.9	0.3	4.82	2.41	0.4	0.07	0.02	4.22	153	0.444	92.1	31.7	345
xxxxxxx	15684	xxx	Han	man	48	175	68	22.2041	6.06	5.75	2.41	3.53	0.95	1.95	45.09	5.2	53	290	110	56	1.26	0.79	university	office worker	xxxxxxxxxxx	2019-09-02	Heart center	31	xxxxxx	92	O	65	7.42	51	38.4	8.5	2	0.1	3.78	2.85	0.63	0.15	0.01	4.45	144	0.42	94.6	32.4	342
xxxxxxx	15667	xxx	Uygur	man	41	170	89	30.7958	6.4	5.84	2.74	5.37	0.74	3.65	444.36	6.47	64.58	323	120	79	1.02	1.18	Secondary specialized school		xxxxxxxxxxx	2019-09-03	Heart center	35	xxxxxx	66	O	90	6.5	55.2	32.2	9.5	2.8	0.3	3.59	2.09	0.62	0.18	0.02	5.62	160	0.46	81.1	28.5	351
xxxxxxx	15701	xxx	Han	man	52	174	73	24.1115	4.76	5.76	2.13	4.5	0.81	3.24	47.14	9.8	59	383	110	90	0.99	0.98	middle school	worker	xxxxxxxxxxx	2019-09-05	Heart center	6	xxxxxx	69	A	72	5.89	55.1	35.1	7.1	2.2	0.5	3.25	2.07	0.42	0.13	0.03	4.81	146	0.439	91.3	30.4	333
xxxxxxx	15658	xxx	Han	woman	65	165	62	22.7732	4.68	5.63	1.88	4.47	1.06	2.83	224.41	5.3	61	380	114	67	1.35	0.92	middle school	retire	xxxxxxxxxxx	2019-09-05	Heart center	29	xxxxxx	80	A	96	5.89	45.7	41.3	6.1	6.2	0.7	2.69	2.43	0.36	0.37	0.04	4.78	139	0.439	91.8	29.1	317
xxxxxxx	15708	xxx	Han	woman	52	165	65	23.8751	3.24	5.63	0.76	4.92	1.69	2.87	61.85	5.2	54	277	200	130	1.7	1.11	university	civil servant	xxxxxxxxxxx	2019-09-08	Heart center	9	xxxxxx	80	O	70	6.5	57.7	33.4	6.9	1.5	0.5	3.75	2.17	0.45	0.1	0.03	5.27	152	0.458	86.9	28.8	332
xxxxxxx	15841	xxx	Uygur	man	43	161	70	27.0051	11.7	8.83	1.32	3.21	0.87	1.85	190.32	4.5	60.52	317.57	100	60	0.95	0.6	undergraduate college	civil servant	xxxxxxxxxxx	2019-09-22	Heart center	26	xxxxxx			71	7.17	56.2	29.4	7	7.1	0.3	1.03	2.11	0.5	0.51	0.02	5.09	151	0.43	83.7	29.7	354
xxxxxxx	15976	xxx	Han	man	51	172	77	26.0276	4.45	5.65	2.84	3.96	0.86	2.24	154.4	4.7	88	350	145	90	1.35	0.74	Junior college	civil servant	xxxxxxxxxxx	2019-10-06	Heart center	2	xxxxxx	100	B	84	4.29	52.2	38.5	7.2	1.9	4.2	2.24	1.65	0.31	0.08	0.01	4.31	139	0.392	91	32.3	355
xxxxxxx	15997	xxx	Uygur	woman	59	165	80	29.3848	4.83	5.5	1.34	5.38	1.21	3.88	849.48	4.4	54	136			1.36	1.19	Junior college	retire	xxxxxxxxxxx	2019-10-07	Heart center	19	xxxxxx	105		78	7.34	46.1	41	9.5	2.7	0.7	3.38	3.01	0.7	0.2	0.05	4.58	133	0.419	91.5	29	317
xxxxxxx	16053	xxx	Uygur	man	58	173	85	28.4005	4.07	5.77	2.04	4.93	1.04	3.34	181.16	6	82	304	130	75	1.95	2.04	middle school	office worker	xxxxxxxxxxx	2019-10-07	Heart center	17	xxxxxx			80	6.34	40.5	47.5	7.7	3.2	1.1	2.57	3.01	0.49	0.2	0.07	5.08	152	0.458	90.2	29.9	332
xxxxxxx	16024	xxx	Han	woman	50	166	75	27.2173	4.55	6.4	0.98	4.33	1.45	3.22	132.03	2.06	43.63	229.76	100	60	1.55	0.6	undergraduate college	civil servant	xxxxxxxxxxx	2019-10-08	Heart center		xxxxxx		/	72	4.64	54.8	36	7.5	1.5	0.2	2.54	1.67	0.35	0.07	0.01	4.48	144	0.42	93.1	32.1	345
xxxxxxx	16039	xxx	Han	woman	46	165	72	26.4463	5.21	5.68	0.86	6.41	1.51	4.69	647.19	6.8	46	259	108	73	1.83	0.93	undergraduate college	doctor	xxxxxxxxxxx	2019-10-10	Heart center	44	xxxxxx		/	65	9.17	60.7	32.6	5.3	1.3	0.1	5.57	2.99	0.49	0.12	0.01	4.16	127	0.38	91.1	30.5	335
xxxxxxx	16043	xxx	Han	woman	59	163	67	25.2174	4.88	5.71	1.08	4.39	1.18	2.96	114.01	6.2	45	394	117	71	1.38	0.88	middle school	retire	xxxxxxxxxxx	2019-10-11	Heart center	33	xxxxxx	93	B	72	4.58	60.1	32.1	5	2.6	0.2	2.75	1.47	0.23	0.12	0.01	3.6	112	0.33	91.1	31.1	341
xxxxxxx	17060	xxx	Han	man	58	179	83	25.9043	9.47	7.67	2.4	4.08	1.48	2.2	221.77	4	63	362	200	110	1.58	0.85	Junior college	retire	xxxxxxxxxxx	2019-12-08	Heart center	50	xxxxxx	103	B	80	8.77	69.7	24.9	4.2	1.1	0.1	6.11	2.18	0.37	0.1	0.01	5.21	159	0.466	89.4	30.5	341
xxxxxxx	17044	xxx	Han	woman	43	162	78	29.7211	4.94	5.48	6.01	3.19	0.58	0.75	866.5	4.55	82.03	538.44	160	100	1.28	0.27	undergraduate college	teacher	xxxxxxxxxxx	2019-12-10	Heart center	7	xxxxxx		O	98	8.2	59.1	32.6	5.9	1.8	0.6	4.85	2.67	0.48	0.15	0.05	4.76	144	0.411	86.4	30.2	350
xxxxxxx	17058	xxx	Han	man	51	180	91	28.0864	5.11	5.61	1.89	4.94	0.94	3.24	223.55	5.1	74	524	120	80	1.11	1.09	undergraduate college	civil servant	xxxxxxxxxxx	2019-12-12	Heart center	41	xxxxxx	109	A	64	5.37	59.6	32.2	5.4	2.2	0.6	3.2	1.73	0.29	0.12	0.03	3.83	126	0.375	97.9	32.9	336
xxxxxxx	17061	xxx	Han	woman	79	159	61	24.1288	5.78	5.82	1.49	4.61	1.1	2.83	217.44	5.5	72	400	160	90	1.19	0.93	illiterate		xxxxxxxxxxx	2019-12-12	Heart center	6	xxxxxx			81	8.19	64.3	27	6.2	2.1	0.4	5.27	2.21	0.51	0.17	0.03	4	122	0.36	90	30.5	339
xxxxxxx	17052	xxx	Uygur	woman	65	155	60	24.974	5.26	5.56	1.16	3.45	1.17	1.92	424.55	4.2	50	250	120	60	1.29	0.7	Secondary specialized school	farmer	xxxxxxxxxxx	2019-12-14	Heart center	18	xxxxxx	102	B	72	7.11	63.6	29.1	5.5	1.5	0.3	4.52	2.07	0.39	0.11	0.02	4.21	121	0.384	91.2	28.7	315
xxxxxxx	17023	xxx	Han	woman	77	158	60	24.0346	5.37	5.33	1.54	4.36	1.15	2.74	521.64				160	95	1.2	0.89	middle school	retire	xxxxxxxxxxx	2019-12-14	Heart center	20	xxxxxx	90		75	10.13	50.3	40.3	8.3	0.8	0.3	5.1	4.08	0.84	0.08	0.03	4.05	124	0.37	90.6	30.6	338
xxxxxxx	17036	xxx	Han	man	46	164	69	25.6544	3.64	5.66	3.63	4.63	1.19	2.55	46.29	5.9	78	310	160	100	1.4	1.25	undergraduate college	office worker	xxxxxxxxxxx	2019-12-15	Heart center	12	xxxxxx			72	7.29	45.4	46	5.8	2.5	0.3	3.31	3.35	0.42	0.18	0.02	5.14	164	0.486	94.6	31.9	337
xxxxxxx	17057	xxx	Han	woman	70	160	64	25	4.66	5.45	2.73	5.91	1.12	3.88	215.95	7	58	295	140	85	1.6	1.34	illiterate	farmer	xxxxxxxxxxx	2019-12-15	Heart center	35	xxxxxx	90		72	4.38	56.4	36.1	6.2	1.1	0.2	2.47	1.58	0.27	0.05	0.01	4.14	131	0.4	96.6	31.6	328
xxxxxxx	17026	xxx	Han	woman	76	155	50	20.8117	7.97	7.37	1.76	5.37	1.46	3.33	70.27	11.4	88	347	180	100	1.83	0.48	middle school	retire	xxxxxxxxxxx	2019-12-15	Heart center	4	xxxxxx	85		62	5.39	47.8	44	5.8	2	0.4	2.58	2.37	0.31	0.11	0.02	4.14	138	0.412	99.5	33.3	335
xxxxxxx	17030	xxx	Han	woman	75	157	55	22.3133	5.85	5.39	2.45	6.38	1.36	3.74	298	5.45	61.9	214	145	64	1.68	1.05	Secondary specialized school	retire	xxxxxxxxxxx	2019-12-15	Heart center	18	xxxxxx	90		92	7.54	65.8	26.3	6.5	1.3	0.1	4.96	1.98	0.49	0.1	0.01	4.8	145	0.44	91.9	30.2	329
xxxxxxx	17070	xxx	Han	man	58	170	85	29.4118	4.83	5.6	1.32	3.87	0.94	2.37	47.78	6.2	93	318	170	110	1.09	0.82	undergraduate college	civil servant	xxxxxxxxxxx	2019-12-16	Heart center	29	xxxxxx	129	O	80	6.77	70.4	22.7	5	1.8	0.1	4.77	1.54	0.34	0.12	0.01	4.42	140	0.407	92.1	31.7	344
xxxxxxx	17064	xxx	Uygur	man	63	170	71	24.5675	7.04	8.1	2.16	4.35	0.64	2.89	139.05	5.29	75.68	287	120	80	0.95	1	Junior college	retire	xxxxxxxxxxx	2019-12-17	Heart center	6	xxxxxx	86		72	7	57.2	31.4	8	3.1	0.3	4	2.2	0.56	0.22	0.02	4.56	138	0.4	87.5	30.3	346
xxxxxxx	17198	xxx	Han	man	56	174	83	27.4145	21.3		1.93	3.59	1.03	2.51	56.27								middle school	others	xxxxxxxxxxx	2019-12-24	Heart center	20	xxxxxx	96		72	5.56	62.6	28.8	6.8	1.4	0.4	3.48	1.6	0.38	0.08	0.02	4.83	145	0.42	87.2	30	344
xxxxxxx	17173	xxx	Uygur	man	36	172	78	26.3656	4.01	4.95	2.66	3.3	0.91	2.4	652.1	5.1	61	393	120	80	1.03	0.72	illiterate	farmer	xxxxxxxxxxx	2019-12-25	Heart center	7	xxxxxx	98		75	7.69	56.8	35	5.7	2.2	0.3	4.37	2.69	0.44	0.17	0.02	5.14	156	0.439	85.4	30.4	355
xxxxxxx	17169	xxx	Han	man	64	174	82	27.0842	4.71	5.43	1.49	3.47	0.98	1.96	45.36	2.8	71	410			1.12	0.67	middle school	retire	xxxxxxxxxxx	2019-12-25	Heart center	19	xxxxxx	105		72	6.65	48	40.3	7.4	4.1	0.2	3.19	2.68	0.49	0.27	0.01	4.74	153	0.442	93.2	32.3	346
xxxxxxx	17199	xxx	Han	man	52	168	63	22.3214	4.62	5.2	1.71	3.92	1.92	2.37	91.6	3.4	87	306.7			1.69	0.58	undergraduate college	civil servant	xxxxxxxxxxx	2019-12-25	Heart center	28	xxxxxx	90		62	4.67	45.6	45.8	7.7	0.9	0	2.13	2.14	0.36	0.04	0	4.74	161	0.458	96.6	34	352
xxxxxxx	17175	xxx	Han	man	69	180	84	25.9259	4.49	5.19	2.74	3.64	0.98	2.66	94.5	6	87	373.2	120	75	1.13	0.77	middle school	retire	xxxxxxxxxxx	2019-12-25	Heart center	14	xxxxxx	100		78	6.61	56.6	28.2	8.8	5.6	0.6	3.87	1.92	0.6	0.38	0.04	5.08	107	0.341	67.1	21.1	314
xxxxxxx	17179	xxx	Han	man	69	174	74	24.4418	4.14	5.33	1.23	3.26	1.19	1.72	221.73	4.4	68	406	120	70	1.4	0.57	Secondary specialized school	farmer	xxxxxxxxxxx	2019-12-25	Heart center	12	xxxxxx	92		50	5.64	59	34.4	4.6	1.9	0.2	3.33	1.94	0.26	0.1	0.01	4.86	154	0.462	95.1	31.7	333
xxxxxxx	17210	xxx	Uygur	woman	53	158	69	27.6398	5.17	5.71	1.36	5.06	1.05	3.38	199.92	5.6	58	252	130	80	1.11	1.2	illiterate	farmer	xxxxxxxxxxx	2019-12-28	Heart center	21	xxxxxx	92		82	5.67	58.7	33.5	6.2	1.2	0.4	3.33	1.9	0.35	0.07	0.02	4.33	132	0.395	91.2	30.5	334
xxxxxxx	17237	xxx	Han	woman	65	160	61	23.8281	5.55	5.77	2.31	4.04	0.88	2.37	209.66	7.3	62	274	150	902	1.23	0.95	middle school	retire	xxxxxxxxxxx	2019-12-29	Heart center	31	xxxxxx	90		85	7.37	71.6	20.5	5.7	1.8	0.4	5.28	1.51	0.42	0.13	0.03	4.59	139	0.423	92.2	30.3	329
xxxxxxx	17211	xxx	Uygur	woman	53	153	60	25.6312	3.54	5.53	1.11	3.94	0.86	2.49	239.13	4	54	264			0.93	0.94	Secondary specialized school	farmer	xxxxxxxxxxx	2019-12-29	Heart center	25	xxxxxx	89		72	6.15	58.2	30.9	8	2.6	0.3	3.58	1.9	0.49	0.16	0.02	4.15	130	0.394	94.9	31.3	330
xxxxxxx	17216	xxx	Han	man	53	180	93	28.7037	4.6	5.84	2.15	5.13	0.89	3.44	30.9	6.4	76	286	128	87	1.16	1.17	研究生	Enterprise management personnel	xxxxxxxxxxx	2019-12-29	Heart center	18	xxxxxx	104		72	9.66	67.6	25.5	4.9	2	0	6.53	2.46	0.47	0.19	0	4.97	154	0.45	90.7	31	341
xxxxxxx	17206	xxx	Han	man	78	168	65	23.03	4.68	5.46	0.56	2.65	1.18	1.16	205.06	5.7	66	333			1.09	0.45	middle school	retire	xxxxxxxxxxx	2019-12-29	Heart center	38	xxxxxx	90		60	7.26	49.9	40.9	6.6	1.9	0.6	3.62	2.97	0.48	0.14	0.04	4.26	128	0.39	92.3	30	326
xxxxxxx	17215	xxx	Han	woman	68	158	60	24.0346	5.16	5.8	1.02	3.67	1.75	1.65	258.23	66	74	358	120	60	1.45	0.61	middle school	retire	xxxxxxxxxxx	2019-12-29	Heart center	7	xxxxxx	92		70	6	46.7	46.8	4.7	1.5	0.3	2.8	2.81	0.28	0.09	0.02	4.5	138	0.408	90.7	30.7	338
xxxxxxx	17213	xxx	Han	man	41	173	75	25.0593	3.87	5.59	0.91	3.73	1.3	2.04	29.48	6.7	83	241			1.29	0.58	middle school	operate	xxxxxxxxxxx	2019-12-29	Heart center	35	xxxxxx	98		75	7.5	50.2	40.4	6.8	1.9	0.7	3.77	3.03	0.51	0.14	0.05	4.99	160	0.475	95.2	32.1	337
xxxxxxx	17231	xxx	Han	man	41	175	75	24.4898	5.15	5.73	0.88	2.55	0.89	1.21	477.83	5.2	98	289			0.86	0.59	Junior college	teacher	xxxxxxxxxxx	2019-12-29	Heart center	5	xxxxxx	93		76	9.26	62.3	21.5	14.5	1.5	0.2	5.77	1.99	1.34	0.14	0.02	5.24	154	0.474	90.5	29.4	325
xxxxxxx	17228	xxx	Han	woman	46	160	60	23.4375	4.71	5.29	0.65	5.1	1.51	2.79	278.87	4.84	51.2	153			1.47	0.88	undergraduate college	clerical worker	xxxxxxxxxxx	2019-12-30	Heart center	32	xxxxxx	89		75	6.86	53.2	39.4	4.8	2.2	0.4	3.65	2.7	0.33	0.15	0.03	4	121	0.362	90.5	30.3	334
xxxxxxx	17212	xxx	Han	man	60	173	69	23.0546	5.01	4.96	2.29	3.02	0.51	1.62	31.24	5.65	80.73	402			0.79	0.67	Secondary specialized school	farmer	xxxxxxxxxxx	2019-12-30	Heart center	43	xxxxxx	94		84	4.52	19.9	70.6	9.3	0.2	0	0.9	3.19	0.42	0.01	0	4.75	148	0.43	91.2	31.2	342
xxxxxxx	17257	xxx	Han	man	65	161	62	23.9188	7.19	7.99	3.47	4.54	0.77	2.28	17.87			6.21	145	95	1.1	0.84		retire	xxxxxxxxxxx	2019-12-31	Heart center	45	xxxxxx			72	6.52	68.7	25	5.4	0.6	0.3	4.48	1.63	0.35	0.04	0.02	4.92	151	0.43	88.2	30.7	348
xxxxxxx	17291	xxx	Uygur	man	47	180	88	27.1605	3.39	5.42	1.08	4.72	0.99	3.12	391.42	4.4	66	274			1.05	1.01			xxxxxxxxxxx	2020-01-01	Heart center	14	xxxxxx			78	9.77	47.6	43.3	7.5	1.3	0.3	4.65	4.23	0.73	0.13	0.03	4.54	149	0.452	99.6	32.8	330
xxxxxxx	17306	xxx	Uygur	woman	68	162	75	28.578	12.81	8.08	0.7	3.34	0.85	2.21	20.8	5.43	69.19	329.49			0.84	0.71			xxxxxxxxxxx	2020-01-01	Heart center	6	xxxxxx			65	8.3	64.9	24.7	9.6	0.2	0.6	5.39	2.05	0.8	0.02	0.05	4.24	131	0.304	85.6	30.8	360
xxxxxxx	17255	xxx	Han	man	42	172	77	26.0276	4.4	5.19	2.21	4.64	1.22	2.54	229.17	4.1	84	3.35	110	70	1.27	0.92		office worker	xxxxxxxxxxx	2020-01-01	Heart center	13	xxxxxx			76	10.08	53.2	32.7	8.8	4.4	0.9	5.36	3.3	0.89	0.44	0.09	6.59	143	0.454	68.9	21.7	315
xxxxxxx	17261	xxx	Han	man	53	160	69	26.9531	4.88	5.96	0.79	3.48	1.44	2.35	91.07	4.94	63.13	306.17	160	60	1.32	0.64		farmer	xxxxxxxxxxx	2020-01-02	Heart center	40	xxxxxx			86	6.77	62.5	30.3	6.8	0.3	0.1	4.23	2.05	0.46	0.02	0.01	4.19	134	0.39	93.6	32	342
xxxxxxx	17254	xxx	Han	man	55	180	126	38.8889	4.37	5.26	1.23	3.3	0.91	1.79	205.44	4.3	86	473	200	130	1.03	0.65			xxxxxxxxxxx	2020-01-02	Heart center	47	xxxxxx			78	7.51	45.8	44.7	7.1	2.3	0.1	3.44	3.36	0.53	0.17	0.01	5.34	157	0.458	85.8	29.4	343
xxxxxxx	17289	xxx	Uygur	man	72	165	66	24.2424	6.98	6.24	1.43	4.52	0.97	2.87	272.26	4.1	63	279			1.05	0.85			xxxxxxxxxxx	2020-01-04	Heart center	7	xxxxxx			72	7.21	59.7	31.1	49	3.9	0.4	4.3	3.24	0.35	0.28	0.03	4.86	142	0.432	88.9	29.2	329
xxxxxxx	17310	xxx	Uygur	woman	52	160	74	28.9062	4.5	5.52	0.73	3.7	1.04	2.3	10.1	6.02	92.73	174			1.13	0.77			xxxxxxxxxxx	2020-01-05	Heart center	18	xxxxxx			82	9.21	68.6	21.9	9	0.5	0	6.32	2	0.83	0.005	0	5.05	104	0.35	69.5	20.6	296
xxxxxxx	17308	xxx	Han	man	57	176	95	30.6689	4.81	5.53	3.76	4	0.63	2.08	0.55	4.6	67	387			0.95	0.94			xxxxxxxxxxx	2020-01-05	Heart center	8	xxxxxx			65	4.6	67	387	4.81	2.33	3.776	4	0.63	2.08	0.95	0.94	62.93	0.55	18.8	6.49	12.31	64.5
xxxxxxx	17311	xxx	Uygur	man	59	180	88	27.1605	4.64	5.4	1.89	2.71	0.9	1.35	10.9	5.2	86	313			1	0.04			xxxxxxxxxxx	2020-01-06	Heart center	38	xxxxxx			82	7.66	47.6	40.7	10.3	1	0.4	3.65	3.12	0.79	0.08	0.03	144	0.43	86.1	28.7	32.3	346
xxxxxxx	17305	xxx	Han	man	44	171	80	27.3588	7.65	7.75	1.67	3.25	1.07	1.89	20.58	4.61	98	322.2	90	60	1.15	0.62			xxxxxxxxxxx	2020-01-06	Heart center	25	xxxxxx			55	10.46	90.3	9.2	0.5	0	0	9.45	0.96	0.05	0	0	4.92	146	0.42	86.2	29.7	344
xxxxxxx	17309	xxx	Han	man	46	160	72	28.125	4.66	5.65	1.63	4.58	1.52	2.71	7.7	5.3	81	440			1.52	0.51			xxxxxxxxxxx	2020-01-06	Heart center	49	xxxxxx			70	5.03	52.2	40.4	5.4	1.6	0.4	2.63	2.03	0.27	0.08	0.02	4.16	132	0.382	91.8	31.7	346
xxxxxxx	17359	xxx	Han	man	71	170	59	20.4152	4.66	5.18	0.61	4.14	1.59	2.31	24.2	0.8	87	368	125	62	1.43	0.78	illiterate	retire	xxxxxxxxxxx	2020-01-09	Heart center	18	xxxxxx	73	AB	72	4.2	54.3	36.2	7.4	1.9	0.2	2.28	1.32	0.37	0.08	0.01	4.79	156	0.466	97.3	32.6	335
xxxxxxx	17737	xxx	Han	woman	73	150	51	22.6667	10.79	8.65	3.95	8.18	0.85	5.58	199.87	4.01	73.89	225	180	100	0.99	1.64	middle school	retire	xxxxxxxxxxx	2020-02-11	Heart center	2	xxxxxx	70	O	72	4.7	53.4	35.1	6.6	3.2	1.7	2.51	1.65	0.31	0.15	0.08	3.87	117	0.38	96.9	30.2	312
xxxxxxx	17739	xxx	Han	woman	78	150	45	20	5.3	5.68	1.23	4.87	1.06	3.01	125	4.4	68	268	180	100	1.09	1.14	Secondary specialized school	not in detail	xxxxxxxxxxx	2020-02-11	Heart center	40	xxxxxx	70	A	68	7.98	61.3	27.8	10	0.8	0.1	4.89	2.22	0.8	0.06	0.01	4.22	127	0.374	88.6	30.1	340
xxxxxxx	17734	xxx	Han	woman	72	165	82	30.1194	7.53	8.07	1.9	4.98	1.26	2.93	1072.8	5.1	47	196	180	110	1.54	0.73	middle school	retire	xxxxxxxxxxx	2020-02-12	Heart center	39	xxxxxx	90	A	84	7.45	54.2	36.8	5.9	2.7	0.4	4.04	2.74	0.44	0.2	0.03	4.37	136	0.49	95.9	31.1	325
xxxxxxx	17809	xxx	Han	woman	68	160	61	23.8281	5.73	5.56	1.63	4.19	0.77	2.73	542.5	6.9	61	441	160	70	0.93	0.86	middle school	retire	xxxxxxxxxxx	2020-02-15	Heart center	41	xxxxxx	75	O	80	7.76	50.6	40.6	5	3.5	0.3	3.93	3.15	0.39	0.27	0.02	4.22	133	0.407	96.4	31.5	327
xxxxxxx	17874	xxx	Uygur	man	56	165	70	25.7117	4.5	5.36	1.09	3.76	0.92	2.29		7.6	65	357	141	81	1.05	0.46	Junior college	teacher	xxxxxxxxxxx	2020-02-16	Heart center	24	xxxxxx			82	5.55	54.8	29.9	9.4	5.4	0.5	3.04	1.66	0.52	0.3	0.03	5.15	153	0.443	86	29.7	345
xxxxxxx	17797	xxx	Han	woman	61	157	68	27.5873	9.84		1.11	3.79	1.31	1.99	55				120	95			middle school	retire	xxxxxxxxxxx	2020-02-16	Heart center	39	xxxxxx	90	AB	78
xxxxxxx	17814	xxx	Han	woman	68	156	60	24.6548	4.5	4.93	1.14	4.03	1.12	2.55	89.6	4.7		340	160	90	1.42	0.91	Secondary specialized school	civil servant	xxxxxxxxxxx	2020-02-17	Heart center	10	xxxxxx	66	A	80	5.86	57	29	8.4	4.4	1	3.34	1.7	0.49	0.76	0.06	4.36	120	0.38	87.8	27.5	313
xxxxxxx	18001	xxx	Uygur	man	65	178	101	31.8773	1.63	7.47	1.71	3.68	1	2.09	7.7	5.2	68	246	220	160	1.08	0.75	Secondary specialized school	worker	xxxxxxxxxxx	2020-02-23	Heart center	31	xxxxxx	116	O	88	8.21	65.5	24.5	8	1.8	0.2	5.38	2.01	0.66	0.15	0.02	4.48	148	0.422	94.2	33	351
xxxxxxx	18047	xxx	Han	woman	64	166	77	27.9431	2.53	6.6	2.07	6.03	1.42	4.07	125.69	5.1	66	241	250	100	1.5	1.14	Secondary specialized school	retire	xxxxxxxxxxx	2020-02-23	Heart center	19	xxxxxx	87		78	5.78	41.5	46.5	9.7	2.1	0.2	2.4	2.69	0.56	0.12	0.01	3.73	117	0.34	91.7	31.4	342
xxxxxxx	17917	xxx	Han	man	49	179	87	27.1527	4.89	5.87	1.78	4.41	0.96	2.96		5	94	304	116	78	1.15	0.94	undergraduate college		xxxxxxxxxxx	2020-02-24	Heart center	42	xxxxxx			71	6.87	68.6	25.8	4.2	1	0.4	4.71	1.77	0.29	0.07	0.03	5.27	150	0.47	88.6	28.5	321
xxxxxxx	18000	xxx	Uygur	man	69	165	70	25.7117	7.1	7.61	1.71	3.78	0.72	2.56	401.7	6.22	111.49	202	220	180	0.79	0.82	middle school	retire	xxxxxxxxxxx	2020-02-24	Heart center	28	xxxxxx	92	O	70	6.27	61.1	23	12.8	2.1	1	3.83	1.44	0.8	0.13	0.06	4.3	121	0.38	87.9	28.1	320
xxxxxxx	18052	xxx	Uygur	woman	49	160	85	33.2031	4.96	5.36	1.15	4.21	1.02	2.5	87.34				170	94			middle school	not in detail	xxxxxxxxxxx	2020-02-25	Heart center	28	xxxxxx	92		101	9.11	51.4	38.2	7.9	1.8	0.7	4.68	3.48	0.72	0.16	0.06	4.85	128	0.42	86.4	26.4	305
xxxxxxx	18006	xxx	Han	man	62	170	73	25.2595	5.11	5.74	0.64	3.68	1.3	2.2	10.6	5.6	63	219	145	90	1.24	0.6	Secondary specialized school	farmer	xxxxxxxxxxx	2020-02-25	Heart center	6	xxxxxx	90	A	96	6.8	59.1	32.8	5.4	2.4	0.3	4.02	2.23	0.37	0.16	0.02	4.34	151	0.426	98.2	34.8	354
xxxxxxx	17991	xxx	Uygur	man	44	185	101	29.5106	3.84	5.48	1.71	4.89	0.81	3.62	8.7	4.8	67	396	215	140	0.91	1	middle school	office worker	xxxxxxxxxxx	2020-02-26	Heart center	4	xxxxxx	95	A	80	8.66	39	46.4	9.1	5	0.5	3.38	4.02	0.79	0.43	0.04	5.2	159	0.461	88.7	30.6	345
xxxxxxx	17992	xxx	Uygur	woman	55	166	85	30.8463	4.38	5.56	1.23	4.15	0.88	2.82	8.7	5.2	42	230	170	110	1.02	0.93	Secondary specialized school	farmer	xxxxxxxxxxx	2020-02-26	Heart center	13	xxxxxx	100		77	7.95	50.7	37.5	4.9	6.3	0.6	4.03	2.98	0.39	0.5	0.05	5.03	135	0.415	82.5	26.8	325
xxxxxxx	18003	xxx	Han	man	66	165	62	22.7732	5.79	6.06	0.84	3.51	1.2	1.97	9.8	6.2	70	338	190	80	1.23	0.62	Junior college	retire	xxxxxxxxxxx	2020-02-26	Heart center	51	xxxxxx	73	A	58	5.58	52.5	30.5	10.9	5.7	0.4	2.93	1.7	0.61	0.32	0.02	4.67	140	0.402	86.1	30	348
xxxxxxx	18008	xxx	Han	man	41	165	70	25.7117	5.44	6.09	4.02	5.27	0.93	3.07	5.7	4.3	61	322	105	65	1.28	1.02	Secondary specialized school	farmer	xxxxxxxxxxx	2020-02-26	Heart center	19	xxxxxx	90	B	76	8.47	49.4	40	6.1	4.1	0.4	4.18	3.39	0.52	0.35	0.03	5.25	161	0.475	90.5	30.7	339
xxxxxxx	18048	xxx	Uygur	man	42	166	76	27.5802	4.02	5.13	1.16	2.52	0.64	1.55	169.8	2.7	57	252	136	71	0.84	0.46	Secondary specialized school	civil servant	xxxxxxxxxxx	2020-02-26	Heart center	26	xxxxxx	95	B	60	10.43	61.2	29.1	8.1	1.2	0.4	6.38	3.04	0.84	0.13	0.04	4.64	153	0.441	95	33	347
xxxxxxx	18041	xxx	Han	man	57	168	60	21.2585	4.77	5.86	1.51	5.32	1.28	3.48	607.85	4.7	60	320	130	80	1.29	1.34	middle school		xxxxxxxxxxx	2020-02-27	Heart center	4	xxxxxx	90		63
xxxxxxx	18049	xxx	Han	woman	65	160	53	20.7031	4.22	6.07	1.49	3.08	0.98	1.76	64.91	5.3	28	322	121	52	1.23	0.58	Secondary specialized school		xxxxxxxxxxx	2020-03-01	Heart center	35	xxxxxx	79		90	5.95	56.1	38.8	4.2	0.7	0.2	3.34	2.31	0.25	0.04	0.01	3.88	95	0.302	77.8	24.5	315
xxxxxxx	18091	xxx	Han	woman	69	159	75	29.6665	4.79	5.84	2.92	5.5	1.19	3.47	230.21	7	79	443	180	90	1.41	1.39	middle school	retire	xxxxxxxxxxx	2020-03-01	Heart center	38	xxxxxx	93	O	90	8.57	48.1	33.8	6.7	10.9	0.5	4.12	2.9	0.57	0.93	0.04	4.7	143	0.429	91.3	30.4	333
xxxxxxx	18100	xxx	Han	man	47	170	68	23.5294	3.68	5.33	0.79	3.39	1.46	1.69	133.9	5.7	54	183	141	62	1.64	0.5	middle school	office worker	xxxxxxxxxxx	2020-03-03	Heart center	23	xxxxxx	90	A	78	11.1	71.6	23.7	3.5	1.1	0.1	7.95	2.63	0.39	0.12	0.01	4.87	153	0.449	92.2	31.4	341
xxxxxxx	18136	xxx	Han	man	42	170	69	23.8754	5.62	4.97	3.77	4.67	0.63	2.87	91.06	2.25	66.19	283	120	80	0.93	0.99	middle school		xxxxxxxxxxx	2020-03-04	Heart center	5	xxxxxx	90	O	66	6.3	46.8	44.3	7.6	0.8	0.5	2.95	2.79	0.48	0.05	0.03	4.07	117	0.37	91.4	28.7	3.5
xxxxxxx	18109	xxx	Han	woman	75	164	49	18.2183	2.93	5.88	0.94	5.72	1.66	3.16	186.22	6.1	82.49	298.82	135	70	1.9	1.09	Secondary specialized school	retire	xxxxxxxxxxx	2020-03-05	Heart center	14	xxxxxx	90	B	74	4.8	61.3	28.8	8.5	0.8	0.6	2.94	1.38	0.41	0.04	0.03	3.76	1.23	0.39	104.3	32.7	314
xxxxxxx	18104	xxx	Han	woman	76	160	60	23.4375	7.53	7.67	1.62	3.57	0.93	2.08	508.81	3.11	52.42	447.16	145	77	1.54	0.97	Secondary specialized school	farmer	xxxxxxxxxxx	2020-03-05	Heart center	17	xxxxxx	85		88	7.09	72.1	19.7	7.5	0.6	0.1	5.11	1.4	0.53	0.04	0.01	5.06	142	0.45	89.5	28.1	313
xxxxxxx	18217	xxx	Han	man	47	178	87	27.4587	4.31	5.16	2.07	4.46	0.62	2.88		4.7	73	366			0.95	1.08	undergraduate college	cadre	xxxxxxxxxxx	2020-03-05	Heart center	40	xxxxxx			90	7.749	75.1	16.4	7.2	1.1	0.2	7.35	1.61	0.7	0.11	0.02	58.13	155	0.47	91.8	30.2	329
xxxxxxx	18234	xxx	Han	woman	52	160	58	22.6562	4.59	5.36	0.89	3.6	1.4	2.09		8.3	68	281	150	80	1.33	0.61	Secondary specialized school	retire	xxxxxxxxxxx	2020-03-10	Heart center	2	xxxxxx	85	0	60	4.31	43.8	47.8	6	1.9	0.5	1.89	2.06	0.26	0.08	0.02	3.97	128	0.379	95.5	32.2	338
xxxxxxx	10345	xxx	Han	man	59	165	69	25.3444	5.15	5.68	1.8	5.13	0.93	3.51	96.9	3.3	81	268			1.08	1.16	Secondary specialized school	worker	xxxxxxxxxxx	2020-03-10	Heart center	44	xxxxxx	85		70	6.2	48.5	36.6	12.9	1.7	0	3.03	2.27	0.8	0.11	0	4.31	139	0.42	96.7	32.3	334
xxxxxxx	18208	xxx	Han	woman	41	155	56	23.3091	3.73	5.83	0.71	3.25	1.3	1.76		3.7	49	212	88	46	1.26	0.49	middle school	farmer	xxxxxxxxxxx	2020-03-10	Heart center	37	xxxxxx	75	0	96	4.17	43.4	48.4	4.8	2.9	0.5	1.81	2.02	0.2	0.12	0.02	4.26	135	0.401	94.1	31.7	337
xxxxxxx	18229	xxx	Han	man	58	167	78	27.968	4.88	5.81	1.06	4.28	1.36	2.66		5.2	61	426	116	81	1.26	1.05	middle school	worker	xxxxxxxxxxx	2020-03-11	Heart center	11	xxxxxx			69	4.54	39.7	52	6.6	1.3	0.4	1.8	2.36	0.3	0.06	0.02	4.33	142	0.413	95.4	32.8	344
xxxxxxx	18216	xxx	Han	man	48	180	91	28.0864	4.65	5.22	1.59	3.66	1.09	2.09		4.8	54	388			1.23	1	undergraduate college	civil servant	xxxxxxxxxxx	2020-03-11	Heart center	10	xxxxxx	100	B	72	6.23	81.3	13.8	3.9	0.8	0.2	5.06	0.86	0.24	0.05	0.01	4.5	145	0.428	95.1	32.2	339
xxxxxxx	18285	xxx	Uygur	man	47	160	70	27.3437	5.24	5.96	2.61	3.63	1.07	1.84		6.2	90	331			1.56	0.63	middle school	worker	xxxxxxxxxxx	2020-03-12	Heart center	5	xxxxxx	100	AB	72	8.13	53.3	37.3	7.6	1.4	0.4	4.33	3.03	0.62	0.11	0.03	4.54	146	0.44	96.5	32.2	333
xxxxxxx	18304	xxx	Uygur	man	51	178	93	29.3524	4.54	5.62	1.52	4.65	0.88	3.3		5.6	67	293	107	63	0.98	1.01	Junior college	civil servant	xxxxxxxxxxx	2020-03-13	Heart center	37	xxxxxx			78	6.67	48.9	42.1	5.4	3	0.6	3.26	2.81	0.36	0.2	0.04	5.15	160	0.473	91.8	31.1	338
xxxxxxx	18326	xxx	Han	man	77	169	66	23.1084	5.09	5.5	1.68	4.12	1.19	2.51	13.7	5.1	91	285	125	60	1.23	0.8		retire	xxxxxxxxxxx	2020-03-13	Heart center	46	xxxxxx	90	A	76	6.06	44.3	43.7	6.1	5.6	0.3	2.68	2.65	0.37	0.34	0.02	5.5	167	0.488	88.7	30.4	342
xxxxxxx	18284	xxx	Han	man	60	161	62	23.9188	3.83	5.55	1.14	4.46	1.27	2.37		2.13	50.95	205.1	101	69	0.62	0.8	Junior college	civil servant	xxxxxxxxxxx	2020-03-13	Heart center	3	xxxxxx			76	8.27	73.9	16.4	9.6	0	0.1	6.141	1.36	0.79	0	0.01	4.87	142	0.44	89.9	29.2	324
xxxxxxx	18312	xxx	Uygur	woman	67	158	65	26.0375	9.7	8.16	2.83	2.69	1.28	1.25	8.16	5.69	41.22	174	110	70	1.16	0.32	Secondary specialized school	farmer	xxxxxxxxxxx	2020-03-14	Heart center	29	xxxxxx	80	AB	70	6.57	53.1	39.5	4.3	2.5	0.6	3.46	2.57	0.28	0.16	0.04	3.84	114	0.35	91.1	29.7	326
xxxxxxx	18265	xxx	Uygur	man	58	173	75	25.0593	4.66	4.94	1.17	3.32	0.91	1.83		7.3	88.02	263	120	70	0.86	0.52	undergraduate college		xxxxxxxxxxx	2020-03-15	Heart center	27	xxxxxx		AB	54	4.63	58.8	21.6	13	6	0.6	2.72	1	0.6	0.28	0.03	4.03	122	0.38	95	30.3	319
xxxxxxx	18279	xxx	Han	woman	72	153	65	27.7671	7.6	8.78	1.66	5.13	1.13	3.08		9.33	124.18	431.02	120	70	1.13	0.93	middle school	retire	xxxxxxxxxxx	2020-03-15	Heart center	19	xxxxxx		0	80	9.85	74	21.2	4.4	0.1	0.3	7.29	2.09	0.43	0.01	0.03	4.48	143	0.44	98.7	31.9	324
xxxxxxx	18283	xxx	Uygur	man	49	174	83	27.4145	6.37	5.01	1.98	5.01	0.92	3.1		2.03	53.66	292	123	85	1.3	1.02	undergraduate college	civil servant	xxxxxxxxxxx	2020-03-15	Heart center	1	xxxxxx			78	8.6	71.3	24.3	3.6	0.2	0.6	6.13	2.09	0.31	0.02	0.05	4.99	144	0.422	84.6	28.9	342
xxxxxxx	18318	xxx	Uygur	man	55	168	70	24.8016	4.84	5.88	1.7	4.75	0.96	3.15	15.9	6.7	72	339	133	75	1.13	1.12	university	office worker	xxxxxxxxxxx	2020-03-16	Heart center	51	xxxxxx	90		77	6.21	69.2	24	5.2	1.3	0.3	4.3	1.49	0.32	0.08	0.02	4.26	135	0.405	95.1	31.7	333
xxxxxxx	18308	xxx	Han	woman	64	172	67	22.6474	4.24	5.41	0.87	3.06	0.92	1.82	15.1	4.5	87	347	230	130	1.01	0.72	illiterate	farmer	xxxxxxxxxxx	2020-03-16	Heart center	6	xxxxxx	89	A	63	8.05	53.7	28.7	6.7	10.7	0.2	4.32	2.31	0.54	0.86	0.02	4.15	133	0.39	94	32	341
xxxxxxx	18309	xxx	Uygur	man	66	158	61	24.4352	5.18	5.31	1.33	5.477	1.01	3.6	8.2	4.45	42.95	143.7	120	70	1.25	0.86	middle school	retire	xxxxxxxxxxx	2020-03-16	Heart center	11	xxxxxx	8	AB	76	5.12	48.4	42.6	7.4	1.2	0.4	2.48	2.18	0.38	0.06	0.02	4.36	130	0.389	89.2	29.8	334
xxxxxxx	18315	xxx	Uygur	man	64	167	74	26.5338	5.19	5.1	1.32	3.35	0.88	2.26	11.65	4.12	63.2	332.34	180	90	1.23	0.56	Secondary specialized school	farmer	xxxxxxxxxxx	2020-03-16	Heart center	41	xxxxxx	105		80	7.85	75.9	18.2	4.7	1.1	0.1	5.96	1.43	0.37	0.09	0.01	4.36	138	0.4	91.7	31.7	345
xxxxxxx	18323	xxx	Uygur	man	48	159	63	24.9199	4.49	5.46	1.17	3	1.1	1.54	8.7	2.7	44	194	104	62	1.2	0.2	Junior college	retire	xxxxxxxxxxx	2020-03-16	Heart center	1	xxxxxx	82		75	9.74	66.6	26.6	5.6	1	0.2	6.49	2.59	0.55	0.1	0.02	4.5	144	0.42	93.3	32	343
xxxxxxx	18335	xxx	Han	woman	78	160	67	26.1719	5.96	5.76	1.8	4.31	1.48	2.86	9.5	5.5	48	205	220	120	1.74	0.78	middle school	retire	xxxxxxxxxxx	2020-03-16	Heart center	9	xxxxxx	89	A	80	6.91	58.3	30.1	8.7	2.2	0.7	4.03	2.08	0.6	0.15	0.05	4.28	129	0.39	92.1	30.1	327
xxxxxxx	18334	xxx	Han	woman	74	168	70	24.8016	4.37	5.37	1.02	7.72	0.81	5.85	6.6	4.1	68	301	120	80	0.83	1.96	middle school	retire	xxxxxxxxxxx	2020-03-16	Heart center	30	xxxxxx	92		90	9.83	55.9	33.1	8.3	2	0.7	5.49	3.25	0.82	0.2	0.07	5.09	143	0.45	89	28.1	316
xxxxxxx	18280	xxx	Han	man	49	170	89	30.7958	6.15	5.22	1.19	2.51	0.71	1.45		4.17	54.8	371.75	125	82	1.04	0.41	middle school	worker	xxxxxxxxxxx	2020-03-16	Heart center	29	xxxxxx	115	0	80	6.79	52	34.5	11	2.4	0.1	3.53	2.34	0.75	0.16	1.01	4.72	158	0.451	95.6	33.5	350
xxxxxxx	18333	xxx	Uygur	man	40	160	65	25.3906	4.39	5.32	0.94	3.61	0.81	2.4	4.8	4.5	57	222	122	66	0.9	0.44	middle school	teacher	xxxxxxxxxxx	2020-03-18	Heart center	1	xxxxxx	80		76	5.38	61.2	27.7	6.7	3.7	0.7	3.29	1.49	0.36	0.2	0.04	4.29	120	0.38	89.5	28	313
xxxxxxx	18327	xxx	Uygur	woman	73	170	62	21.4533	6.1	5.79	1.17	2.2	0.8	1.08	12	2.6	70	195	106	70	0.84	0.38	Secondary specialized school	farmer	xxxxxxxxxxx	2020-03-18	Heart center	31	xxxxxx	78		56	4.32	55.3	32.4	7.6	4.2	0.5	2.39	1.4	0.33	0.18	0.02	4.24	130	0.381	89.9	30.7	341
xxxxxxx	18338	xxx	Han	man	84	160	46	17.9687	2.97	5.12	0.67	2.94	1.06	1.72	157.63				180	90			Secondary specialized school	retire	xxxxxxxxxxx	2020-03-18	Heart center	21	xxxxxx	70		68
xxxxxxx	18337	xxx	Han	woman	70	160	70	27.3437	7.3	7.78	2.56	5	1.12	3.45	17.8	5.7	71	239.7	149	75	1.28	0.93	Secondary specialized school	retire	xxxxxxxxxxx	2020-03-18	Heart center	1	xxxxxx	87		66	5.36	58.4	32.3	7.6	1.3	0.4	3.13	1.73	0.41	0.07	0.02	4.95	149	0.435	87.9	30.1	343
xxxxxxx	18310	xxx	Uygur	man	61	172	80	27.0416	4.19	5.99	0.66	3.4	1.28	1.73	12.53	4.91	76.93	303	130	80	1.5	0.57	Junior college	retire	xxxxxxxxxxx	2020-03-19	Heart center	21	xxxxxx	95		76	9.05	64.5	28	5.9	0.9	0.7	5.84	2.53	0.53	0.08	0.06	5.16	154	0.47	90.7	29.8	329
xxxxxxx	18407	xxx	Han	woman	66	160	82	32.0312	5.28	5.59	1.75	4.83	1.34	3.04	154.78	4.3	49	296	160	105	1.46	1.12		not in detail	xxxxxxxxxxx	2020-03-22	Heart center	34	xxxxxx	95		80	7.65	63.4	27.3	5.6	3.3	0.4	4.85	2.09	0.43	0.25	0.03	4.28	123	0.374	87.4	28.7	329
xxxxxxx	18406	xxx	Han	woman	68	170	75	25.9516	4.82	5.98	1.02	2.2	0.95	0.92	108.95	4.8	68	310	160	90	1.03	0.4	middle school	retire	xxxxxxxxxxx	2020-03-23	Heart center	29	xxxxxx	93	A	80	6.19	56.4	33.1	6.8	3.4	0.3	3.49	2.05	2.42	0.21	0.02	4.75	148	0.404	85.1	31.2	366
xxxxxxx	18389	xxx	Uygur	man	65	168	62	21.9671	4.76	5.63	0.62	4.45	1.28	3	157.93	5.2	65	456	160	100	1.27	0.97		farmer	xxxxxxxxxxx	2020-03-24	Heart center	51	xxxxxx	80	O	93	6.13	71.8	19.2	7.2	1.6	0.2	4.4	1.18	0.44	0.1	0.01	4.69	150	0.432	92.1	32	347
xxxxxxx	18395	xxx	Uygur	woman	56	169	75	26.2596	6.29	5.53	0.74	1.58	0.68	0.64	105.56	6.31	93.44	291	100	70	0.57	0.34	Secondary specialized school	not in detail	xxxxxxxxxxx	2020-03-24	Heart center	15	xxxxxx	92		72	7.97	68.4	21.8	7.9	1.1	0.8	5.45	1.74	0.63	0.09	0.06	4.1	130	0.38	93.7	31.7	339
xxxxxxx	18404	xxx	Han	woman	65	158	65	26.0375	4.61	5.11	0.93	4.2	1.62	2.76	346.6	5.2	88	263.1	160	100	1.44	0.7	Secondary specialized school	retire	xxxxxxxxxxx	2020-03-24	Heart center	3	xxxxxx	86		76	6.49	67.1	26.7	5.5	0.5	0.2	4.35	1.73	0.36	0.03	0.01	4.16	130	0.387	93	31.3	336
xxxxxxx	18396	xxx	Han	man	75	155	60	24.974	6.13	5.47	1.86	4.09	1.13	2.24	107.71	3.83	64.88	226	105	60	1.15	0.71	Secondary specialized school	retire	xxxxxxxxxxx	2020-03-24	Heart center	31	xxxxxx	80		76	4.55	56.4	33	8.6	1.3	0.7	2.57	1.5	0.39	0.06	0.03	4.13	127	0.4	96.4	30.8	319
xxxxxxx	18403	xxx	Han	woman	73	164	55	20.4491	5.43	4.9	0.81	2.81	0.85	1.84	119	5.5	91	264	133	81	0.95	0.55		retire	xxxxxxxxxxx	2020-03-24	Heart center	4	xxxxxx			75	6.3	52.2	38.2	7.1	1.8	0.7	3.29	2.41	0.45	0.11	0.04	4.42	142	0.405	91.7	32.1	350
xxxxxxx	18390	xxx	Han	woman	73	165	95	34.8944	5.01	5.07	1.78	4.21	1.16	3.02	306.4	4.6	90	280.5	133	78	1.25	0.86	middle school	farmer	xxxxxxxxxxx	2020-03-24	Heart center	35	xxxxxx	105	A	60	8.24	58.2	30.6	8	24	0.8	4.8	2.52	0.66	0.2	0.07	5.39	158	0.47	87.4	29.3	335
xxxxxxx	18400	xxx	Han	woman	52	170	61	21.1073	4.94	5.58	2.01	5.63	1.04	3.91	167.54	5.7	66	424	110	70	1.13	1.19	Junior college	retire	xxxxxxxxxxx	2020-03-24	Heart center	9	xxxxxx	78		79	6.69	59.4	31.5	5.1	3.7	0.3	3.97	2.11	0.34	0.25	0.02	4.6	136	0.414	90	29.6	329
xxxxxxx	18120	xxx	Han	woman	60	165	60	22.0386	7.07	7.3	1.11	2.79	1.19	1.62	209.7	3.2	59	251.1	160	110	1.34	0.41	Secondary specialized school	accounting	xxxxxxxxxxx	2020-03-25	Heart center	1	xxxxxx	85	B	80	5.77	53	34.7	10.7	0.7	0.9	3.06	2	0.62	0.04	0.05	5.25	141	0.44	84.6	26.9	318
xxxxxxx	18486	xxx	Han	man	33	174	80	26.4236	4.5	5.87	2.18	5.46	1.17	3.67	9	5.3	94	288			1.32	1.08	Junior college	cadre	xxxxxxxxxxx	2020-03-28	Heart center	2	xxxxxx	105	A		7.6	52.2	38.2	5.5	3.8	0.3	3.97	2.9	0.42	0.29	0.02	5.25	165	0.467	89	31.4	353
xxxxxxx	18558	xxx	Uygur	woman	37	150	40	17.7778	4.92	5.44	1.25	5.25	1.11	3.74	290.34	5.2	43	316	123	60	1.16	1.13	Junior college	not in detail	xxxxxxxxxxx	2020-03-29	Heart center	13	xxxxxx	2.7	A	98	6.1	50.9	40.3	6.6	1.5	0.7	3.1	2.46	0.4	0.04	0.09	0	0	4.73	104	0.313	66
xxxxxxx	18530	xxx	Han	woman	57	163	84	31.6158	4.88	5.63	1.19	4.15	1.39	2.44	122.72	3.3	48	299	135	75	1.3	0.75	middle school	retire	xxxxxxxxxxx	2020-03-30	Heart center	39	xxxxxx	3.5	O	76	7.71	55	34.9	7.5	2.3	0.3	4.24	2.69	0.58	0.18	2.02	4.9	145	0.438	89.4	296	331
xxxxxxx	18529	xxx	Han	man	61	171	75	25.6489	4.35	5.46	1.1	2.69	1.12	1.27	203.57	4.1	70	515			1.12	0.54	Junior college	retire	xxxxxxxxxxx	2020-03-31	Heart center	5	xxxxxx	3.6			6.25	62.7	29.6	4	3.2	0.5	3.92	1.85	0.25	0.2	0.03	4.88	164	0.452	92.6	33.6	363
xxxxxxx	18531	xxx	Han	woman	72	160	65	25.3906	6.51	5.56	1.66	4.43	1.34	2.71	124.26	4.4	59	177	125	77	1.66	1.4	illiterate	retire	xxxxxxxxxxx	2020-04-01	Heart center	2	xxxxxx			68	4.98	59.5	33.7	5.6	0.8	0.4	2.96	1.68	0.28	0.04	0.02	4.06	133	0.393	96.8	32.8	339
xxxxxxx	18527	xxx	Uygur	man	59	170	85	29.4118	4.67	5.27	1.19	2.07	0.95	0.74	123.9	4.7	73	339			1.2	0.86	Secondary specialized school	养路人	xxxxxxxxxxx	2020-04-02	Heart center	26	xxxxxx	102	O	79	5.13	58.1	26.3	8.4	6.6	0.6	7.98	1.35	0.43	0.34	0.03	4.43	128	0.41	91.8	28.9	311
xxxxxxx	18973	xxx	Uygur	man	48	177	92	29.3658	4.65	5.73	3.53	4.82	1.2	3.25	626.3	4.2	93	488	180	130	1.25	1	middle school	farmer	xxxxxxxxxxx	2020-04-04	Heart center	46	xxxxxx			88	7.59	56.7	34.7	7.2	1.1	0.3	4.3	2.63	0.55	0.08	0.02	4.22	137	0.4	95.7	32.5	339
xxxxxxx	18556	xxx	Han	man	78	165	66	24.2424	5.95	4.27	0.93	3.91	0.85	2.25	68.02	5.83	78.51	269.76	119	69			Secondary specialized school	farmer	xxxxxxxxxxx	2020-04-06	Heart center	7	xxxxxx	69		76	7.3	70.2	22.7	0.3	0.5	0.3	5.12	1.66	0.46	0.04	0.02	5.12	164	0.52	99.4	31.7	318
xxxxxxx	18572	xxx	Han	woman	71	160	74	28.9062	3.97	4.69	1.47	5.04	1.22	3.45	297.79	5.2	60	314	160	70	1.65	2.65	Secondary specialized school	retire	xxxxxxxxxxx	2020-04-06	Heart center	14	xxxxxx	3	B	90	6.6	53.5	34.7	7.7	3.6	0.5	3.53	2.29	0.51	0.24	0.03	3.92	120	0.361	92.1	306	332
xxxxxxx	18569	xxx	Han	man	74	170	75	25.9516	4.53	5.71	0.89	2.2	1.07	0.96	110.04	7.8	60	344			1.21	0.66	middle school	retire	xxxxxxxxxxx	2020-04-06	Heart center	19	xxxxxx	36	ab	90	5.32	56.2	33.6	6.6	3.4	0.2	2.99	1.79	0.35	0.18	0.01	4.76	147	0.441	92.6	30.9	333
xxxxxxx	18553	xxx	Han	man	64	174	81	26.7539	4.54	5.55	1.57	4.63	0.99	3.02	86.63	3.7	48	310	124	99	1.17	1.03	Secondary specialized school	retire	xxxxxxxxxxx	2020-04-06	Heart center	28	xxxxxx			67
xxxxxxx	18570	xxx	Han	woman	59	161	58	22.3757	4.61	5.33	1.14	4.07	1.22	2.65	762.7	6.4	60	217	137	80			middle school	retire	xxxxxxxxxxx	2020-04-07	Heart center	38	xxxxxx	22	B	78	5.99	65.3	26.2	6	2.2	0.3	3.91	1.57	0.36	0.13	0.02	4.08	127	0.385	94.4	31.1	330
xxxxxxx	18578	xxx	Han	woman	76	166	60	21.7738	3.76		3.49	4.74	0.73	2.87	342.5					155			Secondary specialized school	retire	xxxxxxxxxxx	2020-04-07	Heart center	29	xxxxxx		间断胸痛4年		11	141	68	55
xxxxxxx	19089	xxx	Uygur	man	60	168	62	21.9671	4.57	5.26	1.19	3.32	1.33	1.64	161.08	4.57	2.06	1.16	120	82	1.39	0.57		staff	xxxxxxxxxxx	2020-04-20	Heart center	19	xxxxxx		A	78	6.42	58.5	30.2	5.1	5.9	0.3	3.76	1.94	0.33	0.38	0.02	5.2	156	0.452	86.9	30	345
xxxxxxx	19076	xxx	Han	woman	76	150	60	26.6667	7.08	7.09	1.5	4.16	0.88	2.6	381.01	6.87	2.3	0.58	200	110	1.09	0.87	Secondary specialized school	farmer	xxxxxxxxxxx	2020-05-02	Heart center	22	xxxxxx	99	AB	80	9.86	83.5	12.4	3.7	0.1	0.3	8.23	1.22	0.36	1.01	0.03	4.57	129	0.4	88.4	28.2	3.9
xxxxxxx	19028	xxx	Han	man	67	165	67	24.6097	5.89	5.85	1.1	3.28	0.81	1.65	528.3	5.89	2.65	1.1	174	108	0.92	1.03	Secondary specialized school	retire	xxxxxxxxxxx	2020-05-03	Heart center	31	xxxxxx	92		96	12.35	79.4	11.8	8.3	0.3	0.2	9.81	1.46	1.03	0.04	0.02	5.27	158	0.46	88	30	341
xxxxxxx	19046	xxx	Uygur	woman	72	160	83	32.4219	9.58	7.82	1.09	3.8	1.15	1.79	333.26	9.58	2.45	1.09	160	80	1.25	0.76	undergraduate college	retire	xxxxxxxxxxx	2020-05-03	Heart center	3	xxxxxx	93		76	7.45	60.3	31.8	4.8	2.7	0.4	4.49	2.37	0.36	0.2	0.02	4.35	123	0.389	128.3	189.4	316
xxxxxxx	19001	xxx	Han	woman	72	158	68	27.2392	7.43	7.29	1.47	3.24	0.96	1.87	312.52	7.43	1.92	1.47	220	100	1.13	0.55		retire	xxxxxxxxxxx	2020-05-04	Heart center	41	xxxxxx	90	AB	85	6.41	58.9	36.2	4.4	0.2	0.3	3.78	2.32	0.28	0.01	0.02	3.68	112	0.345	93.8	30.4	325
xxxxxxx	19027	xxx	Han	woman	76	160	64	25	9.13	7.71	2.46	6.37	1.15	4.18	338.42	9.13	2.34	2.46	160	90	1.05	1.46	illiterate	farmer	xxxxxxxxxxx	2020-05-04	Heart center	7	xxxxxx	70	O	65	8	76	15.4	5.6	2.5	0.5	6.08	1.23	0.45	0.2	0.04	3.83	123	0.39	100.5	32.1	319
xxxxxxx	19009	xxx	Han	man	64	170	64	22.1453	5.77	4.91	1.64	3.97	0.78	2.56	1044.5	5.77	1.71	1.64			0.92	0.97	Secondary specialized school	farmer	xxxxxxxxxxx	2020-05-04	Heart center	24	xxxxxx	85	B	72	10.17	91.1	7.5	0.9	0.3	0.3	9.26	0.76	0.09	0.02	0.03	5.02	161	0.46	92.2	32.1	348
xxxxxxx	19021	xxx	Uygur	woman	57	165	66	24.2424	4.52	4.63	1.34	5.22	1.25	3.37	731.18	4.52	1.43	1.34	130	75	1.12	1.02	Secondary specialized school	others	xxxxxxxxxxx	2020-05-05	Heart center	2	xxxxxx	80		76	5.69	58.8	32.9	6.2	1.6	0.5	3.35	1.87	0.35	0.09	0.03	4.28	121	0.373	87.1	28.3	324
xxxxxxx	19038	xxx	Han	woman	71	156	64	26.2985	10.68	8.12	1.38	4.78	1.49	2.84	103.65	10.68	2.75	1.38			1.34	0.89	middle school	retire	xxxxxxxxxxx	2020-05-05	Heart center	27	xxxxxx	80	B	68	8.51	53.5	34.7	8.6	2.7	0.5	4.55	2.95	0.73	0.23	0.04	4.08	130	0.39	95.8	31.9	332
xxxxxxx	18999	xxx	Han	woman	78	160	67	26.1719	5.72	4.97	3.04	5.34	0.89	3.49	267.5	5.72	1.77	3.14	140	90	1.13	1.36	middle school	retire	xxxxxxxxxxx	2020-05-05	Heart center	12	xxxxxx	84	O	88	5.83	52.6	39.6	4.5	3.1	0.2	3.07	2.31	0.26	0.18	0.01	4.11	129	0.387	94.2	31.4	333
xxxxxxx	19015	xxx	Han	woman	72	160	75	29.2969	4.77	4.92	1.33	4.57	1.53	2.78	371.83	4.77	1.76	1.33	190	110	1.54	0.91	illiterate	farmer	xxxxxxxxxxx	2020-05-05	Heart center	33	xxxxxx	95		84	5.89	60.7	28.5	8.8	1.5	0.5	3.58	1.68	0.52	0.09	0.03	4.26	132	0.43	10	31	310
xxxxxxx	19010	xxx	Han	man	53	168	79	27.9904	8.12	7.41	2.48	3.37	0.62	1.9	88.86	8.12	2.04	2.48	160	100	0.92	0.76	Secondary specialized school		xxxxxxxxxxx	2020-05-05	Heart center	26	xxxxxx	100	A	100	8.87	60	28.6	6.7	4.5	0.2	5.32	2.54	0.59	0.4	0.02	3.89	116	0.361	92.8	29.8	321
xxxxxxx	19014	xxx	Han	man	60	168	69	24.4473	5.33	5.02	1.39	4.05	0.88	2.63	130.79	5.33	1.82	1.39	148	100	0.94	0.54	Secondary specialized school	retire	xxxxxxxxxxx	2020-05-06	Heart center	30	xxxxxx	105	O	69	5.47	65.1	25.2	5.1	4.4	0.2	3.56	1.38	0.28	0.24	0.01	5.13	152	0.439	85.6	29.6	346
xxxxxxx	19056	xxx	Han	man	57	172	66	22.3094	5.39	4.94	0.72	3.31	0.9	2.03	119.29	5.39	1.74	0.72			1.01	0.73	Junior college	cadre	xxxxxxxxxxx	2020-05-06	Heart center	13	xxxxxx	87	AB	92	8.56	48.8	38.9	5.4	6.5	0.4	4.8	3.33	0.46	0.56	0.03	3.82	128	0.379	99.2	33.5	338
xxxxxxx	19029	xxx	Han	woman	46	160	60	23.4375	4.76	5.03	0.75	3.76	1.34	2.17	164.9	4.76	1.83	0.75	147	83	1.17	0.76		doctor	xxxxxxxxxxx	2020-05-06	Heart center	26	xxxxxx	78	B	93	4.34	45.6	43.3	8.1	2.5	0.5	1.98	1.88	0.35	0.11	0.02	3.61	102	0.316	87.5	28.3	323
xxxxxxx	19000	xxx	Han	man	49	169	83	29.0606	5.55	4.11	1.61	3.81	0.91	2.23	150.32	4.05	4.8	1.61			7.6	3.35	middle school	worker	xxxxxxxxxxx	2020-05-06	Heart center	38	xxxxxx	90	AB	68	8.23	60.7	32.1	5.8	0.7	0.7	5	2.64	0.48	0.06	0.06	5.12	147	0.43	84.8	28.7	339
xxxxxxx	19007	xxx	Han	woman	71	160	62	24.2187	14.93	8.42	3.02	5	1.02	3.23	130.36	14.93	3.05	3.02	134	76	1.08	1.1	Secondary specialized school	not in detail	xxxxxxxxxxx	2020-05-07	Heart center	14	xxxxxx	92	AB	79	4.59	47.7	32	18.5	1.1	0.7	2.19	1.47	0.85	0.05	0.03	4.68	137	0.42	89.5	29.3	327
xxxxxxx	19081	xxx	Uygur	man	50	178	93	29.3524	11.75	7.79	3.29	4.39	0.91	2.48	229.34	11.75	2.42	3.29			1.71	0.88	Secondary specialized school	worker	xxxxxxxxxxx	2020-05-07	Heart center	17	xxxxxx	125	B	97	7.21	43.6	46.2	6.8	2.1	0.3	3.14	3.4	0.49	0.15	0.02	4.99	140	0.418	83.8	28.1	335
xxxxxxx	19071	xxx	Uygur	man	63	170	70	24.2215	4.54	4.81	2.08	3.94	0.66	2.39	150.32	4.54	16.61	2.08			0.87	0.88	Secondary specialized school	farmer	xxxxxxxxxxx	2020-05-07	Heart center	36	xxxxxx	92		65	5.97	63	26.3	6.5	3.7	0.5	3.6	1.57	0.39	0.22	0.03	4.47	130	0.4	89	29.1	327
xxxxxxx	19006	xxx	Uygur	man	61	165	84	30.854	6.97	5.18	0.93	3.51	0.93	2.11	329.27	6.97	1.98	0.93			0.91	0.7	Secondary specialized school	farmer	xxxxxxxxxxx	2020-05-07	Heart center	10	xxxxxx	105	B	69	6.21	49.1	36.6	9.2	4.3	0.8	3.05	2.27	0.57	0.27	0.05	4.18	119	0.364	87.1	28.5	327
xxxxxxx	19054	xxx	Han	woman	72	158	66	26.4381	5.78	5.74	1.6	4.34	1.53	2.19	98.43	5.78	2.54	1.6	180	105	1.34	0.65	Secondary specialized school		xxxxxxxxxxx	2020-05-07	Heart center	7	xxxxxx	89	AB	81	5.8	63.5	25.5	84	1.9	0.7	3.68	1.48	0.49	0.11	0.04	3.74	118	0.36	96.3	31.6	328
xxxxxxx	19044	xxx	Han	woman	74	158	65	26.0375	11.29	9.04	3.78	4.89	0.94	3.13	72.14	11.29	3.67	3.78	170	90	1.1	1.02	middle school	retire	xxxxxxxxxxx	2020-05-07	Heart center	49	xxxxxx	78	O	78	5.89	57	32.3	8.1	2	0.3	3.37	1.9	0.48	0.12	0.02	4.29	132	0.39	91.6	30.8	336
xxxxxxx	19040	xxx	Han	man	76	170	85	29.4118	8.52	8.22	1.53	3.49	0.78	2.36	201.65	10.01	2.34	1.18	250	90	1.2	0.81	middle school	retire	xxxxxxxxxxx	2020-05-07	Heart center	5	xxxxxx	92		68	8.04	63.7	27.2	5.7	2.5	0.9	5.12	2.9	0.46	0.2	0.07	4.53	131	0.41	90.3	28.9	320
xxxxxxx	19058	xxx	Han	woman	64	162	64	24.3865	4.62	5.69	2.12	5.26	1.05	3.48	159.56	4.62	1.9	2.12	180	105	1.31	1.52			xxxxxxxxxxx	2020-05-09	Heart center	38	xxxxxx	86		60	6.36	52.6	40.7	4.9	1.3	0.5	3.35	2.59	0.31	0.08	0.03	5.38	121	0.379	70.4	22.5	319
xxxxxxx	19085	xxx	Uygur	woman	49	161	89	34.3351	3.94	5.64	1.86	3.55	1.03	2.1	224.04	3.94	2.44	1.86	250	110	1.4	0.75	Secondary specialized school	retire	xxxxxxxxxxx	2020-05-09	Heart center	28	xxxxxx		A	78	5.93	61.4	31	5.4	1.9	0.3	3.64	1.84	0.32	0.11	0.02	4.02	93	0.394	75.6	23.1	306
xxxxxxx	19067	xxx	Han	woman	61	171	80	27.3588	6.56	5.38	1.76	3.14	1.07	1.7	141.94	6.56	2.18	1.76			1.44	0.55	Secondary specialized school	retire	xxxxxxxxxxx	2020-05-09	Heart center	17	xxxxxx				7.83	68.5	28.7	3.3	1.4	0.1	5.36	2.09	0.26	0.11	0.01	4.14	136	0.384	92.8	32.9	354
xxxxxxx	19113	xxx	Uygur	man	56	162	62	23.6244	5.07	5.46	1.87	5.36	0.93	4.11	176	81	362.4	5.07	97				undergraduate college	teacher	xxxxxxxxxxx	2020-05-10	Heart center	44	xxxxxx	168	84		7.2		6.29	63.2	26.2	9.1	1	0.5	3.98	1.65	0.57	0.06	0.03	5.14	147	0.46	88.7
xxxxxxx	19078	xxx	Han	man	76	157	62	25.1532	5.2	5.5	1.69	3.48	1.07	2.15	190.35	5.2	2.3	1.69			1.7	0.75	middle school	retire	xxxxxxxxxxx	2020-05-10	Heart center	35	xxxxxx	88		60	6.46	53.6	33.4	9.9	2.6	0.5	3.46	2.16	0.64	0.17	0.03	4.34	139	0.44	101.2	34.4	339
xxxxxxx	19079	xxx	Han	man	51	168	87	30.8248	5.46	5.16	1.96	5.98	1.53	4.24	148.99	5.46	1.96	1.96			2.06	1.43	middle school	worker	xxxxxxxxxxx	2020-05-10	Heart center	38	xxxxxx	109	A	80	9.22	52.5	37.4	3.9	5.7	0.5	4.84	3.45	0.36	0.53	0.05	4.79	155	0.486	97.3	32.4	333
xxxxxxx	19073	xxx	Han	man	59	170	75	25.9516	8.47	9.04	6.14	4.71	0.86	2.82	60	8.47	3.67	6.14	180	100	1.05	0.89	Secondary specialized school	worker	xxxxxxxxxxx	2020-05-10	Heart center	6	xxxxxx	89		68	8.14	58.6	32.4	6.1	2.3	0.6	4.77	2.64	0.5	0.19	0.05	4.21	138	0.42	99	32.8	331
xxxxxxx	19102	xxx	Uygur	man	62	170	65	22.4913	7.89	7.15	1.44	3.85	0.65	2.71	171.02	7.89	1.78	1.44	150	100	0.8	1.04	middle school		xxxxxxxxxxx	2020-05-10	Heart center	8	xxxxxx	78	A	90	9.56	81.4	10.5	7.4	0.2	0.5	7.78	1	0.71	0.02	0.05	4.43	140	0.41	92.8	31.6	341
xxxxxxx	19077	xxx	Uygur	man	71	160	75	29.2969	5.05	5.62	3.05	2.89	0.61	1.46	173.3	5.05	2.42	3.05			1.43	0.79	middle school	retire	xxxxxxxxxxx	2020-05-10	Heart center	27	xxxxxx	98		70	5.69	65	27.4	4.6	2.8	0.2	3.7	1.56	0.26	0.16	0.01	5.38	157	0.459	85.6	29.3	342
xxxxxxx	19097	xxx	Uygur	man	53	180	100	30.8642	5.41	5.21	2.98	2.56	0.58	1.42	252.34	5.41	2.01	2.98	180	120	1.02	0.69	middle school	worker	xxxxxxxxxxx	2020-05-10	Heart center	3	xxxxxx	135	A	86	7.66	49.2	42	6.3	2.1	0.4	3.77	3.22	0.48	0.16	0.03	4.67	138	0.415	88.9	29.6	333
xxxxxxx	19111	xxx	Uygur	man	59	160	72	28.125	4.56	4.48	1.28	3.9	0.81	2.99	305.5	82	370.9	4.56	105				Secondary specialized school	farmer	xxxxxxxxxxx	2020-05-11	Heart center	37	xxxxxx	168	85		9.8		7.9	59.4		11.3	4.5	0.3	4.69	1.94	0.89	0.36	0.02	6.28	183	0.531	84.15
xxxxxxx	19090	xxx	Uygur	man	52	175	110	35.9184	7.09	7.32	2.97	3.77	1.01	2.38	166.47	7.09	1.95	2.97			1.1	0.79	illiterate	farmer	xxxxxxxxxxx	2020-05-11	Heart center	24	xxxxxx	120		78	5.86	48.8	37.5	9.4	3.4	0.9	2.86	2.2	0.55	0.2	0.05	6.23	184	0.52	83.9	29.5	352
xxxxxxx	19070	xxx	Han	man	55	168	89	31.5334	7.07	7.33	1.11	5.66	1.09	3.78	242.17	7.07	1.96	1.11	180	100	1.29	1.23	middle school	worker	xxxxxxxxxxx	2020-05-12	Heart center	9	xxxxxx	105	O	72	11.6	82.1	10.6	7.1	0.1	0.1	9.52	1.23	0.82	0.01	0.01	4.93	159	0.479	97.2	32.3	332
xxxxxxx	19092	xxx	Uygur	man	45	168	92	32.5964	4.1	6.95	8.17	3.19	0.68	0.83	593.9	4.1	3.75	8.17	170	130	1.79	1.23	middle school		xxxxxxxxxxx	2020-05-12	Heart center	33	xxxxxx	105		80	8.48	47.2	38.4	10.4	3.2	0.8	4	3.26	0.88	0.27	0.07	5.46	159	0.46	84.1	29.1	346
xxxxxxx	19356	xxx	Han	man	43	178	94	29.668	5.42	5.33	1.59	4.61	0.84	3.26	49.9	4.6	68	331	130	70	1.39	1.32	middle school	office worker	xxxxxxxxxxx	2020-05-24	Heart center	36	xxxxxx	109	O	68	5.93	53.3	34.4	7.4	4.4	0.5	3.16	2.04	0.44	0.26	0.03	4.59	155	0.464	101.1	33.8	334
xxxxxxx	19343	xxx	Han	man	62	160	65	25.3906	7.59	6.84	1.25	3.27	1.02	1.56	133	5.57	72.71	290.07	140	100	1.5	0.43	middle school	cleaner	xxxxxxxxxxx	2020-05-24	Heart center	7	xxxxxx	90	O	64	6.65	58	34.4	6.8	0.3	0.5	3.86	2.29	0.45	0.02	0.03	4.9	152	0.47	95.9	31	323
xxxxxxx	19342	xxx	Han	man	48	161	62	23.9188	10.8	7.46	3.41	4.17	0.85	2.03	281.59	8.06	60.78	212.93	160	100	1.45	0.56	Junior college	cadre	xxxxxxxxxxx	2020-05-24	Heart center	18	xxxxxx			81	9.21	65.4	24.8	8.5	0.9	0.4	6.02	2.28	0.78	0.08	0.04	5.19	162	0.461	88.8	31.2	351
xxxxxxx	19341	xxx	Han	man	51	160	66	25.7812	5.74	4.57	1.36	5.66	1.63	4.13	363.5	3.92	64.87	323	120	70	1.43	1.17	middle school		xxxxxxxxxxx	2020-05-24	Heart center	4	xxxxxx	68	O	66	6.22	67	23.3	9	0.2	0.5	4.17	1.45	0.56	0.01	0.03	4.88	164	0.489	100.2	33.6	335
xxxxxxx	19353	xxx	Uygur	man	54	173	93	31.0735	5.86	5.34	6.23	6.37	0.86	3.99	103.49	8.3	97	483.7	130	80	1.22	1.33	Junior college	civil servant	xxxxxxxxxxx	2020-05-24	Heart center	31	xxxxxx	92	O	96	5.67	68.6	20.8	7.8	2.6	0.2	3.89	1.18	0.44	0.15	0.01	4.65	152	0.446	95.9	32.7	341
xxxxxxx	19362	xxx	Uygur	man	68	171	67	22.913	4.29	5.72	1.52	5.51	1.42	3.92	254	10.5	83	354.6	105	100	1.27	1.16	Junior college	retire	xxxxxxxxxxx	2020-05-25	Heart center	6	xxxxxx	100		76	6.15	49.7	37.2	3.9	8.5	0.7	3.06	2.29	0.24	0.52	0.04	5	147	0.45	90	29.4	327
xxxxxxx	19339	xxx	Han	man	62	177	86	27.4506	4.48	5.3	3.64	3.85	1.07	2.49	96.2	6.7	90	474.4	100	60	1.33	0.79	Junior college	Professional and technical personnel	xxxxxxxxxxx	2020-05-25	Heart center	15	xxxxxx	118	A	72	4.99	55.7	33.5	8	2.6	0.2	2.78	1.67	0.4	0.13	0.01	4.81	150	0.445	92.5	31.2	337
xxxxxxx	19357	xxx	Han	man	67	179	110	34.331	4.45	5.79	1.48	4.79	0.96	3.43	359.4	7.3	97	399	170	95	1.13	1.24	Secondary specialized school	retire	xxxxxxxxxxx	2020-05-25	Heart center	18	xxxxxx	120		90	5.88	50.7	41	7.1	1	0.2	2.98	2.41	0.42	0.06	0.01	5.22	168	0.491	94.1	32.2	342
xxxxxxx	19358	xxx	Han	woman	65	163	95	35.756	7.59	7.63	2.04	5.2	1.12	3.35	417.02	5.6	94	418.7	150	90	1.29	1.08	Secondary specialized school	retire	xxxxxxxxxxx	2020-05-26	Heart center	13	xxxxxx	115	B	91	7.82	72.5	19.6	6.8	0.6	0.5	5.67	1.53	0.53	0.05	0.04	4.81	145	0.452	94	30.1	321
xxxxxxx	19371	xxx	Han	man	49	172	76	25.6896	4.13	5.56	0.86	3.93	0.88	2.88	267.48	4.6	73	362	129	77	0.92	0.83	Secondary specialized school	Professional and technical personnel	xxxxxxxxxxx	2020-05-26	Heart center	29	xxxxxx	96	B	80	6.89	49.6	41.4	7.5	1.2	0.3	3.42	2.85	0.52	0.08	0.02	4.72	150	0.455	96.4	31.8	330
xxxxxxx	19047	xxx	Han	man	69	170	75	25.9516	4.91	4.41	3.08	7.23	1.07	5.76	8.7	7.45	2.46	2.4	121	70	11.4	2.7	middle school	retire	xxxxxxxxxxx	2020-05-30	Heart center	30	xxxxxx	87	O	66	8.06	71.7		1.7	0.9	5.78	1.55	0.52	0.14	0.07	4.75	149	0.43	91.4	31.4	343	11.9
xxxxxxx	19903	xxx	Han	man	54	179	90	28.089	6.64	5.29	5.3	4.08	0.8	2.41	56.3	6.1	70	394.7	170	120	1.03	0.81	Junior college	administrative staff	xxxxxxxxxxx	2020-06-30	Heart center	14	xxxxxx			60	4.58	38.2	50	9.6	2	0.2	1.75	2.29	0.44	0.09	0.01	4.4	139	0.402	91.4	31.6	346
xxxxxxx	19958	xxx	Han	man	51	170	79	27.3356	4.97	4.84	0.97	2.81	0.65	1.7	154	7.85	65.58	499.39	180	120	0.84	0.49	middle school	driver	xxxxxxxxxxx	2020-07-06	Heart center	12	xxxxxx	105	O	92	5.49	51.1	38.6	8.9	0.9	0.5	2.81	2.12	0.49	0.05	0.03	4.31	135	0.383	88.9	31.3	352
xxxxxxx	20195	xxx	Han	woman	20	150	55	24.4444	3.74	5.24	0.49	3.7	1.4	2.46	81.83	6.2	55	362.2	100	60	1.08	2.74	Secondary specialized school	student	xxxxxxxxxxx	2020-07-21	Heart center	9	xxxxxx		A
xxxxxxx	20191	xxx	Han	man	69	167	74	26.5338	4.1	5.44	1.22	4.46	1.11	3	324.29	4.6	97	468	140	70	1.16	1.1	Secondary specialized school	farmer	xxxxxxxxxxx	2020-07-21	Heart center	14	xxxxxx		A	61	10.71	68.5	21.5	6.2	3.4	0.4	7.34	2.3	0.66	0.36	0.04	4.59	148	0.444	96.7	32.3	333
xxxxxxx	20209	xxx	Han	man	72	172	71	23.9995	8.87	7.97	1.89	3.14	0.82	2.05	220.2	8.8	122	534	180	100	0.087	0.71	middle school		xxxxxxxxxxx	2020-07-21	Heart center	37	xxxxxx	85		80	9.08	74.5	18.1	4.4	2.3	0.4	6.79	1.64	0.4	0.21	0.04	4.37	140	0.415	95	32	337
xxxxxxx	20202	xxx	Han	man	77	169	81	28.3604	4.14	5.23	1.21	3.7	0.85	2.52	207.45	3.5	84	514	145	68	1.13	1.32	Junior college	retire	xxxxxxxxxxx	2020-07-21	Heart center	11	xxxxxx	79	B	61	6.53	66.4	23.7	5.4	4.3	0.2	4.34	1.55	0.35	0.28	0.01	5.13	148	0.436	85	28.8	339
xxxxxxx	20196	xxx	Han	man	51	175	80	26.1224	7.34	7.49	1.31	2.61	0.84	1.71	39.88	3.6	76	508	110	70	0.8	0.52	Junior college	office worker	xxxxxxxxxxx	2020-07-23	Heart center	55	xxxxxx	84	B	76	8.87	70.6	22.4	4.5	1.8	0.7	6.26	1.99	0.4	0.16	0.06	4.73	145	0.42	88.8	30.7	345
xxxxxxx	20192	xxx	Han	man	59	175	75	24.4898	3.23	5.21	1.22	3	1	1.66	79.58	5.9	64	341	130	70	1.28	0.58	middle school		xxxxxxxxxxx	2020-07-23	Heart center	15	xxxxxx	77	A	64
xxxxxxx	20237	xxx	Han	man	55	175	84	27.4286	13.94	7.71	1	3.33	0.94	1.39	112.34	5.5	81	217.2	96	63	0.89	0.74	Secondary specialized school	civil servant	xxxxxxxxxxx	2020-07-23	Heart center	40	xxxxxx	84	B	81
xxxxxxx	20185	xxx	Han	woman	66	152	40	17.313	6.23	5.98	1.26	3.34	1.26	1.86	137.57	6.4	45	194	100	60	1.43	0.64	Secondary specialized school	retire	xxxxxxxxxxx	2020-07-24	Heart center	42	xxxxxx	76	O	60	4.81	42.8	48	7.3	1.5	0.4	2.06	2.31	0.35	0.07	0.02	4.62	125	0.386	83.5	27.1	324
xxxxxxx	20224	xxx	Han	man	60	174	70	23.1206	10.58	8.25	1.95	4.5	0.75	2.97	234.86	5.1	67	228	83	62	1.02	1.12	middle school		xxxxxxxxxxx	2020-07-25	Heart center	7	xxxxxx	75	B	72
xxxxxxx	20199	xxx	Han	man	48	174	103	34.0203	5.81	4.95	1.93	3.94	1.37	2.65	182.3	7.4	97	560.6	150	110	1.25	0.99	undergraduate college	office worker	xxxxxxxxxxx	2020-07-26	Heart center	9	xxxxxx	77	B	77	7.17	65.3	24.1	7.4	3.1	0.1	4.68	1.73	0.53	0.22	0.01	4.99	149	0.439	88	29.9	339
xxxxxxx	20198	xxx	Han	man	49	169	70	24.5089	4.78	5.78	2.3	4.27	0.91	2.81	88.02	6.6	74	270	150	100	1.16	1.29	middle school	office worker	xxxxxxxxxxx	2020-07-26	Heart center	6	xxxxxx	80	O	98	8.07	59.3	31.2	6.7	2.2	0.6	4.79	2.52	0.54	0.18	0.05	5.02	156	0.45	89.6	31.1	347
xxxxxxx	20197	xxx	Han	man	59	175	74	24.1633	4.68	5.42	2.64	4.57	1	2.89	77.18	5.7	68	406			1.29	1.31	middle school	administrative staff	xxxxxxxxxxx	2020-07-26	Heart center	5	xxxxxx	75	B	74	6.13	64.7	24.3	7.5	3.3	0.2	3.97	1.45	0.46	0.2	0.01	4.56	137	0.406	89	30	337
xxxxxxx	20236	xxx	Han	man	72	172	75	25.3515	4.31	5.58	1.25	4.57	1.04	3.24	680.1	4.4	77	330	125	79	1.06	1.29	middle school		xxxxxxxxxxx	2020-07-26	Heart center	29	xxxxxx	80		75
xxxxxxx	20201	xxx	Han	man	78	163	58	21.83	4.2	5.51	1.36	3.96	1.32	2.19	343.32	4.4	102	576	140	80	1.3	1.2	middle school	retire	xxxxxxxxxxx	2020-07-26	Heart center	26	xxxxxx	77	AB	50	6.79	67.6	22.1	4.9	5.3	0.1	4.59	1.5	0.33	0.36	0.01	4.06	131	0.386	95.1	32.3	339
xxxxxxx	20479	xxx	Uygur	woman	46	178	100	31.5617	3.79	5.14	0.78	2.28	0.97	1.23	134.9	3.3	56	245	180	100	1.21	0.95	Junior college	civil servant	xxxxxxxxxxx	2020-08-09	Heart center	25	xxxxxx	110	O	82	7.9	80.1	16.4	2.9	0.3	0.3	6.33	1.3	0.23	0.02	0.02	4.26	109	0.349	81.9	25.5	312
xxxxxxx	20452	xxx	Han	man	64	180	78	24.0741	4.28	5.48	1.55	3.51	0.81	2.31	153.78	6.3	79	310	190	90	1	0.93	middle school		xxxxxxxxxxx	2020-08-10	Heart center	35	xxxxxx			85	6.83	62.8	26.8	7.5	1.9	1	4.29	1.83	0.51	0.13	0.07	4.79	145	0.443	92.5	30.3	327
xxxxxxx	20489	xxx	Uygur	man	59	170	57	19.7232	4.6	4.45	0.92	4.14	2.09	2.58	226.64	4	80	181.5			0.97	0.66	Secondary specialized school	farmer	xxxxxxxxxxx	2020-08-14	Heart center	36	xxxxxx	62			10.08	76.8	15.6	6.8	0.6	2	7.74	1.57	0.69	0.06	0.02	3.86	123	0.364	94.3	31.9	338
xxxxxxx	20458	xxx	Han	man	55	168	60	21.2585	4.31	4.53	1.03	3.29	1.2	1.9	128	5.37	87.48	395.96	125	80	1.28	0.56	middle school		xxxxxxxxxxx	2020-08-15	Heart center	23	xxxxxx			68	6.21	61.7	30.6	4.7	2.7	0.3	3.83	1.9	0.29	0.17	0.02	5.09	159	0.467	91.7	31.2	340
xxxxxxx	20471	xxx	Han	man	63	170	80	27.6817	4.52	5.32	0.9	3.01	1.01	1.83	787.13	4.3	66	417	109	81	1.2	0.67	middle school	farmer	xxxxxxxxxxx	2020-08-16	Heart center	31	xxxxxx	105	A	80	6.48	66.4	20.5	901	3.5	0.5	4.3	1.33	0.59	0.23	0.03	4.39	141	0.404	92	32.1	349
xxxxxxx	20465	xxx	Han	woman	68	162	80	30.4832	3.67	5.84	1.76	6.01	1.53	4.28	108.69	3.7	55	223	200	110	1.87	1.78	Secondary specialized school		xxxxxxxxxxx	2020-08-16	Heart center	21	xxxxxx	98	Ｏ		7.27	65.1	26.5	6.2	1.8	0.4	4.73	1.93	0.45	0.13	0.03	4.52	140	0.423	93.2	31	331
xxxxxxx	20475	xxx	Han	woman	64	162	75	28.578	5	5.8	2.89	5.15	1.18	3.42	589.78	4	60	355	210	180	1.56	1.14	not in detail		xxxxxxxxxxx	2020-08-16	Heart center	46	xxxxxx	108	A	70	8.8	54.7	37.7	6.3	1	0.3	4.81	3.32	0.55	0.09	0.03	4.26	140	0.417	97.9	32.9	336
xxxxxxx	20460	xxx	Han	man	73	170	68	23.5294	5.82	4.84	0.51	4.51	1.2	3.16	280.64	6.3	97	203.4	139	71	0.92	1.04	middle school	farmer	xxxxxxxxxxx	2020-08-16	Heart center	9	xxxxxx	85		63	7.3	37	29.9	20.3	11.8	1	2.6	2.1	1.43	0.83	0.07	3.16	11.2	0.327	103.5	35.4	343
xxxxxxx	20486	xxx	Uygur	man	58	175	77	25.1429	5.75	4.6	0.92	3.3	0.82	2.15	177.65	6	88	310.9	108	60	0.99	0.69	undergraduate college	civil servant	xxxxxxxxxxx	2020-08-17	Heart center	25	xxxxxx	95	B	65	8.98	52.3	37.6	6.1	3.3	0.7	4.7	3.38	0.55	0.3	0.06	4.28	137	0.4	93.5	32	343
xxxxxxx	20462	xxx	Uygur	man	56	170	105	36.3322	4.88	5.3	2.06	4.02	0.7	2.94	187.91	4.5	72	386	220	130	0.97	1.05	Junior college	office worker	xxxxxxxxxxx	2020-08-17	Heart center	16	xxxxxx	108	O	77	6.89	57.8	28.6	9	4.2	0.4	3.98	1.97	0.62	0.29	0.03	4.77	148	0.441	92.5	31	336
xxxxxxx	20470	xxx	Uygur	man	72	180	58	17.9012	3.96	5.52	0.74	3.36	0.99	2.35	104.8	6.1	111	334	104	75	1.05	0.87	Secondary specialized school	farmer	xxxxxxxxxxx	2020-08-17	Heart center	36	xxxxxx	70		58
xxxxxxx	20481	xxx	Han	man	65	169	74	25.9095	4.7	4.61	0.68	4.29	1.42	2.39	133	4.63	65.4	279.28	145	95	1.38	0.6	middle school	office worker	xxxxxxxxxxx	2020-08-17	Heart center	13	xxxxxx	99		80	8.34	67.9	25.4	5.4	1.1	0.2	5.66	2.12	0.45	0.09	0.02	4.54	149	0.446	98.2	32.8	334
xxxxxxx	20487	xxx	Han	man	50	175	70	22.8571	4.9	5.77	1.48	3.38	0.85	2.36	212.05	3	78	275	120	75	1.09	0.9	undergraduate college	civil servant	xxxxxxxxxxx	2020-08-18	Heart center	31	xxxxxx	65	AB	74	7.34	53.7	37.1	6.9	2	0.3	3.94	2.72	0.51	0.15	0.02	518	165	0.47	90.7	31.9	351
xxxxxxx	20477	xxx	Han	man	52	170	81	28.0277	4.38	5.71	2.56	3.21	0.7	1.94	166	7.09	80.11	450.5	90	58	0.94	0.55	Secondary specialized school	worker	xxxxxxxxxxx	2020-08-18	Heart center	21	xxxxxx	102	AB	78	7.55	61	32.3	5.6	0.8	0.3	4.61	2.44	0.42	0.06	0.02	4.5	145	0.425	94.4	32.2	341
xxxxxxx	20636	xxx	Uygur	man	56	174	78	25.763	5.13	5.07	1.84	4.38	1.28	3.15	80.8	5.7	76	312.4	117	83	1.3	1.04	middle school	farmer	xxxxxxxxxxx	2020-08-23	Heart center	22	xxxxxx	92		90	9.16	68.2	22.8	5.9	2.3	0.8	6.25	2.09	0.54	0.21	0.07	4.82	146	0.432	89.6	30.3	338
xxxxxxx	20674	xxx	Han	man	53	168	70	24.8016	8.07	7.24	1.5	3.03	1.3	1.78	325.01	5.3	96	326.8	109	75	0.96	1.56	middle school	office worker	xxxxxxxxxxx	2020-08-24	Heart center	11	xxxxxx	85		88	13.21	70.1	9.5	2	0.9	0.8	9.26	2.31	1.25	0.26	0.12	4.7	156	0.444	94.5	33.2	351
xxxxxxx	20694	xxx	Han	man	53	167	75	26.8923	6.04	5.31	0.99	3.95	1.27	2.86	124.1	5.2	80	433.3	120	80	1.15	0.94	undergraduate college	retire	xxxxxxxxxxx	2020-08-25	Heart center	17	xxxxxx	90		100	8.53	49.5	40.3	7.7	1.6	0.9	4.22	3.44	0.66	0.14	0.08	6.06	189	0.546	90.1	31.2	346
xxxxxxx	20632	xxx	Uygur	man	77	173	70	23.3887	2.67	5.2	1.22	3.66	0.57	2.33	803.08	4.4	57	173	150	82	0.97	0.97	Junior college	retire	xxxxxxxxxxx	2020-08-26	Heart center	42	xxxxxx	32		78	5.94	45.7	43.1	7.6	2.9	0.7	2.71	2.56	0.45	0.17	0.04	5.2	155	0.452	86.9	29.8	343
xxxxxxx	20676	xxx	Uygur	man	50	173	70	23.3887	6.38	5.6	8.65	5.88	0.72	2.9	415.16	5.07	58.37	318	128	68	1.15	1.03	Secondary specialized school	farmer	xxxxxxxxxxx	2020-08-27	Heart center	4	xxxxxx	100		80	7.6	56	31.4	7.5	4.4	0.7	4.26	2.34	0.57	0.33	0.05	5.1	156	4.76	93.4	306	328
xxxxxxx	20668	xxx	Han	man	64	175	96	31.3469	10.71	8.37	0.71	2.16	0.81	1.29	412	4.8	30	188			0.93	0.57	illiterate	retire	xxxxxxxxxxx	2020-08-27	Heart center	33	xxxxxx	105		85	9.56	60.4	28.5	9	1.6	0.5	5.77	2.72	0.86	0.15	0.05	4.42	146	0.414	93.7	33	353
xxxxxxx	20673	xxx	Han	woman	59	172	90	30.4218	5.77	5.79	1.51	3.71	1.74	2.02	89.6	5.2	71	283.8			1.48	0.72	illiterate		xxxxxxxxxxx	2020-08-30	Heart center	8	xxxxxx	110	O	60	7.41	65.4	29.3	3.9	0.7	0.7	4.85	2.17	0.29	0.05	0.05	4.58	137	0.398	86.9	29.9	344
xxxxxxx	20670	xxx	Uygur	woman	35	156	67	27.5312	4.75	5.32	1.07	4.74	2.18	2.82	38.42	4	60	190			1.6	0.98	Junior college	office worker	xxxxxxxxxxx	2020-08-30	Heart center	41	xxxxxx	100	AB	76	4.75	47.7	42.9	6.3	2.5	0.6	2.27	2.04	0.3	0.12	0.03	447	130	0.389	87	29.1	334
xxxxxxx	20678	xxx	Uygur	man	65	167	69	24.7409	3.9	5.22	1.32	2.77	0.88	1.79	0.88	3.5	61	341			1.05	0.86	Junior college	office worker	xxxxxxxxxxx	2020-08-30	Heart center	6	xxxxxx	80		80	5.96	62.7	24	10.1	3	0.2	3.47	1.43	0.6	0.18	0.01	4.36	140	0.396	90.8	32.1	354
xxxxxxx	20675	xxx	Han	woman	70	164	71	26.398	5.35	5.24	1.13	3.35	1.04	2.53	70.69	5.6	52	313			1.07	0.92	middle school	retire	xxxxxxxxxxx	2020-08-30	Heart center	24	xxxxxx	88		60	5.15	64.9	27.8	5.4	1.7	0.2	3.34	1.43	0.28	0.09	0.01	4.22	122	0.466	86.7	28.9	333
xxxxxxx	20663	xxx	Han	man	78	166	71	25.7657	6.12	6.01	1.56	3.29	1.06	2.09	63.56	9.7	99	371			1.16	0.73	middle school	retire	xxxxxxxxxxx	2020-08-30	Heart center	8	xxxxxx	105	B	90	4.08	60.5	32.4	3.9	2.7	0.5	2.47	1.32	0.16	0.11	0.02	4.54	147	0.422	93	32	348
xxxxxxx	20930	xxx	Han	man	48	177	72	22.9819	13.82	8.17	3.75	3.14	0.94	1.57	432.17	10.1	142	233.2	130	80	1.41	0.43	4	farmer	xxxxxxxxxxx	2020-09-15	Heart center	32	xxxxxx	112	0	93	7.63	86.7	11.9	0.8	0.1	0.5	6.62	0.91	0.06	0.01	0.04	3.43	106	0.32	93.3	30.9	331
xxxxxxx	20929	xxx	Han	man	59	169	82	28.7105	5.36	4.97	1.31	3.24	0.94	2.09	335	6.9	65	250	130	73	0.96	0.74	2	retire	xxxxxxxxxxx	2020-09-22	Heart center	27	xxxxxx	98	A	73	6.16	37.4	48.9	9.7	3.4	0.6	2.3	3.01	0.6	0.21	0.04	4.46	145	0.429	96.2	32.5	338
xxxxxxx	20932	xxx	Han	man	46	170	65	22.4913	2.16	4.79	1.93	4.25	1.02	2.98	594.69	3.72	74.31	214.09		110	1.01	1	4		xxxxxxxxxxx	2020-09-23	Heart center	47	xxxxxx	87	AB	61	6.18	64.7	26.4	6.8	1.3	0.8	4	1.63	0.42	0.08	0.05	4.91	154	0.441	89.8	31.4	349
xxxxxxx	21062	xxx	Han	woman	70	160	73	28.5156	5.03	7.37	0.93	3.15	0.99	2.33	155.32	5.8	95	342	180	100	1.02	0.56	2	retire人员	xxxxxxxxxxx	2020-10-13	Heart center	29	xxxxxx	108		85	5.95	69.6	21.7	6.4	1.8	0.5	4.14	1.29	0.38	0.11	0.03	4.14	124	0.386	93.2	30	321
xxxxxxx	21060	xxx	Han	woman	59	167	58	20.7967	5.36	5.51	0.75	4.12	1.42	2.49	68.35	6.2	53	199	110	70	1.43	0.71	6	office worker	xxxxxxxxxxx	2020-10-14	Heart center	20	xxxxxx	83		88
xxxxxxx	21110	xxx	Han	man	60	173	102	34.0807	6.53	4.84	3.12	5.06	1.26	3.46	181.72	5.4	97	464			1.34	1.2	5	not in detail	xxxxxxxxxxx	2020-10-19	Heart center	31	xxxxxx	122	A	112	5.8	53.3	37.4	7.1	1.7	0.5	3.09	2.17	0.41	0.1	0.03	4.98	154	0.448	90	30.9	344
xxxxxxx	21108	xxx	Han	man	55	172	75	25.3515	6.38	5.63	1.4	4.4	1.71	2.91	890.47	5.52	82.95	440.33	150	100	1.5	0.81	4	retire	xxxxxxxxxxx	2020-10-20	Heart center	14	xxxxxx	96		60	5.35	56.6	29.2	9.7	3.2	1.3	3.03	1.56	0.52	0.17	0.07	4.88	161	0.471	96.5	33	342
xxxxxxx	21111	xxx	Han	man	51	170	80	27.6817	5.28	5.46	0.72	3.6	1.16	2.3	86.64	7.3	81	497	110	65	1.03	0.89	5	civil servant	xxxxxxxxxxx	2020-10-21	Heart center	49	xxxxxx	110		76	10.2	57.1	33.8	7	1.7	0.4	5.82	3.45	0.71	0.17	0.04	3.92	129	0.394	100.5	32.9	327
xxxxxxx	21270	xxx	Han	woman	71	156	52.9	21.7373	4.52	4.84	1.04	4.01	0.89	2.04	89.87	3.74	59.6	326	190	100	1.01	0.95	4	retire	xxxxxxxxxxx	2020-10-29	Heart center	39	xxxxxx	6	19	84	6.26	67.4	2.49	6.9	0.3	0.65	4.22	1.56	0.43	0.02	0.03	5.08	141	0.445	87.6	27.8	317
xxxxxxx	21277	xxx	Han	man	48	172	67	22.6474	4.56	5.28	0.64	4.17	1.18	2.9	184.51	4.6	71	384			0.96	1.05	5	cadre	xxxxxxxxxxx	2020-11-01	Heart center	16	xxxxxx	90	0	78	5.1	55.8	31.2	6.3	6.5	0.2	2.85	1.59	0.32	0.33	0.01	4.35	132	0.392	90.1	30.3	337
xxxxxxx	21291	xxx	Han	man	71	176	72	23.2438	4.73	5.41	0.9	4.76	1.4	3.39	798.18	7.2	84	356			1.1	0.96		retire	xxxxxxxxxxx	2020-11-01	Heart center	28	xxxxxx	99		70	4.78	60.4	26.8	5.9	6.5	0.4	2.89	1.28	0.28	0.31	0.02	4.57	142	0.431	94.3	31.1	329
xxxxxxx	21296	xxx	Han	man	77	167	64	22.9481	4.66	5.8	1.46	4.64	0.87	3.55	92.95	7.5	112	215	160	90	0.87	0.91	4	retire	xxxxxxxxxxx	2020-11-02	Heart center	21	xxxxxx	96		59	5.47	69	23.7	4.9	1.9	0.5	3.96	1.36	0.28	0.11	0.5	3.98	126	0.384	96.5	31.7	328
xxxxxxx	21442	xxx	Han	man	50	170	84	29.0657	10.33	7.66	2.81	3.98	0.92	2.81	267.83	6.68	87.25	365.85	150	130	1.61	0.8	3	retire	xxxxxxxxxxx	2020-11-02	Heart center	8	xxxxxx	94		87	7.37	57.8	35.6	4.9	1.2	0.4	4.26	2.62	0.36	0.09	0.03	4.03	149	0.447	92.3	30.8	334
xxxxxxx	21334	xxx	Uygur	woman	67	168	65	23.03	11.18	8.75	1.86	6.39	1.37	4.29	98.92	5.51	57.35	196.06	183	95	1.38	1.23	2	retire	xxxxxxxxxxx	2020-11-03	Heart center	27	xxxxxx	90		84	6.32	54.7	33.9	7.4	2.7	1.3	3.46	2.14	0.47	0.17	0.08	4.7	131	0.411	87.4	27.9	3
xxxxxxx	21342	xxx	Uygur	man	48	160	71	27.7344	4.87	5.33	1.43	4.35	0.98	3.03	124.36	5.4	60	285	180	120	1.09	1.1	3	office worker	xxxxxxxxxxx	2020-11-03	Heart center	3	xxxxxx	102		81	8.49	46.8	40.8	7.3	3.8	1.3	3.97	3.46	0.62	0.32	0.11	5.36	164	0.494	92.2	30.6	332
xxxxxxx	21288	xxx	Han	man	40	175	77	25.1429	9.18	8.67	1.89	3.72	1.145	2.31	715.1	5.2	96	309	150	110	1.15	0.73	5	office worker	xxxxxxxxxxx	2020-11-03	Heart center	37	xxxxxx	120		80	7.69	57.6	33.8	4.7	3.5	0.4	4.43	2.6	0.36	0.27	0.03	5.2	154	0.443	85.2	29.6	384
xxxxxxx	21319	xxx	Han	man	45	172	81	27.3797	5.98	5.96	1.52	2.87	0.94	1.68	96.43	4.1	65	330	160	110	0.89	0.76	5	cadre	xxxxxxxxxxx	2020-11-03	Heart center	11	xxxxxx	106		68	8.38	70.1	23.7	5.1	0.7	0.4	5.87	1.99	0.43	0.06	0.03	5.16	160	0.46	89.1	31	348
xxxxxxx	21324	xxx	Han	man	74	160	65	25.3906	10.24	7.47	1.02	4.88	0.99	3.6	343.36	6.13	73.64	261.7	190	100	1.15	1	1	retire	xxxxxxxxxxx	2020-11-04	Heart center	23	xxxxxx	87		74	5.62	65.2	26	7.1	1.2	0.5	3.66	1.46	0.4	0.07	0.03	5.56	161	0.492	88.5	29	327
xxxxxxx	21551	xxx	Han	man	58	172	75	25.3515	13.67	9.93	2.15	4.02	0.99	2.48	62.88	4.1	64	315	110	78	0.93	0.86		office worker	xxxxxxxxxxx	2020-11-05	Heart center	35	xxxxxx	101		78	7.45	55.7	35.3	5.5	3.1	0.4	4.15	2.63	0.41	0.23	0.03	5.13	160	0.463	90.3	31.2	346
xxxxxxx	21420	xxx	Uygur	man	57	164	73	27.1416	4.9	5.25	1.67	5.59	1.2	3.81	131.06	6.2	91	443			1.49	1.37	6	civil servant	xxxxxxxxxxx	2020-11-06	Heart center	30	xxxxxx	100		70	11.38	67.3	21.9	6.7	3.4	0.7	7.66	2.49	0.76	0.39	0.08	5.47	166	0.488	89.2	30.3	340
xxxxxxx	21388	xxx	Han	man	71	170	87	30.1038	5.54	7.93	0.62	2.97	0.99	1.99	130.1	5.4	56	286	160	90	0.92	0.6	1	retire	xxxxxxxxxxx	2020-11-08	Heart center	16	xxxxxx	100		80	5.67	59.1	33	4.4	3	0.5	3.35	1.87	0.25	0.17	0.03	4.44	143	0.413	93	32.2	346
xxxxxxx	21474	xxx	Han	man	49	173	90	30.0712	5.87	7.37	1.61	2.64	1.08	1.67	189.84	4.6	10.5	283	180	100	1.25	0.57	4	office worker	xxxxxxxxxxx	2020-11-11	Heart center	25	xxxxxx	113	O	76	7.56	60	31	6.6	2.1	0.3	4.54	2.34	0.5	0.16	0.22	5.07	157	0.454	89.5	31	346
xxxxxxx	21646	xxx	Uygur	man	42	170	80	27.6817	16.8	7.99	1.23	4.87	2.26	3.08	302.64	9	62	246.2			1.97	0.85	2		xxxxxxxxxxx	2020-11-18	Heart center	36	xxxxxx	90		82	5.56	46.7	41.4	11.2	0.5	0.2	2.6	2.3	0.62	0.03	0.01	5.43	158	0.5	91.5	29.1	318
xxxxxxx	21064	xxx	Uygur	man	58	178	100	31.5617	4.44	5.28	1.07	2.59	0.74	1.217	148.34	7.4	84	376	132	85	1	0.57	4	cadre	xxxxxxxxxxx	2020-11-18	Heart center	25	xxxxxx	102		84	8.7	59.3	27.9	7.8	4.7	0.3	5.16	2.43	0.68	0.41	0	5.21	170	0.898	95	32.4	341
xxxxxxx	21652	xxx	Han	man	64	163	77	28.9811	5.42	5.47	1	2.68	0.64	1.65	188.76	4.3	77	392			0.69	0.74	5	staff	xxxxxxxxxxx	2020-11-21	Heart center	40	xxxxxx	105	O	72	8.91	68	20.3	10.2	1.2	0.3	6.06	1.81	0.91	0.11	0.03	4.31	122	0.382	88.6	28.3	319
xxxxxxx	21699	xxx	Han	man	53	180	88	27.1605	5.52	4.92	1.53	3.7	0.72	2.79	638.27	6.02	77.34	357.55	130	80	0.78	0.88	5	staff	xxxxxxxxxxx	2020-11-21	Heart center	17	xxxxxx	100		60	5.29	63.3	27.8	6	2.5	0.4	3.35	1.47	0.32	0.13	0.02	4.59	143	0.426	92.8	31.2	336
xxxxxxx	21655	xxx	Han	man	67	178	65	20.5151	4.91	5.28	0.95	2.83	1	2.02	275.4	4.6	111	363.5			0.96	0.79	2	farmer	xxxxxxxxxxx	2020-11-22	Heart center	52	xxxxxx	80	A	72	7.98	62	28.9	6.9	1.4	0.8	4.95	2.31	0.55	0.11	0.06	5.17	161	0.486	94	31.1	331
xxxxxxx	21659	xxx	Han	woman	68	167	65	23.3067	4.51	5.63	1.86	3.34	0.94	1.69	170.78	5.5	60	245			1.21	0.66	1	not in detail	xxxxxxxxxxx	2020-11-22	Heart center	19	xxxxxx	65	A	80	5.42	60.3	30.4	6.3	2.6	0.4	3.27	1.65	0.34	0.14	0.02	4.33	137	0.408	94.2	31.6	336
xxxxxxx	21690	xxx	Han	man	79	160	78	30.4687	10.13	8.43	1.38	4.55	0.7	3.01	223	4.4	63	118			0.73	1.19	0	retire	xxxxxxxxxxx	2020-11-23	Heart center	35	xxxxxx			68	6.86	67.1	24.6	6.3	1.6	0.4	4.6	1.69	0.43	0.11	0.03	4.37	130	0.391	89.5	29.7	332
xxxxxxx	21651	xxx	Han	man	82	173	70	23.3887	4.76	32.37	0.82	3.11	1.46	1.69	182.79	6.9	97	358			1.16	0.65	5	retire	xxxxxxxxxxx	2020-11-24	Heart center	11	xxxxxx	90	A	84	8.35	61.4	27.3	8.6	2.3	0.4	5.13	2.28	0.72	0.19	0.03	5.12	124	0.389	76	24.2	19
xxxxxxx	21656	xxx	Han	man	63	160	59	23.0469	5.83	8.02	2.79	3.91	0.78	2.38	250.1	7.1	74	440			1.06	0.89	3	retire	xxxxxxxxxxx	2020-11-24	Heart center	13	xxxxxx	90	B	76	4.71	54.9	30.8	10	3	1.3	2.59	1.45	0.47	0.14	0.06	4.92	154	0.467	94.9	31.3	330
xxxxxxx	21635	xxx	Han	man	60	170	83	28.7197	4.67	5.46	7.02	4.87	0.75	1.73	294.73	6.6	90	433	180	120	1.3	0.87	6	administrative staff	xxxxxxxxxxx	2020-11-24	Heart center	21	xxxxxx	92		98	7.3	54.7	34.8	7.1	3	0.4	3.99	2.54	0.52	0.22	0.03	5.1	156	0.458	89.8	30.6	341
xxxxxxx	21666	xxx	Han	woman	70	155	70	29.1363	7.81	8.33	0.81	5.8	1.2	4.19	85	4.46	54.99	206.83			1.22	0.83	1	retire	xxxxxxxxxxx	2020-11-25	Heart center	35	xxxxxx	98		79	3.63	49.8	39.4	6.1	4.1	0.6	1.81	1.43	0.22	0.15	0.02	4.33	132	0.394	91	30.5	335
xxxxxxx	21677	xxx	Han	man	54	177	85	27.1314	5.31	5.62	4.57	5.08	1.12	3.11	147.77	6.9	75	375			1.24	1.53	5	teacher	xxxxxxxxxxx	2020-11-25	Heart center	24	xxxxxx			74	6.95	56.6	34.4	4.6	4	0.4	3.93	2.39	0.32	0.28	0.03	4.55	147	0.43	94.5	32.3	342
xxxxxxx	21667	xxx	Han	man	76	169	70	24.5089	5.18	5.61	2.53	4.21	0.65	2.51	113.2	5.8	70	270			0.98	0.91	0	retire	xxxxxxxxxxx	2020-11-25	Heart center	16	xxxxxx	84	A	76	6.44	54	36	7.1	2.6	0.3	3.48	2.32	0.46	0.17	0.02	4.42	140	0.411	93	31.7	341
xxxxxxx	21674	xxx	Han	man	45	175	80	26.1224	8.13	8.59	2.85	3.72	0.92	2.05	309.46	3.5	58	229			1.01	1.07	5	technician	xxxxxxxxxxx	2020-11-25	Heart center	13	xxxxxx	89		76	5.63	63.2	30.4	5	1.2	0.2	3.56	1.71	0.28	0.07	0.01	5.18	1370	0.431	83.2	26.4	318
xxxxxxx	21669	xxx	Han	man	79	169	77	26.9598	5.75	7.61	1.07	2.84	1.02	1.55	166	5.99	88.99	414.75			1.13	0.39	3	retire	xxxxxxxxxxx	2020-11-25	Heart center	1	xxxxxx	90		80	5.29	53.3	35.5	5.9	5.1	0.2	2.82	1.88	1.31	0.27	0.01	4.02	128	0.379	94.3	31.8	338
xxxxxxx	21661	xxx	Han	man	49	167	58	20.7967	4.26	5.31	1.41	3.87	1.16	2.07	428.3	4.3	87	373			1.29	0.71	2		xxxxxxxxxxx	2020-11-25	Heart center	22	xxxxxx	80	B	78	6.21	51.5	39.9	5.2	2.9	0.5	3.2	2.48	0.32	0.18	0.03	4.42	141	0.415	39.9	31.9	340
xxxxxxx	21664	xxx	Han	woman	62	158	68	27.2392	4.25	5.31	1.41	4.46	1	2.91	44	5.35	48.58	316.91			1.09	0.67	2	farmer	xxxxxxxxxxx	2020-11-25	Heart center	8	xxxxxx	85	A	84	3.96	48.3	37.6	4.8	8.8	0.5	1.91	1.49	0.19	0.35	0.02	4.07	120	0.366	89.9	29.5	328
xxxxxxx	21647	xxx	Uygur	man	49	168	65	23.03	7.91	6.84	1.08	3.55	0.97	2.54	280.89	6.61	67.19	368.35			1.05	0.7	2	office worker	xxxxxxxxxxx	2020-11-25	Heart center	14	xxxxxx	78	AB	70	8.12	68.7	25.1	5.4	0.6	0.2	5.58	2.04	0.44	0.05	0.02	4.72	140	0.424	89.8	29.7	330
xxxxxxx	21686	xxx	Han	man	61	169	80	28.0102	6.34	5.33	1.03	2.22	1.11	1.21	105.82	5.9	86	320			1.12	0.45	5	retire	xxxxxxxxxxx	2020-11-26	Heart center	11	xxxxxx	89		72	5.74	75.8	19.3	4.2	0.5	0.2	4.35	1.11	0.24	0.03	0.01	4.75	143	0.418	88	30.1	342
xxxxxxx	21641	xxx	Han	man	41	170	82	28.3737	7.15	7.64	1.57	3.69	1.08	2.55	141.5	4.5	101	401.7	170	90	1.14	0.81	3		xxxxxxxxxxx	2020-11-26	Heart center	49	xxxxxx	91		71	7.41	48.2	43.5	5.4	2.6	0.3	3.57	3.22	0.4	0.19	0.02	4.94	140	0.424	85.8	28.3	330
xxxxxxx	21657	xxx	Han	man	70	180	90	27.7778	5.58	5.48	2.61	3.72	0.95	2.59	169.64	6.1	98	511			1.1	0.8	2	retire	xxxxxxxxxxx	2020-11-26	Heart center	7	xxxxxx			72	4.94	59.3	32	6.3	2.2	0.2	2.93	1.58	0.31	0.11	0.01	4.32	137	0.41	94.9	31.7	334
xxxxxxx	21644	xxx	Han	man	70	175	86	28.0816	5.26	5.32	0.92	3.58	1.27	2.4	241	4.3	99	419.5			1.17	0.74	2	retire	xxxxxxxxxxx	2020-11-26	Heart center	14	xxxxxx	96	A	76	7.48	66.4	19.3	12.6	1.6	0.1	4.97	1.44	0.94	0.12	0.01	4.49	146	0.432	96.2	32.5	338
xxxxxxx	21640	xxx	Uygur	man	64	174	85	28.075	5.49	5.21	1.57	3.05	0.89	2.07	180.44	4.7	101	368			1.05	0.74	6	engineer	xxxxxxxxxxx	2020-11-26	Heart center	47	xxxxxx			92	5.38	54.2	30.9	9.6	5.9	0.4	2.92	1.66	0.46	0.32	0.02	4.97	154	0.442	88.9	31	348
xxxxxxx	21676	xxx	Uygur	man	42	165	60	22.0386	2.92	5	0.99	3.07	1.05	2.04	123	6.5	84	270.2			0.99	0.7	3	farmer	xxxxxxxxxxx	2020-11-26	Heart center	5	xxxxxx	70		60	7.88	82.2	14.7	2.4	0.4	0.3	6.48	1.16	0.19	0.03	0.02	5.14	156	0.467	90.9	30.4	334
xxxxxxx	21739	xxx	Han	woman	44	163	54	20.3244	4.3	5.55	0.72	2.33	1	1.29	130	3	50	286			1.17	0.41	5	teacher	xxxxxxxxxxx	2020-11-27	Heart center	6	xxxxxx	65		68	5.81	68.1	20	7.1	3.8	1	3.96	1.16	0.41	0.22	0.06	4.31	122	0.371	86.1	28.3	329
xxxxxxx	21715	xxx	Uygur	woman	51	170	71	24.5675	5.73	4.94	1.21	4.59	1.5	3.18	117.01	5.79	43.53	246.25	130	85	1.44	0.99	1	farmer	xxxxxxxxxxx	2020-11-28	Heart center	1	xxxxxx	89		82	7.3	57.3	35.6	6.3	0.7	0.1	4.18	2.6	0.46	0.05	0.01	5.33	156	0.455	85.4	29.3	343
xxxxxxx	21725	xxx	Uygur	man	63	168	105	37.2024	5.23	5.51	1.12	3.6	1.33	2.39	145.57	65	96	357.4			1.27	0.87	1	farmer	xxxxxxxxxxx	2020-11-28	Heart center	41	xxxxxx	109		82	9.14	65.6	24	8.3	1.8	0.3	6	2.19	0.76	0.16	0.03	5.23	157	0.463	88.5	30	339
xxxxxxx	21648	xxx	Han	woman	69	158	59	23.634	4.14	5.87	0.59	4.46	1.83	2.99	242.7	3.1	72	168.4	190	160	1.55	0.86	2	farmer	xxxxxxxxxxx	2020-11-28	Heart center	19	xxxxxx	90		73	5.57	63	30.7	5.7	0.4	0.2	3.51	1.71	0.32	0.02	0.01	4.42	135	0.402	91	30.5	336
xxxxxxx	21846	xxx	Han	man	53	178	82	25.8806	16.05	8.05	3.07	3.27	1.6	2.12	136.29	7.2	97	339.8			1.14	0.75	5	cadre	xxxxxxxxxxx	2020-11-28	Heart center	37	xxxxxx	101		76	6.75	54.2	37.5	4.1	4.1	0.1	3.66	2.53	0.28	0.28	0.01	4.3	132	0.373	86.7	30.7	354
xxxxxxx	21696	xxx	Han	man	47	170	78	26.9896	6.6	5.66	3.75	3.35	1.03	2.09	239.88	4.43	48.94	291.03			1.24	0.65	6	cadre	xxxxxxxxxxx	2020-11-29	Heart center	6	xxxxxx	90	O	76	5.7	66	25.9	6.4	0.9	0.8	6.98	2.74	0.68	0.1	0.08	5.07	152	0.474	93.5	30	321
xxxxxxx	21729	xxx	Uygur	woman	45	163	67	25.2174	4.72	5.51	2.72	4.37	0.66	2.93	125.16	4.1	67	288	100	70	0.89	1.42	3	office worker	xxxxxxxxxxx	2020-11-29	Heart center	4	xxxxxx	70		80	7.59	53.2	38.3	5.4	3	0.1	4.04	2.91	6.41	0.23	0.01	4.17	135	0.409	98.1	32.4	330
xxxxxxx	21705	xxx	Han	woman	57	165	75	27.5482	4.77	5.47	1.57	3.93	1.48	2.6	231.9	7.6	114	419.4			1.56	0.89	3	farmer	xxxxxxxxxxx	2020-11-29	Heart center	32	xxxxxx	90		68	7.77	65.2	30.5	3.7	0.5	0.1	5.07	2.37	0.29	0.04	0.01	4.76	131	0.394	90.4	30	332
xxxxxxx	21691	xxx	Han	woman	79	163	72	27.0993	6.98	8.41	1.1	3.17	1.29	1.85	140.28	9.5	91	349			1.19	0.83	1	retire	xxxxxxxxxxx	2020-11-29	Heart center	13	xxxxxx			78	3.98	57.5	33.4	5.3	3.8	0	2.29	1.33	0.21	0.15	0	3.3	97	0.303	91.8	28.4	320
xxxxxxx	21701	xxx	Han	man	52	178	73	23.04	4.57	5.35	1.32	4.12	0.82	3.2	197.4	3.1	65	253	133	75	0.83	1.11	4	office worker	xxxxxxxxxxx	2020-11-30	Heart center	51	xxxxxx	90		80	5.78	51.8	40.8	5.2	1.9	0.3	2.99	2.36	0.3	0.11	0.02	4.22	138	0.4	94.8	32.7	345
xxxxxxx	21727	xxx	Uygur	woman	77	150	55	24.4444	4.25	5.36	2.23	4.31	0.82	3.11	485	4.4	74.36	248.42	98	54	1	0.79	1	retire	xxxxxxxxxxx	2020-11-30	Heart center	18	xxxxxx	70		64	6.33	48.1	42.3	7.1	1.7	0.8	3.04	2.68	0.45	0.11	0.05	4.43	123	0.403	91	27.8	305
xxxxxxx	21728	xxx	Han	woman	81	165	67	24.6097	5.2	5.65	1.69	4.14	1.33	2.84	666.49	5.9	71	358			1.42	0.94	2	retire	xxxxxxxxxxx	2020-11-30	Heart center	21	xxxxxx	75		62	6.46	51.8	38.2	5.9	3.6	0.5	3.35	2.47	0.38	0.23	0.03	3.4	105	0.31	91.2	30.9	339
xxxxxxx	21745	xxx	Han	man	49	180	84	25.9259	6.56	5.64	0.78	2.44	1.24	1.37	113.85	3.3	72	317			1.21	0.56			xxxxxxxxxxx	2020-11-30	Heart center	11	xxxxxx	100		80	5.48	53.6	34.3	9.5	2.4	0.2	2.94	1.88	0.52	0.13	0.01	4.85	153	0.438	90.3	31.5	349
xxxxxxx	21713	xxx	Han	man	48	178	67	21.1463	4.44	5.72	1.07	5.06	1.53	3.15	108	5.81	93.03	379.67	118	79	1.56	0.75	6		xxxxxxxxxxx	2020-11-30	Heart center	27	xxxxxx	80		65	6.03	43.8	45.8	6.3	3.8	0.3	2.64	2.76	0.38	0.23	0.02	4.98	164	0.461	92.6	32.9	356
xxxxxxx	21718	xxx	Han	man	48	178	82	25.8806	6.1	5.49	3.39	4.21	0.99	2.86	408.28	4.92	74.63	381.88			1.17	0.87	2		xxxxxxxxxxx	2020-11-30	Heart center	39	xxxxxx	87		86	7.64	64.6	24.5	6	4.6	0.3	4.94	1.87	0.46	0.35	0.02	5.13	159	0.467	91	31	340
xxxxxxx	21712	xxx	Uygur	man	62	178	97	30.6148	4.42	5.39	1.17	2.69	1.14	1.48	261.04	5	71	324			1.19	0.54	0	retire	xxxxxxxxxxx	2020-11-30	Heart center	33	xxxxxx	105		78	7.16	62.8	25.7	6.8	4.3	0.4	4.5	1.84	0.49	0.31	0.03	5.18	156	0.461	89	30.1	338
xxxxxxx	21706	xxx	Uygur	man	64	175	59	19.2653	4.5	5.31	0.75	4.18	1.51	2.61	296	7.77	106.1	304.48			1.41	0.63	3	not in detail	xxxxxxxxxxx	2020-11-30	Heart center	11	xxxxxx	70		78	4.57	59.4	28.2	9.8	2.2	0.4	2.71	1.29	0.45	0.1	0.02	4.34	133	0.403	92.9	30.6	330
xxxxxxx	21744	xxx	Han	man	52	178	68	21.4619	7.58	6.97	1.09	3.29	0.82	2.27	291.65	7.61	69.9	336.46			0.94	0.68	5	office worker	xxxxxxxxxxx	2020-12-01	Heart center	25	xxxxxx	78		68	6.52	63.2	26.8	7.8	1.4	0.8	4.12	1.75	0.51	0.09	0.05	5.01	152	0.478	95.4	30.3	318
xxxxxxx	21776	xxx	Han	woman	61	155	60	24.974	4.91	5.62	2.62	3.87	0.93	2.58	138.17	5.1	45	259	143	89	1.37	0.84	2	retire	xxxxxxxxxxx	2020-12-01	Heart center	21	xxxxxx	83		81	4.61	48.6	44.3	4.3	2.6	0.2	2.24	2.04	0.2	0.12	0.01	4.15	129	0.37	89.2	31.1	349
xxxxxxx	21872	xxx	Uygur	man	47	175	95	31.0204	7.49	8.9	3.04	2.65	0.68	1.05	89.58	6.7	72	287	143	81	1.37	0.51	3	engineer	xxxxxxxxxxx	2020-12-04	Heart center	25	xxxxxx	101		95	5.78	52.2	36.9	8.5	1.7	0.7	3.02	2.13	0.89	0.1	0.04	4.79	138	0.396	82.7	28.8	348
xxxxxxx	21826	xxx	Han	man	71	169	63	22.0581	5.77	5.96	1.21	5.32	1.17	3.92	172.3	7.8	104	190			1.21	1.25	5	retire	xxxxxxxxxxx	2020-12-07	Heart center	37	xxxxxx	80		78	6.84	59.8	29.4	8.9	1.8	0.1	4.09	2.01	0.61	0.12	0.01	4.45	137	0.414	93	30.8	331
xxxxxxx	21892	xxx	Han	woman	73	155	52	21.6441	4.48	5.6	1.24	5.06	1.36	3.49	133.94	3.2	53	185			1.12	1.14	1	farmer	xxxxxxxxxxx	2020-12-08	Heart center	40	xxxxxx	75		72	5.32	54.4	38.5	4.5	2.4	0.2	2.89	2.05	0.24	0.13	0.01	4.23	137	0.406	96	32.4	337
xxxxxxx	21880	xxx	Han	woman	54	162	88	33.5315	6.57	5.49	3.56	5.05	1.68	2.48	200.98	4.5	58	240			2.23	0.98	3	civil servant	xxxxxxxxxxx	2020-12-08	Heart center	4	xxxxxx	101		78	7.66	62.3	28.7	5.9	2.6	0.5	4.77	2.2	0.45	0.2	0.04	4.61	132	0.451	90	28.6	318
xxxxxxx	21848	xxx	Han	man	40	178	76	23.9869	4.82	5.29	0.74	3.19	1.69	1.8	324.13	5.8	110	332.9	110	70	1.42	0.61	6	soldier	xxxxxxxxxxx	2020-12-08	Heart center	30	xxxxxx	85		70	8.43	47.1	44.2	5	3.3	0.4	2.56	2.4	0.27	0.18	0.02	4.75	149	0.428	90.1	31.4	348
xxxxxxx	21808	xxx	Han	man	54	175	76	24.8163	4.37	5.64	1.27	3.63	1.09	2.44	1.08	7	81	288	110	80	1.08	2.44	5	administrative staff	xxxxxxxxxxx	2020-12-09	Heart center	23	xxxxxx	79	a	78	7.35	55.9	32.4	7.1	4.1	0.5	4.11	2.38	0.52	0.3	0.04	4.37	140	0.415	95	32	337
xxxxxxx	21945	xxx	Uygur	woman	62	162	83	31.6263	6.31	4.56	2.43	3.66	1.1	2.65	104.3	3.31	61.42	228.14			1.38	0.78	2	office worker	xxxxxxxxxxx	2020-12-09	Heart center	7	xxxxxx	105		64	4.05	56.1	34.6	6.4	2.2	0.7	2.27	1.4	0.26	0.09	0.03	4.72	135	0.43	11.1	28.6	314
xxxxxxx	21917	xxx	Uygur	woman	65	165	95	34.8944	11.08	8.87	3.51	3.12	0.86	1.53	65.79	4.6	65	275			1.13	0.56	3	retire	xxxxxxxxxxx	2020-12-09	Heart center	29	xxxxxx	99		91	5.73	59.3	33.2	5.4	1.9	0.2	3.4	1.9	0.31	0.11	0.01	4.61	120	0.369	80	26	325
xxxxxxx	21860	xxx	Han	man	67	172	74	25.0135	5.6	5.85	1.22	2.96	1.25	1.72	353.19	4.6	91	249	130	80	1.13	0.65	2	retire	xxxxxxxxxxx	2020-12-09	Heart center	42	xxxxxx	100		75	7.03	57.8	34	7.5	0.6	0.1	4.06	2.89	0.53	0.04	0.09	4.89	155	0.449	91.8	31.7	345
xxxxxxx	21930	xxx	Han	man	56	171	67	22.913	20.1	8.06	1.69	4.44	1.03	3.23	263.1	4.68	88.83	350.07			1.18	0.94	4		xxxxxxxxxxx	2020-12-09	Heart center	25	xxxxxx	95		77	9.64	72.6	15.8	8.5	2.3	0.8	7	1.52	0.82	0.22	0.08	4.69	143	0.415	88.5	30.5	345
xxxxxxx	21923	xxx	Uygur	man	48	180	84	25.9259	5.4	5.74	3.76	5.51	0.94	3.63	111.28	7.9	78	366			1.15	1.17	4	Professional and technical personnel	xxxxxxxxxxx	2020-12-09	Heart center	15	xxxxxx	100		83	4.66	57.1	30.5	8.2	3.6	0.6	2.66	1.42	0.38	0.17	0.03	5.58	177	0.519	93	31.7	341
xxxxxxx	21920	xxx	Han	man	71	170	52	17.9931	4.13	5.66	0.51	3.68	1.88	2.2	168.99	5.6	69	226			1.23	0.64	4	retire	xxxxxxxxxxx	2020-12-10	Heart center	26	xxxxxx	79		68	5.36	51.5	34.5	7.3	6.3	0.4	2.76	1.85	0.39	0.34	0.02	4.43	136	0.402	90.7	30.7	338
xxxxxxx	21885	xxx	Uygur	woman	47	162	74	28.1969	4.8	5.76	1.06	4.89	1.11	3.58	307.3	2.7	67	358	180	110	0.95	1.27	1	farmer	xxxxxxxxxxx	2020-12-10	Heart center	19	xxxxxx	105		72	4.87	49	45.2	3.3	2.3	0.2	2.39	2.2	0.16	0.11	0.01	4.79	143	0.43	89.8	29.9	333
xxxxxxx	21850	xxx	Han	man	51	167	72	25.8166	8.04	7.97	1.14	3.38	1.08	2.31	98.8	5.9	66	209	150	85	1.03	0.74	5	office worker	xxxxxxxxxxx	2020-12-10	Heart center	10	xxxxxx	90		84	9.36	67.8	2.31	7.8	1.2	0.1	6.35	2.16	0.73	0.11	0.01	4.64	150	0.429	92.5	32.3	350
xxxxxxx	22014	xxx	Han	man	42	180	88	27.1605	5.74	5.39	1.39	4.19	0.92	3.08	421.74	5.7	98	253	125	86	0.97	1.14	6	office worker	xxxxxxxxxxx	2020-12-10	Heart center	38	xxxxxx	102	a	77	5.48	51.8	40.1	5.7	2	0.4	2.84	2.2	0.31	0.11	0.02	4.89	159	0.454	92.8	32.5	350
xxxxxxx	22035	xxx	Han	woman	71	154	47	19.8178	5.09	5.5	0.86	4.46	1.86	2.83	223.95	4.5	41	149			1.52	0.82	1	retire	xxxxxxxxxxx	2020-12-10	Heart center	29	xxxxxx	72	a	76	5.63	53.6	40.1	5.2	0.9	0.2	3.02	2.26	0.29	0.05	0.01	3.24	103	0.307	94.8	31.8	336
xxxxxxx	21886	xxx	Uygur	man	50	170	78	26.9896	4.78	6.87	1.89	4.14	1.27	3.11	175.03	3.2	4.43	1.67			7.4	0.82	2	farmer	xxxxxxxxxxx	2020-12-10	Heart center	8	xxxxxx	105		72	8.82	57.4	28.7	8	4.8	1.1	5.06	2.53	0.71	0.42	0.1	4.87	140	0.434	89.1	28.7	323
xxxxxxx	21947	xxx	Han	woman	58	162	72	27.4348	4.89	5.58	1.22	3.56	1.17	2.52	0.55	3.6	71	326			1.32	0.798	5	office worker	xxxxxxxxxxx	2020-12-12	Heart center	12	xxxxxx	100		62	8.2	50.9	44.6	3.9	0.5	0.1	4.17	3.66	0.32	0.04	0.01	4.89	145	0.43	87.9	29.7	337
xxxxxxx	21902	xxx	Uygur	man	45	165	88	32.3232	5.32	5.17	1.08	3.32	0.52	2.57	3.7	5.5	88	325	120	80	0.54	1.02	5	civil servant	xxxxxxxxxxx	2020-12-13	Heart center	33	xxxxxx	97		70	5.78	58.6	30.8	8.5	1.9	0.2	3.39	1.78	0.49	0.11	0.01	4.67	136	0.396	84.8	29.1	343
xxxxxxx	21921	xxx	Han	man	55	174	74	24.4418	3.27	5.44	2.21	4.73	1.01	3.37	164.17	5	105	329	129	84	1.09	1.21	4	technician	xxxxxxxxxxx	2020-12-13	Heart center	5	xxxxxx	89		84	8.35	59.8	32.7	6	1.3	0.2	4.99	2.73	0.5	0.11	0.02	5.06	167	0.481	95	33	347
xxxxxxx	21946	xxx	Uygur	man	43	167	78	27.968	15.18	9.91	2.01	5.95	1.07	3.99	160	5.11	77.11	362.13			1.11	1.47	3		xxxxxxxxxxx	2020-12-13	Heart center	34	xxxxxx	100		104	8.68	54.2	35.3	5.6	4.1	0.8	4.7	3.06	0.49	0.36	0.07	4.72	136	0.397	84.1	28.8	343
xxxxxxx	21904	xxx	Han	man	54	165	73	26.8136	5.39	5.41	0.95	2.25	0.83	1.46	159.6	5.6	81	283.7	160	110	0.95	0.61	2	driver	xxxxxxxxxxx	2020-12-13	Heart center	12	xxxxxx	100		70	7.61	64.5	24.8	7.6	1.8	0.3	4.91	1.89	0.58	0.21	0.02	4.46	138	6.42	90.1	90.9	343
xxxxxxx	21977	xxx	Han	man	49	172	72	24.3375	4.4	5.57	1.21	3.72	1.17	2.52	83.9	4.4	87	316	140	90	0.97	0.82	3	cadre	xxxxxxxxxxx	2020-12-13	Heart center	36	xxxxxx	84	b	72	5.39	64.3	23.9	9.5	1.9	0.4	3.47	1.29	0.51	0.1	0.02	4.46	143	0.418	93.7	32.1	342
xxxxxxx	21957	xxx	Han	man	58	165	61	22.4059	4.64	4.93	1.7	4.19	0.95	2.97	449.19	7.49	69.9	278.9			1.12	0.9			xxxxxxxxxxx	2020-12-13	Heart center	11	xxxxxx	72		70	7.75	59.1	31.9	6.6	1.5	0.9	4.58	2.47	0.51	0.21	0.07	4.8	152	0.462	96.3	31.7	329
xxxxxxx	21935	xxx	Han	woman	64	155	48	19.9792	6.62	5.61	1.57	4.321	1.22	3.04	186.46	6.8	86	231.5	160	90	1.2	1.02	1	retire	xxxxxxxxxxx	2020-12-14	Heart center	41	xxxxxx	70		74	7.8	67.1	22.9	7.6	1.9	0.5	5.22	1.79	0.59	0.15	0.04	4.42	144	0.441	99.8	32.6	327
xxxxxxx	21933	xxx	Han	woman	56	155	57	23.7253	6.18	5.92	1.09	4.32	2.05	2.46	157.36	3.9	55	234	128	73	1.55	0.79	2	not in detail	xxxxxxxxxxx	2020-12-14	Heart center	36	xxxxxx	79		90	4.1	51.6	41	5.4	1.5	0.5	2.12	1.68	0.22	0.06	0.02	3.77	119	0.357	94.7	31.6	333
xxxxxxx	21986	xxx	Han	woman	54	153	72	30.7574	4.98	5.62	1.58	5.17	1.44	3.81	480.95	4.9	60	265			1.29	1.12	1	not in detail	xxxxxxxxxxx	2020-12-14	Heart center	11	xxxxxx	91	a	72	7.93	48.4	42	6.6	2.6	0.4	3.84	3.33	0.52	0.21	0.03	4.78	147	0.447	93.5	30.8	329
xxxxxxx	21949	xxx	Uygur	man	58	172	80	27.0416	5.18	5.73	3.17	4.29	0.77	2.89	711.95	6.1	66	303			1.47	0.97	4	cadre	xxxxxxxxxxx	2020-12-15	Heart center	24	xxxxxx	86			6.03	64.9	26.5	5.1	3.3	0.2	3.91	1.6	0.31	0.2	0.01	4.75	150	0.443	91.2	31.6	346
xxxxxxx	21979	xxx	Han	man	80	165	70	25.7117	4.69	7.99	0.7	2.69	1.07	1.7	121.93	5.8	65	3.6			1.02	0.57	0	retire	xxxxxxxxxxx	2020-12-15	Heart center	35	xxxxxx	82		79	7.62	70.6	22.9	4.3	2.1	0.1	5.13	1.66	0.31	0.15	0.01	4.86	161	0.448	92.2	33.1	359
xxxxxxx	21960	xxx	Han	woman	67	150	65	28.8889	4.76	5.56	0.91	4.86	1.38	3.37	185.76	5.1	71	250			1.75	0.91	1	retire	xxxxxxxxxxx	2020-12-15	Heart center	22	xxxxxx	70		68	5.16	63.5	24	7.8	4.3	0.2	3.28	1.25	0.4	0.22	0.01	4.54	140	0.418	92.1	30.8	335
xxxxxxx	21987	xxx	Han	woman	74	150	45	20	5.42	4.7	0.68	4.81	1.93	2.46	88.48	7.27	45.66	204	120	75	1.64	0.77	3	office worker	xxxxxxxxxxx	2020-12-15	Heart center	35	xxxxxx	70		65	5.01	62.9	28.7	7	0.8	0.6	3.15	1.44	0.35	0.04	0.03	4.08	125	0.396	97.1	30.6	316
xxxxxxx	21958	xxx	Han	man	62	174	87	28.7356	4.37	4.9	4.52	4.56	0.93	3.62	399.25	6.69	78.45	363.05	123	68	1.12	1.08	5		xxxxxxxxxxx	2020-12-15	Heart center	1	xxxxxx	88		68	7.35	56	32.2	9.5	1.5	0.8	4.12	2.37	0.7	0.11	0.06	5.16	157	0.476	0.47	92.1	30
xxxxxxx	22076	xxx	Han	man	64	162	53	20.1951	6.06	8.57	1.89	4.38	0.99	3.05	153.35	12.3	108	356			1.07	0.96	3	retire	xxxxxxxxxxx	2020-12-16	Heart center	25	xxxxxx	75		97	9.39	49.8	37.1	7.7	5.2	0.2	4.68	3.48	0.72	0.49	0.02	4.98	138	0.405	91.6	31.2	341
xxxxxxx	21981	xxx	Han	woman	59	154	47	19.8178	5.06	8.39	0.6	6.51	1.81	4.74	138.01	3.3	58	163	120	70	1.36	7.31	3	retire	xxxxxxxxxxx	2020-12-16	Heart center	16	xxxxxx	71	b	96	5.33	59.8	34	4.7	1.1	0.4	3.19	1.81	0.25	0.06	0.02	4.29	131	0.389	90.7	30.5	337
xxxxxxx	22053	xxx	Han	woman	76	159	72	28.4799	24.66	8.02	0.55	4.47	1.79	3.05	19.37	25.2	11.76	2.65			1.23	0.78	3	retire	xxxxxxxxxxx	2020-12-16	Heart center	17	xxxxxx	81		87	12.04	65.2	23.8	9.1	1.1	0.8	7.85	2.87	1.1	0.13	0.1	4.24	132	0.412	97.2	31.1	320
xxxxxxx	22053	xxx	Han	woman	76	159	72	28.4799	24.66	8.02	0.55	4.47	1.79	3.05	19.37	25.2	11.76	2.65			1.23	0.78	3	retire	xxxxxxxxxxx	2020-12-16	Heart center	17	xxxxxx	81		87	12.04	65.2	23.8	9.1	1.1	0.8	7.85	2.87	1.1	0.13	0.1	4.24	132	0.412	97.2	31.1	320
xxxxxxx	22059	xxx	Han	man	69	169	81	28.3604	5.32	5.28	1.24	3.63	1.03	2.49	189.98	5	84	324			1.08	0.94	1	farmer	xxxxxxxxxxx	2020-12-16	Heart center	51	xxxxxx	100		70	4.8	55.4	31.6	8.9	3.6	0.5	2.66	1.52	0.43	0.17	0.02	4.86	145	0.454	93.5	29.9	320
xxxxxxx	21980	xxx	Uygur	man	55	176	87	28.0863	4.23	5.41	0.91	3.29	0.85	2.28	366.54	4.8	70	344	101	67	0.85	0.72	6	policeman	xxxxxxxxxxx	2020-12-16	Heart center	12	xxxxxx	92		78	7.63	54.2	38.7	5.5	1.3	0.3	4.14	2.95	0.42	0.1	0.02	5.04	144	0.434	86.1	28.6	332
xxxxxxx	22021	xxx	Han	man	70	170	74	25.6055	4.03	5.44	1.71	5.53	0.9	4.4	862.24	2.7	70	433			1.01	1.36	1	farmer	xxxxxxxxxxx	2020-12-18	Heart center	22	xxxxxx	87	b	84	6.39	61.2	28.8	8	0.9	1.1	3.91	1.84	0.51	0.06	0.07	4.02	130	0.396	98.5	32.3	328
xxxxxxx	22083	xxx	Han	man	74	180	90	27.7778	5.89	7.43	0.79	2.96	0.94	2.09	257.57	4.72	108.12	281.24	180	105	1.03	0.54	2	retire	xxxxxxxxxxx	2020-12-19	Heart center	1	xxxxxx	100		78	3.52	53.6	31	11.4	3.4	0.6	1.89	1.09	0.4	0.12	0.02	5.41	119	0.38	70.2	22	313
xxxxxxx	22036	xxx	Han	man	47	169	62	21.7079	4.01	5.5	0.9	3.42	0.86	2.4	145.43	5.1	82	261	122	69	0.9	0.83	3	retire	xxxxxxxxxxx	2020-12-19	Heart center	26	xxxxxx	78	a	99	8.64	57.9	30	9.4	2.5	0.2	5	2.59	0.81	0.22	0.02	4.95	170	0.493	99.6	34.3	345
xxxxxxx	22040	xxx	Han	woman	62	165	59	21.6713	5.15	6.21	2.69	3.8	1.37	2.08	105.13	5.6	73	333	190	100	1.33	0.68	5	retire	xxxxxxxxxxx	2020-12-20	Heart center	30	xxxxxx	86	b	80	6.11	40.7	45.3	9.5	3.8	0.7	2.49	2.77	0.58	0.23	0.04	4.93	148	0.429	87	30	345
xxxxxxx	22088	xxx	Han	man	55	162	64	24.3865	5.07	5.51	1.81	3.48	0.84	2.25	101.35	3.8	80	371			0.96	0.79	4	driver	xxxxxxxxxxx	2020-12-20	Heart center	13	xxxxxx			76	6.38	61.6	26.6	8.1	2.4	1.3	5.16	2.23	0.68	0.2	0.11	4.66	142	0.427	91.6	30.5	333
xxxxxxx	22069	xxx	Han	man	61	170	80	27.6817	5.72	5.13	3.36	4.21	0.95	2.94	225.21	4.22	59.76	308.86	148	83	1.13	0.85		farmer	xxxxxxxxxxx	2020-12-20	Heart center	10	xxxxxx	85		76	5.66	43.7	36	16.4	2.8	1.1	2.47	2.04	0.93	0.16	0.06	5.25	164	0.487	92.8	31.2	337
xxxxxxx	22013	xxx	Han	woman	69	150	65	28.8889	4.9	5.77	2.75	5.19	1.43	3.04	85.75	7.6	65	331	180	90	1.84	1.08	1		xxxxxxxxxxx	2020-12-20	Heart center	22	xxxxxx	88	b	66	9.69	55.4	34.1	4.5	5.4	0.6	5.37	3.3	0.44	0.52	0.06	4.85	150	0.444	91.5	30.9	338
xxxxxxx	22026	xxx	Han	woman	50	160	56	21.875	4.18	5.66	0.67	4.21	2.23	2.37	43.63	4.1	68	256	120	80	1.68	0.69	6	civil servant	xxxxxxxxxxx	2020-12-20	Heart center	16	xxxxxx	76	b	68	4.37	58.1	33.6	6.4	1.4	0.5	2.54	1.47	0.28	0.06	0.02	3.96	101	0.316	79.8	25.5	320
xxxxxxx	22020	xxx	Han	man	57	170	81	28.0277	4.45	5.35	2.32	4.93	1.02	3.49	125.75	6.1	79	299			1.14	1.31	1	farmer	xxxxxxxxxxx	2020-12-20	Heart center	8	xxxxxx	89	a	72	16.4	83.7	12.1	4.2	0	0	13.73	1.98	0.69	0	0	5.19	159	0.461	88.8	30.6	345
xxxxxxx	22037	xxx	Han	man	58	171	76	25.9909	4.98	5.541	1.17	3.49	1.35	2.31	155.19	4.1	107	310.5	150	90	1.3	0.82		office worker	xxxxxxxxxxx	2020-12-20	Heart center	2	xxxxxx	92		68	5.32	60.8	34.8	36	0.6	0.2	3.23	1.85	0.19	0.03	0.01	4.57	150	0.422	98.3	32.8	355
xxxxxxx	22022	xxx	Han	woman	72	152	56	24.2382	6.48	7.15	2.62	3.97	1.12	2.75	255	4.66	29.33	363.79			1.42	0.78	3	retire	xxxxxxxxxxx	2020-12-21	Heart center	8	xxxxxx	94	b	82	11.29	67.5	25.6	4.8	1.9	0.2	7.62	2.89	0.54	0.21	0.02	4.29	130	0.377	87.9	30.3	345
xxxxxxx	22038	xxx	Han	woman	69	162	65	24.7676	6.26	5.54	1.57	4.36	1.37	2.75	145.91	3.7	60	3.1			1.37	0.83	2	retire	xxxxxxxxxxx	2020-12-21	Heart center	28	xxxxxx	90		60	5.34	65.5	27	5.8	1.7	0	3.5	1.44	0.31	0.09	0	4.02	120	0.363	90.3	29.9	331
xxxxxxx	22034	xxx	Uygur	woman	59	150	70	31.1111	4.29	4.58		4.75	1.55	2.98	338.57	4.12	64.77	249.51			1.2	1	3	farmer	xxxxxxxxxxx	2020-12-21	Heart center	33	xxxxxx	98	b	74	10.74	74.8	17.4	7.4	0.1	0.3	8.03	1.87	0.79	0.01	0.03	3.53	100	0.311	88.1	28.3	322
xxxxxxx	22030	xxx	Han	woman	71	159	58	22.9421	4.55	5.77	1.19	3.03	1.02	1.82	859.45	4.4	63	314	160	90	1.05	0.59	4	retire	xxxxxxxxxxx	2020-12-21	Heart center	13	xxxxxx	82	b	70	9.7	72.3	20.2	7.1	0.3	0.1	7.01	1.96	0.69	0.03	0.01	4.1	129	0.4	97.3	31.4	322
xxxxxxx	22024	xxx	Han	man	56	175	80	26.1224	5.75	5.77	4.18	6.31	1.3	4.11	122.72	7.3	78	348			1.46	1.26	5	Professional and technical personnel	xxxxxxxxxxx	2020-12-21	Heart center	25	xxxxxx	90		70	6.07	57.3	34.9	4.8	2.8	0.2	3.48	2.12	0.29	0.17	0.01	4.12	133	0.391	94.9	32.3	340
xxxxxxx	22018	xxx	Han	man	47	170	73	25.2595	8.5	8.62	2.54	4.28	1.03	2.58	191.03	4.7	66	427			1.2	0.91	2		xxxxxxxxxxx	2020-12-21	Heart center	50	xxxxxx	80	b	72	6.7	90.3	8.5	0.7	0.1	0.4	6.05	0.57	0.05	0.01	0.03	4.98	155	0.466	93.6	31.1	333
xxxxxxx	22015	xxx	Han	man	72	168	72	25.5102	3.87	5.79	0.54	3.27	1.08	2.15	114.94	5	84	344			0.92	0.75	3	retire	xxxxxxxxxxx	2020-12-21	Heart center	44	xxxxxx	83	b	81	6.4	67.1	17.5	10.3	4.4	0.7	4.29	1.12	0.66	0.28	0.04	3.84	121	0.374	97.5	31.6	324
xxxxxxx	22067	xxx	Han	man	61	164	64	23.7954	4.86	5.78	1.11	4.32	1.51	3.04	156.62	5.9	76	369			1.49	0.98	3	staff	xxxxxxxxxxx	2020-12-22	Heart center	10	xxxxxx	90		70	6.11	59.5	30	6.7	3.6	0.2	3.64	1.83	0.41	0.22	0.01	5.24	160	0.454	86.6	30.5	352
xxxxxxx	22027	xxx	Han	man	50	180	96	29.6296	6.73	5.34	5.75	4.29	1.07	1.56	227.39	3.92	70.54	510.51			1.28	0.87	3	office worker	xxxxxxxxxxx	2020-12-22	Heart center	41	xxxxxx	107	b	64	5.65	55.6	34.7	5.7	2.8	1.2	3.4	1.96	0.32	0.16	0.07	4.71	150	0.44	93.4	31.8	341
xxxxxxx	22072	xxx	Han	man	49	178	78	24.6181	4.58	5.55	1.64	3.02	1.1	2.02	157.08	6.6	118	339	125	74	1.15	0.74	3		xxxxxxxxxxx	2020-12-22	Heart center	36	xxxxxx	81		74	7.3	54.8	33.7	7.7	3.3	0.5	4	2.46	0.56	0.24	0.04	4.82	153	0.436	90.5	31.7	351
xxxxxxx	22080	xxx	Uygur	man	47	167	70	25.0995	4.19	5.46	0.78	2.74	1.2	1.75	157.95	5.8	89	291.6			1.23	0.62		teacher	xxxxxxxxxxx	2020-12-22	Heart center	39	xxxxxx	105		68	10.57	66.6	20.6	9.3	3.3	0.2	7.04	2.18	0.98	0.35	0.02	4.16	142	0.426	102.7	34.2	333
xxxxxxx	22126	xxx	Han	woman	82	160	44	17.1875	5.29	5.47	1.02	3.52	1.57	2.03	812.56	4.9	42	192	110	60	1.3	0.65	2	farmer	xxxxxxxxxxx	2020-12-23	Heart center	27	xxxxxx	65	0	83	9.81	73.3	14	11.9	0.3	0.5	7.19	1.37	1.17	0.03	0.05	3.06	93	0.275	89.9	30.4	338
xxxxxxx	22100	xxx	Uygur	man	38	165	60	22.0386	4.66	5.23	0.93	3.81	1.02	2.66	161.33	6.3	56	281	101	60	1.05	0.79	1	farmer	xxxxxxxxxxx	2020-12-23	Heart center	41	xxxxxx	75		76	8.54	59	31.9	6.8	1.9	0.4	5.04	2.72	0.58	0.16	0.03	4.83	135	0.418	86.5	28	323
xxxxxxx	22113	xxx	Uygur	man	58	176	94	30.3461	5.29	5.76	1.56	5.07	1.112	3.6	42.64	6	82	409			1.24	1.17	6	teacher	xxxxxxxxxxx	2020-12-23	Heart center	25	xxxxxx	102		73	6.33	53.5	37.9	7	1.4	0.2	3.39	7.4	0.44	0.09	0.01	4.61	147	0.441	95.7	31.9	333
xxxxxxx	22084	xxx	Han	woman	56	159	63	24.9199	5.21	5.36	2.94	3.55	1.11	1.93	422.06	3.7	75	322	124	76	1.3	0.7	5	technician	xxxxxxxxxxx	2020-12-23	Heart center	45	xxxxxx	79		82	6	56.7	34.8	5	3.2	0.3	3.4	2.09	0.3	0.19	0.02	4.04	122	0.362	89.6	30.2	337
xxxxxxx	22087	xxx	Han	man	78	172	54	18.2531	4.93	5.79	0.61	2.81	1.67	1.32	571.1	4.2	49	179	180	110	1.38	0.45	2		xxxxxxxxxxx	2020-12-23	Heart center	42	xxxxxx	95		80	4.63	70.2	21.2	6.7	1.7	0.2	3.25	0.98	0.31	0.08	0.01	3.97	123	0.375	94.5	31	328
xxxxxxx	22060	xxx	Han	woman	46	166	67	24.3141	4.73	5.6	0.9	2.86	1.12	1.71	138.01	2.3	61	198			1.06	0.54	1		xxxxxxxxxxx	2020-12-23	Heart center	49	xxxxxx	90		70	3.6	41.8	48.9	6.9	1.9	0.5	1.5	1.76	0.25	0.07	0.02	4.26	128	0.391	91.7	30	327
xxxxxxx	22071	xxx	Han	man	58	165	70	25.7117	4.97	5.43	1.49	5.24	1	4	752.89	6.7	66	397	148	84	1.02	1.18	3		xxxxxxxxxxx	2020-12-23	Heart center	32	xxxxxx	91		80	5.37	45.1	44.3	6.1	4.3	0.2	2.42	2.38	0.33	0.23	0.01	4.7	148	0.432	91.9	31.5	343
xxxxxxx	22128	xxx	Han	man	75	165	68	24.977	9.74	6.68	0.59	2.33	0.67	1.58	271.05	4.9	76.7	241.5			0.63	0.36	1	retire	xxxxxxxxxxx	2020-12-23	Heart center	46	xxxxxx	79		84	8.83	73.8	15.4	9.2	0.7	0.9	6.52	1.36	0.81	0.06	0.08	4.51	127	0.431	91.6	28.2	308
xxxxxxx	22094	xxx	Han	woman	70	165	55	20.202	4.15	5.46	0.91	3.01	1.31	1.87	148.86	5.8	87	298			1.2	0.66		retire	xxxxxxxxxxx	2020-12-24	Heart center	23	xxxxxx	85		80	5.05	45.7	44	7.1	3	0.2	2.31	2.22	0.36	0.15	0.01	4.06	121	0.372	91.6	29.6	325
xxxxxxx	22054	xxx	Uygur	man	69	168	90	31.8878	6.68	6.03	1.58	3.52	0.72	2.48	111	5.7	88	352	220	110	0.82	0.92	3	office worker	xxxxxxxxxxx	2020-12-24	Heart center	26	xxxxxx	105		72	4.54	59.5	32.8	5.7	1.8	0.2	2.7	1.49	0.26	0.08	0.01	4.24	127	0.395	93.2	30	322
xxxxxxx	22057	xxx	Han	man	62	170	76	26.2976	3.43	5.88	0.81	2.33	1.12	1.26	146.16	4	74	275			1.13	0.46	2		xxxxxxxxxxx	2020-12-24	Heart center	13	xxxxxx	81		76	6.41	58.5	32.4	7.3	1.6	0.2	3.75	2.08	0.47	0.1	0.01	4.57	143	0.423	92.6	31.3	338
xxxxxxx	22085	xxx	Han	woman	76	160	48	18.75	17.64	8.41	0.96	3.45	1.11	1.83	107.34	5.08	39.26	196.71	160	90	1.26	0.7			xxxxxxxxxxx	2020-12-24	Heart center	37	xxxxxx	85		63	4.11	52	40.6	5.4	1	1	2.14	1.67	0.22	0.04	0.04	4.81	123	0.401	83.4	25.6	307
xxxxxxx	22082	xxx	Han	woman	49	170	71	24.5675	5.04	5.62	1.35	4.16	1.05	2.9	178.46	4.7	68	245			1.14	0.93	3	retire	xxxxxxxxxxx	2020-12-24	Heart center	40	xxxxxx	85		64	5.22	44.1	41.4	5.6	8	1.1	2.3	2.16	0.28	0.42	0.06	4.56	139	0.413	90.6	30.5	337
xxxxxxx	22064	xxx	Han	woman	53	169	75	26.2596	4.42	5.92	1.76	5.29	1.12	4.02	643.78	3.3	54	269			1.15	1.28	4	office worker	xxxxxxxxxxx	2020-12-24	Heart center	29	xxxxxx	91		68	4.86	46.3	46.3	4.5	2.5	0.8	2.25	2.25	0.22	0.1	0.04	4.43	132	0.389	87.8	29.8	339
xxxxxxx	22098	xxx	Han	woman	61	158	59	23.634	11.39	7.81	3.39	5	1.14	3.47	227.25	5.98	43.53	263.17	146	91	1.41	0.9	0	retire	xxxxxxxxxxx	2020-12-24	Heart center	14	xxxxxx	70		69	8.53	36.7	35.3	5.7	1.5	0.8	4.84	3.01	0.49	0.13	0.07	4.48	128	0.39	87.1	28.6	328
xxxxxxx	22061	xxx	Han	man	48	178	110	34.7178	3.99	5.37	1.37	3.23	1.38	1.8	115.83	4.5	78	474	210	160	1.4	0.57		office worker	xxxxxxxxxxx	2020-12-24	Heart center	28	xxxxxx	100		72	6.74	54.9	37.3	5.1	2.5	0.2	4.8	3.26	0.45	0.22	0.02	5.2	170	0.472	90.8	32.7	360
xxxxxxx	22056	xxx	Han	man	66	172	76	25.6896	5.67	5.57	1.27	3.29	1.33	1.92	131.61	5.4	118	389	111	67	1.51	0.65	2	retire	xxxxxxxxxxx	2020-12-24	Heart center	4	xxxxxx	85		68	7.45	53.2	39.1	4.7	2.7	0.3	3.96	2.91	0.35	0.2	0.02	4.56	143	0.435	95.4	31.4	329
xxxxxxx	22086	xxx	Han	man	52	173	75	25.0593	4.59	5.67	1.5	3.56	1.27	2.14	31.63	5.8	75	313			1.29	0.73	7	office worker	xxxxxxxxxxx	2020-12-24	Heart center	39	xxxxxx	95		80	4.89	59.4	32.7	5.9	1.6	0.4	2.9	1.6	0.4	0.08	0.02	5.01	151	0.44	87.8	30.1	343
xxxxxxx	22097	xxx	Uygur	woman	61	165	58	21.3039	8.57	8.88	1.76	5.24	1.17	3.89	180.3	5.7	48	164	147	90	1.1	1.26	1	farmer	xxxxxxxxxxx	2020-12-25	Heart center	26	xxxxxx	70		72	5	67.2	27.8	3.6	1	0.4	3.36	1.39	0.18	0.05	0.02	5.23	145	0.447	85.5	27.7	324
xxxxxxx	22109	xxx	Uygur	man	46	170	85	29.4118	11.58	7.95	1.19	3.85	0.98	2.44	143.5	5.58	88.01	251.5			1.02	0.86	6	civil servant	xxxxxxxxxxx	2020-12-25	Heart center	6	xxxxxx	91		93	5.68	74	16.9	8.3	0.4	0.4	4.77	0.95	0.47	0.02	0.02	3.91	127	0.373	95.4	30.9	324
xxxxxxx	22114	xxx	Uygur	man	70	176	93	30.0232	5.2	7.89	1.06	2.95	1.07	1.69	891.82	7.3	100	398			1.02	0.63	4	retire	xxxxxxxxxxx	2020-12-25	Heart center	45	xxxxxx	97		76	7.19	52.5	34.9	5.1	7.1	0.4	3.77	2.51	0.37	0.51	0.03	4.26	130	0.379	89	30.5	343
xxxxxxx	22123	xxx	Han	man	48	175	80	26.1224	7.48	7.27	2.65	4.87	0.8	3.39	662.26	6.85	68.49	282.65			0.97	1	4	worker	xxxxxxxxxxx	2020-12-26	Heart center	44	xxxxxx	91		82	9.06	67.6	23.4	6.1	2.1	0.8	6.12	2.12	0.55	0.19	0.07	5.32	158	0.486	91.4	29.7	325
xxxxxxx	22124	xxx	Han	woman	74	155	60	24.974	9.21	7.48	1.92	5.37	1.2	3.75	434.51	4.07	34.2	203.99			1.35	1.02	3	retire	xxxxxxxxxxx	2020-12-26	Heart center	17	xxxxxx	78		78	10.02	78.3	16.8	4.5	0	0.4	7.85	1.68	0.45	0	0.04	4.94	143	0.43	87	28.9	333
xxxxxxx	22104	xxx	Han	man	52	174	76	25.1024	4.53	5.23	0.93	3.81	1.02	2.66	161.32	6.5	74	291	168	105	1.05	0.78	1	farmer	xxxxxxxxxxx	2020-12-26	Heart center	22	xxxxxx	90		68	5.64	57	3.21	6.3	1.9	0.4	5.04	2.72	0.58	0.16	0.03	4.84	135	0.417	86.5	28	323
xxxxxxx	22108	xxx	Uygur	man	47	172	95	32.112	6.28	4.48	0.82	2.82	0.02	1.82	50.54	3.7	59.23	252.5	138	68	0.69	0.78	5	teacher	xxxxxxxxxxx	2020-12-26	Heart center	6	xxxxxx	87		89	7.75	63.4	23.5	12.1	0.5	0.5	4.9	1.82	0.94	0.04	0.04	4.69	143	0.406	86.6	30.5	352
xxxxxxx	22134	xxx	Han	man	81	170	74	25.6055	4.6	5.67	0.6	3.3	1.05	2.37	233.82	4	83	295.4	140	68	0.91	0.84	2	retire	xxxxxxxxxxx	2020-12-27	Heart center	29	xxxxxx	75		80	5.64	58.3	30.1	7.4	3.7	0.5	3.29	1.7	0.42	0.21	0.03	3.84	130	0.377	98.2	33.9	345
xxxxxxx	22135	xxx	Han	woman	74	160	74	28.9062	5.61	8.2	1.13	3.91	1.01	3	191.03	5.3	81	321			1.04	0.96	1	retire	xxxxxxxxxxx	2020-12-27	Heart center	16	xxxxxx	81		71	4.8	57	33.5	5.8	3.3	0.4	2.74	1.61	0.28	0.16	0.02	4.39	130	0.401	91.3	29.6	324
xxxxxxx	22121	xxx	Han	woman	49	161	60	23.1473	4.6	5.84	0.71	3.4	1.41	2.33	268.81	5	68	218	140	110	1.23	0.71		teacher	xxxxxxxxxxx	2020-12-27	Heart center	29	xxxxxx	90		67	5.6	53.5	40.5	5.1	0.5	0.4	3	2.27	0.29	0.03	0.02	3.71	118	0.344	92.5	31.6	342
xxxxxxx	22117	xxx	Han	man	41	174	78	25.763	4.81	5.81	0.55	4.27	1.75	2.85	109.3	4.6	88	366			1.21	0.75	3		xxxxxxxxxxx	2020-12-27	Heart center	11	xxxxxx	90		60	5.04	5.18	37.8	7.3	2.5	0.4	2.61	1.9	0.35	0.15	0.01	5.1	152	0.447	88.5	20.1	340
xxxxxxx	22138	xxx	Han	man	52	183	89	26.5759	4.05	5.69	1.56	2.95	1.16	2.04	243.82	4.4	80	294.9	110	70	1.16	0.73	5	office worker	xxxxxxxxxxx	2020-12-27	Heart center	38	xxxxxx	91		80	7.15	55.4	37.8	5	1.5	0.4	3.96	2.7	0.36	0.1	0.03	5.13	154	0.444	86.5	30	347
xxxxxxx	22118	xxx	Han	man	49	168	71	25.1559	5.58	6.05	2.27	4.2	1.33	2.98	520.34	4	84	264.6	106	84	1.26	1.05	3		xxxxxxxxxxx	2020-12-27	Heart center	3	xxxxxx	89		82	7.09	53.3	36.1	6.8	3.4	0.4	3.78	2.56	0.46	0.24	0.03	5.06	157	0.475	93.9	31	331
xxxxxxx	22112	xxx	Han	man	68	166	78	28.306	7.14	8.35	1.05	5.36	1.36	4.15	184.41	4.1	84	341.9	125	85	1.23	1.25	1	farmer	xxxxxxxxxxx	2020-12-27	Heart center	49	xxxxxx	85		78	5.55	39	50.5	8.1	2.2	0.2	2.16	2.8	0.45	0.12	0.01	4.64	151	0.45	97	32.5	336
xxxxxxx	22103	xxx	Han	man	79	170	50	17.301	5.18	4.53	1.57	3.27	0.64	1.95	185.25	7.47	93.29	438	82	52	0.88	0.69	3	retire	xxxxxxxxxxx	2020-12-28	Heart center	26	xxxxxx	65		82	4.45	54.2	29.2	13.9	1.6	1.1	2.41	1.3	0.62	0.07	0.05	4.49	132	0.404	90	29.4	327
xxxxxxx	22127	xxx	Han	woman	55	161	80	30.863	6.04	8.54	3.07	4.78	1.19	2.95	139.32	4.3	68	271	180	100	1.36	1.05	1	farmer	xxxxxxxxxxx	2020-12-29	Heart center	13	xxxxxx	95		85	5.04	51.7	39.7	5.4	3	0.2	2.11	2	0.27	0.15	0.01	4.54	140	0.413	0.91	30.8	339
xxxxxxx	27632	xxx	Uygur	woman	52	160	65	25.3906	4.66	5.33	1	5.99	1.34	4.19	750	3.4	59	253	101	60	1.41	1.19	6	nurse	xxxxxxxxxxx	2021-01-01	Heart center	25	xxxxxx		o	70	6.24	55.4	35.6	4.6	3.4	1	3.46	2.22	0.29	0.21	0.06	4.54	136	0.426	93.8	30	39
xxxxxxx	27578	xxx	Han	man	34	172	81	27.3797	4.26	5.11	3.49	3.91	0.78	2.95	211.83	3.3	95	361.8	111	78	0.15	0.8	5	office worker	xxxxxxxxxxx	2021-01-02	Heart center	34	xxxxxx	94		78	7.3	59.2	28.9	10.4	1	0.5	4.32	2.11	0.76	0.07	0.04	5.35	164	0.5	93.8	30.7	327
xxxxxxx	27576	xxx	Han	man	49	180	82	25.3086	3.76	5.66	1.86	6.85	0.89	5.19	155.58	4.6	83	447	115	85	1.14	1.54	6		xxxxxxxxxxx	2021-01-02	Heart center	17	xxxxxx	81		84	8.91	48.1	42.4	7.6	1.8	0.1	4.29	3.78	0.68	0.16	0.01	5.78	187	0.548	94.8	32.4	341
xxxxxxx	25869	xxx	Han	man	51	185	86	25.1278	3.41	5.12	3.67	4.98	0.85	4.01	186.9	5.9	68	288.8			1.02	1.1		driver	xxxxxxxxxxx	2021-01-03	Heart center	36	xxxxxx	91	AB	60	6.1	57	33.2	6.9	2.5	0.4	3.48	2.03	0.42	0.15	0.02	4.87	152	0.451	92.7	31.2	337
xxxxxxx	27669	xxx	Han	woman	55	160	61	23.8281	5.06	6.37	0.62	4.38	0.97	2.82	15	3.67	48.1	246	119	92	1.36	0.91	2		xxxxxxxxxxx	2021-01-04	Heart center	14	xxxxxx			81	3.9	55.9	33.6	9.7	0.5	0.3	2.18	1.31	0.38	0.02	0.01	4.02	124	0.39	96	30.8	321
xxxxxxx	27653	xxx	Han	woman	57	170	67	23.1834	3.87	7.8	1.44	2.4	0.78	1.08	173.61	5.5	47	270			1.04	0.4			xxxxxxxxxxx	2021-01-05	Heart center	23	xxxxxx	70		84	5.04	54.4	33.7	6.9	5	0	2.74	1.7	0.35	0.25	0	3.69	107	0.329	89.2	29	325
xxxxxxx	27675	xxx	Han	woman	59	170	65	22.4913	7.18	28.97	3.17	3.76	0.9	2.64	466.08	4.96	58.4	335	138	74	0.93	0.83	3	retire	xxxxxxxxxxx	2021-01-06	Heart center	42	xxxxxx	99	-	82	5.15	63	30.5	4.7	1.6	0.2	3.24	1.57	0.24	0.08	0.01	4.5	137	0.42	94	30.4	324
xxxxxxx	22262	xxx	Han	man	44	173	80	26.7299	7.12	8.23	1.204	9.93	0.96	4.85	125	2.77	61.44	290.7	140	100	1.06	0.05	6	civil servant	xxxxxxxxxxx	2021-01-06	Heart center	47	xxxxxx	102		80	17.85	88.9	6.4	4.3	0.1	0.3	15.87	1.14	0.77	0.02	0.05	4.75	149	0.435	91.6	31.4	343
xxxxxxx	27636	xxx	Han	man	64	160	73	28.5156	5.01	5.22	1.04	4.37	1.32	2.71		4.3	43	259			1.37	0.82	1	farmer	xxxxxxxxxxx	2021-01-06	Heart center	31	xxxxxx			67	3.89	47.6	41.1	8	2.8	0.5	1.85	1.6	0.31	0.11	0.02	4.22	125	0.386	91.5	29.6	324
xxxxxxx	22277	xxx	Han	woman	75	153	58	24.7768	6.3	5.33	1.38	4.65	1.28	3.53	3.534	7.3	84	354	131	73	1.17	1.3	5	retire	xxxxxxxxxxx	2021-01-07	Heart center	26	xxxxxx	78		62	6.38	64.8	27.4	4.5	3	0.3	4.13	1.75	0.29	0.19	0.02	3.93	121	0.374	95.2	30.8	324
xxxxxxx	22276	xxx	Han	woman	55	168	65	23.03	5.02	7.62	1.51	3.43	1.3	2.35	138.47	4.5	78	250.5	123	80	1.19	0.8	2	retire	xxxxxxxxxxx	2021-01-07	Heart center	27	xxxxxx	80		73	6.98	67.8	24.9	5.6	1.4	0.3	4.73	1.74	0.39	0.1	0.02	4.71	144	0.431	91.5	30.6	334
xxxxxxx	27712	xxx	Han	woman	54	162	66	25.1486	4.55	5.23	0.95	4.47	1.38	2.9	909.75	3.6	47	325			1.48	0.85	3	worker	xxxxxxxxxxx	2021-01-07	Heart center	19	xxxxxx	108	0	80	5.24	61.8	29.8	6.5	1.3	0.6	3.24	1.56	0.34	0.07	0.03	4.55	130	0.4	88.6	28.6	323
xxxxxxx	22787	xxx	Han	woman	73	154	67	28.251	5.45	5.43	1.22	4.36	1.6	2.98	222.62	4.6	54	275			1.09	0.93	3	retire	xxxxxxxxxxx	2021-01-07	Heart center	35	xxxxxx	92		98	7.4	66.5	24.7	8.2	0.5	0.1	4.92	1.83	0.61	0.04	0.01	3.84	121	0.353	91.9	31.5	343
xxxxxxx	22278	xxx	Han	man	48	170	90	31.1419	6.69	7.15	0.97	3.84	1.2	2.81	170.23	4.86	93.4	358.66	155	98	1.05	0.93		worker	xxxxxxxxxxx	2021-01-07	Heart center	30	xxxxxx	96		71	6.78	58.1	28.9	6	6.3	0.7	3.94	1.96	0.41	0.43	0.05	5.64	159	0.494	87.6	28.2	322
xxxxxxx	22272	xxx	Han	man	68	173	87	29.0688	15.67	7.89	1.56	2.28	0.73	1.46	167.94	8.4	108.72	313.72	123	72	0.93	0.38	3	retire	xxxxxxxxxxx	2021-01-07	Heart center	32	xxxxxx	102		61	9.1	62.6	23.5	8	5.1	0.8	5.7	2.14	0.73	0.46	0.07	4.64	145	0.423	91.2	31.3	343
xxxxxxx	22275	xxx	Han	man	76	170	61	21.1073	4.5	5.37	0.61	2.41	1.2	1.26	145	8.5	85	100	101	70	1.06	0.48	3	worker	xxxxxxxxxxx	2021-01-08	Heart center	25	xxxxxx	82		72	5.2	53.3	32.5	10.1	3.1	1	2.77	1.69	0.53	0.16	0.05	4.5	143	0.46	102.4	31.7	310
xxxxxxx	27694	xxx	Han	woman	71	152	73	31.5963	7.34	7.31	1.23	3.08	1.09	2.21	300.3	4.9	77	241.3			1.38	0.54	2	retire	xxxxxxxxxxx	2021-01-09	Heart center	33	xxxxxx	90	-	51	6.6	54.5	35.6	9.1	0.5	0.3	3.6	2.35	0.6	0.03	0.02	4.06	123	0.39	95.1	30.3	319
xxxxxxx	27700	xxx	Han	woman	64	167	71	25.4581	4.5	5.49	2.04	3.28	1.1	1.7	115	6.01	54.14	416.88			1.3	0.62	1		xxxxxxxxxxx	2021-01-09	Heart center	28	xxxxxx			75	7.36	56.4	36.4	5.4	1.4	0.4	4.15	2.68	0.4	0.1	0.03	4.35	134	0.393	90.3	30.8	341
xxxxxxx	27698	xxx	Han	woman	60	160	77	30.0781	6.37	5.47	1	4.74	1.26	3.7	411	4.47	49.59	275.34			1.24	0.95	2	retire	xxxxxxxxxxx	2021-01-09	Heart center	19	xxxxxx			63	5.68	43	48.4	4.4	4	0.2	2.44	2.75	0.25	0.23	0.01	4.29	136	0.416	97	31.7	327
xxxxxxx	27729	xxx	Han	woman	68	155	68	28.3039	7.35	7.61	1.52	5.79	1.47	4.83	165.89	5.7	89	223.5			1.68	1.27		retire	xxxxxxxxxxx	2021-01-09	Heart center	17	xxxxxx	78		64	8.64	67.1	26.2	6.4	0	0.3	5.8	2.26	0.55	0	0.03	4.07	124	0.37	91.9	30.5	332
xxxxxxx	27736	xxx	Han	man	65	175	73	23.8367	4.44	5.2	1.63	3.8	0.91	2.48	921.84	4.4	75	302			1.08	0.89	5	retire	xxxxxxxxxxx	2021-01-09	Heart center	17	xxxxxx	98	-	62	6.31	61.9	28.2	6.8	2.9	0.2	3.91	1.78	0.43	0.18	0.01	4.55	137	0.422	92.7	30.1	325
xxxxxxx	27715	xxx	Han	woman	42	165	65	23.8751	4.3	5.33	0.83	3.43	1.22	2.06	81.07	4.9	59	232	107	66	1.23	0.61	4		xxxxxxxxxxx	2021-01-10	Heart center	32	xxxxxx			80	4.85	43.3	47.4	5.4	3.7	0.2	2.1	2.3	0.26	0.18	0.01	4.45	139	0.411	92.4	31.2	338
xxxxxxx	27747	xxx	Uygur	man	51	175	100	32.6531	4.32	5.33	1.16	3.48	0.72	2.43	118.86	4.3	66	252			0.87	0.75	1	farmer	xxxxxxxxxxx	2021-01-10	Heart center	4	xxxxxx	98	-	74	5.85	52.3	37.6	7	2.2	0.9	3.06	2.2	0.41	0.13	0.05	5.41	156	0.48	88	28.8	328
xxxxxxx	22298	xxx	Han	man	50	178	85	26.8274	4.94	5.26	0.91	2.85	1.3	1.85	244.13	5.8	88	350.4	117	68	1.16	0.56	4		xxxxxxxxxxx	2021-01-10	Heart center	21	xxxxxx	98		63	4.7	64.5	26.8	5.9	2.2	0.6	3.03	12.6	0.28	0.1	0.03	3.95	126	0.365	92.5	32.1	346
xxxxxxx	22283	xxx	Han	man	50	174	75	24.7721	4.59	5.06	1.4	2.95	1.05	1.81	172.42	6.86	69.67	263.29	124	75	1.11	0.5	5	teacher	xxxxxxxxxxx	2021-01-10	Heart center	6	xxxxxx	98		72	7.63	55.5	34.7	6.9	2	0.9	4.23	2.65	0.53	0.15	0.07	5.28	167	0.524	99	31.6	319
xxxxxxx	27642	xxx	Han	woman	68	157	70	28.3987	5.01	4.3	1.5	3.25	1.37	1.9	78	3.91	68.69	286.04			1.55	0.65	4	retire	xxxxxxxxxxx	2021-01-10	Heart center	11	xxxxxx	101	-	72	4.6	58.7	30.4	8.7	2.2	0	2.7	1.4	0.4	0.1	0	3.84	125	0.375	97.9	32.6	332
xxxxxxx	27717	xxx	Han	man	49	175	85	27.7551	5.08	5.33	1.03	3.11	1.15	1.67	183.11	5.4	92	535	95	71	1.2	0.56	3	worker	xxxxxxxxxxx	2021-01-10	Heart center	7	xxxxxx	101	-	63	5.63	43.6	48.5	5.7	2	0.2	2.45	2.73	0.32	0.11	0.01	5.01	162	0.472	94.2	32.3	343
xxxxxxx	22284	xxx	Han	man	64	170	76	26.2976	4.24	5.33	1.15	5.5	0.59	4.66	205.82	4.64	80.81	313	121	77	0.71	1.28	1	farmer	xxxxxxxxxxx	2021-01-10	Heart center	1	xxxxxx	102		82	5.53	62.4	28.4	8.3	0.7	0.2	3.45	1.57	0.46	0.04	0.01	4.51	135	0.4	88.2	29.9	339
xxxxxxx	22291	xxx	Uygur	man	68	180	84	25.9259	5.97	5.64	1.23	3.16	1.01	1.72	145.3	8.6	106	218	130	70	1.19	0.69		retire	xxxxxxxxxxx	2021-01-10	Heart center	25	xxxxxx	110		65	7.38	57.5	29.5	7	5	5.3	4.24	2.18	0.52	0.7	4.24	4.75	145	0.429	90.3	30.5	338
xxxxxxx	27797	xxx	Uygur	man	66	173	82	27.3982	15.21	7.37	1.76	3.6	0.73	2.41	160.99	5.1	45	235.1	220	140	0.96	0.86	2	civil servant	xxxxxxxxxxx	2021-01-10	Heart center	21	xxxxxx	66	o	72	6.17	89.8	8.4	1.3	0.2	0.3	5.54	0.52	0.08	0.01	0.02	4.65	143	0.43	91.6	30.8	336
xxxxxxx	27739	xxx	Uygur	man	61	167	80	28.6851	6.06	7.5	2.91	5.8	1.05	3.79	534.39	8.4	72	295	134	62	1.33	1.18	4	teacher	xxxxxxxxxxx	2021-01-11	Heart center	2	xxxxxx	90	-	66	6.18	47.1	37.1	10.5	5	0.3	2.91	2.29	0.65	0.31	0.02	4.8	140	0.434	90.4	29.2	323
xxxxxxx	22319	xxx	Uygur	man	58	170	101	34.9481	5.34	5.34	1.38	6.71	1.72	4.79	877.62	3.98	68.9	311.76	180	110	1.15	1.31		cadre	xxxxxxxxxxx	2021-01-11	Heart center	34	xxxxxx	116		82	9.4	76.5	14.7	5.9	1.4	1.5	7.19	1.38	0.55	0.13	0.14	4.35	134	0.397	91.3	30.7	336
xxxxxxx	27644	xxx	Han	woman	70	168	74	26.2188	12.44	8.08	0.91	3.74	1.31	2.1	758.55	5.6	62	311.5			1.37	0.65	2	farmer	xxxxxxxxxxx	2021-01-11	Heart center	40	xxxxxx	92	-	69	9.59	86.5	13	0.4	0	0.1	8.3	1.25	0.04	0	0.01	4.61	140	0.42	91.5	30.4	332
xxxxxxx	27763	xxx	Han	man	59	160	54	21.0937	4.95	5.12	1.61	4.48	1.38	2.9	213.76	7.19	68.61	225.63	111	70	1.46	0.85	2		xxxxxxxxxxx	2021-01-11	Heart center	29	xxxxxx	61	o	95	6.69	64.3	22.1	9	3	1.6	4.3	1.48	0.6	0.2	0.11	4.77	140	0.43	91	29.4	323
xxxxxxx	27767	xxx	Han	man	78	165	73	26.8136	4.13	5.03	2.19	4.35	1.06	3.19	152.85	4.9	91	356.3	160	901	0.96	0.97	2	retire	xxxxxxxxxxx	2021-01-11	Heart center	6	xxxxxx	63	o	63	9.06	65.7	26.6	5.8	1.7	0.2	5.95	2.41	0.53	0.15	0.02	4.44	138	0.43	96.8	31.1	321
xxxxxxx	27769	xxx	Uygur	man	51	178	91	28.7211	3.52	5.33	1	4.9	1.33	3.21	108.24	5.9	91	403	116	77	1.4	0.92	6	office worker	xxxxxxxxxxx	2021-01-12	Heart center	9	xxxxxx	69	o	74	7.35	52	35.2	9	3.3	0.5	3.82	2.59	0.66	0.24	0.04	5.39	156	0.48	88.7	28.9	326
xxxxxxx	27799	xxx	Han	woman	67	150	54	24	4.37	5.53	1.2	2.91	0.85	1.77	993.42	3.4	64	134	180	100	0.93	0.59	1	retire	xxxxxxxxxxx	2021-01-12	Heart center	39	xxxxxx	57	o	66	3.52	59.9	30.4	7.1	2.6	0	2.11	1.07	0.25	0.09	0	4	124	0.383	95.8	32	324
xxxxxxx	27768	xxx	Han	man	57	177	73	23.3011	4.6	5.3	0.96	2.93	0.78	1.89	164.07	4.7	82	268	118	73	0.92	0.63	5	retire	xxxxxxxxxxx	2021-01-12	Heart center	42	xxxxxx	68	o	56	6.74	55.8	34.6	7.7	1.6	0.3	3.76	2.33	0.52	0.11	0.02	3.99	123	0.384	96.2	30.8	320
xxxxxxx	27766	xxx	Han	man	65	175	72	23.5102	5.74	5.58	0.86	2.91	1.62	1.23	44.77	3.6	80	312	190	100	1.47	0.43	2	retire	xxxxxxxxxxx	2021-01-12	Heart center	25	xxxxxx	67	o	84	6.71	68.9	21.6	7.6	1.5	0.4	4.62	1.45	0.51	0.1	0.03	4.57	142	0.424	92.8	31.1	335
xxxxxxx	27745	xxx	Han	man	53	172	72	24.3375	4.57	5.68	2.18	5.82	1.18	4.59	205.78	7.4	77	371.4	110	87	1.63	1.25	2	office worker	xxxxxxxxxxx	2021-01-12	Heart center	53	xxxxxx	102	-	79	5.77	55.6	34.7	7.6	1.4	0.7	3.21	2	0.44	0.08	0.04	4.75	159	0.47	99.8	33.5	335
xxxxxxx	27778	xxx	Han	man	52	172	76	25.6896	4.26	5.47	0.94	3.54	1.26	2.03	53.55	3.9	55	294	160	100	1.39	0.62	3	office worker	xxxxxxxxxxx	2021-01-13	Heart center	27	xxxxxx	66	o	84	4.94	59.7	30.8	7.5	1.8	0.2	2.95	1.52	0.37	0.09	0.01	4.74	145	0.441	93	30.6	329
xxxxxxx	22385	xxx	Uygur	woman	69	165	80	29.3848	6.07	5.86	3.31	3.95	0.85	2.73	45.36	3.15	48.23	302.36			1.11	0.97	5	retire	xxxxxxxxxxx	2021-01-13	Heart center	3	xxxxxx	97		78	6.69	49.7	42.3	7.2	0.4	0.4	3.32	2.83	0.48	0.03	0.03	4.31	128	0.395	91.6	29.7	324
xxxxxxx	27770	xxx	Uygur	man	60	178	85	26.8274	5.45	5.42	1.27	3.02	0.92	1.79	111.33	7.1	76	371	101	67	1.11	0.62	5	retire	xxxxxxxxxxx	2021-01-13	Heart center	1	xxxxxx	68	o	68	5.66	46.9	39.9	6.2	5.1	1.9	2.65	2.26	0.35	0.29	0.11	4.39	141	0.416	94.8	32.1	339
xxxxxxx	27748	xxx	Han	man	72	165	80	29.3848	9.11	8.28	1.26	5.69	1.17	4.16	248.3	3.6	54.44	224.12			1.55	1.07	1	retireworker	xxxxxxxxxxx	2021-01-13	Heart center	27	xxxxxx			78	9.56	78.6	10	7	0	0.4	7.51	1.34	0.67	0	0.04	5.24	160	0.47	90.3	30.5	338
xxxxxxx	27855	xxx	Han	woman	63	152	60	25.9695	7.61	7.54	1.41	5.98	1.79	4.58	496.28	5.8	53	224.5	154	61	1.41	1.15	1	cleaner	xxxxxxxxxxx	2021-01-17	Heart center	38	xxxxxx	57	o	76	3.98	51.5	37.2	9.5	1.5	0.3	2.05	1.48	0.38	0.06	0.01	4.02	116	0.37	91.6	28.9	314
xxxxxxx	22763	xxx	Han	man	64	172	86	29.0698	6.08	5.76	1.64	5.38	1.26	4.23	396.31	3.5	65	250	136	67	1.12	1.37	2	retire	xxxxxxxxxxx	2021-01-17	Heart center	28	xxxxxx	97	b	60	6.34	56.7	33.6	6.5	3	0.2	3.59	2.13	0.41	0.19	0.01	4.18	142	0.415	99.3	34	342
xxxxxxx	27865	xxx	Uygur	man	77	170	50	17.301	4.72	5.15	0.89	3.4	1.07	2.53	376.45	6.1	60	311.9	180	90	1.16	0.77	2	retire	xxxxxxxxxxx	2021-01-17	Heart center	42	xxxxxx	64	o	69	5.7	55	25.3	9.1	0.4	3.13		1.44	0.52	0.58	0.02	3.3	94	0.3	90.9	28.5	313
xxxxxxx	22509	xxx	Uygur	man	47	175	94	30.6939	4.59	5.55	2.21	5.54	0.88	3.78	80.48	5.1	81	429			1.1	1.28	1	farmer	xxxxxxxxxxx	2021-01-18	Heart center	12	xxxxxx	98		77	7.34	54.7	37.3	5.7	2	0.3	4.01	2.74	0.42	0.15	0.02	5.44	159	0.47	86.4	29.2	338
xxxxxxx	22497	xxx	Han	man	72	167	54	19.3625	10.49	7.09	1.34	2.94	0.73	2.04	289.16	3.59	81.15	332.68			0.88	0.51	1	farmer	xxxxxxxxxxx	2021-01-18	Heart center	34	xxxxxx	69		79	6.17	70.2	20.7	6.3	1.8	1	4.33	1.28	0.39	0.11	0.06	4.44	126	0.398	89.6	28.4	317
xxxxxxx	27856	xxx	Han	man	60	180	75	23.1481	5.8	8.38	0.7	2.8	0.98	1.46	106.57	5.3	50	316	172	67	1.05	0.55	2	office worker	xxxxxxxxxxx	2021-01-18	Heart center	22	xxxxxx	68	o	85	8.87	53	36.4	8.5	1.6	0.5	4.7	3.23	0.75	0.14	0.04	4.16	125	0.378	90.9	30	331
xxxxxxx	27864	xxx	Han	man	71	167	65	23.3067	4.53	5.18	0.83	2.7	0.9	1.39	135.81	3.7	68	279	180	90	0.98	0.53	2	retire	xxxxxxxxxxx	2021-01-18	Heart center	6	xxxxxx	63	o	74	5.98	67.9	17.9	8.7	5.5	0	4.06	1.07	0.52	0.33	0	4.18	139	0.394	94.3	33.3	353
xxxxxxx	27862	xxx	Uygur	man	55	162	74	28.1969	4.33	5.17	1.48	3.43	0.91	1.96	58.3	3.3	61	262	127	77	1.08	0.75	5	teacher	xxxxxxxxxxx	2021-01-18	Heart center	41	xxxxxx	62	o	77	6.85	52.9	34.6	7.7	4.2	0.6	3.62	2.37	0.53	0.29	0.04	4.91	151	0.46	93.7	30.8	328
xxxxxxx	27863	xxx	Uygur	man	46	178	98	30.9304	6.13	5.46	2.66	3.49	1.19	2.54	148.41	4.5	107	404	102	60	1.14	0.73	3	office worker	xxxxxxxxxxx	2021-01-18	Heart center	32	xxxxxx	70	a	72	14.15	56.7	34.4	4.9	3.7	0.3	8.02	4.87	0.69	0.52	0.04	5.13	159	0.464	90.4	31	343
xxxxxxx	27895	xxx	Uygur	woman	71	160	45	17.5781	6.52	5.24	0.82	2.91	0.92	1.53	987.61	5.22	45.03	177.31	110	60	1.1	0.53	1	farmer	xxxxxxxxxxx	2021-01-19	Heart center	14	xxxxxx	58	o	71	5.38	42.9	41.8	12.3	2.4	0.6	2.31	2.25	0.66	0.13	0.03	4.39	126	0.39	88.8	28.7	323
xxxxxxx	22475	xxx	Han	woman	72	177	72	22.9819	6.22	5.98	1.57	5.5	1.023	3.98	164.71	5.7	86	349			1.25	1.26	2	retire	xxxxxxxxxxx	2021-01-19	Heart center	42	xxxxxx	80		71	8.14	41.5	46.2	7.4	4.7	0.2	3.38	3.76	0.6	0.38	0.02	4.95	155	0.453	91.5	31.3	342
xxxxxxx	25516	xxx	Han	man	48	173	88	29.4029	5.21	5.74	7.15	5.92	0.84	2.24	594.34	7.7	8	341			1.35	0.84	4	driver	xxxxxxxxxxx	2021-01-20	Heart center	49	xxxxxx	89		76	6.22	49.5	40.4	0.44	0.17	0.3	3.08	2.51	0.44	0.17	0.02	5.21	161	0.464	89.1	30.9	347
xxxxxxx	22561	xxx	Han	woman	62	162	60	22.8624	6.12	5.49	0.69	3.08	1.06	1.7	132.33	8.3	50	243			0.07	0.63	5	retire	xxxxxxxxxxx	2021-01-23	Heart center	41	xxxxxx	63		72	4.34	66.3	22.6	10.1	0.5	0.5	2.88	0.98	0.44	0.02	0.02	4.19	117	0.354	84.5	27.9	331
xxxxxxx	22636	xxx	Uygur	man	55	175	76	24.8163	4.68	5.36	1.18	4.03	1.31	2.93	190.56	5.8	76	322.4			1.07	0.96	6	worker	xxxxxxxxxxx	2021-01-26	Heart center	28	xxxxxx	95		76	5.74	50.7	40.4	7.7	1	0.2	2.91	2.32	0.44	0.06	0.01	4.74	147	0.439	92.6	31	335
xxxxxxx	28089	xxx	Han	man	77	170	57	19.7232	8.04	6.29	0.72	3.53	1.39	2.42	151.02	4.36	89.47	329	130	87			2	farmer	xxxxxxxxxxx	2021-01-26	Heart center	6	xxxxxx	65		87	9.45	77.5	11.2	9	1.6	0.7	7.32	1.06	0.85	0.15	0.07	4.75	141	0.42	88.4	29.7	336
xxxxxxx	28031	xxx	Han	man	44	175	96	31.3469	5.52	4.6	2.14	2.74	0.68	1.55	181.94	6.72	73.62	353	122	70	1.09	0.62	1	farmer	xxxxxxxxxxx	2021-01-26	Heart center	26	xxxxxx	95		69	6.26	48.5	42.7	5.8	2.2	0.8	3.04	2.67	0.36	0.14	0.05	5.2	148	0.46	87.8	28.5	325
xxxxxxx	25145	xxx	Uygur	man	57	175	71	23.1837	2.86	5.08	3.33	3.41	0.62	2.52	384.87	4.2	64	342	93	61	1.06	0.87	3		xxxxxxxxxxx	2021-01-26	Heart center	19	xxxxxx	66	b	66	7.49	61.6	29.9	6.9	1.2	0.4	4.61	2.24	0.52	0.09	0.03	4.73	141	0.441	93.2	29.8	320
xxxxxxx	28061	xxx	Uygur	man	48	165	74	27.1809	3.93	8.48	0.71	3.59	1	2.3	504.52	2.5	74	157	180	100	0.97	0.77	3	office worker	xxxxxxxxxxx	2021-01-26	Heart center	18	xxxxxx	80		60	5.77	59.1	32.6	6.8	1	0.5	3.41	1.88	0.39	0.06	0.03	4.88	147	0.43	88.5	30.1	340
xxxxxxx	28066	xxx	Han	man	63	184	85	25.1063	4.52	5.44	0.91	3.13	1.35	1.69	20.51	2.6	81	364	138	81	1.36	0.48	5	retire	xxxxxxxxxxx	2021-01-27	Heart center	34	xxxxxx	80		70	6.37	66.5	25	7.5	0.8	0.8	4.24	1.59	0.48	0.05	0.01	4.84	152	0.452	93.4	31.4	336
xxxxxxx	28071	xxx	Han	man	76	165	76	27.9155	4.43	5.41	1.59	2.96	1.25	1.84	192.19	87	81	583.1	140	90	1.53	0.52	1	retire	xxxxxxxxxxx	2021-01-27	Heart center	41	xxxxxx	80		68	7.37	46.9	42.6	8	1.8	0.7	3.46	3.14	0.59	0.13	0.05	4.56	145	0.44	95.6	31.8	333
xxxxxxx	28056	xxx	Uygur	man	53	174	105	34.6809	4.53	5.31	3.79	3.8	0.76	2.14	38.79	4	75	461	181	101	1.08	0.8	5	retire	xxxxxxxxxxx	2021-01-27	Heart center		xxxxxx	95		90	6.78	67.3	23.6	6.6	2.1	0.4	4.56	1.6	0.45	0.14	0.03	4.58	141	0.43	93.9	30.8	328
xxxxxxx	28086	xxx	Uygur	man	44	167	90	32.2708	4.7	4.61	1.7	3.64	1.23	2.56	148.82	4.85	106.76	366	160	120	1.09	0.77	4	civil servant	xxxxxxxxxxx	2021-01-28	Heart center	33	xxxxxx	95		76	6.88	66.3	21.2	8.6	2.9	1	4.56	1.46	0.59	0.2	0.07	6.02	178	0.53	87.4	29.6	338
xxxxxxx	28064	xxx	Han	man	51	178	90	28.4055	9.18	8.1	3.67	5.18	0.85	4.21		7.09	84.75	330.84	148	94			4	civil servant	xxxxxxxxxxx	2021-01-28	Heart center	2	xxxxxx	95		86	10.22	73.7	17.2	7.9	1.1	0.1	7.53	1.76	0.81	0.11	0.01	4.75	154	0.44	92	32.4	352
xxxxxxx	28083	xxx	Uygur	man	62	165	70	25.7117	7.12	6.77	0.68	3.25	1.25	2.31	110.68	4.57	85.3	333	112	62	0.94	0.61	1	retire	xxxxxxxxxxx	2021-01-28	Heart center	7	xxxxxx	75		74	7.57	53.3	32	13.3	0.9	0.5	4.03	2.42	1.01	0.07	0.04	4.76	139	0.42	87.8	29.2	333
xxxxxxx	28063	xxx	Han	man	62	174	86	28.4053	8.06	7.54	2.01	3.27	0.31	2.06	177	5.7	91	466.4	180	100	1.29	0.54	3	administrative staff	xxxxxxxxxxx	2021-01-29	Heart center	47	xxxxxx	88		72	9.35	85.8	10.6	1.6	1.7	0.3	8.02	0.99	0.13	0.16	0.03	3.94	124	0.38	95.4	31.5	330
xxxxxxx	28068	xxx	Uygur	man	76	170	66	22.8374	11.93	7.54	2.13	3	0.86	1.99	275.71	6.7	101	248	160	90	1.04	0.51	6	retire	xxxxxxxxxxx	2021-01-29	Heart center	45	xxxxxx	60		70	6.67	55.3	33.3	7.9	3.4	0.1	3.69	2.22	0.53	0.23	0.01	4.45	136	0.39	88.5	30.6	345
xxxxxxx	28081	xxx	Han	man	71	176	69	22.2753	5.03	5.56	0.95	3.55	1.04	2.32	303.85	8.1	94	455	108	65	1.04	0.79	5	retire	xxxxxxxxxxx	2021-01-30	Heart center	4	xxxxxx	72		64	6.56	61.1	22.6	9.6	6.1	0.6	4.01	1.48	0.63	0.4	0.04	4.69	144	0.42	90.2	30.7	340
xxxxxxx	27551	xxx	Han	man	69	181	82	25.0298	4.66	7.53	1.98	3.25	0.89	2.42	306.31	4.7	76	352.8	133	73	0.91	0.76	5	retire	xxxxxxxxxxx	2021-01-30	Heart center	45	xxxxxx	80		72	7.68	64.6	26.7	6.8	1.2	0.7	4.96	2.05	0.52	0.09	0.05	4.39	130	0.4	91.3	29.6	324
xxxxxxx	28093	xxx	Han	man	61	170	70	24.2215	17.15	7.36	1.89	4.53	0.92	3.11	244.6	4.9	77.25	292	160	100	1.09	0.95	2	retire	xxxxxxxxxxx	2021-01-30	Heart center	32	xxxxxx	75		75	6.35	50.6	40.6	6.9	1.1	0.8	3.21	2.58	0.44	0.07	0.05	4.3	128	0.38	88.1	29.8	338
xxxxxxx	28017	xxx	Uygur	woman	59	158	68	27.2392	4.77	5.2	1.22	6.76	1.13	5.45	522.06	7.5	51	413.4	137	82	1.2	1.5	4	retire	xxxxxxxxxxx	2021-01-31	Heart center	42	xxxxxx	82		69	8.9	74.4	18.7	69	0	0	6.62	1.66	0.61	0	0	3.63	114	0.388	106.3	31.3	294
xxxxxxx	28016	xxx	Han	woman	79	158	60	24.0346	5.44	4.86	1.91	2.81	1.19	1.82	151.14	6	66	258.7	180	100	1.19	0.57	1	retire	xxxxxxxxxxx	2021-01-31	Heart center		xxxxxx	75		70	7.18	74.7	18.5	5.4	1	0.4	5.36	1.33	0.39	0.07	0.03	4.43	127	0.4	79.4	28.7	321
xxxxxxx	22779	xxx	Han	woman	63	160	57	22.2656	4.95	5.02	0.9	3.59	1.24	2.24	268.3	5.2	25.67	200.86	120	60	1.26	0.63	0	retire	xxxxxxxxxxx	2021-01-31	Heart center	28	xxxxxx	88	o	70	5.07	62.9	26.2	7.1	2.8	1	3.19	1.33	0.36	0.14	0.05	4.28	133	0.402	93.9	31.1	331
xxxxxxx	22797	xxx	Han	woman	60	170	67	23.1834	4.73	5.71	2.48	3.96	0.84	2.66	79.81	5.1	57	336			1.03	0.89	5	retire	xxxxxxxxxxx	2021-01-31	Heart center	26	xxxxxx	85		98	6.08	48.3	43.4	6.1	2	0.2	2.94	2.64	0.37	0.12	0.01	4.28	134	0.398	93	31.3	337
xxxxxxx	28018	xxx	Han	man	51	166	60	21.7738	4.92	4.83	2.7	3.01	0.6	2.07	351.22	5	119	482.5			0.86	0.64	4	office worker	xxxxxxxxxxx	2021-01-31	Heart center	8	xxxxxx				15.92	92	5.8	1.8	0.2	0.2	14.65	0.92	0.29	0.03	0.03	3.9	123	0.37	93.6	31.5	337
xxxxxxx	28096	xxx	Uygur	man	73	185	85	24.8356	4.24	5.16	1.17	3.69	0.59	2.88	452.95	6.2	85	270.3	230	120	0.8	0.83	3	retire	xxxxxxxxxxx	2021-01-31	Heart center		xxxxxx	80		68	7.13	62.2	26.4	9.7	1	0.7	4.43	1.88	0.69	0.07	0.05	3.36	82	0.28	83.6	24.4	292
xxxxxxx	29967	xxx	Han	woman	73	160	75	29.2969	8.41	7.83	3.3	6.06	1.35	3.68	682.9	8.7	46	314			1.67	0.86	2	retire	xxxxxxxxxxx	2021-02-01	Heart center	24	xxxxxx	93	0	68	6.31	60.5	29.2	8.6	1.4	0.3	3.82	1.84	0.54	0.09	0.02	4.12	131	0.4	97.3	31.8	327
xxxxxxx	28120	xxx	Han	man	49	170	80	27.6817	5	5.05	2.44	3.62	0.77	2.54	228.62	3.7	78	350.5	126	57	1.12	0.82		worker	xxxxxxxxxxx	2021-02-01	Heart center	52	xxxxxx	89	ab	66	9.27	91.2	7.9	0.6	0	0.3	8.45	0.73	0.06	0	0.03	5.38	164	0.47	86.6	30.5	352
xxxxxxx	22795	xxx	Han	man	54	174	76	25.1024	4.94	5.62	2.19	4.95	1.08	3.44	243.12	6.9	56	291	135	80	1.29	1.03	2	farmer	xxxxxxxxxxx	2021-02-01	Heart center	26	xxxxxx	87	b	72	7.52	54.8	37.9	4.9	2.3	0.1	4.12	2.85	0.37	0.17	0.01	4.64	153	0.454	97.8	33	337
xxxxxxx	28115	xxx	Uygur	man	56	175	70	22.8571	3.67	5.35	1.04	3.71	0.67	2.52	73.23	5.4	82	209	160	110	0.86	0.84	4	office worker	xxxxxxxxxxx	2021-02-01	Heart center	27	xxxxxx	68		82	9.64	65.4	20.2	92	2.2	0.2	6.3	1.95	1.16	0.21	0.02	5.02	151	0.472	94	30.1	320
xxxxxxx	22755	xxx	Han	woman	52	162	63	24.0055	4.67	5.5	1.86	4.78	1.24	3.26	158.62	5.8	48	204	120	70	1.26	0.9	2	farmer	xxxxxxxxxxx	2021-02-02	Heart center	5	xxxxxx	79	b	88	5.52	50.1	42.8	4.5	2.4	0.2	2.77	2.36	0.25	0.13	0.01	4.77	136	0.422	88.5	28.5	322
xxxxxxx	22764	xxx	Han	woman	74	170	76	26.2976	4.8	5.4	1.15	4.88	1.87	2.9	152.92	4.2	66	356			1.51	0.71	1	not in detail	xxxxxxxxxxx	2021-02-02	Heart center	19	xxxxxx	90		60	5.74	54.1	37.6	6.4	1.6	0.3	3.11	2.16	0.37	0.09	0.02	4.23	127	0.391	92.4	30	325
xxxxxxx	22767	xxx	Han	woman	71	164	64	23.7954	7.07	7.3	1.11	2.79	1.19	1.62	209.7	3.2	59	251.1			1.34	0.41	4	retire	xxxxxxxxxxx	2021-02-02	Heart center	7	xxxxxx	79	a	97	5.69	51.7	40.6	6.3	1.2	0.2	2.94	2.31	0.36	0.07	0.01	5.09	146	0.427	83.9	28.7	342
xxxxxxx	28112	xxx	Han	man	42	174	80	26.4236	8.06	6.81	1.53	3.47	0.76	2.03	148.87	4.21	69.65	289.73	125	64	1.47	0.7	2		xxxxxxxxxxx	2021-02-02	Heart center	13	xxxxxx	85		78	5.01	51.9	34.1	9.2	4.2	0.6	2.6	1.71	0.46	0.21	0.03	4.47	137	0.41	91.5	30.6	335
xxxxxxx	22789	xxx	Han	man	60	178	95	29.9836	4.03	5.36	1.31	3.81	0.84	2.64	155.9	6.6	78	318			0.88	0.95	2	staff	xxxxxxxxxxx	2021-02-02	Heart center	19	xxxxxx	98		100	7.68	54.6	36.6	4.8	3.9	0.1	4.19	2.81	0.37	0.3	0.01	4.68	145	0.439	93.8	31	330
xxxxxxx	22810	xxx	Han	man	65	160	71	27.7344	5.19	4.8	1	3.76	1.78	2.17	359.3	5.03	81.12	256.01			1.45	0.72	5	retire	xxxxxxxxxxx	2021-02-02	Heart center	34	xxxxxx	89	o	76	4.98	57.5	32.7	6.4	3.2	0.2	2.86	1.63	0.32	0.16	0.01	4.86	156	0.449	92.4	32	347
xxxxxxx	22776	xxx	Uygur	man	54	173	74	24.7252	4.89	5.57	3.55	5.12	1.27	3.14	134.44	7.5	74	370			1.45	1.07	6	civil servant	xxxxxxxxxxx	2021-02-02	Heart center	3	xxxxxx	83	ab	95	5.37	49.9	41.3	5.2	3	0.6	2.68	2.22	0.28	0.16	0.03	5.08	159	0.462	90.9	31.3	344
xxxxxxx	22760	xxx	Uygur	man	53	172	85	28.7317	6.87	7.83	4.17	4.56	0.98	3.09	160.82	10.11	110.48	439	110	70	1.25	0.82	3	civil servant	xxxxxxxxxxx	2021-02-03	Heart center	25	xxxxxx	96	10	90	8.19	47.2	40.4	8.2	3.3	0.9	3.87	3.31	0.67	0.27	0.07	5.42	161	0.478	88.2	29.7	337
xxxxxxx	22766	xxx	Han	man	50	171	75	25.6489	6.37	8.69	1.69	3.34	0.6	2.22	443.54	6.7	90	295			0.97	0.8	6	office worker	xxxxxxxxxxx	2021-02-03	Heart center	42	xxxxxx	82		76	10.83	86.1	11.9	1.3	0.3	0.4	9.32	1.29	0.14	0.03	0.04	4.52	123	0.378	83.6	27.2	325
xxxxxxx	22785	xxx	Uygur	woman	77	160	50	19.5312	4.63	5.63	2.61	3.22	1.21	2.1		4.9	106	396.2			0.95	0.69	1	retire	xxxxxxxxxxx	2021-02-04	Heart center	28	xxxxxx	75		53	6.24	52.9	36.7	7.5	2.1	0.8	3.3	2.29	0.47	0.13	0.05	4.38	123	0.395	90.2	28.1	311
xxxxxxx	22995	xxx	Han	man	81	170	86	29.7578	6.46	4.93	2.33	3.76	1.01	1.69	50.96	7.99	116.86	413	99	70	1.41	0.72	1	retire	xxxxxxxxxxx	2021-02-04	Heart center	34	xxxxxx	98		107	5.2	69.4	18	9.5	1.5	1.6	3.61	0.94	0.49	0.08	0.08	3.25	102	0.3	0.3	92	313
xxxxxxx	22780	xxx	Han	man	36	181	97	29.6084	4.13	5.19	2.03	5.26	0.92	3.81	110	5.28	84.66	417.79	112	76	1.17	0.85	5		xxxxxxxxxxx	2021-02-04	Heart center	16	xxxxxx	103		76	7.85	34.1	53.9	7.3	4.3	0.4	2.68	4.23	0.57	0.34	0.03	4.96	161	0.473	95.4	32.5	340
xxxxxxx	22802	xxx	Han	man	64	156	59	24.2439	4.91	5.13	1.32	2.81	0.84	1.82	549	3.99	85.08	313.58	105	60	1.09	0.48	1	retire	xxxxxxxxxxx	2021-02-04	Heart center	37	xxxxxx	84		82	5.72	63.3	23.8	7	5.4	0.5	3.62	1.36	0.4	0.31	0.03	4.64	143	0.413	89	30.8	246
xxxxxxx	22765	xxx	Uygur	man	60	160	70	27.3437	4.77	4.81	2.33	3.47	0.8	2.43	296.1	7.08	67.12	288.42			1.02	0.69	3	sell	xxxxxxxxxxx	2021-02-04	Heart center	10	xxxxxx	89	b	75	7.33	43.7	45.7	8.3	1.2	1.1	3.2	3.35	0.61	0.09	0.08	5.11	152	0.475	93	29.7	320
xxxxxxx	22770	xxx	Han	woman	65	160	63	24.6094	5.95	5.22	0.99	4.3	1.47	2.8	216.64	7.57	49.58	285.77	123	73	1.42	0.69	1	retire	xxxxxxxxxxx	2021-02-05	Heart center	26	xxxxxx	74		68	4.65	42.1	46.7	8.2	2.6	0.4	1.96	2.17	0.38	0.12	0.12	4.03	124	0.379	94	30.8	327
xxxxxxx	22753	xxx	Uygur	man	48	163	78	29.3575	3.99	5.51	2.87	4.85	0.78	3.26	150.26	5	85	404			1.25	0.97	3	worker	xxxxxxxxxxx	2021-02-08	Heart center	27	xxxxxx	86		72	7.56	56.5	32.4	6.9	4.1	0.1	4.27	2.45	0.52	0.31	0.01	5.5	159	0.449	87.2	30.9	354
xxxxxxx	28019	xxx	Han	man	67	170	71	24.5675	6.07	5.15	1.84	3.2	1.1	1.98	168.15	8	69	251	127	83	1.4	0.32	2	worker	xxxxxxxxxxx	2021-02-08	Heart center	5	xxxxxx	75		75	6.5	47.7	37.8	12.2	1.5	0.8	3.1	2.46	0.79	0.1	0.05	4.86	147	0.44	90.3	30.2	335
xxxxxxx	22285	xxx	Han	man	64	165	78	28.6501	6.15	8	0.92	4.97	0.95	3.61	139.62	4	70	309	180	110	1.17	1.12	2		xxxxxxxxxxx	2021-02-10	Heart center	28	xxxxxx	96		78	4.73	48.4	40.2	8.7	2.5	0.2	2.29	1.9	0.41	0.12	0.01	4.05	138	0.39	96.3	34.1	354
xxxxxxx	22876	xxx	Han	woman	71	160	55	21.4844	5.13	5.43	0.84	3.54	1.4	2	84.69	4.3	63	216	126	66	1.31	0.63	0	not in detail	xxxxxxxxxxx	2021-02-11	Heart center	46	xxxxxx	71		67	6.03	68.8	25.5	4.5	0.7	0.5	4.15	1.54	0.27	0.04	0.03	4.11	120	0.377	91.7	29.2	38
xxxxxxx	28250	xxx	Uygur	man	60	165	68	24.977	9	8.1	2.34	4.3	1.27	3.15	719.49	8.8	11.5	287.7			1.16	0.9	5	office worker	xxxxxxxxxxx	2021-02-14	Heart center	18	xxxxxx	95	0	83	5.9	59.6	28	9.7	2.4	0.3	3.52	1.65	0.57	0.14	0.02	4.61	135	0.417	90.5	29.3	324
xxxxxxx	28254	xxx	Han	man	60	171	74	25.3069	8.76		2.51	3.44	0.79	2.28	198.01								2	not in detail人员	xxxxxxxxxxx	2021-02-14	Heart center	45	xxxxxx	92	B	90	8.47	63.9	28.3	6.6	0.7	0.5	5.41	2.4	0.56	0.06	0.04	4.85	148	0.46	94	30.5	325
xxxxxxx	22901	xxx	Han	woman	70	155	54	22.4766	4.99	5.12	1.97	4.19	1.03	2.58	649.17	3.1	61	219	164	78	1.06	0.89	2	retire	xxxxxxxxxxx	2021-02-16	Heart center	4	xxxxxx	79		83	4.13	87.7	8.7	2.7	0.2	0.7	3.62	0.36	0.11	0.01	0.03	4.32	127	0.397	91.9	29.4	320
xxxxxxx	28251	xxx	Han	man	52	178	82	25.8806	4.77	5.58	3.79	5.18	0.83	3.33	61	7.83	72.89	477.45	115	75	1.06	1.04	6	civil servant	xxxxxxxxxxx	2021-02-16	Heart center	46	xxxxxx	89	0	770	7.6	63.4	28.6	5.1	2.5	0.4	4.82	2.17	0.39	0.19	0.03	5.26	162	0.492	93.5	30.8	329
xxxxxxx	28252	xxx	Uygur	woman	46	155	66	27.4714	4.82	4.91	0.93	2.4	0.85	1.6	157.45	3.6	68	258	119	68	0.85	0.54	4	retire	xxxxxxxxxxx	2021-02-17	Heart center	20	xxxxxx	90	A	74	5.13	64.5	26.3	7.4	1.6	0.2	3.31	1.35	0.38	0.08	0.01	4.51	129	0.412	91.4	28.6	313
xxxxxxx	28743	xxx	Han	man	59	176	81	26.1493	5.97	5.19	2.33	4.96	1.08	3	74	5.08	64.57	435.95			1.59	1.1	3	retire	xxxxxxxxxxx	2021-02-21	Heart center	4	xxxxxx	75	0	82	5.25	48.9	38.7	90.5	2.7	0.2	2.57	2.3	0.5	0.14	0.01	4.73	151	0.454	96	31.9	333
xxxxxxx	22949	xxx	Han	man	66	166	74	26.8544	7.5	7.67	0.76	6.87	1.54	4.97	305.87	4.35	42.82	307.66	220	140	1.49	1.3			xxxxxxxxxxx	2021-02-21	Heart center	14	xxxxxx	88		80	7.11	82.01	0	12	5.9	0	0	5.84	0.85	0.42	0	0	415	13.6	0.39	94.9	328
xxxxxxx	28770	xxx	Han	man	70	180	88	27.1605	4.41	5.16	1.12	3.15	1.29	2.15	217.34	5.5	84	334.2			0.18	0.59	3		xxxxxxxxxxx	2021-02-22	Heart center	46	xxxxxx	83	B	60	5.23	58.7	30.8	7.6	2.5	0.4	3.07	1.61	0.4	0.13	0.02	4.74	147	0.45	94.9	31	327
xxxxxxx	28745	xxx	Han	man	59	168	77	27.2817	4.17	5.45	2.46	5.95	1.25	3.95	118.84	6.4	81	494	126	85	1.54	1.19	5	retire	xxxxxxxxxxx	2021-02-22	Heart center	37	xxxxxx	93	B	86	7.72	51.2	40.8	5.7	1.8	0.5	3.95	3.15	0.44	0.14	0.04	5.13	153	0.491	95.7	29.8	312
xxxxxxx	28742	xxx	Han	man	95	173	80	26.7299	5.7	5.56	0.94	4.9	1.18	3.77	158.21	8.1	56	359	130	70	1.53	0.98	3	Professional and technical personnel	xxxxxxxxxxx	2021-02-22	Heart center	23	xxxxxx		B	100	6.76	58.4	30.5	5.5	5.3	0.3	3.95	2.06	0.37	0.36	0.02	5.48	170	0.515	94	31	330
xxxxxxx	28910	xxx	Uygur	man	43	170	60	20.7612	4.98	5.09	1.85	3.52	0.87	2.59	315.31	5.9	85	271.5			0.98	0.89	2	farmer	xxxxxxxxxxx	2021-02-23	Heart center	34	xxxxxx	74		78	8.13	70.4	24.2	4.7	0.5	0.2	5.72	1.97	0.38	0.04	0.02	4.47	140	0.43	96.2	31.3	326
xxxxxxx	23045	xxx	Uygur	man	54	175	120	39.1837	4.65	5.15	1.46	3.06	0.94	2.36	93	3.2	77	399	126	86	1.02	0.76	2		xxxxxxxxxxx	2021-02-25	Heart center	18	xxxxxx	110		77	7.58	56.3	35.5	5.3	2.4	0.5	4.27	2.69	0.4	0.18	0.04	5.59	159	0.474	84.8	28.4	335
xxxxxxx	22996	xxx	Han	woman	69	168	76	26.9274	5.39	5.36	0.99	4.5	1.25	3.16	217.81				125	99			1	retire	xxxxxxxxxxx	2021-02-25	Heart center	35	xxxxxx	102		78	7.19	86.9	22.2	5.8	0.4	0.3	5.61	1.75	0.46	0.03	0.02	4.83	140	0.452	93.6	29	310
xxxxxxx	22994	xxx	Han	woman	67	155	61	25.3902	5.28	7.65	4.33	4.33	1.24	2.73	97	3.9	64	386.2	119	75	1.43	0.69	1	retire	xxxxxxxxxxx	2021-02-25	Heart center	22	xxxxxx	88		61	6	54.4	39.3	4.8	1.3	0.2	3.26	2.36	0.29	0.08	0.01	4.37	130	0.393	89.9	29.7	331
xxxxxxx	23002	xxx	Han	man	63	159	70	27.6888	5.29	4.9	2.59	4.69	0.97	3.02	110.88										xxxxxxxxxxx	2021-02-25	Heart center	23	xxxxxx
xxxxxxx	28920	xxx	Han	man	47	155	65	27.0552	7.39	7.72	2.8	5.49	0.84	4.41	234.49	5.9	67	216.2	168	105	0.89	1.27	2		xxxxxxxxxxx	2021-02-25	Heart center	14	xxxxxx	92	-	88	11.02	70.3	19.3	9.4	0.6	0.4	7.75	2.13	1.04	0.07	0.04	5.08	150	0.46	89.6	29.5	330
xxxxxxx	22999	xxx	Han	man	63	160	79	30.8594	4.72	5.75	1.34	5.94	1.63	4.25	178.22	6.3	64	295	114	81	1.39	1.23	1		xxxxxxxxxxx	2021-02-26	Heart center	27	xxxxxx	90		73	4	48.9	39.8	6.5	4.3	0.5	1.96	1.59	0.26	0.17	0.02	4.34	149	0.436	100.5	34.3	342
xxxxxxx	28909	xxx	Han	man	50	179	93	29.0253	5.97	4.95	1.67	4.45	0.97	3.17	112.69	3.7	96.4	468	120	80	1.41	1.02	5		xxxxxxxxxxx	2021-02-26	Heart center	33	xxxxxx	99		77	8.01	58.7	30.2	8.7	1.9	0.5	4.7	2.42	0.7	0.15	0.04	5.31	162	0.49	91.9	30.5	332
xxxxxxx	23036	xxx	Han	man	62	168	86	30.4705	4.43	5.36	1.23	2.44	1.17	1.44	196.88	5.4	97	329.1	120	80	1.26	0.47	5	office worker	xxxxxxxxxxx	2021-02-28	Heart center	50	xxxxxx	102		78	6.4	68.8	23.6	5.3	2	0.3	4.4	1.51	0.34	0.13	0.02	4.03	132	0.379	94	32.8	348
xxxxxxx	28938	xxx	Han	man	51	155	59	24.5578	7.95	7.5	4.81	5.13	0.83	3.81	859.56	5	60	295.8	180	110	1.13	0.82	1		xxxxxxxxxxx	2021-02-28	Heart center	51	xxxxxx	98		75	11.21	82.3	13	4.5	0.1	0.1	9.23	1.46	0.5	0.01	0.01	4.21	129	0.37	87.2	30.6	351
xxxxxxx	23063	xxx	Uygur	man	75	175	79	25.7959	4.88	5.22	0.89	3.08	1.32	1.67	115.16	4	64	180	170	90	1.1	0.57	1	farmer	xxxxxxxxxxx	2021-03-01	Heart center	24	xxxxxx	102		58	6.28	68.4	24.8	4.1	2.5	0.2	4.3	1.56	0.26	0.16	0.01	4.53	138	0.409	90.3	30.5	337
xxxxxxx	28952	xxx	Han	man	57	170	63	21.7993	4.42	5.04	0.85	3.52	1.06	2.62	371.86	5.6	70	252.4			1.28	0.74	2		xxxxxxxxxxx	2021-03-01	Heart center	31	xxxxxx	78		80	4.28	51	36.9	8.6	3	0.5	2.18	1.58	0.37	0.13	0.02	4.37	137	0.42	96.8	31.4	324
xxxxxxx	28941	xxx	Han	man	80	158	68	27.2392	6.22	5.46	1.34	4.53	1.25	3.23	285.51	7.9	109	412.3	114	68	1.12	0.95	1	retire	xxxxxxxxxxx	2021-03-01	Heart center	46	xxxxxx	82		60	5.51	65.5	26.1	6	2.2	0.2	3.61	1.44	0.33	0.12	0.01	3.78	124	0.389	102.9	32.8	319
xxxxxxx	28947	xxx	Han	man	82	168	71	25.1559	5.12	5.28	1.32	4.43	0.98	2.95	212	6.1	80.27	347.38	160	90	1.22	0.91	5	retire	xxxxxxxxxxx	2021-03-01	Heart center	24	xxxxxx	80		63	7.26	59.2	31	2.9	3.6	0.3	4.3	2.25	0.43	0.26	0.02	4.76	146	0.45	94.5	30.7	324
xxxxxxx	23037	xxx	Uygur	man	55	165	75	27.5482	7.8	7.33	2.4	3.43	0.73	2.41	71.31	4.94	81.87	3.2	160	100	0.94	0.67	2	retire	xxxxxxxxxxx	2021-03-01	Heart center	37	xxxxxx	102		71	6.1	69.5	20.3	7.1	2.7	0.4	4.24	1.24	0.43	0.16	0.02	4.84	142	0.434	89.5	29.3	327
xxxxxxx	28946	xxx	Uygur	man	52	165	79	29.0174	6.04	7.63	1.32	5.16	1.23	3.96	339.35	5.4	87	288.9	107	51	1.15	1.1	5	security guard	xxxxxxxxxxx	2021-03-01	Heart center	44	xxxxxx	94		57	10.64	48.2	38.4	8.4	3.9	1.1	5.13	4.09	0.89	0.41	0.12	4.81	142	0.43	89.6	29.5	329
xxxxxxx	28944	xxx	Han	man	78	170	80	27.6817	6.35	8.22	1.3	5.35	0.88	3.79	297	5.57	83.54	324.44	190	100	1.11	1.09	2	farmer	xxxxxxxxxxx	2021-03-02	Heart center	15	xxxxxx	96		94	6.35	63.7	29.4	5.8	0.9	0.2	4.04	1.87	0.37	0.06	0.01	4.69	129	0.413	88.1	27.5	312
xxxxxxx	23052	xxx	Han	man	54	169	70	24.5089	4.73	5.51	1.98	4.25	0.69	3.07	213.41	4.8	60	317	120	80	0.76	0.96	5	security guard	xxxxxxxxxxx	2021-03-02	Heart center	4	xxxxxx	88		84	4	46.8	43.3	7.3	2.3	0.3	4.45	1.73	0.29	0.09	0.01	4.45	138	0.395	88.8	31	349
xxxxxxx	28925	xxx	Uygur	man	51	172	87	29.4078	5.34	7.91	1.78	4.21	0.92	2.46	84	6.23	85.94	310	158	90	1.15	0.7	6	civil servant	xxxxxxxxxxx	2021-03-02	Heart center	38	xxxxxx	102	-	709	9.66	53.2	31.1	6.1	9	0.6	5.14	3	0.59	0.87	0.06	5.48	155	0.459	83.8	28.3	338
xxxxxxx	23087	xxx	Uygur	woman	70	162	54	20.5761	5.31	5.58	3.04	4.27	1.23	2.4	71.67	5.3	44	256			1.34	0.85		retire	xxxxxxxxxxx	2021-03-02	Heart center	42	xxxxxx	68		64	8.34	59	34.21	5	0.8	0.4	4.97	2.85	0.42	0.07	0.03	5.25	155	0.464	88.4	29.5	334
xxxxxxx	23096	xxx	Han	woman	52	166	60	21.7738	5.45	5.68	1.37	4.67	1.27	3.18	232.52	3.4	47	228			1.2	0.87	2	office worker	xxxxxxxxxxx	2021-03-02	Heart center		xxxxxx	68		72	5.067	49	43.6	5.66	1.6	0.2	2.78	2.47	0.32	0.09	0.01	4.78	144	0.434	90.8	30.1	332
xxxxxxx	28905	xxx	Han	man	58	170	73	25.2595	5.36	6.77	7.63	3.25	0.79	1.84	316.3	6.1	69	331.2	180	100	1.11	0.27	6	civil servant	xxxxxxxxxxx	2021-03-02	Heart center	24	xxxxxx	81		72	3.81	39.2	49.6	7.3	3.1	0.8	1.49	1.89	0.28	0.12	0.03	4.47	133	0.4	88.8	29.8	335
xxxxxxx	23137	xxx	Han	man	72	177	74	23.6203	8.79	6.96	1.63	3.68	0.91	2.53	113.81	8.96	82.38	371.35			1.1	0.64	1	farmer	xxxxxxxxxxx	2021-03-02	Heart center	43	xxxxxx	78		68	10.06	77.6	14.1	7	1.1	0.2	7.81	1.42	0.7	0.11	0.02	5.28	156	0.475	90	29.5	328
xxxxxxx	28955	xxx	Han	man	71	181	102	31.1346	4.98	5.59	1.13	3.2	1.13	2.18	373.5	7.6	138	495.3	148	74	1.05	0.64	3	retire	xxxxxxxxxxx	2021-03-02	Heart center	31	xxxxxx	107		54	6.9	54.4	36.2	5.7	3.6	0.1	3.75	2.5	0.39	0.25	0.01	3.81	129	0.392	102.9	33.9	329
xxxxxxx	28907	xxx	Han	man	51	172	72	24.3375	4.5	5.31	0.94	2.97	0.95	2.15	404.01	5.3	85	358.1			0.92	0.63	3		xxxxxxxxxxx	2021-03-02	Heart center	13	xxxxxx	78		72	5.02	64.3	28.1	5.2	2.2	0.2	3.23	1.41	0.26	0.11	0.01	4.69	145	0.434	92.5	30.9	334
xxxxxxx	23111	xxx	Uygur	woman	49	167	56	20.0796	4.95	5.36	0.45	3.65	1.45	2.07	119.11	3.3	57	253			1.2	0.62	5	civil servant	xxxxxxxxxxx	2021-03-03	Heart center	46	xxxxxx	70		62	8.38	59.8	31.5	6	2.3	0.4	5.01	2.64	0.5	0.19	0.03	4.13	122	0.373	90.3	29.5	327
xxxxxxx	28914	xxx	Uygur	man	68	170	90	31.1419	5	5.75	4.93	4.68	0.72	1.94	91	5.07	79.16	406.65			1.59	0.78	1	retire	xxxxxxxxxxx	2021-03-03	Heart center	26	xxxxxx	104		80	5.92	51.5	38.5	5.2	4.1	0.7	3.05	2.28	0.31	0.24	0.04	4.52	131	0.41	90.7	29	320
xxxxxxx	23113	xxx	Uygur	man	45	178	79	24.9337	3.64	5.62	1.62	4.68	1.7	3.21	179.23	5.4	108	323.7			1.57	0.94	3	farmer	xxxxxxxxxxx	2021-03-03	Heart center	41	xxxxxx	82		61	7.16	48.5	39.5	8.5	3.1	0.4	3.47	2.83	0.61	0.22	0.03	5.57	165	0.489	87.8	29.6	337
xxxxxxx	28923	xxx	Uygur	man	49	179	76	23.7196	4.01	5.37	2.43	3.9	0.87	2.28	124	5	68.07	262.68	105	79	1.71	0.73	4	civil servant	xxxxxxxxxxx	2021-03-03	Heart center	22	xxxxxx	98		78	8.9	53.7	36.2	6.1	3.4	0.6	4.78	3.22	0.54	0.3	0.05	4.7	146	0.482	102.6	31.1	303
xxxxxxx	28943	xxx	Han	man	56	169	74	25.9095	4.74	4.97	0.8	2.57	0.79	1.44	141	4.97	63.49	379.54	160	110	1.4	0.49	5	retire	xxxxxxxxxxx	2021-03-03	Heart center	48	xxxxxx	78		58	5.27	61.7	30.4	6.6	1.1	0.2	3.25	1.6	0.35	0.06	0.01	3.95	130	0.377	95.4	32.9	345
xxxxxxx	23069	xxx	Han	woman	55	162	58	22.1003	8.8	8.77	0.71	4.22	2.08	1.92	126.76	4.6	51.37	179			1.91	0.65	5	retire	xxxxxxxxxxx	2021-03-03	Heart center	31	xxxxxx	69		62	5.25	56.2	36	5.3	1.9	0.6	2.95	1.89	0.29	0.1	0.03	4.22	135	0.408	95.7	32	331
xxxxxxx	23084	xxx	Han	woman	74	164	56	20.8209	4.73	5.8	0.88	4.68	1.593	3.33	148.49	6.4	73	277.5			1.36	1.04	2	retire	xxxxxxxxxxx	2021-03-03	Heart center	41	xxxxxx	60		100	6.77	61.2	30.4	7.1	1	0.3	4.14	2.06	0.48	0.07	0.02	4.01	132	0.395	98.5	32.9	334
xxxxxxx	28915	xxx	Han	man	64	170	73	25.2595	5.14	5.57	1.78	5.95	1.37	4.51	575.31	5.5	126	369.3			1.28	1.13	3	retire	xxxxxxxxxxx	2021-03-03	Heart center	28	xxxxxx	75		64	5.61	43	53.1	1.2	2.7	0	2.41	2.98	0.07	0.15	0	4.49	144	0.424	94.4	32.1	340
xxxxxxx	28911	xxx	Uygur	man	60	170	80	27.6817	4.52	5.24	0.95	2.66	0.95	1.73	237.2	6.8	112	386.6	210	140	0.92	0.55	0	farmer	xxxxxxxxxxx	2021-03-03	Heart center	26	xxxxxx	93		71	7.49	57.2	33.6	7.5	1.7	0	4.28	2.52	0.56	0.13	0	4.55	140	0.423	93	30.8	331
xxxxxxx	23156	xxx	Uygur	man	45	176	101	32.6059	7.68	8.44	2.3	5.19	0.69	1.16	234.47	3.7	61	365			0.86	0.68	3	farmer	xxxxxxxxxxx	2021-03-04	Heart center	41	xxxxxx	104		76	6.09	51.9	42.4	3.8	1.6	0.3	3.16	2.58	0.23	0.1	0.02	4.69	144	0.413	88.1	30.7	349
xxxxxxx	23070	xxx	Han	woman	55	160	59	23.0469	7.49	8.4	1.02	7.59	2.33	5.62	214.12	3.6	71	191			1.75	0.46	3	retire	xxxxxxxxxxx	2021-03-04	Heart center		xxxxxx	78		73	6.48	56	37.8	4	1.7	0.5	3.63	2.45	0.26	0.11	0.03	4.51	132	0.388	86	29.33	40
xxxxxxx	23114	xxx	Han	man	57	178	89	28.0899	5.8	5.91	1.96	7.87	1.01	5.92	87.01	8	107	500			1.04	1.78	3	not in detail	xxxxxxxxxxx	2021-03-04	Heart center	15	xxxxxx	92		80	8.91	62.1	28.3	6.4	2.4	0.8	5.53	2.52	0.75	0.21	0.07	5.48	167	0.49	89.4	30.5	341
xxxxxxx	23249	xxx	Han	man	71	172	84	28.3937	8.38	7.51	0.65	7.06	1.48	4.83	94.5	8.38	57.09	281.48			1.5	1.22	1	farmer	xxxxxxxxxxx	2021-03-05	Heart center	3	xxxxxx	92		83	11.75	92.8	6.4	0.5	0	0.3	10.9	0.75	0.06	0	0.04	5.23	155	0.465	0.06	29.6	333
xxxxxxx	28972	xxx	Uygur	man	38	167	68	24.3824	4.73	5.31	1.91	3.31	0.88	2.33	260.24	5.9	86	290.8	122	78	0.93	0.7	5	civil servant	xxxxxxxxxxx	2021-03-06	Heart center	33	xxxxxx	82	-	81	6.58	43.7	48.5	5.5	2	0.3	2.88	3.19	0.36	0.13	0.02	5.53	167	0.499	90.2	30.2	335
xxxxxxx	23142	xxx	Han	man	58	177	87	27.7698	5.22	5.66	2.34	4.93	0.84	3.3	20.17	3.1	65	361			1.14	1.13	6	civil servant	xxxxxxxxxxx	2021-03-06	Heart center	36	xxxxxx	94		72	5.88	47	38.9	9.7	3.7	0.7	2.76	2.29	0.57	0.26	0.04	4.21	134	0.363	86.2	31.8	369
xxxxxxx	23139	xxx	Uygur	man	52	177	110	35.1112	5.07	5.64	1.39	3.81	1.09	2.49	272.62	6.1	58	274			1.17	0.83	2	farmer	xxxxxxxxxxx	2021-03-07	Heart center	33	xxxxxx	123		79	5.21	42.2	48.2	6.9	2.5	0.2	2.2	2.51	0.36	0.13	0.01	4.74	144	0.44	92.8	30.4	327
xxxxxxx	23144	xxx	Uygur	man	49	174	75	24.7721	5.42	5.5	1.17	5.3	1.12	3.99	174.25	5.4	73	281			1.17	1.25	4	civil servant	xxxxxxxxxxx	2021-03-07	Heart center	29	xxxxxx	79		89	8.16	52.2	36.3	7.2	3.8	0.5	4.26	2.96	0.59	0.31	0.04	5.03	148	0.44	87.5	29.4	336
xxxxxxx	23206	xxx	Uygur	woman	57	158	66	26.4381	4.64	5.51	1.95	4.66	1.65	3.26	146.35	6.1	79	337.9			1.52	1.04	6	office worker	xxxxxxxxxxx	2021-03-07	Heart center	3	xxxxxx	73		46	6.64	55.6	34	6.5	3.6	0.3	3.69	2.26	0.43	0.24	0.02	4.53	141	0.435	96	31.1	324
xxxxxxx	23205	xxx	Uygur	man	75	182	90	27.1706	4.67	5.53	1.22	3.9	0.88	2.97	119.72	7.5	100	260.4			0.88	0.98	1	farmer	xxxxxxxxxxx	2021-03-07	Heart center	25	xxxxxx	101		80	5.4	60.5	29.1	7.8	2.4	0.2	3.27	1.57	0.42	0.13	0.01	4.7	143	0.419	89.1	30.4	341
xxxxxxx	23207	xxx	Han	woman	61	161	68	26.2336	8.63	8.14	1.26	2.65	1.01	1.83	112.34	4.2	83	314.2			1.09	0.62	3	farmer	xxxxxxxxxxx	2021-03-07	Heart center	31	xxxxxx	70		96	6.4	62.4	32	4.5	0.9	0.2	3.99	2.05	0.29	0.06	0.01	4.48	136	0.4	89.3	30.4	340
xxxxxxx	29041	xxx	Han	man	55	175	76	24.8163	4.92	5.5	1.48	3	1.26	1.31	165	6.38	60.36	334.78	128	76	1.75	0.51	6	civil servant	xxxxxxxxxxx	2021-03-07	Heart center	32	xxxxxx	98	-	78	5.41	45.4	42.3	6.7	5	0.6	2.46	2.29	0.36	0.27	0.03	4.41	133	0.416	94.3	30.2	320
xxxxxxx	23226	xxx	Uygur	man	71	172	84	28.3937	4.47	5.6	0.72	3.29	1.02	2.24	107.24	5.3	62	282			0.92	0.78	3	retire	xxxxxxxxxxx	2021-03-08	Heart center	26	xxxxxx	98		80	7.99	73.1	15.1	9.3	2.4	0.1	5.84	1.21	0.74	0.19	0.01	5.21	156	0.468	89.8	29.9	333
xxxxxxx	23232	xxx	Han	woman	60	161	68	26.2336	7.57	7.61	0.7	5.23	2	3.98	134	6.9	75	250.1			1.64	1	2	retire	xxxxxxxxxxx	2021-03-09	Heart center	23	xxxxxx	79		64	6.73	83	15.5	1.3	0.1	0.1	5.59	1.04	0.09	0.01	0.01	3.81	124	0.3688	96.6	32.5	337
xxxxxxx	23210	xxx	Han	man	45	171	80	27.3588	5.02	5.29	1.28	4.8	1.56	3.26	65.14	3.4	61	198			1.5	1.08			xxxxxxxxxxx	2021-03-09	Heart center	40	xxxxxx	88		84	8.72	51.2	38.9	8.1	1.3	0.5	4.46	3.39	0.71	0.11	0.04	5.07	151	0.458	90.3	29.8	330
xxxxxxx	23219	xxx	Han	man	52	172	80	27.0416	7.35	7.68	2.12	3.92	0.67	2.64	209.5	6.21	105.62	494			0.86	0.98	5	retire	xxxxxxxxxxx	2021-03-09	Heart center	41	xxxxxx	88		99	6.94	59.8	28.2	8.8	2.3	0.9	4.15	1.96	0.61	0.16	0.06	4.47	109	0.355	79.4	24.4	307
xxxxxxx	23220	xxx	Uygur	woman	54	160	68	26.5625	4.67	5.61	1.96	5.1	1.38	3.29	110	4.18	56.18	196.72			1.56	0.81			xxxxxxxxxxx	2021-03-10	Heart center	49	xxxxxx	77		61	6.53	37.5	54.5	6.4	1.4	0.2	2.45	3.56	0.42	0.09	0.01	4.33	126	0.378	87.3	29.1	333
xxxxxxx	23148	xxx	Uygur	woman	57	162	70	26.6728	4.92	5.35	2.83	4.78	0.71	3.5	63.61	3.52	47.52	264.38			1.18	1.31	5	retire	xxxxxxxxxxx	2021-03-10	Heart center	13	xxxxxx	80		88	5.81	53.7	36.7	7.2	2.1	0.3	3.12	2.13	0.42	0.12	0.02	4.63	137	0.408	88.1	29.6	336
xxxxxxx	23225	xxx	Han	woman	67	163	72	27.0993	3.99	5.5	1.6	4.37	0.98	2.92	119	8.45	96.52	398.72			1.13	0.74	0	retire	xxxxxxxxxxx	2021-03-10	Heart center	6	xxxxxx	80		75	5.8	67.8	21.6	8.4	1.7	0.5	3.93	1.25	0.49	0.1	0.03	4.48	136	0.414	92.4	30.4	329
xxxxxxx	23213	xxx	Han	woman	49	161	72	27.7767	6.26	5.68	0.99	3.75	1.5	2.59	698.7	3.9	67	208.3			1.4	0.85	3	office worker	xxxxxxxxxxx	2021-03-10	Heart center	54	xxxxxx	80		72	10.68	69	21.3	6.8	2.1	0.8	7.37	2.27	0.73	0.22	0.09	4.55	101	0.325	73.6	22.2	301
xxxxxxx	23241	xxx	Han	woman	66	162	69	26.2917	4.73	5.59	1.53	3.2	1.28	2.11	200.9	5.1	62	280.4			1.34	0.66	2	retire	xxxxxxxxxxx	2021-03-10	Heart center	10	xxxxxx	73		64	5.21	46	45.7	6	2.1	0.2	2.4	2.38	0.31	0.11	0.01	4.05	125	0.38	94.1	30.9	328
xxxxxxx	23244	xxx	Han	man	49	172	84	28.3937	4.89	6.01	6.07	3.93	0.58	1.01	78	6.54	105.035	51.57			0.96	0.53	6	technician	xxxxxxxxxxx	2021-03-10	Heart center	8	xxxxxx	88		82	5.39	55.5	38	5.4	0.4	0.7	2.99	2.05	0.29	0.07	0.04	4.81	149	0.444	92.3	31	336
xxxxxxx	23259	xxx	Han	man	75	172	82	27.7177	4.49	5.69	2.3	4.19	1.02	2.32	85	4.63	109.7	265.45			1.33	0.64	5	retire	xxxxxxxxxxx	2021-03-10	Heart center	12	xxxxxx	87		75	6.32	61.9	26.4	9.2	1.9	0.6	3.91	1.67	0.58	0.12	0.04	4.86	147	0.459	94.4	30.2	320
xxxxxxx	23149	xxx	Han	man	55	177	84	26.8122	5.16	4.95	2.86	4.65	0.99	2.73	89	4.33	60.2	541.74			1.31	0.76	2	security guard	xxxxxxxxxxx	2021-03-10	Heart center	17	xxxxxx	88		89	6.72	47.6	41.4	8	2.7	0.3	3.2	2.78	0.54	0.18	0.02	4.5	147	0.434	96.4	32.7	339
xxxxxxx	23248	xxx	Han	man	60	174	84	27.7447	4.82	5.08	1.07	4.47	1.61	2.88	161.43	6.9	82	341.7			1.49	0.96	2	farmer	xxxxxxxxxxx	2021-03-10	Heart center	18	xxxxxx	93		61	4.97	52.8	36.4	5.6	5	0.2	2.62	1.81	0.28	0.208	0.01	4.75	144	0.433	91.2	30.3	333
xxxxxxx	23234	xxx	Han	man	60	171	83	28.3848	7.26	7.96	4.71	3.05	1	1.94	259.76	4.7	86	229.8			1.22	0.52	2	retire	xxxxxxxxxxx	2021-03-10	Heart center	4	xxxxxx	93		80	3.23	50.8	43	5	1.2	0	1.64	1.39	0.16	0.04	0	4.28	137	0.405	44.6	32	338
xxxxxxx	23221	xxx	Han	man	48	172	80.8	27.3121	5.14	8	1.21	2.31	0.84	1.52	134.41	5.4	98	405			1.02	0.5	5	staff	xxxxxxxxxxx	2021-03-10	Heart center	25	xxxxxx	8		88	7	59.4	32.3	6.2	1.5	0.6	4.16	2.26	0.43	0.1	0.04	4.94	139	0.412	83.6	28.1	336
xxxxxxx	23282	xxx	Uygur	man	56	175	88	28.7347	17.33	8.87	1.41	5.55	1.16	3.96	933.62	5.15	54.84	202.15			1.19	1.05	2	retire	xxxxxxxxxxx	2021-03-11	Heart center	40	xxxxxx	92		97	8.29	55.4	35.2	8.1	0.6	0.7	4.54	2.92	0.67	0.005	0.06	5.56	152	0.457	82.2	27.3	333
xxxxxxx	23222	xxx	Han	woman	63	181	94	28.6927	6.03	5.45	2.73	4.67	0.96	3.22	114	4.77	54.08	349.05			1.22	0.96	2	retire	xxxxxxxxxxx	2021-03-11	Heart center	46	xxxxxx	103		70	7.72	56.9	34.1	4.8	3.6	0.6	4.39	2.63	0.37	0.28	0.05	4.64	139	0.438	94.4	30	317
xxxxxxx	23346	xxx	Han	woman	82	155	68	28.3039	13.89	8.03		4.44	1.42	2.73	83.52	7.29	75.86	227.59	180	100	1.59	0.6	3	retire	xxxxxxxxxxx	2021-03-11	Heart center	21	xxxxxx	78		94	6.26	66.9	20.8	9.6	1.6	1.1	4.19	1.3	0.6	0.1	0.07	3.82	114	0.34	89	29.8	335
xxxxxxx	23304	xxx	Han	man	44	168	60	21.2585	6.31	8.1	1.86	3.35	0.74	2.63	140.18	3.3	75	265.2			0.74	1.02	3		xxxxxxxxxxx	2021-03-12	Heart center	12	xxxxxx	71	a	64	9.54	69.4	22.3	6.8	1.4	0.1	6.62	2.13	0.65	0.13	0.01	4.75	140	0.417	87.8	29.5	336
xxxxxxx	23283	xxx	Uygur	woman	70	175	82	26.7755	4.67	5.5	1.16	3.84	1.91	2.48	121.92	4.2	82	268			1.57	0.72	3	retire	xxxxxxxxxxx	2021-03-12	Heart center	15	xxxxxx	58		57	5.9	47.3	45.1	4.9	2.5	0.2	2.79	2.66	0.29	0.15	0.01	4.16	122	0.371	89.2	29.3	329
xxxxxxx	23319	xxx	Han	man	57	179	88	27.4648	4.52	8.08	0.74	2.66	0.97	1.45	80.3	3.5	79	313			0.99	0.43	5	office worker	xxxxxxxxxxx	2021-03-13	Heart center	28	xxxxxx	78	b	70	5.27	49.8	32.8	7.8	8.7	0.9	2.62	1.73	0.41	0.46	0.05	4.63	147	0.426	92	31.7	345
xxxxxxx	23292	xxx	Han	man	57	175	82	26.7755	4.27	5.43	2.3	3.1	1.09	1.57	97.51	4.5	67	367			1.21	0.54	3	retire	xxxxxxxxxxx	2021-03-14	Heart center	22	xxxxxx	88		76	7.59	66.9	22.3	6.9	3.6	0.3	5.08	1.69	0.52	0.27	0.02	4.58	147	0.424	92.6	32.1	347
xxxxxxx	29158	xxx	Han	man	51	172	65	21.9713	8.18	6.84	1.65	3.97	0.74	2.4	93.31	4.34	57.38	217	170	94	2.12	0.87	2		xxxxxxxxxxx	2021-03-14	Heart center	35	xxxxxx	75		63	8.39	61.2	25.3	9.2	4.2	0.1	5.13	2.12	0.77	0.35	0.01	4.55	141	0.427	93.8	31	330
xxxxxxx	23295	xxx	Han	man	68	175	88	28.7347	4.69	5.45	0.85	4.01	1.21	2.67	347.49	6.4	81	339		120	0.99	0.88	0		xxxxxxxxxxx	2021-03-14	Heart center	14	xxxxxx	93		60	10	58.1	30.2	4.8	6.6	0.3	5.81	3.02	0.48	0.66	0.03	4.66	147	0.449	96.4	31.5	327
xxxxxxx	23288	xxx	Han	man	62	180	93	28.7037	4.16	8.99	1.37	3.29	0.79	3.05	308.9	4.3	66	369			1	0.74	5	security guard	xxxxxxxxxxx	2021-03-14	Heart center	36	xxxxxx	98		75	4.81	49.9	42	5	2.5	0.6	2.4	2.02	0.24	0.12	0.03	5.14	151	0.443	86.2	29.4	341
xxxxxxx	23266	xxx	Han	man	48	180	89	27.4691	5.27	5.44	3.28	5.57	1.67	4.01	130.21	6.4	93	259.9			1.21	0.75	6	worker	xxxxxxxxxxx	2021-03-14	Heart center	35	xxxxxx	95		72	5.71	48.4	42.6	7	1.6	0.4	2.76	2.43	0.4	0.09	0.02	4.67	151	0.445	95.3	32.3	339
xxxxxxx	23270	xxx	Han	man	64	172	82	27.7177	7.35	8.16	1.98	3.341	0.13	2.26	134.14	5.1	81	280.9			1.21	0.76	2	retire	xxxxxxxxxxx	2021-03-14	Heart center	39	xxxxxx	88		74	4.94	54.9	38.7	3.8	2.4	0.2	2.71	1.91	0.19	0.12	0.01	4.62	135	0.39	84.4	29.2	346
xxxxxxx	29189	xxx	Uygur	man	78	170	80	27.6817	9.76	8.1	1.87	4.54	1.11	3.28	279.48	7.31	81.18	317.19	130	80	1.1	0.97		retire	xxxxxxxxxxx	2021-03-14	Heart center	26	xxxxxx	75		70	10.6	58.6	29.9	9.1	1.7	0.7	6.21	3.17	0.96	0.18	0.07	4.76	138	0.43	91	29	319
xxxxxxx	23329	xxx	Han	man	49	170	84	29.0657	6.38	5.91	2.13	2.52	0.74	1.26	189.59	6	80	252	124	57	1.02	0.54	7		xxxxxxxxxxx	2021-03-15	Heart center	3	xxxxxx	87	ab	60	6.08	57.3	34.2	5.4	2.6	0.5	3.48	2.08	0.33	0.16	0.03	4.79	149	0.422	88.1	31.1	353
xxxxxxx	23287	xxx	Uygur	man	68	172	83	28.0557	4.3	5.26	1.82	3.4	0.92	2.05	115.2	5.7	61	396			1.11	0.67	3		xxxxxxxxxxx	2021-03-15	Heart center	57	xxxxxx	96		72	6.33	62.9	25.1	8.8	3	0.2	3.98	1.59	0.56	0.19	0.01	6.36	194	0.564	88.7	30.5	344
xxxxxxx	29155	xxx	Han	man	65	165	69	25.3444	4.89	5.38	1.26	2.06	0.77	1.28	230.57	4.3	88	372.2			0.89	0.42	3	civil servant	xxxxxxxxxxx	2021-03-15	Heart center	19	xxxxxx	71		94	6.59	56.9	33.5	7.6	1.5	0.5	3.75	2.21	0.5	0.1	0.03	4.94	153	0.448	90.7	31	342
xxxxxxx	29177	xxx	Han	man	59	169	72	25.2092	5.45	5.89	2.1	4.46	1.08	3.01	164.7	4.4	106	258			1.37	1	3	farmer	xxxxxxxxxxx	2021-03-15	Heart center	21	xxxxxx	78		67	6.91	45.5	46.7	6.2	0.9	0.7	3.14	3.23	0.43	0.06	0.05	4.67	135	0.41	88.2	28.9	328
xxxxxxx	29154	xxx	Han	man	48	176	81	26.1493	4.86	5.49	2.67	4.3	1.12	3.09	589.76	5.9	76	278.8	188	88	1.01	0.96	5	office worker	xxxxxxxxxxx	2021-03-15	Heart center	16	xxxxxx	85		88	7.2	59.6	33.3	4.7	2.1	0.3	4.29	2.4	0.34	0.15	0.02	4.94	153	0.404	93.9	31	330
xxxxxxx	23321	xxx	Han	man	70	168	83	29.4076	4.77	5.84	1.66	5.38	0.93	3.99	55.97	4.3	66	320	190	90	1	1.2	2	retire	xxxxxxxxxxx	2021-03-15	Heart center	1	xxxxxx	85		94	7.64	55.4	31.8	8.1	3.7	1	4.23	2.43	0.62	0.28	0.08	5.48	155	0.477	87	28.3	325
xxxxxxx	23302	xxx	Han	man	67	175	80	26.1224	4.63	5.76	1.8	6.61	1.14	4.93	92.78	7	85	446			1.21	1.45	2		xxxxxxxxxxx	2021-03-15	Heart center	20	xxxxxx	82		72	4.14	57.7	31.4	7.5	2.9	0.5	2.39	1.3	0.31	0.12	0.02	4.916	166	0.489	98.2	33.3	339
xxxxxxx	23374	xxx	Han	man	64	160	67	26.1719	5.85	8.25	0.82	3.37	0.83	2.13	218.15	2.9	4.5	148	150	80	1.06	0.81	2	retire	xxxxxxxxxxx	2021-03-15	Heart center	39	xxxxxx	73	b	84	4.73	70.2	18	9.7	1.3	0.8	3.32	0.85	0.46	0.06	0.04	3.72	110	0.343	92.2	29.6	321
xxxxxxx	23347	xxx	Han	man	78	166	67	24.3141	4.85	5.7	0.8	3.44	1.04	2.04	420.07	5.4	75	231	100	60	1.02	0.73	2	retire	xxxxxxxxxxx	2021-03-15	Heart center	38	xxxxxx	73	a	70	8.34	58.2	19.7	10.3	1.16	0.2	4.85	1.64	0.86	0.97	0.02	3.63	121	0.342	94.2	33.3	354
xxxxxxx	23343	xxx	Uygur	man	65	165	75	27.5482	4.71	5.7	0.71	2.51	0.92	1.44	100.01	6.5	78	254	180	130	0.96	0.5	1	retire	xxxxxxxxxxx	2021-03-15	Heart center	26	xxxxxx	80	b	84	5.39	64.8	23.7	8.5	2.8	0.2	3.49	1.28	0.46	0.15	0.01	4.61	136	0.413	89.6	29.5	329
xxxxxxx	29218	xxx	Uygur	man	61	168	67	23.7387	5.91	4.88	0.9	2.6	0.76	1.62	304.3	6.17	99.91	369	138	77	0.85	0.57	3	teacher	xxxxxxxxxxx	2021-03-16	Heart center	18	xxxxxx	73		67	6.15	65.1	24.9	6.7	2.8	0.5	4	1.53	0.41	0.17	0.03	5.99	177	0.54	90	29.5	328
xxxxxxx	29157	xxx	Uygur	man	57	172	93	31.4359	5.11	5.67	3.29	3.51	0.87	2.22	172.67	4.4	105	444	191	133	1	0.75	1	farmer	xxxxxxxxxxx	2021-03-16	Heart center	34	xxxxxx			84	6.74	61.3	28.3	7	3.3	0.1	4.13	1.91	0.47	0.22	0.01	5.64	179	0.513	91	31.7	349
xxxxxxx	23333	xxx	Uygur	man	46	178	89	28.0899	4.81	5.3	2.16	4.87	0.69	3.59	75.87	6	69	339	115	87	0.86	1.19	6	teacher	xxxxxxxxxxx	2021-03-16	Heart center	3	xxxxxx	89	b	86	6.72	51.2	33.9	9.1	5.5	0.3	3.44	2.28	0.61	0.37	0.02	4.49	150	0.436	97.1	33.4	344
xxxxxxx	29190	xxx	Han	man	58	177	70	22.3435	4.3	5.44	0.62	3.8	1.66	2.51	99.71	4.9	80	305			1.43	0.76	3	office worker	xxxxxxxxxxx	2021-03-16	Heart center	24	xxxxxx	78		78	6.23	63.6	29.7	5.6	0.8	0.3	3.96	1.85	0.35	0.05	0.02	4.49	139	0.42	93.5	31	331
xxxxxxx	29221	xxx	Han	man	77	185	102	29.8028	8.53	8.44	1.49	3.88	0.62	2.35	312.15	6.3	126.69	499	145	90	0.87	0.73	0	retire	xxxxxxxxxxx	2021-03-16	Heart center	31	xxxxxx	96		98	10.19	79.4	14.7	5.1	0.5	0.3	8.09	1.5	0.52	0.05	0.03	5.28	151	0.45	86	28.6	333
xxxxxxx	29196	xxx	Han	man	41	177	85	27.1314	9.53	8.24	4.2	5.13	1.11	3.51	397.89	4.3	101	371.4	121	80	1.06	0.85	5	civil servant	xxxxxxxxxxx	2021-03-16	Heart center	51	xxxxxx	84		78	4.78	56.7	33.3	7.7	1.9	0.4	2.71	1.59	0.37	0.09	0.02	4.87	150	0.441	90.6	30.8	340
xxxxxxx	29193	xxx	Han	man	61	176	66	21.3068	4.18	5.32	1.4	2.92	0.86	1.9	162.29	4.2	71	286.1	134	80	1.17	0.61	3	civil servant	xxxxxxxxxxx	2021-03-16	Heart center	6	xxxxxx	77		74	5.8	61.7	26.5	10.8	0.7	0.3	3.58	1.54	0.03	0.04	0.02	4.29	136	0.459	107	31.7	296
xxxxxxx	23305	xxx	Han	man	48	174	78	25.763	4.99	5.79	1.72	5.47	0.94	4.07	501.22	5.7	82	390	160	80	1.06	1.23	5		xxxxxxxxxxx	2021-03-16	Heart center	50	xxxxxx	76	a	800	5.81	63	29.4	6.5	0.9	0.2	3.66	1.71	0.38	0.05	0.01	5.26	160	0.472	89.7	30.4	339
xxxxxxx	29194	xxx	Han	man	55	176	92	29.7004	5.44	5.87	4.32	6.8	1.52	4.4	324.85	4.2	96	254.2			1.53	1.4	4	office worker	xxxxxxxxxxx	2021-03-16	Heart center	44	xxxxxx	89		68	7.75	57.7	34.7	5.4	1.4	0.8	4.47	2.69	0.42	0.11	0.06	5.32	164	0.491	92.3	30.8	334
xxxxxxx	29220	xxx	Han	man	55	176	92	29.7004	5.44	5.87	4.32	6.8	1.52	4.4	324.85	4.2	96	254.2			1.53	1.4	4	office worker	xxxxxxxxxxx	2021-03-16	Heart center	44	xxxxxx	89		68	7.75	57.7	34.7	5.4	1.4	0.8	4.47	2.69	0.42	0.11	0.06	5.32	164	0.491	92.3	30.8	334
xxxxxxx	23312	xxx	Han	man	49	175	85	27.7551	4.72	5.98	2.93	3.32	1.18	1.46	93.6	5.8	66	371	170	100	1.41	0.59	6	civil servant	xxxxxxxxxxx	2021-03-16	Heart center	19	xxxxxx	82	b	75	8.39	55.3	34.1	7.7	2.7	0.2	4.64	2.86	0.65	0.23	0.02	5.52	169	0.495	89.7	30.6	341
xxxxxxx	23358	xxx	Han	man	69	167	64	22.9481	4.39	5.43	1.11	3.59	0.78	2.4	157.25	7	74	267			0.89	0.81	2	retire	xxxxxxxxxxx	2021-03-16	Heart center	37	xxxxxx	70	b	76	5.88	58.1	28.1	9.5	3.4	0.9	3.42	1.65	0.56	0.2	0.05	4.27	130	0.398	93.2	30.4	327
xxxxxxx	29175	xxx	Uygur	man	53	160	88	34.375	11.31	9.1	1.47	3.33	0.45	2.45	77	6.5	76	257			0.69	0.86	5	retire	xxxxxxxxxxx	2021-03-17	Heart center	23	xxxxxx	95		76	8.24	59.1	29.7	8	2.7	0.5	4.87	2.45	0.66	0.22	0.04	5.32	161	0.47	88.3	30.3	343
xxxxxxx	29230	xxx	Han	man	75	170	58	20.0692	5.26	4.82	0.79	3.1	1.15	1.61	266.94	6.33	53.19	229	137	68	1.32	0.62	1	retire	xxxxxxxxxxx	2021-03-17	Heart center	37	xxxxxx	72		81	5.03	53.1	31.8	11.9	2.8	0.4	2.67	1.6	0.6	0.14	0.02	3.29	103	0.33	98.8	31.3	317
xxxxxxx	29197	xxx	Han	man	54	172	91	30.7599	3.94	5.3	0.98	3.23	1.03	2.34	110.39	7.3	105	414.6			1.12	0.71	4	driver	xxxxxxxxxxx	2021-03-17	Heart center	52	xxxxxx	102		70	5.77	66.9	24.8	6.4	1.7	0.2	3.86	1.43	0.37	0.1	0.01	4.5	103	0.347	72.1	22.9	297
xxxxxxx	23342	xxx	Han	woman	53	158	63	25.2363	3.66	5.56	0.58	3.87	1.4	2.32	97.56	6.6	79	348	156	100	1.26	0.68	5	not in detail	xxxxxxxxxxx	2021-03-17	Heart center	31	xxxxxx	74	b	68	8.39	73.1	16.8	8	1.9	0.2	6.13	1.41	0.67	0.16	0.02	3.83	115	0.347	90.6	30	331
xxxxxxx	23341	xxx	Han	woman	77	156	69	28.3531	4.38	5.86	1.18	3.37	1.29	1.48	669.16	6.2	86	343	170	80	1.25	0.48	2	retire	xxxxxxxxxxx	2021-03-17	Heart center	45	xxxxxx	77	a	59	7.04	62.6	30.4	5.8	1.1	0.1	4.41	2.14	0.41	0.08	0.01	4.31	139	0.418	97	32.3	333
xxxxxxx	23350	xxx	Han	man	41	175	78	25.4694	4.72	5.62	0.87	4.04	1.14	2.57	509.54	5.2	86	322	143	95	1.13	0.75	4		xxxxxxxxxxx	2021-03-17	Heart center	18	xxxxxx	84	b	80	5.94	64.6	25.1	7.4	1.7	1.2	6.16	2.39	0.71	0.16	0.11	5.5	175	0.527	95.8	31.8	332
xxxxxxx	23334	xxx	Han	man	51	178	91	28.7211	7.86	8.02	4.08	6.09	1.07	4.23	119.14	6.58	87.12	218.698	155	68	1.17	0.55	5	civil servant	xxxxxxxxxxx	2021-03-17	Heart center	18	xxxxxx	90	A	92	12.06	90.9	4.9	3.8	0.1	0.3	10.96	0.59	0.46	0.01	0.04	4.89	146	0.442	90.4	29.9	330
xxxxxxx	23400	xxx	Han	man	47	174	88	29.0659	5.68	4.88	1.92	5.85	1.06	4.08	61.42	5.14	62.34	372.33	140	74	1.11	1.17	5	security guard	xxxxxxxxxxx	2021-03-17	Heart center	47	xxxxxx	92	a	61	8.2	54.9	28.4	9.1	6.7	0.9	4.5	2.33	0.75	0.55	0.07	4.31	140	0.427	99.1	32.5	328
xxxxxxx	23348	xxx	Han	man	57	165	55	20.202	8.29	7.78	1.22	2.65	0.96	1.78	304.63	3.7	88	255.6	104	77	0.96	0.57	5	office worker	xxxxxxxxxxx	2021-03-17	Heart center	38	xxxxxx	72	a	70	6.72	52.1	34.5	6.3	6.4	0.7	3.5	2.32	0.42	0.43	0.05	5.52	161	0.463	83.9	29.3	348
xxxxxxx	23335	xxx	Han	man	64	176	89	28.7319	5.33	8.64	4.81	3.64	0.64	1.62	181.73	6.3	81	513	180	120	1.05	0.6	5	retire	xxxxxxxxxxx	2021-03-17	Heart center	37	xxxxxx	85	ab	73	6.76	66.5	24.6	7	1.6	0.3	4.5	1.66	0.47	0.11	0.02	5.03	166	0.469	93.2	33	354
xxxxxxx	29224	xxx	Han	man	78	160	73	28.5156	5.89	5.08	0.53	2.35	1.23	1.11	925.1	2.55	49.39	248			1.09	0.46	0	retire	xxxxxxxxxxx	2021-03-17	Heart center	4	xxxxxx	72		70	8.19	75.3	15	9	0.5	0.2	6.17	1.23	0.74	0.04	0.02	5.2	154	0.457	87.9	29.6	337
xxxxxxx	23375	xxx	Han	man	68	170	71	24.5675	5.76	5.63	1.2	2.68	1.26	1.24		6.49	110.43	406.82	180	100			5	retire	xxxxxxxxxxx	2021-03-18	Heart center	28	xxxxxx	76	a	82	5.09	51.9	42.8	3.9	1	0.4	2.64	2.18	0.2	0.05	0.02	4.47	121	0.392	87.7	27.1	309
xxxxxxx	23311	xxx	Han	man	44	175	84	27.4286	4.57	5.58	1.29	3.75	1.36	2.57	169.37	3.8	81	251.1	120	70	1.27	0.81	4	office worker	xxxxxxxxxxx	2021-03-18	Heart center	16	xxxxxx	78	b	80	8.34	47.1	43	7.7	1.8	0.4	3.93	3.59	0.64	0.15	0.03	5.4	168	0.499	92.4	31.1	337
xxxxxxx	23376	xxx	Han	man	57	172	75	25.3515	4.4	5.36	2.02	3.62	0.85	1.94	69	5.3	97	335	150	100	1.08	0.61	3	worker	xxxxxxxxxxx	2021-03-18	Heart center	50	xxxxxx	76	b	67	8.32	68.6	25.2	4.6	1.2	0.1	5.71	2.12	0.38	0.1	0.01	5.18	160	0.461	89	30.9	347
xxxxxxx	29176	xxx	Uygur	man	47	170	80	27.6817	4.77	5.09	1.38	2.91	1.02	2.01	268.3	4.4	97	190.4			0.97	0.7	6	retire	xxxxxxxxxxx	2021-03-18	Heart center	24	xxxxxx	86		69	6.61	54.6	37.4	6.8	1.2	0	3.61	2.47	0.45	0.08	0	4.81	143	0.429	89.2	30.1	338
xxxxxxx	29231	xxx	Uygur	man	51	175	90	29.3878	4.31	5.01	0.77	2.65	0.99	1.83	139.72	5.9	89	283.2			0.97	0.65	2		xxxxxxxxxxx	2021-03-18	Heart center	2	xxxxxx	92		78	7.03	68.9	22.9	6.3	1.6	0.3	4.84	1.61	0.44	0.11	0.02	4.8	140	1.61	88.5	29.2	329
xxxxxxx	23349	xxx	Uygur	man	55	162	60	22.8624	4.74	5.25	0.83	2.71	0.92	1.84	115.95	9.1	82	282	102	57	0.91	0.68	1	farmer	xxxxxxxxxxx	2021-03-18	Heart center	7	xxxxxx	78	b	90	8.61	54.6	36.8	5	3.5	0.1	4.7	3.07	0.43	0.3	0.1	4.68	138	0.424	90.6	29.5	325
xxxxxxx	23355	xxx	Uygur	man	39	170	68	23.5294	4.74	5.36	0.68	1.91	0.79	0.71	166.77	5.4	69	211	130	90	0.68	0.33	1	farmer	xxxxxxxxxxx	2021-03-19	Heart center	1	xxxxxx	85	84	67	6.18	61.2	26.9	8.1	3.6	0.2	3.78	1.66	0.5	0.22	0.01	4.9	149	0.441	90	30.4	338
xxxxxxx	29267	xxx	Han	woman	71	160	58	22.6562	5.44	5.48	0.85	3.01	1.63	1.83	145.94	4.5	84	209.2	135	60	1.48	0.57	0	farmer	xxxxxxxxxxx	2021-03-20	Heart center	29	xxxxxx	56		76	7.57	66	23.1	5.3	5.3	0.3	5	1.75	0.4	0.4	0.02	4.41	136	0.421	95.5	30.8	323
xxxxxxx	29227	xxx	Han	man	53	180	98	30.2469	8.8	7.9	0.73	4.04	1.24	2.98	238.79	4.8	120	372.6			1.13	0.9	6	cadre	xxxxxxxxxxx	2021-03-20	Heart center	39	xxxxxx	89		81	5.47	70.9	22.9	5.5	0.5	0.2	3.88	1.25	0.3	0.03	0.01	4.48	137	0.401	89.5	30.6	342
xxxxxxx	29225	xxx	Han	man	64	170	69	23.8754	5.28	5.15	1.16	3.82	1.11	2.04	72	7.13	90.85	259.17	130		1.47	0.63	2	retire	xxxxxxxxxxx	2021-03-20	Heart center	13	xxxxxx	74		64	7.69	64.9	25.9	6.2	2.9	0.1	4.99	1.99	0.48	0.22	0.01	4.81	154	0.54	93.6	32	342
xxxxxxx	29268	xxx	Uygur	man	32	175	87	28.4082	4.65	5.14	2.01	4.08	1.15	2.88	274.48	4.5	111	369.4	107	72	1.08	0.92	3	farmer	xxxxxxxxxxx	2021-03-20	Heart center	27	xxxxxx	94		93	4.9	40.7	47	5.3	6.2	0.8	1.99	2.3	0.26	0.3	0.04	4.63	134	0.456	98.5	29	294
xxxxxxx	29257	xxx	Uygur	man	66	165	75	27.5482	5.37	5.7	0.67	4.12	1.25	3.03	90.5	6.4	77	299.7	119	70	1.24	9.8	3	retire	xxxxxxxxxxx	2021-03-20	Heart center	20	xxxxxx	82		76	5.17	53.2	39.5	4.4	2.7	0.2	2.75	2.04	0.23	0.14	0.01	4.63	138	0.424	91.6	29.8	325
xxxxxxx	23394	xxx	Han	woman	51	158	54	21.6311	4.71	5.82	0.99	4.85	1.54	3.09	176.91	34	59	241	121	84	1.42	0.86	6	engineer	xxxxxxxxxxx	2021-03-21	Heart center	17	xxxxxx	73	a	96	4.04	47.1	45.3	5.2	2.2	0.2	1.9	1.83	0.21	0.09	0.01	4.68	149	0.445	95.1	31.8	335
xxxxxxx	23363	xxx	Uygur	man	59	170	74	25.6055	4.89	5.66	1.18	2.24	0.82	1.04	83.07	5.3	66	172	116	88	0.97	0.39	5	retire	xxxxxxxxxxx	2021-03-21	Heart center	12	xxxxxx	76	b	66	4.9	59.3	31.8	6.5	2	0.4	2.91	1.56	0.32	0.1	0.02	5.06	148	0.439	86.8	29.2	337
xxxxxxx	23362	xxx	Han	man	55	174	80	26.4236	4.12	5.53	0.61	2.74	0.91	1.62	103.25	5.9	87	377	140	90	0.92	0.58	6	worker	xxxxxxxxxxx	2021-03-21	Heart center	11	xxxxxx	87	o	50	6.04	62.7	31	4.3	1.5	0.5	3.79	1.87	0.26	0.09	0.03	5.24	160	0.456	87	30.5	351
xxxxxxx	29534	xxx	Han	man	58	178	81	25.565	5.58	4.92	1.21	5.32	1.17	2.92		4.6	74	189.8	105	60			6	civil servant	xxxxxxxxxxx	2021-03-21	Heart center	33	xxxxxx	82		84	8.19	66.1	20	8.2	5.3	0.4	5.41	1.64	0.67	0.43	0.03	4.94	141	0.43	87.2	28.3	327
xxxxxxx	29261	xxx	Uygur	man	67	170	75	25.9516	13.85	9.94	2.4	2.83	0.74	1.33	27	4.19	65.96	220.99			1.04	0.43	3		xxxxxxxxxxx	2021-03-21	Heart center	6	xxxxxx	80		71	6.16	48.2	41.6	7.1	2.9	0.2	2.97	2.56	0.44	0.18	0.01	5.02	148	0.457	91	29.5	324
xxxxxxx	23378	xxx	Han	man	86	182	75	22.6422	7	7.36	1.29	3.02	0.87	2.04	97.17	11.28	89.38	338.28	200	140	1.07	0.48	1	retire	xxxxxxxxxxx	2021-03-22	Heart center	29	xxxxxx	74	b	90	4	79.9	18.3	1.6	0	0.2	5.11	1.17	0.1	0	0.01	5.23	149	0.465	88.9	28.5	320
xxxxxxx	23387	xxx	Han	woman	72	158	75	30.0433	6.23	6.26	2.88	2.9	0.7	1.41	113.51	5.5	66	339			0.94	0.7	0	farmer	xxxxxxxxxxx	2021-03-22	Heart center	4	xxxxxx	89	a	80	8.47	60	32	6	1.9	0.1	5.08	2.71	0.51	0.16	0.01	4.05	128	0.401	99	31.6	319
xxxxxxx	23371	xxx	Han	woman	77	155	60	24.974	5.61	7.59	1.69	4.25	0.82	3.07	172.66	5.4	45	353.09	150	80	1.12	0.86	2	retire	xxxxxxxxxxx	2021-03-22	Heart center	45	xxxxxx	75	b	80	7.7	56.7	35.7	6.2	0.9	0.5	4.37	2.75	0.48	0.07	0.04	3.87	120	0.374	96.6	31	321
xxxxxxx	23395	xxx	Han	woman	73	160	51	19.9219	6.58	5.04	1.11	3.83	1.3	2.41	123.31	3.99	47.33	247.61			1.4	0.58	2	retire	xxxxxxxxxxx	2021-03-22	Heart center	53	xxxxxx	69	b	74	7.56	78.8	11.6	6.9	2.6	0.1	5.96	0.88	0.52	0.2	0.01	4.16	120	0.368	88.5	28.8	326
xxxxxxx	29269	xxx	Han	man	53	165	59.7	21.9284	8.06	7.71	1.72	3.41	1.19	2.24	774.48	4.9	55	326.1			1.47	0.56	2	worker	xxxxxxxxxxx	2021-03-22	Heart center	5	xxxxxx	0		88	9.19	72.7	18.2	8.5	0.2	0.4	6.68	1.67	0.78	0.02	0.04	4.87	150	0.45	91.4	30.8	337
xxxxxxx	23386	xxx	Han	man	47	165	78	28.6501	4.75	5.59	3.28	4.39	0.85	3.07	509.08	4.6	109	578.5			0.97	1.18	3		xxxxxxxxxxx	2021-03-22	Heart center	26	xxxxxx	85	a	82	7.95	44.2	31.4	9.4	1.47	0.3	3.51	2.5	0.75	1.17	0.02	4.57	138	0.413	90.4	30.2	334
xxxxxxx	23392	xxx	Han	man	62	181	65	19.8407	4.8	5.46	1.33	3.06	0.98	2.24	72.16	6.6	57	360	120	80	1.2	0.84	2		xxxxxxxxxxx	2021-03-22	Heart center	5	xxxxxx	70		80	5.7	54.8	31.9	8.4	4.7	0.2	9.99	2.17	1.05	0.2	0.18	6.19	176	0.534	86.3	28.4	330
xxxxxxx	23365	xxx	Han	man	70	172	82	27.7177	13.02	8.21	3.2	4.34	0.71	3.15	59.12	7.6	56.34	327.7	120	80	0.98	0.82	6	retire	xxxxxxxxxxx	2021-03-22	Heart center	42	xxxxxx	80	a	60	6.03	57.6	34.3	6.8	0.8	0.5	3.47	2.07	0.41	0.05	0.03	4.72	144	0.447	94.7	30.5	322
xxxxxxx	23373	xxx	Han	man	72	170	70	24.2215	12.27	7.63	8.86	4.2	0.63	2.41	999	7.79	123.16	318.44			0.95	0.65	5	retire	xxxxxxxxxxx	2021-03-22	Heart center	55	xxxxxx	79	b	80	5.51	61.9	26.7	8.7	2	0.7	3.41	1.47	0.48	0.11	0.04	4.65	141	0.429	92.3	30.3	329
xxxxxxx	23364	xxx	Han	man	79	172	60	20.2812	4.44	4.88	0.87	2.6	0.76	1.83	263.48	7.61	59.34	246.4			0.93	0.49	2	retire	xxxxxxxxxxx	2021-03-22	Heart center	19	xxxxxx	73	b	75	6.41	78.2	14.8	5.6	0.5	0.9	5.01	0.95	0.36	0.03	0.06	4.7	142	0.446	94.9	30.4	321
xxxxxxx	23399	xxx	Uygur	man	62	172	99	33.464	7.53	7.4	1.85	3.7	0.95	2.55	130.18	8.32	62.34	434.64	125	100	1.21	0.67	2	farmer	xxxxxxxxxxx	2021-03-22	Heart center	40	xxxxxx	102	0	87	4.77	57.2	29.6	6.7	5.9	0.6	2.73	1.41	0.32	0.28	0.03	4.68	137	0.429	91.7	29.3	319
xxxxxxx	23388	xxx	Han	man	67	172	79	26.7036	4.74	5.45	2.68	3.23	0.7	1.63	61.84	75	123	347	180	90	0.96	0.64	2	retire	xxxxxxxxxxx	2021-03-24	Heart center	26	xxxxxx	85		80	5.28	55.9	35	6.4	2.5	0.2	2.95	1.85	0.34	0.13	0.01	4.35	149	0.426	97.9	34.3	30
xxxxxxx	23431	xxx	Han	woman	61	157	60	24.3418	4.22	5.6	0.99	3.62	1.13	2.22	60.93	4.8	57	218	130	80	1.15	0.64	6	retire	xxxxxxxxxxx	2021-03-25	Heart center	4	xxxxxx	74	a	80	4.88	50.9	38.7	6.1	3.3	1	2.48	1.89	0.3	0.16	0.05	4.48	137	0.411	91.7	30.6	333
xxxxxxx	23510	xxx	Han	man	64	178	103	32.5085	3.99	5.52	2.13	4.04	0.88	2.43	143.73	9.7	110	511	160	130	1.09	1.03	1	farmer	xxxxxxxxxxx	2021-03-25	Heart center	52	xxxxxx			72	13.47	78.4	15.3	5.9	0.3	0.1	10.56	2.06	0.79	0.04	0.01	5.4	170	0.507	93.9	31.5	335
xxxxxxx	23545	xxx	Uygur	man	30	185	115	33.6012	4.29	5.2	0.67	3.02	0.87	1.96	41.29	5.9	76	314	100	63	0.92	0.92	5	civil servant	xxxxxxxxxxx	2021-03-28	Heart center	49	xxxxxx	90		73	7.55	46.4	40.8	7.7	4.8	0.3	3.5	3.08	0.58	0.36	0.02	5.37	160	0.475	88.5	29.8	337
xxxxxxx	23484	xxx	Han	woman	63	153	55	23.4952	9.85	7.39	2.13	5.08	1.98	3.29	125.34	9.34	54.84	282.97	190	90	1.91	0.82	2	retire	xxxxxxxxxxx	2021-03-28	Heart center	20	xxxxxx	95	b	72	6.71	62.3	30.3	6	1	0.4	4.18	2.03	0.4	0.07	0.03	3.99	122	0.328	95.7	30.6	319
xxxxxxx	23457	xxx	Han	man	80	169	63	22.0581	4.88	5.61	1.56	3.34	1.07	1.99	59.4	7.1	1.9	410	130	84	1.27	0.83	4	retire	xxxxxxxxxxx	2021-03-28	Heart center	19	xxxxxx	80	o	78	9.06	65.9	24.1	6.3	3.4	0.3	5.97	2.18	0.57	0.31	0.03	5.29	160	0.483	91.3	30.2	331
xxxxxxx	29638	xxx	Han	man	81	165	74	27.1809	5.3	4.96	0.53	2.35	1.23	1.11		5.3	110	478.6	170	100			6	retire	xxxxxxxxxxx	2021-04-03	Heart center	16	xxxxxx	80		60	7.31	72.3	18.1	8.2	1.1	0.3	5.29	1.32	0.6	0.08	0.02	4.74	159	0.464	97.6	33.5	343
xxxxxxx	29536	xxx	Han	man	63	170	60	20.7612	5.26	5.2	0.77	2.89	1.26	1.211	29	6.07	75.71	360.2	150	110	0.54	0.412	6	civil servant	xxxxxxxxxxx	2021-04-04	Heart center	10	xxxxxx	75		80	7.68	63.1	26.6	6.4	3.4	0.5	4.85	2.04	0.49	0.26	0.04	4.33	131	0.41	94	30.3	322
xxxxxxx	29537	xxx	Han	man	48	166	75	27.2173	5.03	5.1	2.41	2.54	0.93	1.63	189.31	4.9	88	382.9	180	90	1.02	0.54	3	farmer	xxxxxxxxxxx	2021-04-04	Heart center	29	xxxxxx	80		72	18	91.4	7.4	1.1	0	0.1	16.45	1.33	0.2	0	0.02	5.32	169	0.51	95.1	31.8	334
xxxxxxx	29579	xxx	Han	woman	53	158	74	29.6427	5.5	5.69	3.19	4.56	0.76	2.95	38.8	9	51	327	220	100	1.26	0.98	2		xxxxxxxxxxx	2021-04-05	Heart center	25	xxxxxx	90		70	5.6	50.9	45.5	0.9	2	0.7	2.85	2.55	0.05	0.11	0.04	4.93	145	0.445	90.3	29.4	326
xxxxxxx	29564	xxx	Han	man	56	172	90	30.4218	4.98	5.41	2.39	4.65	0.95	3.29	28.8	5.6	61	338	150	100	1.29	1.03	2	Professional and technical personnel	xxxxxxxxxxx	2021-04-05	Heart center	4	xxxxxx	88		78	9.01	56.9	28.3	6.3	1.7	0.6	5.13	2.55	0.57	0.69	0.05	5.17	156	0.467	90.3	30.2	334
xxxxxxx	29529	xxx	Uygur	man	63	170	78	26.9896	4.19	5.72	1.33	4.82	0.99	3.71	233				180	100			2	retire	xxxxxxxxxxx	2021-04-06	Heart center	46	xxxxxx	75		88	8.89	79.9	14.6	5.4	0	0.1	7.1	1.3	0.48	0	0.01	5.33	160	0.48	89.7	30	335
xxxxxxx	29531	xxx	Han	man	85	172	63	21.2953	5.14	4.87	1.25	2.64	1.03	1.61	145.33	7.8	127	616	180	90	1.06	0.531	5	retire	xxxxxxxxxxx	2021-04-07	Heart center	12	xxxxxx	72		81	12.48	83.1	11.7	5.1	0	0.1	10	37	1.46	0.64	0	0.01	377	12.4	0.37	98.4	329
xxxxxxx	29547	xxx	Uygur	man	50	178	75	23.6713	7.19	9.4	5.11	5.31	1.29	3.83	219.58	4.5	84	390.4	160	20	1.31	1.31	5	civil servant	xxxxxxxxxxx	2021-04-07	Heart center	17	xxxxxx	77		105	5.02	42.8	41.4	9	6.6	0.2	2.15	2.08	0.45	0.33	0.01	5.13	153	0.447	87.1	29.8	342
xxxxxxx	29637	xxx	Han	man	61	168	65	23.03	7.92	7.39	1.02	3.22	1.61	1.92	433.72	4	97	308.9	160	90	1.38	0.5	5	retire	xxxxxxxxxxx	2021-04-07	Heart center	29	xxxxxx	70		68	12.46	94	4.6	0.8	0.4	0.2	11.71	0.57	0.1	0.05	0.02	4.42	136	0.41	91.6	30.8	336
xxxxxxx	29575	xxx	Han	woman	83	160	80	31.25	12.32	7.34	5.32	6.13	0.71	3.62	136.27	5.95	62.82	188	160	100	1.12	1.12	0		xxxxxxxxxxx	2021-04-07	Heart center	5	xxxxxx	80		92	8.43	63.2	25.7	8.2	2.4	0.5	5.33	2.17	0.69	0.2	0.04	3.93	123	0.36	91.6	31.3	342
xxxxxxx	29530	xxx	Han	man	70	167	70	25.0995	4.7	4.9	0.65	3.77	1.02	2.91	245.46	5.2	105	352	116	70	0.86	0.91	2	retire	xxxxxxxxxxx	2021-04-07	Heart center	10	xxxxxx	76		81	7.05	70.3	21.8	7.5	0.3	0.1	4.96	1.54	0.53	0.02	0.01	4.87	138	0.418	85.8	28.3	330
xxxxxxx	29600	xxx	Han	man	58	159	72	28.4799	5.24	4.43	1.23	3.84	1.46	2.62	320.09	71	263.8	5.24	190	110	0.83	0.83	5	retire	xxxxxxxxxxx	2021-04-07	Heart center	4	xxxxxx	67		97	7.91	68.7	22.6	7.8	0.8	0.1	5.43	1.79	0.62	0.06	0.01	5.38	110	0.355	66	20.4	310
xxxxxxx	29581	xxx	Han	woman	77	160	69	26.9531	9.33	7.61	1.82	3.01	0.99	1.48	108.66	6.92	66.15	264	190	80	1.39	0.42	0	retire	xxxxxxxxxxx	2021-04-08	Heart center	9	xxxxxx	76		68	5.92	42.1	47.3	8.6	1.5	0.5	2.49	2.8	0.51	0.09	0.03	4.18	124	0.37	88	29.7	337
xxxxxxx	29601	xxx	Han	woman	72	160	63	24.6094	4.27	5.75	2.54	5.39	0.95	3.82	114.59	8	70	373	180	100	1.23	1.15	1	retire	xxxxxxxxxxx	2021-04-08	Heart center	45	xxxxxx	77		66	7.95	60.2	25	10.9	3.6	0.3	4.79	1.99	0.87	0.29	0.02	3.69	110	0.35	95.4	29.8	313
xxxxxxx	29528	xxx	Han	woman	60	166	70	25.4028	10.36	7.68	4.66	5.35	1.18	3.77	232.81	3.7	82	338.3	220	100	1.28	1.17	0	farmer	xxxxxxxxxxx	2021-04-08	Heart center	31	xxxxxx	85		80	5.4	52.2	41.9	3.3	2.2	0.4	2.82	2.26	0.18	0.12	0.02	4.38	132	0.381	87	30.1	346
xxxxxxx	29642	xxx	Uygur	man	61	175	93	30.3673	6.11	4.84	0.64	4.14	0.95	3.3	52	6.05	79.49	282.89	134	79	1.29	0.81	3	retire	xxxxxxxxxxx	2021-04-10	Heart center	2	xxxxxx	95		78	7.57	59.9	28.4	8.9	2.4	0.4	4.53	2.15	0.67	0.18	0.03	4.3	128	0.4	91.9	29.8	324
xxxxxxx	29565	xxx	Han	man	46	174	78	25.763	4.85	5.23	3.89	4.38	1.18	2.75	506.09	3.9	49	440.5	150	100	1.56	0.71	3	office worker	xxxxxxxxxxx	2021-04-10	Heart center	21	xxxxxx	77		77	10.82	69.1	20.8	9.2	0.4	0.5	7.48	2.25	1	0.04	0.05	4.89	157	0.47	95.5	32.1	336
xxxxxxx	29602	xxx	Han	man	39	175	75	24.4898	9.5	9.49	0.61	2.46	1.28	1.04	21	6.3	58	282	108	88	1.2	0.32	3		xxxxxxxxxxx	2021-04-10	Heart center	42	xxxxxx	77		83	6.9	61	27	8	3.9	0.1	4.21	1.86	0.55	0.27	0.01	4.82	146	0.418	86.7	30.3	349
xxxxxxx	29643	xxx	Han	man	60	173	82	27.3982	4.79	5.24	1.25	2.82	1	1.55	24	6.1	89	346	180	80	1.16	0.53	3	office worker	xxxxxxxxxxx	2021-04-11	Heart center	52	xxxxxx	85		73	5.87	64.7	26.6	6.5	2	0.2	3.8	1.56	0.38	0.12	0.01	4.62	141	0.429	92.9	30.5	329
xxxxxxx	29663	xxx	Han	man	54	174	107	35.3415	4.93	5.91	2.1	2	0.8	1.94	26.2	3.8	74	288	130	68	1.03	0.68	3	driver	xxxxxxxxxxx	2021-04-11	Heart center	16	xxxxxx	90		78	9.7	55.9	31.8	7.1	4.7	0.5	5.42	3.08	0.69	0.46	0.05	4.28	140	0.44	90.7	29	320
xxxxxxx	29661	xxx	Han	man	65	165	59	21.6713	4.77	5.13	2.06	3.94	1.41	2.35	256.1	4.8	73	326	113	75	1.35	0.85	4	retire	xxxxxxxxxxx	2021-04-11	Heart center	23	xxxxxx	65		81	6.76	65.3	28.7	4.7	1	0.3	4.41	1.94	0.32	0.07	0.02	4.65	141	0.427	91.8	30.3	330
xxxxxxx	29639	xxx	Han	woman	70	159	70	27.6888	7.11	7.82	0.78	3.74	0.99	2.62	196.12	3.9	48	197.5	125	69	1.17	0.66	3	retire	xxxxxxxxxxx	2021-04-11	Heart center	10	xxxxxx			61	6.33	64.7	23.89	7.3	3.8	0.3	4.1	1.51	0.46	0.24	0.02	4.69	140	0.43	90.8	29.9	329
xxxxxxx	29603	xxx	Han	woman	36	155	70.8	29.4693	7.16	7.23	1.03	3.32	0.77	2.37	245.42	5	65	373.5	125	90	0.98	0.63	1	not in detail	xxxxxxxxxxx	2021-04-11	Heart center	32	xxxxxx	80		710	5.24	59.2	34.4	5.2	0.6	0.6	3.1	1.8	0.25	0.03	0.03	5.22	160	0.48	92.1	30.7	333
xxxxxxx	29662	xxx	Han	man	52	168	70	24.8016	3.95	5.4	0.92	3.36	1.17	2.08	23.4	4.7	65	286	110	74	1.12	0.66	3		xxxxxxxxxxx	2021-04-11	Heart center	15	xxxxxx	70		67	5.76	55.1	34.8	7.8	2.1	0.2	3.17	2	0.45	0.12	0.01	4.34	144	0.416	95.9	33.2	346
xxxxxxx	29657	xxx	Han	man	58	169	84	29.4107	7.5	8.28	6.86	3.77	0.68	1.23	383.7	5.8	82	368	229	110	1.18	0.63	2	retire	xxxxxxxxxxx	2021-04-11	Heart center	38	xxxxxx	80		77	8.88	70.3	22.1	5.2	2.1	0.3	6.24	1.96	0.46	0.19	0.03	5.71	178	0.516	90.4	31.2	345
xxxxxxx	23701	xxx	Han	man	47	195	66	17.357	4.89	5.61	1.2	5.29	1.28	3.85	174	4.447	97.87	263.11	93	67	1.45	0.89	4	office worker	xxxxxxxxxxx	2021-04-11	Heart center	20	xxxxxx	85		85	6.81	63.4	31.1	3.7	1.5	0.3	4.32	2.12	0.25	0.1	0.02	4.54	152	0.44	96.9	33.5	345
xxxxxxx	29665	xxx	Uygur	man	43	165	77	28.2828	4.78	5.85	1.86	4.23	0.75	3.05	39.2	4.7	68	220	103	65	1.05	1.02	6	civil servant	xxxxxxxxxxx	2021-04-11	Heart center	3	xxxxxx	88		77	7.65	46.8	42.2	9.7	1.2	0.1	3.58	3.23	0.74	0.09	0.01	5.39	161	0.49	90.9	29.9	329
xxxxxxx	29641	xxx	Uygur	man	58	168	69	24.4473	4.74	4.89	1.67	2.67	0.82	1.79	139.24	47.8	94	345.5	131	87	0.82	0.57	1	farmer	xxxxxxxxxxx	2021-04-11	Heart center	12	xxxxxx	85	92	77	8.54	64.4	25.8	8.1	1.5	0.2	5.5	2.2	0.69	0.13	0.02	5.25	150	0.45	85.3	28.6	35
xxxxxxx	29655	xxx	Han	woman	64	161	72	27.7767	6.07	5.95	2.53	4.34	1.01	2.97	159.33	4.5	80	408.6	150	90	1.37	0.9	2	retire	xxxxxxxxxxx	2021-04-12	Heart center	41	xxxxxx	78		73	11.6	79.7	15.5	4.7	0	0.1	9.26	1.8	0.55	0	0.01	3.9	123	0.37	94.9	31.5	332
xxxxxxx	29664	xxx	Han	man	56	170	99	34.2561	5.04	5.27	2.63	3.69	1.01	2.57	303.52	4.6	87	402.8	104	68	0.93	0.76	4	driver	xxxxxxxxxxx	2021-04-12	Heart center	54	xxxxxx	88		81	7.66	60.6	31.6	5.9	1.6	0.3	4.64	2.42	0.45	0.12	0.02	5.94	172	0.516	86.9	29	333
xxxxxxx	23779	xxx	Han	man	65	175	90	29.3878	7.42	8.25	1.53	5.41	1.02	4	129.38	7.5	80	297			1.37	1.17			xxxxxxxxxxx	2021-04-16	Heart center	40	xxxxxx			68	5.68	49.3	40.3	6.9	3	0.5	2.8	2.29	0.39	0.17	0.03	5.34	168	0.487	90.1	31.5	349
xxxxxxx	29768	xxx	Han	man	48	170	71	24.5675	5.18	5.16	2.1	4.01	0.9	2.87	168	5.25	77.7	332.13	112	66	1.12	0.78	2	worker	xxxxxxxxxxx	2021-04-18	Heart center	46	xxxxxx	88	ab	73	9.27	82.6	10.4	6.9	0	0.1	7.66	0.96	0.64	0	0.01	5.2	159	0.47	89.6	30.6	341
xxxxxxx	23948	xxx	Han	woman	63	156	54	22.1893	11.2	7.6	2.22	3.85	0.92	2.11	98.52	3.05	59.58	98	134	98	0.89	0.74	2	retire	xxxxxxxxxxx	2021-04-21	Heart center	5	xxxxxx	78		144	8.8	82.3	10.3	7.2	0	0.2	7.24	0.91	0.63	0	0.02	4.12	123	0.375	91	79.9	328
xxxxxxx	23062	xxx	Han	man	62	172	65	21.9713	5.37	7.69	1.74	3	1.1	1.43	108.03	5.3	73	280	109	67	1.23	0.56	2	retire	xxxxxxxxxxx	2021-04-25	Heart center	31	xxxxxx	78		80	5.72	51	39.9	6.8	2.1	0.2	2.92	2.28	0.39	0.12	0.01	4.58	145	0.433	94.5	31.7	335
xxxxxxx	23959	xxx	Han	woman	76	155	70.9	29.5109	5.13	5.86	2.16	3.71	0.94	2.24	73.15	3.9	50	218	130	80	1.22	0.82	1	retire	xxxxxxxxxxx	2021-04-26	Heart center	23	xxxxxx	92		70	5.32	51.1	39.1	7.3	1.9	0.6	2.72	2.08	0.39	0.1	0.03	4.4	137	0.411	93.4	31.1	333
xxxxxxx	23945	xxx	Uygur	man	50	170	74	25.6055	4.38	5.28	1.31	4.2	1.18	2.67	103.05	9.1	77	371	126	79	1.47	0.91	3	farmer	xxxxxxxxxxx	2021-04-26	Heart center	10	xxxxxx	92		99	12.6	67.1	26	4.6	2.1	0.2	8.45	3.28	0.58	0.26	0.03	5.63	163	0.487	86.5	29	335
xxxxxxx	23936	xxx	Han	woman	73	160	75	29.2969	5.56	8.48	0.87	2.81	1.14	1.43	80	4.9	56	282	127	73	1.41	0.51	1	not in detail	xxxxxxxxxxx	2021-04-26	Heart center	27	xxxxxx	90		59	6.09	58.6	34.5	5.4	1.3	0.2	3.57	2.1	0.33	0.08	0.01	3.64	113	0.337	92.6	31	335
xxxxxxx	23983	xxx	Han	man	50	171	80	27.3588	7.91	6.67	1.64	5.38	1.19	3.19	55.53	7.23	75.34	321.2	127	71	1.42	0.95	2		xxxxxxxxxxx	2021-04-26	Heart center	22	xxxxxx	95		74	9.07	52.8	35.1	8.2	3.5	0.4	4.29	31.8	0.74	0.32	0.04	3.96	124	0.385	97.2	31.3	322
xxxxxxx	23989	xxx	Uygur	woman	60	160	73	28.5156	16.79	7.51	5.84	6.25	1.35	4.43	151.6	8.52	80.14	257.39	143	77	1.3	1.18	1	retire	xxxxxxxxxxx	2021-04-27	Heart center	6	xxxxxx	82		84	6.71	52.3	33.8	6.1	1.8	1	3.84	2.27	0.41	0.12	0.07	3.67	98	0.286	77.9	26.7	343
xxxxxxx	23940	xxx	Han	man	66	170	78	26.9896	11.16	7.8	1.4	3.24	1.47	2.06	294.78	6.58	78.81	231.3	102	60	1.49	0.47	5	retire	xxxxxxxxxxx	2021-04-27	Heart center	8	xxxxxx	94		54	9.95	85.4	11.7	2	0.6	0.3	8.5	1.16	0.2	0.06	0.03	4.45	142	0.423	95.1	31.9	336
xxxxxxx	24024	xxx	Han	man	59	162	78	29.7211	11.78	7.51	2.09	5.39	0.91	3.64	313.21	3.64	76.49	227	114	74	1.01	1.14	1	farmer	xxxxxxxxxxx	2021-04-27	Heart center	17	xxxxxx	98		78	10.57	90.5	8.3	0.8	0	0.4	9.57	0.88	0.08	0	0.04	6.65	141	0.469	70.5	21.2	301
xxxxxxx	23218	xxx	Han	man	50	172	88	29.7458	15.25	8.37	3.86	3.23	1.11	2	164.82	5.2	62	319.5			1.29	0.54	5	office worker	xxxxxxxxxxx	2021-04-27	Heart center	27	xxxxxx	99		75	10	50.2	3.49	0.71	7.4	0.4	5.02	3.49	0.71	0.74	0.04	4.05	123	0.362	89.6	30.4	339
xxxxxxx	23943	xxx	Uygur	man	62	185	90	26.2966	8.42	6.84	3.7	4.26	0.9	2.44	147.1	5.62	79.33	258	153	91	1.12	0.66	0	farmer	xxxxxxxxxxx	2021-04-28	Heart center	45	xxxxxx	100		67	5.34	60.3	28.8	8.6	1.7	0.6	3.22	1.54	0.46	0.09	0.03	5.61	172	0.493	87.9	30.7	349
xxxxxxx	23960	xxx	Han	man	56	178	72	22.7244	4.06	5.01	0.81	3.17	1.27	1.99	87	5.19	77.77	232.79	138	84	1.35	0.5	2	farmer	xxxxxxxxxxx	2021-05-01	Heart center	10	xxxxxx	92		59	3.74	47	38.8	10.2	3.5	0.5	1.76	1.45	0.38	0.13	0.02	5	158	0.471	94.2	31.6	335
xxxxxxx	24002	xxx	Uygur	man	54	175	80	26.1224	4.38	5.31	0.84	5.28	1.26	3.77	143.48	6.8	97	421	113	69	1.37	1.11	1	farmer	xxxxxxxxxxx	2021-05-02	Heart center	40	xxxxxx	92		81	4.26	51	41.3	4.9	2.6	0.2	2.17	1.76	0.21	0.11	0.01	5.01	152	0.452	90.2	30.2	336
xxxxxxx	24028	xxx	Han	man	68	165	65	23.8751	4.05	5.64	1.03	3.85	1.08	2.62	106.74	5.6	89	313	131	85	1.15	0.82	3	retire	xxxxxxxxxxx	2021-05-02	Heart center	8	xxxxxx	88		76	8.6	60.6	77.4	8.6	3.3	0.1	5.21	2.36	0.74	0.28	0.01	4.98	160	0.489	98.2	32.9	327
xxxxxxx	29951	xxx	Uygur	woman	45	180	92	28.3951	9.75	7.68	3.47	5.27	1.4	3.79	154.06	5.3	77.35	228.8	124	83	1.45	1.13	2	farmer	xxxxxxxxxxx	2021-05-02	Heart center	8	xxxxxx	93	O	85	8.58	43.7	44.4	7	4.2	0.7	3.75	3.81	0.6	0.36	0.06	5.3	155	0.46	86	29.2	340
xxxxxxx	29971	xxx	Uygur	woman	53	165	82	30.1194	7.91	7.51	1.05	5.6	5.35	4.41	1.05	4.2	53	421	102	63	7.91	2.14	3	retire	xxxxxxxxxxx	2021-05-02	Heart center	18	xxxxxx	105	0	80	4.49	58.4	32	6	2.5	1.1	2.61	1.43	0.27	0.11	0.05	4.33	132	0.39	91	30.5	335
xxxxxxx	29970	xxx	Han	man	57	165	65	23.8751	13.33	7.65	1.39	2.63	0.85	1.48	550	3.61	84.42	257.41	107	73	1.01	0.45	5	retire	xxxxxxxxxxx	2021-05-02	Heart center	23	xxxxxx	93	0	86	7.41	58.1	28.2	9.4	3.8	0.5	4.31	2.09	0.9	0.28	0.04	4.26	124	0.35	83.1	29.1	350
xxxxxxx	24005	xxx	Han	woman	74	158	80	32.0461	10.44	7.73	1.66	5.25	0.97	3.87	805.43	7.2	74	328	158	70	1.32	1.13	3	retire	xxxxxxxxxxx	2021-05-02	Heart center	37	xxxxxx	86		95	7.62	53.1	33.9	6.7	5.9	0.4	4.05	2.58	0.51	0.45	0.03	3.72	109	0.337	90.6	29.3	323
xxxxxxx	24007	xxx	Han	woman	63	162	63	24.0055	4.93	5.95	1.94	6.18	1.47	4.45	105.11	4.3	58	256	135	80	1.56	1.35	3	retire	xxxxxxxxxxx	2021-05-02	Heart center	44	xxxxxx	85		68	4.6	45.4	47.4	5.7	1.3	0.2	2.09	2.18	2.26	0.06	0.01	4.6	145	0.428	93	31.5	339
xxxxxxx	24021	xxx	Han	man	61	160	73	28.5156	9.96	7.87	1.29	3.62	1	2.4	323.97	7.4	71	288	180	120	0.99	0.67	3	farmer	xxxxxxxxxxx	2021-05-02	Heart center	12	xxxxxx	95		94	4.56	61.5	27.6	7.2	3.3	6.4	2.8	1.26	0.33	0.15	0.02	4.58	125	0.394	86	27.3	317
xxxxxxx	24028	xxx	Han	man	68	165	65	23.8751	4.05	5.64	1.03	3.85	1.08	2.62	106.74	5.6	89	313	131	85	1.15	0.82	3	retire	xxxxxxxxxxx	2021-05-02	Heart center	8	xxxxxx	88		76	8.6	60.6	77.4	8.6	3.3	0.1	5.21	2.36	0.74	0.28	0.01	4.98	160	0.489	98.2	32.9	327
xxxxxxx	23996	xxx	Han	man	62	165	62	22.7732	4.24	5.97	0.84	3.29	1.6	1.62	243.81	5.8	83	410	129	62	1.48	0.57	1	farmer	xxxxxxxxxxx	2021-05-02	Heart center	30	xxxxxx	85		84	10.16	79.7	15.1	4.8	0.3	0.1	8.1	1.53	0.49	0.03	0.01	4.62	138	0.42	90.9	29.9	329
xxxxxxx	23975	xxx	Han	man	46	179	75	23.4075	5.48	5.88	2.73	6.56	0.96	4.91	102.84	5	74	527	110	75	1.15	1.61	3	worker	xxxxxxxxxxx	2021-05-02	Heart center	20	xxxxxx	98		97	5.66	64.8	24	10.8	0.2	0.2	3.67	1.36	0.61	0.01	0.01	5.06	164	0.495	97.8	32.4	331
xxxxxxx	23970	xxx	Han	man	56	172	65	21.9713	7.47	8.16	1.41	4.35	1.85	2.16	151.41	2.55	95.72	273.34	100	60	1.79	0.67	3	not in detail	xxxxxxxxxxx	2021-05-02	Heart center	1	xxxxxx	82		88	5.28	59.1	29	9.1	1.7	1.1	3.12	1.53	0.42	0.09	0.06	4.4	144	0.439	99.8	32.7	328
xxxxxxx	23999	xxx	Han	man	46	182	100	30.1896	7.8	7.4	1.62	3.24	0.67	2.3	319.9	5.79	81.16	512.67	118	78	0.77	0.63	6	cadre	xxxxxxxxxxx	2021-05-02	Heart center	41	xxxxxx	110		76	5.09	55.4	30.3	9.6	3.3	1.4	2.82	1.54	0.49	0.17	0.07	4.29	140	0.399	93	32.6	351
xxxxxxx	24022	xxx	Han	man	77	164	62	23.0518	6.38	5.09	1.31	3.75	0.88	2.02	388.33	7.12	89.23	324	140	81	0.95	0.68	4	retire	xxxxxxxxxxx	2021-05-02	Heart center	11	xxxxxx	85		76	6.32	57.3	33.4	6	3	0.3	3.62	2.11	0.58	0.19	0.02	3.77	124	0.37	98.1	32.9	335
xxxxxxx	24018	xxx	Han	man	55	163	62	23.3355	4.43	5.3	2.44	3.83	0.86	2.18	120.96	7.2	87	438	106	63	1.23	0.67	3	worker	xxxxxxxxxxx	2021-05-02	Heart center	16	xxxxxx	88		69	10	85.1	11.5	2.1	0.7	0.6	8.51	1.15	0.21	0.07	0.06	5.41	155	0.455	84.1	28.7	341
xxxxxxx	23966	xxx	Han	man	61	178	74	23.3556	8.94	8.08	1.77	4.04	0.91	2.88	181.14	5	69	228	131	81	1.11	0.88	3	retire	xxxxxxxxxxx	2021-05-02	Heart center	18	xxxxxx	92		76	9.79	62.2	26.7	9	1.7	0.4	6.09	2.61	0.88	0.17	0.04	5.07	156	0.459	90.5	30.8	340
xxxxxxx	29975	xxx	Han	man	66	171	73	24.9649	6.63	5.21	1.28	3.7	1.06	2.18	151.32	6	63	393			1.23	0.58	5	retire	xxxxxxxxxxx	2021-05-02	Heart center	16	xxxxxx	85	A	81	5.55	74.6	15.9	7.7	1.3	0.5	4.14	0.88	0.43	0.07	0.03	5.43	164	0.48	88.8	30.2	340
xxxxxxx	29952	xxx	Uygur	woman	78	168	89	31.5334	6.27	5.44	1.49	5.94	1.63	4.44	323.25	5	92.47	326.6			1.51	1.22	5	retire	xxxxxxxxxxx	2021-05-03	Heart center	40	xxxxxx	93	B	67	10.07	67	20.5	7.8	4.4	0.3	6.75	2.06	0.79	0.44	0.03	5.53	153	0.47	85.2	27.7	325
xxxxxxx	29976	xxx	Han	man	49	176	80	25.8264	4.4	5.71	1.67	3.78	0.98	2.51	64.6	5.3	65	404	144	497	1.13	0.74	6	operate	xxxxxxxxxxx	2021-05-03	Heart center	53	xxxxxx	86	B	75	15.5	82.5	10.8	6.6	0	0.1	12.79	1.67	1.02	0	0.02	4.49	135	0.41	91.5	30.1	328
xxxxxxx	23995	xxx	Han	man	51	175	79	25.7959	3.75	5.31	0.8	4.31	0.86	3.06	207.34	4.8	85	322.6	140	60	0.94	0.94	4		xxxxxxxxxxx	2021-05-03	Heart center	47	xxxxxx	90		70	8.63	59.3	30.4	8.5	0.8	1	5.12	2.62	0.73	0.07	0.09	5.14	173	0.523	96.9	32	331
xxxxxxx	24006	xxx	Han	man	53	170	75	25.9516	6.14	8	2.21	4.21	0.68	2.91	146.67	6.8	60	352	110	72	0.97	0.91	2	farmer	xxxxxxxxxxx	2021-05-03	Heart center	7	xxxxxx	88		83	10.03	64.1	26.1	5.8	3.8	0.2	6.43	26.2	0.58	0.38	0.02	4.32	130	0.393	91	30.1	331
xxxxxxx	29950	xxx	Han	woman	61	165	65	23.8751	8.69	7.49	2.66	4.01	0.75	2.6	201	5.56	73.29	287.94	124	75	1.02	0.72	5	retire	xxxxxxxxxxx	2021-05-04	Heart center	11	xxxxxx	85	0	77	6.77	6.27	31.5	5.2	0.3	0.3	4.24	2.13	0.35	0.02	0.02	4.82	133	0.4	82	27.6	337
xxxxxxx	24011	xxx	Han	man	54	171	67	22.913	4.65	5.4	2.43	5.73	1.36	3.74	151	6.54	76.8	364.65	160	95	1.59	0.97	4		xxxxxxxxxxx	2021-05-04	Heart center	34	xxxxxx	90		74	5.63	52.2	37.5	5.7	4.1	0.5	2.94	2.11	0.32	0.23	0.03	4.64	145	0.426	91.8	31.3	340
xxxxxxx	29948	xxx	Uygur	man	54	180	95	29.321	5.75	4.83	1.96	3.55	0.97	1.86	868.49	5.28	61.7	294.25			1.11	0.54	2	farmer	xxxxxxxxxxx	2021-05-04	Heart center	27	xxxxxx	92	0	69	6.63	50.8	39.1	6.3	3.5	0.3	3.37	2.59	0.42	0.23	0.02	4.88	140	0.43	88.1	28.7	326
xxxxxxx	29964	xxx	Han	woman	68	155	64	26.6389	5.45	5.79	1.39	3.76	1.19	2.38	96.1	4.2	53	242			1.47	0.81	2	farmer	xxxxxxxxxxx	2021-05-08	Heart center	4	xxxxxx	86	B	64	7	52.5	39.9	6.1	1.4	0.1	3.67	2.79	0.43	0.1	0.01	4.45	136	0.41	91.2	30.6	335
xxxxxxx	24201	xxx	Han	man	52	170	75	25.9516	9.46	7.82	1.81	4.51	1.49	3.01	193.38	3.6	80	332.3	107	73	1.14	0.98	5	office worker	xxxxxxxxxxx	2021-05-15	Heart center	10	xxxxxx	85	b	68	10.14	72	22	5.2	0.2	0.6	7.3	2.23	0.53	0.02	0.06	4.17	123	0.382	91.6	29.5	322
xxxxxxx	24196	xxx	Han	woman	77	155	56	23.3091	6.57	8.57	3.41	3.83	0.061	2.4	57.14	3.5	56	321	135	80	1.05	0.68	1	retire	xxxxxxxxxxx	2021-05-17	Heart center	15	xxxxxx	72	a	76	6.96	56	34.3	6.5	2.9	0.3	3.9	2.39	0.45	0.2	0.02	3.58	110	0.401	112	30.7	274
xxxxxxx	24223	xxx	Han	man	61	178	81	25.565	5.16	4.71	0.76	3.5	0.81	2.55	196.07	3.7	88	391.6	150	80	0.94	0.81	3	staff	xxxxxxxxxxx	2021-05-19	Heart center	45	xxxxxx	78		88	9.39	78	14.2	6.8	0.7	0.3	7.32	1.33	0.64	0.07	0.03	4.37	140	0.411	94.1	32	341
xxxxxxx	22270	xxx	Uygur	man	52	178	105	33.1398	4.59	5.42	1.1	3.5	0.66	2.44	79.96	4.3	64	468	98	73	0.83	0.93	2	worker	xxxxxxxxxxx	2021-05-20	Heart center	8	xxxxxx	110			6.7	47.5	41.8	7.8	2.5	0.4	3.18	2.8	0.5	0.17	0.03	4.54	138	0.415	91.4	30.4	333
xxxxxxx	24339	xxx	Han	woman	69	160	67	26.1719	4.47	5.93	2.12	4.38	0.77	3.16	100.76	5.3	49	290			1.15	1.02	2	others	xxxxxxxxxxx	2021-05-21	Heart center	2	xxxxxx	83		77	5.27	60.1	25.8	9.9	3.4	0.8	3.17	1.36	0.52	0.18	0.04	4.66	146	0.433	92.9	31.3	337
xxxxxxx	24291	xxx	Uygur	man	47	174	102	33.6901	4.3	5.41	1.36	2.52	0.86	1.33	60.9	4.9	99	406	115	75	1.14	0.52	3		xxxxxxxxxxx	2021-05-23	Heart center	27	xxxxxx	88		75	8.52	69.4	21.5	6.8	2.1	0.2	5.91	1.83	0.58	0.18	0.02	5.24	145	0.441	84.2	27.7	329
xxxxxxx	24315	xxx	Uygur	man	77	172	90	30.4218	6.47	7.09	2.07	3.95	1.07	2.63	243.54	4.7	85.03	458.8			0.98	0.94	2	retire	xxxxxxxxxxx	2021-05-23	Heart center	31	xxxxxx	100		74	8	61.9	27.1	7.9	2.5	0.6	4.95	2.17	0.63	0.2	0.05	4.84	131	0.424	87.6	27.1	309
xxxxxxx	24290	xxx	Han	woman	53	164	68	25.2826	4.43	5.88	2.9	4.78	0.97	3.17	109.38	3.5	51	307	160	78	1.1	1.03	3	staff	xxxxxxxxxxx	2021-05-23	Heart center	32	xxxxxx	52		76	4.35	41.8	49.9	5.36	2.3	0.7	1.82	2.17	0.23	0.1	0.03	4.12	130	0.373	91.5	31.6	345
xxxxxxx	24294	xxx	Han	woman	52	173	65	21.7181	4.41	5.76	0.58	4.12	1.89	2.17	80	4.7	58	178	106	71	1.69	0.66	6	not in detail	xxxxxxxxxxx	2021-05-23	Heart center	21	xxxxxx	5		57	5.26	58.5	35.6	4.2	1.1	0.6	3.8	1.87	0.22	0.06	0.03	4.2	128	0.385	91.7	30.5	332
xxxxxxx	24296	xxx	Han	man	47	170	72	24.9135	4.65	5.83	1.17	3.66	1.17	2.25	793.87	5.7	78	375			1.33	0.72		office worker	xxxxxxxxxxx	2021-05-24	Heart center	30	xxxxxx	85		74	6	48.3	43.3	5.5	2.7	0.2	2.9	2.6	0.33	0.16	0.01	5.02	159	0.476	94.8	31.7	334
xxxxxxx	24289	xxx	Uygur	man	56	170	80	27.6817	6.04	5.18	2.25	2.67	0.86	1.58	151.36	3.8	59	290.6	111	66	1.07	0.5	3	teacher	xxxxxxxxxxx	2021-05-25	Heart center	11	xxxxxx	79		69	7.7	66	24.1	8.3	1.2	0.4	5.08	1.86	0.64	0.09	0.03	4.59	143	0.43	93.7	31.2	333
xxxxxxx	24309	xxx	Han	man	56	172	79	26.7036	3.52	5.5	3.41	5.57	0.85	3.79	71.95	6.6	65	477			1.38	1.23	3	cook	xxxxxxxxxxx	2021-05-25	Heart center	15	xxxxxx	90		46	5.09	48.9	40.9	7.3	2.4	0.6	2.48	2.08	0.37	0.12	0.03	4.57	137	0.417	91.2	30	328
xxxxxxx	24310	xxx	Han	man	54	188	92	26.0299	5.43	5.55	3.23	4.58	0.59	3.02	76.9	5.8	80	454			1.01	1.03	2	Professional and technical personnel	xxxxxxxxxxx	2021-05-25	Heart center	38	xxxxxx	95		89	11.34	61.6	30.9	6	0.9	0.6	6.99	3.5	0.68	0.1	0.07	5.09	159	0.471	92.5	31.2	338
xxxxxxx	24311	xxx	Han	man	75	170	77	26.6436	5.17	8.7	0.77	2.89	1.26	1.25									2	retire	xxxxxxxxxxx	2021-05-25	Heart center	19	xxxxxx	90		75	6.66	73.6	17.6	8	0.3	0.5	4.9	1.17	0.53	0.02	0.03	3.69	123	0.367	99.5	33.3	335
xxxxxxx	24353	xxx	Han	man	45	172	83	28.0557	10.06	8.94	2.96	5.62	1.08	3.76	85.59	6.4	74	297			1.25	1.18	3	driver	xxxxxxxxxxx	2021-05-25	Heart center	52	xxxxxx	90		95	9.6	61.8	28.2	8.9	0.9	0.2	6.06	2.76	0.87	0.09	0.02	4.42	141	0.406	91.9	31.9	347
xxxxxxx	24336	xxx	Han	woman	75	150	69	30.6667	5.47	5.78	1.63	6.12	1.2	4.38	140.87	3.3	49	239			1.52	1.35	1	retire	xxxxxxxxxxx	2021-05-26	Heart center	22	xxxxxx	92		84	8.94	73.6	23.8	2.6	1.8	0.2	6.49	2.04	0.23	0.16	0.02	4.56	138	0.425	93.2	30.3	325
xxxxxxx	24328	xxx	Han	woman	74	160	72	28.125	4.94	5.42	0.57	3.11	1.24	1.59	121.74	5.5	73	306			1.39	0.55	3	retire	xxxxxxxxxxx	2021-05-26	Heart center	28	xxxxxx	90		88	5.67	51.5	37.6	6.7	3.7	0.5	2.92	2.13	0.38	0.21	0.03	4.01	125	0.384	95.8	31.2	326
xxxxxxx	24299	xxx	Han	woman	75	150	77	34.2222	3.54	5.38	0.64	2.71	1.15	1.34	77.96	4.8	59	297			1.26	0.32	4	retire	xxxxxxxxxxx	2021-05-26	Heart center	38	xxxxxx	80		70	6.6	56.1	36.5	5.2	1.7	0.5	3.7	2.41	0.34	0.11	0.03	4.28	130	0.404	94.4	30.4	322
xxxxxxx	24329	xxx	Han	man	66	173	83	27.7323	5.26	5.45	1.68	3.78	0.68	2.45	289.29	4.9	93	415			0.96	0.94	1	retire	xxxxxxxxxxx	2021-05-26	Heart center	24	xxxxxx	95		74	14.1	81.4	13.2	4.7	0.2	0.5	11.48	1.86	0.66	0.03	0.07	4.43	140	0.414	93.6	31.6	337
xxxxxxx	24331	xxx	Han	man	81	160	60	23.4375	4.99	5.94	1.64	5.39	1.1	3.95	197.17	8	113	357			1.33	1.18	2	retire	xxxxxxxxxxx	2021-05-26	Heart center	34	xxxxxx	85		56	6.36	53.8	36.9	8.2	0.6	0.5	3.42	2.35	0.52	0.04	0.03	4.43	138	0.428	96.6	31.2	322
xxxxxxx	24349	xxx	Han	man	52	172	80	27.0416	4.07	5.42	3.02	3.9	0.8	2.32	102.82	6.2	80	414			1.13	0.89	5	office worker	xxxxxxxxxxx	2021-05-27	Heart center	46	xxxxxx	90		88	6.8	56.5	30.2	9.7	2.9	0.7	3.84	2.05	0.66	0.2	0.05	5.22	159	0.476	91.3	30.5	334
xxxxxxx	24312	xxx	Uygur	woman	65	160	73	28.5156	5.62	5.08	2.69	4.66	0.74	2.79	65.19	4.46	56.19	196.21			0.94	0.87	2	civil servant	xxxxxxxxxxx	2021-05-27	Heart center	22	xxxxxx	95		78	5.1	55.6	32.9	8.2	2.5	0.8	2.84	1.68	0.42	0.13	0.04	4.4	128	0.398	90.5	29.1	322
xxxxxxx	24362	xxx	Uygur	man	42	170	63	21.7993	4.12	5.52	1.88	3.46	0.72	2.03	71.95	4.3	61	381			1	0.71		others	xxxxxxxxxxx	2021-05-27	Heart center	30	xxxxxx	80		80
xxxxxxx	24330	xxx	Han	woman	54	155	53	22.0604	4.61	6.4	4.83	4.62	0.8	2.18	104.83	3.3	52	179			1.42	0.8	2		xxxxxxxxxxx	2021-05-27	Heart center	22	xxxxxx	82		70	5.37	54.1	38.4	5.8	1.3	0.4	2.91	2.06	0.31	0.07	0.02	4.77	137	0.408	85.5	28.7	336
xxxxxxx	24345	xxx	Han	man	47	170	67	23.1834	5.84	5.29	1.65	3.98	1.23	2.51	283.15	2.8	86	420.4			1.14	0.73	3		xxxxxxxxxxx	2021-05-27	Heart center	23	xxxxxx	95		66	6.48	50.5	37	10.31	0.4	0.8	3.27	2.4	0.67	0.09	0.08	4.58	147	0.436	95.2	32.1	337
xxxxxxx	24360	xxx	Han	woman	58	163	62	23.3355	4.87	5.59	1.34	4.72	1.04	3.16	123.48	4.3	61	351			1.25	0.86	2	retire	xxxxxxxxxxx	2021-05-28	Heart center	34	xxxxxx	76		72	4.02	49.3	36.3	6.5	7.7	0.2	1.98	1.46	0.26	0.31	0.01	4.25	135	0.417	98.1	31.8	324
xxxxxxx	24340	xxx	Han	man	48	172	67	22.6474	4.49	5.19	0.71	2.31	1.07	1.48	247.06	5.9	90	275.4			1.01	0.51	2	farmer	xxxxxxxxxxx	2021-05-28	Heart center	30	xxxxxx	85		60	7.24	81.3	16.4	1.5	0.4	5.89	1.19	0.11	0.03	0.03	0.03	4.61	143	0.431	93.5	51	332
xxxxxxx	24314	xxx	Han	man	54	159	69	27.2932	7.03	7.67	3.1	5.92	1.04	4.37	307.87	6.5	66	378.3			1.14	1.15	2	office worker	xxxxxxxxxxx	2021-05-28	Heart center	4	xxxxxx			104	10.84	73.4	18.7	5.8	1.5	0.6	7.96	2.03	0.63	0.16	0.07	5.06	154	0.455	89.9	30.4	338
xxxxxxx	24364	xxx	Uygur	man	38	176	65	20.984	4.62	5.56	1.48	3.68	1.13	2.14	100.1	5.1	74	313			1.29	0.65	3	farmer	xxxxxxxxxxx	2021-05-29	Heart center	7	xxxxxx	91		80	4.64	68.8	25.6	3.7	1.3	0.6	3.19	1.19	0.17	0.06	0.03	5.06	157	0.452	89.3	31	347
xxxxxxx	24368	xxx	Uygur	woman	46	158	66	26.4381	4.48	5.61	1.17	3.89	1.14	2.37	91.42	4.1	49	229	168	100	1.29	0.67	1	farmer	xxxxxxxxxxx	2021-05-29	Heart center	6	xxxxxx	90		78	5.26	48.4	45.1	5.3	1	0.2	2.55	2.37	0.28	0.05	0.01	4.27	100	0.321	75.2	23.4	312
xxxxxxx	24384	xxx	Han	man	76	162	71	27.0538	5.25	5.17	1.37	2.43	1.07	1.37	89.6	8.1	93	507.5			1.16	0.42		retire	xxxxxxxxxxx	2021-05-30	Heart center	16	xxxxxx	81		68	6.89	69.3	23.2	6.4	1	0.1	4.77	1.6	0.44	0.07	0.01	5.81	179	0.551	94.8	30.8	325
xxxxxxx	24347	xxx	Han	woman	74	163	68	25.5937	4.68	5.15	1.15	3.07	0.95	1.95	85.01	6.2	63	310			1.15	0.63	1	retire	xxxxxxxxxxx	2021-05-30	Heart center	8	xxxxxx	82		77	6.1	67.5	25.6	5.4	1.3	0.2	4.12	1.56	0.33	0.08	0.01	3.83	117	0.365	95.3	30.5	321
xxxxxxx	24376	xxx	Han	man	75	166	63	22.8625	9.82	8.06	0.88	4.36	1.61	2.6	74	4.75	89.57	342.13			1.53	0.56	3	retire	xxxxxxxxxxx	2021-05-30	Heart center	3	xxxxxx	86		75	4.2	58.1	33.1	3.8	4.5	0.5	2.44	1.39	0.16	0.19	0.02	4.47	140	0.417	93.3	31.3	336
xxxxxxx	24350	xxx	Uygur	woman	73	161	74	28.5483	6.67	4.88	2.07	3.65	1.29	2.34	157.11				180	90			2	retire	xxxxxxxxxxx	2021-05-30	Heart center	32	xxxxxx	95		78	11.42	83	11	3.9	1.7	0.4	9.48	1.26	0.45	0.19	0.05	4.95	140	0.428	86.5	28.3	327
xxxxxxx	24361	xxx	Uygur	woman	56	165	55	20.202	8.73	8.09	2.27	3.61	0.79	2.24	57.45	8.3	58	222	156	90	1.05	0.63		farmer	xxxxxxxxxxx	2021-05-30	Heart center	8	xxxxxx	80		82	7.11	46.9	43	7	2	1.1	3.33	3.06	0.5	0.14	0.08	4.43	123	0.375	84.7	27.8	328
xxxxxxx	24358	xxx	Uygur	man	59	165	75	27.5482	5.77	5.59	2.4	4.44	0.81	2.92	226.09	5.2	67	282			1.19	0.91	2	farmer	xxxxxxxxxxx	2021-05-30	Heart center	21	xxxxxx			72	8.26	58	28.9	4.8	7.9	0.4	4.79	2.39	0.4	0.05	0.03	4.55	134	0.425	89.5	31.5	139
xxxxxxx	24363	xxx	Uygur	man	49	174	80	26.4236	8.61	6.67	2.8	2.33	0.78	0.95	30.13	3.32	76.38	280			0.73	0.48	6	office worker	xxxxxxxxxxx	2021-05-30	Heart center	16	xxxxxx	104		67	11.8	72.6	22.3	4.1	0.4	0.6	8.57	2.63	0.48	0.05	0.07	4.97	142	0.443	89.1	28.6	321
xxxxxxx	24351	xxx	Han	woman	74	155	55	22.8928	7.09	9.35	1.55	4.57	0.94	2.99	176.49	6.8	82	285			1.13	0.81	2	retire	xxxxxxxxxxx	2021-05-30	Heart center	2	xxxxxx	80		82	6.76	42	51.2	4.9	1.3	0.6	2.84	3.46	0.33	0.09	0.04	4.72	143	0.428	90.7	30.3	334
xxxxxxx	24354	xxx	Han	woman	62	160	64	25	4.49	5.82	0.94	2.78	1.32	1.26	158.18	5.2	55	212			1.31	0.4	4	retire	xxxxxxxxxxx	2021-05-30	Heart center	37	xxxxxx	85		66	4.82	60.4	32.7	5.6	0.9	0.4	2.79	1.51	0.26	0.09	0.02	4.56	135	0.4113	90.6	29.6	327
xxxxxxx	24355	xxx	Han	woman	70	172	88	29.7458	10.02	9.11	0.69	5.14	1.44	3.51	94.01	5	54	430			1.49	0.96	2	retire	xxxxxxxxxxx	2021-05-30	Heart center	40	xxxxxx	95		72	5.54	58.8	35.2	3.6	2.2	0.2	3.26	1.95	0.2	0.12	0.01	4.28	135	0.398	93	31.5	339
xxxxxxx	24346	xxx	Han	man	82	172	76	25.6896	5.97	5.68	1.26	2.92	0.99	1.59	55.22	6.7	74	281			1.4	0.52	3	retire	xxxxxxxxxxx	2021-05-30	Heart center	32	xxxxxx	85		58	6.89	58.3	33.5	5.5	2.3	0.4	4.02	2.31	0.38	0.16	0.03	4.47	135	0.4	89.5	30.2	338
xxxxxxx	24306	xxx	Han	man	59	170	77	26.6436	6.41	5.62	1.77	3.04	0.82	2.01	305.39	5.6	64	315.8			1.04	0.57	3	office worker	xxxxxxxxxxx	2021-05-30	Heart center	25	xxxxxx	83		75	5.78	62.5	25.6	9.3	2.1	0.5	3.61	1.48	0.54	0.12	0.03	4.85	146	0.441	90.9	30.1	331
xxxxxxx	24344	xxx	Han	man	54	164	66	24.539	4.48	5.52	1.33	5.2	0.89	3.64	347.01	8.4	75	274			1.08	1.07	2	not in detail	xxxxxxxxxxx	2021-05-30	Heart center	12	xxxxxx	85		64	7.6	57.3	29.1	9.2	3.9	0.5	4.35	2.21	0.7	0.3	0.04	4.9	149	0.448	91.4	30.4	332
xxxxxxx	24348	xxx	Han	man	74	165	62	22.7732	7.62	8.83	0.93	3.57	0.94	2.38	138.07	5.6	75	237			1.1	0.69	2	retire	xxxxxxxxxxx	2021-05-30	Heart center	48	xxxxxx	85		54	4	65.6	24.8	6.3	2.8	0.5	2.62	0.99	0.25	0.11	0.02	5.04	150	0.449	89.1	29.8	334
xxxxxxx	24453	xxx	Han	man	53	178	78	24.6181	7.06	7.49	1.7	3.6	1.06	2.41	88	2.73	80.71	287.17			1.12	0.68	3	retire	xxxxxxxxxxx	2021-05-30	Heart center	16	xxxxxx	79		74	11.23	77.2	16.9	5.1	0.2	0.6	8.67	1.9	0.57	0.02	0.07	5.3	167	0.417	88.9	31.5	355
xxxxxxx	24333	xxx	Han	woman	62	163	67	25.2174	7.92	8.79	2.54	6.15	1.52	3.91	92.98	5.2	65	252			1.83	1.13	3	retire	xxxxxxxxxxx	2021-05-31	Heart center	30	xxxxxx	90			8.5	64.5	27.1	5.5	2.8	0.1	5.48	2.3	0.47	0.23	0.01	4.79	148	0.451	94.2	30.9	328
xxxxxxx	24372	xxx	Uygur	man	57	178	85	26.8274	9.4	7.95	3.57	2.96	0.64	1.59	542	5.29	93.72	327.69			0.85	0.53	2	retire	xxxxxxxxxxx	2021-05-31	Heart center	7	xxxxxx	107		100	5.35	74.5	17.9	5	2.4	0.2	3.99	0.96	0.27	0.13	0.01	4.86	148	0.447	92	30.5	331
xxxxxxx	24366	xxx	Han	woman	76	157	55	22.3133	5.4	8.14	1.95	6.2	1.44	4.37	112.31	3.4	59	195	180	90	1.56	1.1	4	retire	xxxxxxxxxxx	2021-05-31	Heart center	4	xxxxxx	97		94	6.02	61.4	31.6	5.3	1.5	0.2	3.7	1.9	0.32	0.09	0.01	4.27	126	0.397	93	29.5	317
xxxxxxx	24365	xxx	Han	woman	71	165	73	26.8136	5.49	5.88	1.37	4.15	0.86	2.95	87.61	3.9	71	381	145	90	1.12	0.9	3	retire	xxxxxxxxxxx	2021-05-31	Heart center	21	xxxxxx	97		84	8.11	57.2	33.4	6.2	2	0.4	4.68	2.71	0.53	0.16	0.03	4.31	132	0.393	91.2	30.6	336
xxxxxxx	24400	xxx	Han	woman	70	159	52	20.5688	5.78	5.44	0.86	6.03	1.68	3.54	175.19	4.51	42.98	270.81			1.87	1.11	3	retire	xxxxxxxxxxx	2021-05-31	Heart center	36	xxxxxx	64		88	4.62	65.4	26.8	6.5	0.4	0.9	3.02	1.24	0.3	0.02	0.04	4.25	126	0.383	90.1	29.6	329
xxxxxxx	24374	xxx	Han	man	71	179	79	24.6559	9.58		2.58	4.26	0.85	3.8	108.25								3	retire	xxxxxxxxxxx	2021-05-31	Heart center	11	xxxxxx	85		71	7	70.9	20.2	7.3	1.4	0.2	4.96	1.41	0.51	0.1	0.01	4.35	131	0.391	90	30.1	335
xxxxxxx	24381	xxx	Uygur	man	49	170	85	29.4118	10.67	8.07	1.68	4.16	0.86	3.04	84	5.28	65.26	158.85			1.03	0.75	1	others	xxxxxxxxxxx	2021-05-31	Heart center	23	xxxxxx	88		70	5.76	44.1	46	7.3	2.4	0.2	2.54	2.65	0.42	0.14	0.01	5.53	152	0.457	82.6	27.5	333
xxxxxxx	24382	xxx	Uygur	man	53	160	82	32.0312	7.41	8.47	1.97	2.82	0.71	1.72	64.33	3.7	70	249			1.04	0.49		retire	xxxxxxxxxxx	2021-06-01	Heart center	10	xxxxxx	95		80	5.06	60.5	30.1	7.8	1.4	0.2	3.56	1.77	0.46	0.08	0.01	4.58	141	0.423	92.4	30.8	333
xxxxxxx	24420	xxx	Uygur	woman	58	163	84	31.6158	5.13	5.38	1.62	4.75	1.08	3.24	62.39	6.4	60	296			1.3	0.81	5	retire	xxxxxxxxxxx	2021-06-01	Heart center	9	xxxxxx	99		84	3.84	53.3	36.2	6.3	3.9	0.3	2.05	1.39	0.24	0.15	0.01	3.93	124	0.37	94.1	31.6	335
xxxxxxx	24379	xxx	Han	woman	54	160	75	29.2969	4.54	5.56	1.09	4.01	1.23	2.58	124.1	5.8	48	209			1.35	0.69	2	retire	xxxxxxxxxxx	2021-06-01	Heart center	32	xxxxxx	95		75	6.34	59.6	32.5	6.3	1.3	0.31	3.78	2.06	0.4	0.08	0.02	4.33	124	0.384	88.7	28.6	323
xxxxxxx	24418	xxx	Han	man	49	177	92	29.3658	4.76	5.75	1.64	3.61	0.73	2.59	103.05	4.4	70	308			1.05	0.76	5	civil servant	xxxxxxxxxxx	2021-06-01	Heart center	4	xxxxxx	84		70	4.38	51.6	39.5	6.2	2.5	0.2	2.26	1.73	0.27	0.11	0.01	4.17	129	0.387	92.8	30.9	333
xxxxxxx	24377	xxx	Han	man	49	175	100	32.6531	6.16	5.85	2.06	3.01	0.76	1.68	82.58	7.6	110	458			1.29	0.6	3	worker	xxxxxxxxxxx	2021-06-01	Heart center	24	xxxxxx	105		73	7.49	55.3	27.9	8.8	3.9	0.1	4.14	2.09	0.66	0.59	0.01	4.84	163	0.467	96.5	33.7	349
xxxxxxx	24380	xxx	Han	man	43	170	85	29.4118	9.99	7.86	2.55	3.75	0.77	2.72	440.06	4	52	440.9			0.93	0.78	3	worker	xxxxxxxxxxx	2021-06-01	Heart center	32	xxxxxx	85		76	5.89	55.3	34	7	2.5	1.2	3.26	2	0.41	0.15	0.07	4.3	125	0.372	86.5	29.1	336
xxxxxxx	24359	xxx	Han	man	74	178	75	23.6713	6.38	5.44	0.92	3.06	1.28	1.47	119.19	4.3	104	285			1.42	0.56	3		xxxxxxxxxxx	2021-06-02	Heart center	34	xxxxxx	79		80	6.64	68.2	25.2	5.1	1.2	0.3	4.53	1.67	0.34	0.08	0.02	4.78	150	0.465	97.3	31.4	323
xxxxxxx	24427	xxx	Uygur	woman	60	158	66	26.4381	6.87	4.99	2.11	4.42	1.03	3.01	241.99								2	farmer	xxxxxxxxxxx	2021-06-03	Heart center	27	xxxxxx	69		72	4.94	56.5	33.4	6.3	3.2	0.6	2.79	1.65	0.33	0.16	0.03	4.53	135	0.4	88.3	29.8	338
xxxxxxx	24386	xxx	Han	woman	55	160	81	31.6406	4.93	8.58	5.17	6.78	0.98	4.09	175.28	3	78	381			1.39	1.2	3	retire	xxxxxxxxxxx	2021-06-03	Heart center	4	xxxxxx	90		60	10	66.4	27.4	4.7	1	0.5	6.64	2.74	0.47	0.1	0.05	4.34	133	0.4	92.2	30.6	332
xxxxxxx	24419	xxx	Han	woman	63	162	55	20.9572	6.33	5.8	1.71	4.97	0.84	3.7	217.45	7.5	56	378			1.18	1.1	1	farmer	xxxxxxxxxxx	2021-06-03	Heart center	14	xxxxxx	69		72	7.48	63.3	29.4	5.5	1.5	0.3	4.73	2.2	0.41	0.11	0.02	4.3	131	0.3985	92.6	30.5	329
xxxxxxx	24461	xxx	Han	man	48	174	82	27.0842	5.13	5.38	2.8	3.26	0.68	1.91	94.08	6	81	420			1.06	0.65	2	civil servant	xxxxxxxxxxx	2021-06-06	Heart center	22	xxxxxx	94		68	4.71	57.6	35.2	4	3	0.2	2.71	1.66	0.19	0.14	0.01	4.63	144	0.419	90.5	31.1	344
xxxxxxx	24459	xxx	Han	woman	81	160	67	26.1719	4.42	5.11	1.23	4.29	1.24	2.95	269.11	3.9	63	295.4			0.99	0.88	1		xxxxxxxxxxx	2021-06-07	Heart center	31	xxxxxx	78		72	5.39	55.6	36.9	5.4	1.7	0.4	3	1.99	0.29	0.9	0.02	4.07	131	0.408	100.2	32.2	321
xxxxxxx	24556	xxx	Han	woman	66	155	50	20.8117	6.17	5.24	0.48	2.38	0.82	1.53	143.82	6.9	86	531.3	200	120	1.01	0.5	2	retire	xxxxxxxxxxx	2021-06-08	Heart center	37	xxxxxx	70	b	95	5.74	67.1	24.4	5.9	2.4	0.2	3.85	1.4	0.34	0.14	0.01	4.65	139	0.429	92.3	29.9	324
xxxxxxx	24512	xxx	Han	woman	63	156	58	23.833	5.48	5.45	1.2	3.24	0.75	2.21	607.76	6.8	53	370			1.02	0.77	3	retire	xxxxxxxxxxx	2021-06-09	Heart center	51	xxxxxx	70	b	86	4.9	67.8	26.7	3.7	1	0.8	3.32	1.38	0.18	0.05	0.04	4.12	124	0.376	91.3	30.1	330
xxxxxxx	24525	xxx	Han	woman	70	155	59	24.5578	4.88	5.42	0.84	2.57	1.07	1.34	68.12	5.3	62	268	180	98	1.2	0.42	4	retire	xxxxxxxxxxx	2021-06-09	Heart center	53	xxxxxx	68	a	78	9.82	59.5	30.5	7.4	1.9	0.7	5.84	3	0.73	0.19	0.07	4.6	131	0.411	89.3	28.5	319
xxxxxxx	24622	xxx	Han	woman	64	162	70	26.6728	4.78	5.67	1.62	3.82	1.09	2.48	90.43	6.7	54	259	160	110	1.29	0.68	1	office worker	xxxxxxxxxxx	2021-06-09	Heart center	5	xxxxxx	68		78	5.28	61.7	30.3	4.7	2.5	0.8	3.26	1.6	0.25	0.13	0.04	1.36	414		97.2	31.9	329
xxxxxxx	24554	xxx	Han	woman	67	158	61	24.4352	4.22	5.72	1.28	3.69	1.02	2.48	122.91	3.5	69	287	170	100	1.26	0.79	2	retire	xxxxxxxxxxx	2021-06-10	Heart center	6	xxxxxx	75	b	86	5.04	55.5	35.5	5.2	3.6	0.2	2.8	1.79	0.26	0.18	0.01	4.15	126	0.373	89.9	30.4	338
xxxxxxx	24514	xxx	Han	woman	63	160	68	26.5625	4.54	5.54	1.2	2.68	1.26	1.2		5	58	345	190	105	1.46	0.45	3	retire	xxxxxxxxxxx	2021-06-10	Heart center	39	xxxxxx	73	a	77	7.71	65.4	27.5	4.3	2.5	0.3	5.04	2.12	0.33	0.19	0.02	4.14	121	0.382	92.3	29.2	317
xxxxxxx	24532	xxx	Han	woman	45	150	45	20	3.55	5.62	1.14	4.33	1.06	2.48	111.67	4.1	73	373	93	63	1.15	0.72	3	worker	xxxxxxxxxxx	2021-06-10	Heart center	39	xxxxxx	70	b	76	7.41	53.9	38.3	4.7	2.1	1	3.99	2.84	0.35	0.16	0.07	3.89	103	0.32	82.3	26.5	332
xxxxxxx	24596	xxx	Han	woman	63	162	63	24.0055	4.95	5.31	4.37	5.88	1.68	4.21	450.36	4.5	48	288.9	180	115	1.27		2	retire	xxxxxxxxxxx	2021-06-13	Heart center	38	xxxxxx	68	b	77	4.91	49.5	44.2	4.7	1.2	0.4	2.43	2.17	0.23	0.06	0.02	4.4	132	0.393	89.3	30	336
xxxxxxx	24549	xxx	Han	woman	64	160	68	26.5625	5.44	5.17	0.97	3.77	2.11	2.33	357.17	4.8	64	354	160	100	1.33	0.68	2	retire	xxxxxxxxxxx	2021-06-13	Heart center	25	xxxxxx	87	b	93	7.46	69.3	22.3	7	1.3	0.1	5.17	1.66	0.52	0.1	0.01	4.44	98	0.323	72.7	22.1	303
xxxxxxx	24562	xxx	Han	woman	60	153	50	21.3593	4.71	5.03	2.52	3.65	1.13	2.55	213.47	5.3	68	348	145	80	0.88	0.75	1	retire	xxxxxxxxxxx	2021-06-13	Heart center	41	xxxxxx	67	a	68	7.33	56.8	35.1	5.5	2.2	0.4	4.16	2.57	0.4	0.16	0.03	4.64	140	0.419	90.3	30.2	334
xxxxxxx	24537	xxx	Han	woman	74	165	74	27.1809	6.21	7.89	2.55	3.94	1.02	2.33	114	4.73	70.11	226.71			1.26	0.63	3	retire	xxxxxxxxxxx	2021-06-13	Heart center	33	xxxxxx	81	a	85	6.3	61.9	29	6	2.5	0.6	3.9	1.83	0.38	0.16	0.04	3.98	125	0.385	96.7	31.4	325
xxxxxxx	24601	xxx	Uygur	man	66	162	79	30.1021		5.55	1.39	2.43	0.85	1.28					180	95			4	retire	xxxxxxxxxxx	2021-06-16	Heart center	30	xxxxxx			80	4.9	44.1	40.6	12.7	1.8	0.8	2.16	1.99	0.32	0.09	0.04	4.25	133	0.407	95.8	31.3	327
xxxxxxx	24630	xxx	Han	woman	76	155	57	23.7253	4.97	5.61	1.54	3.77	1.17	2.23	63.51	7.1	85	421	160	100	1.32	0.57	1		xxxxxxxxxxx	2021-06-20	Heart center	37	xxxxxx	51		77	7.61	63.6	29.3	4.3	2.1	0.7	4.84	2.23	0.33	0.16	0.05	4.75	133	0.403	84.8	28	330
xxxxxxx	23095	xxx	Han	man	77	176	94	30.3461	4.95	7.62	0.41	2.97	1.1	1.8	147.67	7.3	79	311.1			1.29	0.5	5	retire	xxxxxxxxxxx	2021-06-21	Heart center	57	xxxxxx	98		64	4.23	60.1	31.4	7.1	0.9	0.5	2.54	1.33	0.3	0.04	0.02	4.62	143	0.425	92	31	336
xxxxxxx	24644	xxx	Han	man	51	175	68	22.2041	6.14	5.48	0.91	4.44	1.24	3.11	237.48	4.1	66	328.9	101	73	1.14	0.92	3	office worker	xxxxxxxxxxx	2021-06-22	Heart center	4	xxxxxx	53		62	5.41	59.82	34.4	4.1	1.5	0.2	3.24	1.86	0.22	0.08	0.01	4.3	130	0.389	90.5	30.2	334
xxxxxxx	24659	xxx	Han	woman	64	176	74	23.8895	5.96	5.32	0.72	3.24	1.33	2.09	203.18	4.4	72	288.4	130	95	1.12	0.63	5	retire	xxxxxxxxxxx	2021-06-23	Heart center	15	xxxxxx	50		72	7.44	51.1	37.8	9.5	1.5	0.1	3.8	2.81	0.71	0.11	0.01	4.87	150	0.459	94.3	30.8	327
xxxxxxx	24485	xxx	Han	man	68	175	80	26.1224	4.75	5.22	1.08	2.47	1.14	1.14	96.73	4	61	254			1.32	0.35	1	retire	xxxxxxxxxxx	2021-06-29	Heart center	30	xxxxxx	83		80	6.03	57.6	32.3	7.5	2.3	0.3	3.47	1.95	0.45	0.14	0.02	3.62	110	0.348	96.1	30.4	316
xxxxxxx	24861	xxx	Han	woman	57	160	65	25.3906	4.4	7.96	1.09	5.24	1.67	3.37	76	6.24	60.67	337.79	213	107	1.37	0.82	3		xxxxxxxxxxx	2021-06-30	Heart center	46	xxxxxx	84		90	9.98	71.8	24	3	0.9	0.3	7.17	2.4	0.3	0.09	0.03	4.81	148	0.44	91.5	30.8	336
xxxxxxx	24493	xxx	Uygur	man	64	180	92	28.3951	5.14	5.14	0.72	3.22	0.97	2.21	125	8.69	76.39	352.6	200	100	0.86	0.6	2	retire	xxxxxxxxxxx	2021-06-30	Heart center	31	xxxxxx	98		93	6.498	0.2	14	6.9	1.7	0.2	5.01	0.91	0.45	0.11	0.01	4.07	126	0.391	96.1	31	322
xxxxxxx	24472	xxx	Han	woman	50	160	68	26.5625	10.14	8.9	7.29	5.26	0.62	1.65	187.68	5	47	240			1.14	0.72	4	retire	xxxxxxxxxxx	2021-06-30	Heart center	51	xxxxxx	78		75	7.21	65.7	77.5	5	1.7	0.1	4.74	1.98	0.36	0.12	0.01	4.12	105	0.34	82.5	25.5	309
xxxxxxx	24873	xxx	Han	woman	77	150	53	23.5556	4.62	5.398	0.69	2.57	1.45	1.51	261.1	4.48	80	376.5	220	120	1.28	0.44	3		xxxxxxxxxxx	2021-07-01	Heart center	26	xxxxxx	68		70	6.3	59.5	34.9	4.3	1.1	0.2	3.75	2.2	0.27	0.07	0.01	4.59	139	0.421	91.7	30.3	330
xxxxxxx	24483	xxx	Han	woman	74	162	70	26.6728	6.06	5.53	4.21	3.42	0.87	2.01	663.19	4.5	77	265.5			1.21	0.68	3	retire	xxxxxxxxxxx	2021-07-02	Heart center	32	xxxxxx	78		73	3.9	56.32	27.8	12.8	2.7	0.5	2.19	1.08	0.5	0.11	0.02	4.06	122	0.366	90.2	30.1	334
xxxxxxx	24862	xxx	Han	woman	71	156	74	30.4076	5.36	6.18	3.03	4.55	1.21	2.43	138.52	6	76	314	190	115	1.49	0.76	0	not in detail	xxxxxxxxxxx	2021-07-05	Heart center	40	xxxxxx	89		65	8.52	57.6	36.3	4.1	1.8	0.2	4.91	3.09	0.35	0.15	0.02	4.49	139	0.419	93.3	31	332
xxxxxxx	24898	xxx	Han	man	69	168	72	25.5102	4.83	5.27	1.01	3.1	1.3	1.6	102	7.3	90.2	251.58	136	77	1.12	0.45	3	retire	xxxxxxxxxxx	2021-07-06	Heart center	28	xxxxxx	101		87	5.94	59.7	29.3	7.2	3.5	0.3	3.55	1.74	0.43	0.21	0.02	4.17	133	0.395	94.7	31.9	337
xxxxxxx	24872	xxx	Han	woman	63	155	60	24.974	7.31	7.38	3.61	3.63	0.82	1.44	126.69	3.46	69.77	294.34	165	103	1.05	0.61	2	not in detail	xxxxxxxxxxx	2021-07-06	Heart center	4	xxxxxx	72		76	9.323	69.5	19.8	5.8	4.4	0.5	6.48	1.85	0.54	0.41	0.05	2.99	112	0.343	114.7	37.5	327
xxxxxxx	24916	xxx	Han	woman	77	157	60	24.3418	4.47	5.46	1.04	3.29	1.2	1.72	89.56	5.4	72	198			1.43	0.54	3	retire	xxxxxxxxxxx	2021-07-06	Heart center	26	xxxxxx	89		66	5.64	57.4	30.1	5.9	6.4	0.2	3.24	1.7	0.33	0.36	0.01	3.33	114	0.356	106.9	34.2	320
xxxxxxx	24917	xxx	Han	man	76	173	56	18.7109	19.4	7.94	1.91	3.38	0.69	2.26	247.01	6.1	64	135.7	133	52	0.86	0.78	3	retire	xxxxxxxxxxx	2021-07-07	Heart center	34	xxxxxx	87		74	4.42	67.7	23.8	5.4	2.9	0.2	2.99	1.05	0.24	0.13	0.01	4.63	147	0.45	97.2	31.7	327
xxxxxxx	24893	xxx	Han	woman	65	162	63	24.0055	10.58	7.88	1.31	4.21	1.24	3.07	22	4.9	63.45	266.65			1.52	0.98	2	not in detail	xxxxxxxxxxx	2021-07-11	Heart center	9	xxxxxx	96		61	12.23	79.6	16.2	3.6	0.3	0.3	9.74	1.98	0.44	0.04	0.04	4.84	155	0.467	96.5	32	332
xxxxxxx	24975	xxx	Uygur	man	67	168	79	27.9904	6.48	8.16	1.5	4.93	1.03	3.33	65.72	5.4	71	295	120	70	1.37	1	6	retire	xxxxxxxxxxx	2021-07-11	Heart center	19	xxxxxx	89		88	7.11	77.3	18.1	2.5	1	0.1	5.57	1.29	0.18	0.07	0.01	4.95	131	0.401	86.2	28.2	327
xxxxxxx	24983	xxx	Uygur	man	45	170	78	26.9896	4.96	5.63	3.06	5.09	1.12	2.95	100.2	3.2	71	390			1.23	1.07	1		xxxxxxxxxxx	2021-07-12	Heart center	39	xxxxxx	99		86	6.66	47.9	37.5	8.7	5.7	0.2	3.19	2.5	0.58	0.38	0.01	5	161	0.47	94	32.2	343
xxxxxxx	25022	xxx	Han	woman	62	161	68	26.2336	4.61	5.64	2.16	3.16	0.88	2.678	136	6	77	318	200	120	1.28	0.56	3	farmer	xxxxxxxxxxx	2021-07-13	Heart center	23	xxxxxx	73		84	6.59	68.1	23.7	7.6	0.3	0.3	4.49	1.56	1.05	0.02	0.02	4.8	140	0.423	88.1	29.2	331
xxxxxxx	25077	xxx	Han	woman	64	161	64	24.6904	11.1	7.5	1.09	2.61	0.69	1.81	194.39	4.4	50	288.7	120	80	0.79	0.73	3	retire	xxxxxxxxxxx	2021-07-16	Heart center	41	xxxxxx	68	a	84	9.69	87.8	9.1	2.7	0.1	0.3	8.51	0.88	0.26	0.01	0.03	3.62	91	0.322	89	27.3	307
xxxxxxx	25101	xxx	Han	woman	59	163	55	20.7008	6.11	5.68	1.35	2.64	0.81	1.84	110.62	5.5	58	513.9	103	73	0.69	0.66	2	retire	xxxxxxxxxxx	2021-07-18	Heart center	26	xxxxxx	73	a	62	7.81	52.2	36.5	93	1.2	0.8	4.08	2.85	0.73	0.09	0.06	4.59	137	0.442	96.3	29.8	310
xxxxxxx	25082	xxx	Han	woman	62	172	77	26.0276	6.52	6.09	1.71	4.8	0.95	3.17	101.87	3.7	53	3.58	120	90	1.6	1.12	4	retire	xxxxxxxxxxx	2021-07-19	Heart center	48	xxxxxx	84	b	96	8.04	54.1	36.9	5	3.5	0.5	4.35	2.97	0.4	0.28	0.04	4.8	143	0.435	92.9	30.6	329
xxxxxxx	25080	xxx	Han	woman	62	163	68	25.5937	4.41	5.13	1.03	2.91	1.02	1.58	62.37	6.2	56	246	150	90	1.17	0.56	2	retire	xxxxxxxxxxx	2021-07-19	Heart center	32	xxxxxx	73	a	71	5.71	59.7	32.9	5.4	1.6	0.4	3.41	1.88	0.31	0.09	0.02	4.27	133	0.397	93	31.1	335
xxxxxxx	25072	xxx	Han	woman	63	167	82	29.4023	5.05	5.73	1.68	4.8	1.57	2.89	51.37	7.1	62	297	120	80	1.44	0.73	3	retire	xxxxxxxxxxx	2021-07-20	Heart center	19	xxxxxx	88	o	94	7.16	51.4	34.9	11.2	1.8	0.7	3.68	2.5	0.8	0.13	0.05	4.27	129	0.389	81.1	30.2	332
xxxxxxx	25083	xxx	Han	woman	57	158	73	29.2421	5.34	5.78	1.63	3.81	0.85	2.23	107.16	4.4	64	351	120	80	1.1	0.86	2	retire	xxxxxxxxxxx	2021-07-20	Heart center	33	xxxxxx	66	a	65	7.85	65	23.8	7.8	2.9	0.5	5.1	1.87	0.61	0.23	0.04	4.36	133	0.402	92.2	30.5	331
xxxxxxx	25081	xxx	Han	woman	62	165	68	24.977	6.41	5.39	1.57	3.84	0.47	2.41	144.05	2.77	40.85	160.91	120	80	0.69	0.95	3	farmer	xxxxxxxxxxx	2021-07-20	Heart center	23	xxxxxx	72	b	90	7.05	76.6	16	6.7	0.3	0.4	5.4	1.13	0.47	0.02	0.03	4.87	135	0.408	83.8	27.7	331
xxxxxxx	25118	xxx	Han	man	45	170	90	31.1419	8.34	8.44	1.61	5.37	1.03	3.51	158.76	7.5	72	357			1.09	1.17	5	Professional and technical personnel	xxxxxxxxxxx	2021-07-20	Heart center	18	xxxxxx	96	a	92	9.68	63.4	27	7.9	0.7	1	6.14	2.61	0.76	0.07	0.1	4.56	145	0.408	89.5	31.8	355
xxxxxxx	25129	xxx	Han	man	73	169	74	25.9095	14.32	7.57	5.76	3.09	0.74	1.46	56.15	5.89	83.29	3.6			0.57	0.48	2	retire	xxxxxxxxxxx	2021-07-21	Heart center	24	xxxxxx	76	b	80	7.78	68	21.5	6.9	3	0.6	5.29	1.67	0.54	0.23	0.05	4.18	133	0.4	95.7	31.8	333
xxxxxxx	25119	xxx	Han	man	48	174	91	30.0568	14.15	8.19	1.23	2.77	0.75	1.55	86.86	7.62	122.8	636.47	101	64	0.91	0.49	3	civil servant	xxxxxxxxxxx	2021-07-21	Heart center	32	xxxxxx	97	ab	90	9.04	71.7	20.6	4.9	2.5	0.3	6.48	1.86	0.44	0.23	0.03	4.02	121	0.382	95	30.1	317
xxxxxxx	25142	xxx	Uygur	man	55	185	90	26.2966	4.93	5.73	0.89	2.6	0.96	1.28	100.24	4.4	80	323			1.12	0.46	5	civil servant	xxxxxxxxxxx	2021-07-22	Heart center	21	xxxxxx	84	b	83	6.68	67.1	22	7.9	2.7	0.3	4.48	1.47	0.53	0.18	0.02	4.66	143	0.441	94.6	30.7	324
xxxxxxx	25138	xxx	Han	man	61	182	100	30.1896	4.52	5.3	1.19	3.24	0.97	1.78	94.96	3.2	71	328			1.16	0.67	5		xxxxxxxxxxx	2021-07-24	Heart center	42	xxxxxx	110	ab	66	7.02	63.5	24.6	7.1	4.7	0.1	4.46	1.73	0.5	0.33	0.01	4.52	138	0.425	94	30.5	325
xxxxxxx	25123	xxx	Han	man	45	175	78	25.4694	5.95	4.78	1.68	4.19	0.84	2.5	167.86	4.53	70.85	207	96	53	0.92	0.76	2		xxxxxxxxxxx	2021-07-25	Heart center	23	xxxxxx	85	b	76	8.84	59	30.1	7.9	2.4	0.6	5.22	2.66	0.7	0.21	0.05	4.55	139	0.406	89.2	30.5	342
xxxxxxx	25133	xxx	Han	man	51	171	90	30.7787	6	5.35	4.72	3.48	0.76	1.39	126.01	7.31	90.79	237	140	97	0.71	0.58	5		xxxxxxxxxxx	2021-07-25	Heart center	46	xxxxxx	92	ab	70	6.56	63.1	27.1	7.2	1.5	1.1	4.14	1.78	0.47	0.1	0.07	5.36	147	0.438	81.7	27.4	336
xxxxxxx	25124	xxx	Uygur	man	75	165	68	24.977	7.18	7.73	1.52	4.49	1.41	3.18	622.56	11.3	77	418			1.63	0.98	2	farmer	xxxxxxxxxxx	2021-07-25	Heart center	25	xxxxxx	85	ab	90	8.4	66.4	20.2	11.7	1.3	0.4	5.58	1.7	0.98	0.11	0.03	4.94	137	0.438	88.7	27.7	313
xxxxxxx	25151	xxx	Han	man	67	170	74	25.6055	5.37	8.53	1.08	3.4	1.17	1.9	73.57	5	81	346	119	76	1.17	0.68	2	retire	xxxxxxxxxxx	2021-07-26	Heart center	31	xxxxxx	80	a	77	9.45	65.1	23.7	7.1	3.8	0.3	6.15	2.24	0.67	0.36	0.03	4.27	111	0.358	83.8	26	310
xxxxxxx	25163	xxx	Uygur	man	44	176	83	26.7949	4.48	5.6	1.86	3.47	0.87	2.16	53.75	1.9	60	437	102	67	1.1	0.71	5		xxxxxxxxxxx	2021-07-26	Heart center	5	xxxxxx	83	ab	69	5.36	52.6	37.5	5.6	3.9	0.4	2.82	2.01	0.3	0.21	0.02	4.9	152	0.458	93.5	31	332
xxxxxxx	25150	xxx	Han	man	55	174	80	26.4236	4.51	4.97	6.46	6.69	0.89	3.4	94.03	7.89	59.99	302	124	88	1.65	1.31	3		xxxxxxxxxxx	2021-07-26	Heart center	1	xxxxxx	90	a	85	8.9	58.2	34	6.9	0.8	0.1	5.18	3.03	0.61	0.07	0.01	5.6	166	0.519	92.6	29.7	321
xxxxxxx	25170	xxx	Han	man	59	175	79	25.7959	6.3	6.1	1.34	5	1.13	3.4	73.94	4.9	78	405	146	75	1.25	1.08	5	office worker	xxxxxxxxxxx	2021-07-27	Heart center	38	xxxxxx	86	b	79	7.06	54.9	33.4	8.1	3.3	0.3	3.88	2.36	0.57	0.23	0.02	5.18	1610	0.472	91.1	31.1	341
xxxxxxx	25450	xxx	Han	woman	80	165	74	27.1809	6.46	5.67	3.09	3.46	0.98	2.35	165.53	9.2	126	534	180	110	0.86	0.79	1	retire	xxxxxxxxxxx	2021-08-08	Heart center	42	xxxxxx	108		73	7.19	67	27.3	4.7	0.7	0.3	4.82	1.96	0.34	0.05	0.02	3.38	105	0.323	95.6	31.1	325
xxxxxxx	25448	xxx	Uygur	man	70	172	76	25.6896	6.16	8.27	1.51	3.39	0.92	2.13	91.12	62.76	62	351	144	79	1.06	0.66	2	retire	xxxxxxxxxxx	2021-08-10	Heart center	25	xxxxxx	84		72	5.96	65.2	18	9.1	7.2	0.5	3.89	1.07	0.54	0.43	0.03	4.29	114	0.372	86.7	26.6	306
xxxxxxx	25441	xxx	Han	woman	43	155	74	30.8012	5.01	5.39	1.27	7.64	1.32	6.3	374.52	9.4	62	304.4	114	64	1.34	1.75	4	office worker	xxxxxxxxxxx	2021-08-11	Heart center	27	xxxxxx	88		51	6.67	52.6	39.1	5.8	2.2	9.3	3.51	2.61	0.39	0.15	0.02	4.09	120	0.38	92.9	29.3	316
xxxxxxx	25444	xxx	Uygur	woman	56	170	87	30.1038	5.09	5.61	1.78	6.13	1.28	4.51	24.92	4.8	49	356	110	76	1.48	1.32	5	retire	xxxxxxxxxxx	2021-08-11	Heart center	23	xxxxxx	102		90	5.5	57.3	32.7	8.2	1.6	0.2	3.15	1.8	0.45	0.09	0.01	4.4	127	0.4	90.9	28.9	318
xxxxxxx	25447	xxx	Han	man	63	175	83	27.102	8.1	7.39	0.69	2.57	0.74	1.63	73.99	6	74	341.4	117	66	0.82	0.61	3	retire	xxxxxxxxxxx	2021-08-12	Heart center	9	xxxxxx	86		69	9.31	64.6	26.3	6.8	1.7	0.6	6.01	2.45	0.63	0.16	0.06	5.15	152	0.467	90.7	29.5	325
xxxxxxx	25686	xxx	Han	woman	75	155	65	27.0552	4.97	5.07	1.42	2.35	0.36	1.3	124.21	3.9	50	182.7	180	100	0.78	0.62	2	retire	xxxxxxxxxxx	2021-08-19	Heart center	3	xxxxxx			58	3.68	89	5	5.5	0	0.5	19.3	1.08	1.19	0	0.11	4.41	131	0.403	91.4	29.7	325
xxxxxxx	25658	xxx	Uygur	woman	36	166	89	32.2979	4.71	5.13	1.5	3.83	1.25	2.79	89.45	5.5	69	258.8	120	75	1.31	0.79	1	farmer	xxxxxxxxxxx	2021-08-20	Heart center	21	xxxxxx	90	A	80	8.49	92.2	40	5.1	2.6	0.1	4.43	3.4	0.43	0.22	0.01	4.51	129	0.396	87.8	28.6	326
xxxxxxx	25639	xxx	Uygur	woman	58	160	58	22.6562	21.75	8.14	2.76	3.88	0.64	2.95	182.28	8.8	84	455.4	160	90	0.75	1.02	6		xxxxxxxxxxx	2021-08-23	Heart center	51	xxxxxx			72	10.36	63.6	28.95	5.8	1	0.7	6.59	2.99	0.6	0.1	0.07	4.45	140	0.405	90	31.5	346
xxxxxxx	25654	xxx	Uygur	man	60	173	69	23.0546	4.19	5.28	1.5	3.64	1.04	2	183.26	10.8	85	26.5	118	84	1.1	0.77	1	farmer	xxxxxxxxxxx	2021-08-23	Heart center	36	xxxxxx	52		72	8.3	61	29.6	7	2.2	0.2	5.06	2.46	0.88	0.18	0.02	4.83	150	0.474	98.1	31.1	36
xxxxxxx	25643	xxx	Han	man	55	178	90	28.4055	3.74	5.4	1.77	3.69	0.99	2	87.88	4.7	89	248	160	140	1.09	0.73	2	driver	xxxxxxxxxxx	2021-08-23	Heart center	44	xxxxxx	89	b	68	9.21	62.9	30.8	5.9	0.3	0.1	5.79	2.84	0.54	0.03	0.01	4.85	149	0.437	90.1	30.7	341
xxxxxxx	25663	xxx	Han	man	53	176	86	27.7634	5.09	7.83	1.96	4.01	0.94	2.44	99.43	5.5	67	298	130	78	1.17	0.78	2	worker	xxxxxxxxxxx	2021-08-23	Heart center	9	xxxxxx	86		70	9.26	53.1	40.2	5.6	0.9	0.2	4.92	3.72	0.52	0.08	0.02	5.05	151	0.449	88.9	29.9	336
xxxxxxx	25682	xxx	Han	man	81	173	70	23.3887	2.79	5.46	0.9	2.89	0.92	1.6	36.79	9.1	79	288	180	90	0.96	0.63	1		xxxxxxxxxxx	2021-08-23	Heart center	30	xxxxxx	80		66	4.81	72	18.2	6.9	2.9	0	3.25	0.82	0.31	0.13	0	4.28	135	0.402	93.9	31.5	336
xxxxxxx	25683	xxx	Uygur	man	66	180	100	30.8642	4.35	5.32	1.51	3.67	0.52	2.6	135	5.4	77	347	170	90	0.75	0.82	2		xxxxxxxxxxx	2021-08-23	Heart center	32	xxxxxx	89		71	5.72	69.4	20.8	7.5	2.1	0.2	3.97	1.19	0.43	0.12	0.01	4.32	137	0.415	96.1	31.7	330
xxxxxxx	25677	xxx	Han	man	45	161	69	26.6193	7.94	8.29	3.24	7.76	1.1	5.16	92.45	3.26	73.86	434			1.16	1.55	6	office worker	xxxxxxxxxxx	2021-08-24	Heart center	29	xxxxxx			86	6.23	44.8	44.3	9.3	0.5	1.1	2.79	2.76	0.58	0.03	0.07	5.01	157	0.454	90.6	31.3	346
xxxxxxx	25657	xxx	Han	man	53	172	84	28.3937	4.73	5.55	1.23	4.37	0.93	3.06	113.28	4.5	81	365	130	77	1.05	0.92	2	farmer	xxxxxxxxxxx	2021-08-24	Heart center	13	xxxxxx	108		84	7.38	64.8	26.4	6.2	1.9	0.7	9.78	1.95	0.46	0.14	0.05	4.19	124	0.381	90.9	29.6	325
xxxxxxx	25672	xxx	Han	man	66	175	70	22.8571	3.98	5.47	1.32	3.4	0.8	2.2	23.51	4.9	54	330	117	66	0.9	0.8	0	farmer	xxxxxxxxxxx	2021-08-24	Heart center	1	xxxxxx	65		65	7.64	62	32.6	4.6	0.7	0.1	4.74	2.49	0.35	0.05	0.01	4.94	150	0.474	96	30.4	316
xxxxxxx	25645	xxx	Han	man	76	178	73	23.04	5.49	4.7	3.23	3.19	0.99	1.48	131.34	3.2	80.66	171	140	90	0.85	0.5	5	retire	xxxxxxxxxxx	2021-08-25	Heart center	21	xxxxxx	69	A	78	5.52	70.1	17.8	8.3	3.3	0.5	3.87	0.98	0.46	0.18	0.03	4.7	142	0.439	93.4	30.2	323
xxxxxxx	25681	xxx	Han	man	51	182	101	30.4915	6.26	5.03	1.96	3.32	0.78	2.16	64.17	4.09	77.25	388	170	110	0.8	0.6	6	civil servant	xxxxxxxxxxx	2021-08-25	Heart center	43	xxxxxx			63	6.5	57.7	33.1	6.6	1.5	1.1	3.75	2.15	0.43	0.1	0.07	4.94	152	0.444	89.9	30.8	342
xxxxxxx	25640	xxx	Han	man	62	163	72	27.0993	4.4	5.04	2.97	6.05	1.15	3.61	69.32	6.25	78.88	349	185	100	1.09	1.19	5		xxxxxxxxxxx	2021-08-25	Heart center	26	xxxxxx			52	6.31	48.8	38.1	9.2	2.9	1	3.07	2.4	0.58	0.18	0.06	4.78	140	0.434	90.8	29.3	323
xxxxxxx	25641	xxx	Uygur	man	64	175	100	32.6531	7.63	33.87	3.6	5.99	1.01	4.2	8.2	7.5	92	279	220	90	1.3	1.41	1	retire	xxxxxxxxxxx	2021-08-26	Heart center	47	xxxxxx	92	a	69	4.9	54.1	35.9	7.6	1.8	0.6	2.65	1.76	0.37	0.09	0.03	4.96	146	0.43	86.7	29.4	340
xxxxxxx	25688	xxx	Uygur	man	51	174	71	23.4509	4.94	5.42	1.42	2.35	0.36	1.3	1.42	7.6	87	313	180	140	0.78	0.12	2	farmer	xxxxxxxxxxx	2021-08-26	Heart center	16	xxxxxx	50		82	7.18	71.9	19.9	5.7	2.4	0.1	5.16	1.43	0.41	0.17	0.01	4.36	123	0.388	89	28.2	317
xxxxxxx	25745	xxx	Uygur	man	52	168	80	28.3447	5.4	5.75	1.33	4.18	0.65	2.93	57	5.7	97	585	143	98	0.09	2.63	2	driver	xxxxxxxxxxx	2021-08-26	Heart center	27	xxxxxx	92		80	9.31	62.8	23.1	6.1	7.5	0.5	5.85	2.15	0.57	0.7	0.05	4.91	146	0.45	91.6	29.7	324
xxxxxxx	25650	xxx	Han	man	61	175	70	22.8571	5.31	7.88	1.46	3.49	1.23	1.88	285.17	6.3	63	272	200	120	1.39	0.71	5	retire	xxxxxxxxxxx	2021-08-26	Heart center	8	xxxxxx	80	a	82	9	56.1	35.9	4.7	3.2	0.1	5.5	3.23	0.42	0.29	0.01	5.66	166	0.494	87.3	29.3	336
xxxxxxx	25667	xxx	Han	man	44	175	63	20.5714	5.57	7.35	0.89	2.53	1.06	1.59	149.64	6.8	71	356.6	90	65	0.94	0.42	6	office worker	xxxxxxxxxxx	2021-08-26	Heart center	7	xxxxxx	75		79	6.12	59.8	31.5	6.9	1.3	0.5	3.66	1.93	0.42	0.08	0.03	4.27	122	0.389	91.1	28.6	314
xxxxxxx	25687	xxx	Han	man	56	174	84	27.7447	4.67	5.96	0.84	2.45	0.9	1.24	114.02	3.9	56	274	105	64	1.15	0.53	4		xxxxxxxxxxx	2021-08-26	Heart center	22	xxxxxx			66	5.06	52.6	29.8	6.7	1.03	0.6	2.66	1.51	0.34	0.52	0.03	4.51	147	0.432	95.8	32.6	340
xxxxxxx	25767	xxx	Han	man	63	170	79	27.3356	11.88	7.17	6.01	4.52	0.77	2.6	47	4.6	72	327	120	70	1.23	1.38	4	retire	xxxxxxxxxxx	2021-08-27	Heart center	3	xxxxxx	92		68	8.09	55.1	32.9	8.4	2.5	1.11	4.46	2.66	0.08	0.2	0.09	4.61	139	0.41	89.6	30.2	337
xxxxxxx	25743	xxx	Han	man	56	176	64	20.6612	4.03	5.33	0.77	2.11	0.92	0.87	72.65	5.8	74	367	103	70	1	0.46	5	worker	xxxxxxxxxxx	2021-08-29	Heart center	30	xxxxxx	89		62	7.73	58.3	32.6	7.1	1.9	0.1	4.51	2.52	0.55	0.15	0.09	5.07	150	0.463	91.3	29.6	324
xxxxxxx	25723	xxx	Han	man	69	168	80	28.3447	5.3	5.8	1.145	3.19	0.73	1.77	0.78	6.3	103	36	175	100	1.77	0.78	4		xxxxxxxxxxx	2021-08-29	Heart center	21	xxxxxx			88	6.5	60.3	21.4	9.3	3.4	0.6	3.92	1.72	0.6	0.22	0.04	4.48	149	0.44	97.5	33.3	341
xxxxxxx	25707	xxx	Han	man	51	174	84	27.7447	5.41	7.3	0.71	2.83	0.99	1.83	76	6.54	71.12	344.81	160	100	1.03	0.42	5	retire	xxxxxxxxxxx	2021-08-29	Heart center	15	xxxxxx	73		65	5.63	80.6	14.7	2.7	1	0.4	4.54	0.83	0.15	0.09	0.02	4.31	128	0.377	87.5	29.7	340
xxxxxxx	25720	xxx	Han	man	77	170	81	28.0277	4.73	5.58	1.57	3.97	0.81	2.65	71.82	5.1	75	277	160	100	0.94	0.91	2		xxxxxxxxxxx	2021-08-30	Heart center	7	xxxxxx			90	4.35	53.1	35.4	8.5	2.8	0.2	2.31	1.54	0.37	0.12	0.01	4.49	143	0.435	96.6	31.8	239
xxxxxxx	25735	xxx	Han	woman	64	163	72	27.0993	5.17	4.39	2.1	4.35	1.89	2.66	355.04	3.3	81	311	180	100	1.94	0.56	1	farmer	xxxxxxxxxxx	2021-08-30	Heart center	26	xxxxxx	89		80	5.99	49.5	40.6	6.7	2.5	0.7	2.97	2.43	0.4	0.15	0.04	4.29	133	0.409	95.3	31	325
xxxxxxx	25727	xxx	Han	man	68	174	59	19.4874	4.04	5.1	1.65	4.78	0.94	3.61	201.55	3.6	48	226.7	148	71	1.04	1.05	2		xxxxxxxxxxx	2021-08-30	Heart center	15	xxxxxx			85	12.88	80.1	11	7.9	0.8	0.2	10.32	1.42	1.02	0.1	0.03	4.14	126	0.374	90.3	30.4	337
xxxxxxx	25694	xxx	Uygur	man	55	177	87	27.7698	3.03	5.22	1.83	3.57	0.79	2.36	176.05	6.4	71	463.1	130	80	1	0.74	0	farmer	xxxxxxxxxxx	2021-08-31	Heart center	37	xxxxxx	79	A	75	10.77	63.6	21.6	6.8	2.4	0.6	6.85	2.86	0.73	0.26	0.06	5.51	160	0.488	88.6	29	328
xxxxxxx	25721	xxx	Han	man	39	173	78	26.0617	5.36	6.25	7.4	4.59	0.07	2.39	289.1	4.93	76.24	380.8	140	81	0.95	0.76		civil servant	xxxxxxxxxxx	2021-08-31	Heart center	30	xxxxxx			75	4.54	59.9	33	5.1	1.3	0.7	2.72	1.5	0.23	0.06	0.03	4.72	147	0.43	91.1	31.1	342
xxxxxxx	25812	xxx	Han	man	44	170	78	26.9896	4.2	5.2	1.64	2.54	0.86	1.43	114.61	3.4	72	386	117	68	1.07	0.59	2	cook	xxxxxxxxxxx	2021-08-31	Heart center	2	xxxxxx			64	14.92	89.9	7	2.5	0.2	0.4	13.41	1.04	0.37	0.03	0.06	4.76	147	0.429	90.1	30.9	343
xxxxxxx	25785	xxx	Uygur	woman	64	164	75	27.8852	4.79	5.18	0.81	4.16	1.24	2.89	100.66	6.7	64	250.6	169	109	1.07	0.89	2	not in detail	xxxxxxxxxxx	2021-09-01	Heart center	45	xxxxxx	102		97	8.82	73.2	18.5	7.4	0.7	0.2	6.46	1.63	0.65	0.06	0.02	4.77	136	0.404	84.7	28.5	337
xxxxxxx	25730	xxx	Uygur	man	51	160	65	25.3906	12.65	8.85	3.71	4.31	0.76	3.21	712.96	6.61	52.8	234.23	138	82	0.78	0.79	5	civil servant	xxxxxxxxxxx	2021-09-01	Heart center	37	xxxxxx			86	8.21	64.8	27.4	5.6	1.5	0.7	5.32	2.25	0.46	0.12	0.06	4.48	135	0.4	89.3	30.1	338
xxxxxxx	25774	xxx	Uygur	woman	56	175	106	34.6122	5.15	5.26	2.43	3.53	0.77	2.1	131.96	2.9	37	303	130	80	1.13	0.98	1	farmer	xxxxxxxxxxx	2021-09-02	Heart center	13	xxxxxx	110		80	12.19	67.3	27	3.9	1.6	0.2	4.47	1.43	0.424	0.2	0.02	4.47	143	0.424	94.9	32	337
xxxxxxx	25783	xxx	Uygur	woman	57	163	94	35.3796	4.78	5.44	2.25	5.55	0.98	3.87	253.91	5.3	61	245.6	125	83	1.2	1.02		retire	xxxxxxxxxxx	2021-09-03	Heart center	9	xxxxxx	110		86	6.63	53.7	34.8	6.9	3.2	1.4	3.56	2.31	0.46	0.21	0.09	5.13	148	0.458	89.3	28.8	323
xxxxxxx	25754	xxx	Han	man	52	170	92	31.8339	7.24	7.06	2.16	4.3	0.81	2.62	101.79	3.67	78.41	279	110	60	0.8	0.66	3	not in detail	xxxxxxxxxxx	2021-09-04	Heart center	46	xxxxxx	102		68	6.53	61.5	28	8.4	1.2	0.9	4.02	1.83	0.55	0.08	0.06	5.4	158	0.483	89.4	29.3	327
xxxxxxx	25777	xxx	Han	woman	51	168	79	27.9904	5.63	5.6	0.9	5.06	1.57	3.47	105.22	5.7	77	263.3	230	120	1.35	1.06	5	teacher	xxxxxxxxxxx	2021-09-04	Heart center	38	xxxxxx	87		71	4.96	45.8	47	3.8	2.8	0.6	2.27	2.33	0.19	0.14	0.03	3.81	110	0.346	90.8	28.9	318
xxxxxxx	25771	xxx	Han	man	42	170	63	21.7993	4.3	5.55	2.65	4.79	1.25	3.16	134.35	3.8	88	361.9	160	100	1.15	0.99	6	office worker	xxxxxxxxxxx	2021-09-04	Heart center	44	xxxxxx	86		72	5.91	56.3	34.7	6.4	2.4	0.2	3.33	2.05	0.38	0.14	0.01	4.72	152	0.455	96.4	32.2	334
xxxxxxx	25751	xxx	Uygur	man	58	178	104	32.8241	4.65	5.22	1.43	6.4	1.08	5.27	433.62	7.16	58.24	261.79	146	90	1.16	1.34	3	office worker	xxxxxxxxxxx	2021-09-04	Heart center	5	xxxxxx	102			7.45	53.9	39.1	6	0.9	0.1	2.91	0.45	0.07	0.01	0.1	4.29	134	0.407	94.9	31.2	329
xxxxxxx	25755	xxx	Han	woman	74	167	63	22.5896	7.59	7.16	1.09	3.66	1.09	2.45	208.34	2.81	61.39	246	230	120	0.98	0.7	1	retire	xxxxxxxxxxx	2021-09-04	Heart center	40	xxxxxx	86		64	6.53	70.2	20.8	7	1.7	0.3	4.58	1.36	0.46	0.11	0.02	3.54	111	0.352	99.4	33.1	332
xxxxxxx	25789	xxx	Han	woman	67	166	56	20.3223	11.26	9.34	1.09	4.31	0.99	3.19	140.55	2.8	44	217	170	90	1.13	1.02	2	retire	xxxxxxxxxxx	2021-09-04	Heart center	21	xxxxxx	80		79	12.76	59.3	35.1	4.8	0.6	0.2	7.57	4.48	0.61	0.08	0.03	3.99	125	0.363	91	31	344
xxxxxxx	25744	xxx	Han	man	65	170	75	25.9516	5.38	5.65	2.14	4.35	1.11	3.07	159.26	4.9	89	337.4	126	107	1.08	0.95	1	farmer	xxxxxxxxxxx	2021-09-04	Heart center	9	xxxxxx	92		81	6.31	61.3	29	8.4	1.1	0.2	3.87	1.83	0.07	0.1	0.01	4.64	142	0.429	92.5	30.6	331
xxxxxxx	25759	xxx	Han	man	77	172	82	27.7177	5.43	5.84	3.89	4.93	1.02	3.37	375.27	5.6	100	353.7	143	68	1.02	1.1	5	retire	xxxxxxxxxxx	2021-09-04	Heart center	46	xxxxxx	102		64	7.33	67.1	25.5	5	2.3	0.1	4.92	1.87	1.37	0.17	0.01	5.19	159	0.478	92.1	30.6	333
xxxxxxx	25747	xxx	Han	man	50	165	63	23.1405	6.66	8.14	1.21	2.96	0.67	1.94	108.02	2.6	55	238	107	83	0.8	0.77	6		xxxxxxxxxxx	2021-09-04	Heart center	16	xxxxxx	73	b	80	6.81	65.9	27	5.3	1.5	0.3	4.49	1.84	0.36	0.1	0.02	4.69	1430	0.409	87.2	30.5	350
xxxxxxx	25712	xxx	Han	man	62	162	69	26.2917	5.14	5.86	2.22	4.46	1.11	2.72	122.91	4.8	79	443	200	100	1.32	1.03			xxxxxxxxxxx	2021-09-04	Heart center	36	xxxxxx			70	8.33	72.9	17.3	8.9	0.4	0.5	6.07	1.44	0.74	0.03	0.04	4.81	137	0.416	86.5	28.5	329
xxxxxxx	25778	xxx	Han	man	53	173	83	27.7323	4.69	5.62	0.73	3.37	1.16	2.03	60.72	6	70	422	160	120	1.14	0.79	6	civil servant	xxxxxxxxxxx	2021-09-05	Heart center	6	xxxxxx	85	a	80	6.35	44.9	46	5.5	3	0.6	2.85	2.92	0.35	0.19	0.04	4.53	142	0.435	96	31.3	326
xxxxxxx	25762	xxx	Han	man	61	176	92	29.7004	4.59	8.12	1.47	3.83	0.86	2.63	77	4.9	61	346	132	115	0.98	0.9	5	civil servant	xxxxxxxxxxx	2021-09-05	Heart center	10	xxxxxx	102		68	5.09	52.4	37.1	7.3	2.4	0.8	7.3	2.4	0.8	2.67	1.89	4.1	140	0.393	959	34.1	356
xxxxxxx	25788	xxx	Han	woman	54	167	83	29.7608	4.68	5.55	2.17	5.34	0.84	3.99	163.57	2.9	74	435	163	83	1.07	1.34	5	civil servant	xxxxxxxxxxx	2021-09-05	Heart center	38	xxxxxx	102		80	4.62	62.8	26.8	8.7	1.1	0.6	2.9	1.24	0.4	0.05	0.03	4.85	148	0.439	90.5	30.5	145
xxxxxxx	25792	xxx	Han	man	53	172	80	27.0416	5.08	5.57	3.35	4.68	1.32	2.72	84.9	4.6	85	380	143	88	1.63	0.98	3	worker	xxxxxxxxxxx	2021-09-05	Heart center	33	xxxxxx	92		71	7.59	63.5	25.6	6.5	4	0.4	4.82	1.94	0.49	0.3	0.03	4.64		93.5	0.43	30.6	327
xxxxxxx	25790	xxx	Uygur	man	60	169	62	21.7079	11.52	10.07	1.23	3.4	0.92	2.14	76.57	3.5	80	324	103	60	1	0.87	5	civil servant	xxxxxxxxxxx	2021-09-05	Heart center	16	xxxxxx	84		95	8.42	60.4	28.1	7.8	3	0.7	5.09	2.37	0.66	0.25	0.06	4.09	120	0.345	4.4	29.3	348
xxxxxxx	25784	xxx	Uygur	woman	50	159	61	24.1288	8.78	7.28	1.72	5.12	1.35	3.11	224.15	4.2	53	270.5	180	100	1.49	0.88	3	office worker	xxxxxxxxxxx	2021-09-06	Heart center	26	xxxxxx	89		88	6.3	59.4	33.5	5.9	0.6	0.6	3.74	2.11	0.37	0.04	0.04	4.4	125	0.38	86.4	28.4	329
xxxxxxx	25791	xxx	Uygur	man	62	174	84	27.7447	5.1	5.4	1.04	4	0.89	2.86	88.8	4.2	70	442	161	99	1.01	0.75	5	retire	xxxxxxxxxxx	2021-09-06	Heart center	17	xxxxxx	102		72	5.5	59.4	29.3	6.9	4	0.4	3.27	1.61	0.38	0.22	0.02	4.97	139	0.407	81.9	28	342
xxxxxxx	25796	xxx	Han	man	50	163	65	24.4646	4.9	4.55	1.12	3.11	0.97	1.43	51.29	4.53	63.03	348	102	60	1.07	0.43	7	civil servant	xxxxxxxxxxx	2021-09-06	Heart center	43	xxxxxx	80		62	7.6	64.5	27.2	5	2.8	0.5	4.9	2.07	0.38	0.21	0.04	4.72	138	0.408	86.4	29.2	338
xxxxxxx	25798	xxx	Han	man	71	174	80	26.4236	8.34	9.07	1.82	4.97	0.73	3.29	91	4.5	115	244	130	77	1.05	1.11	3	retire	xxxxxxxxxxx	2021-09-06	Heart center	23	xxxxxx	92		64	7.7	75.3	17.5	5.7	1	0.5	5.8	1.35	0.44	0.08	0.04	4.52	143	0.44	96.6	31.6	327
xxxxxxx	25838	xxx	Uygur	man	56	175	60	19.5918	6.02	4.99	1.38	2.96	0.77	1.75	96.75	4.7	74	281	181	111	1.03	0.71	6	policeman	xxxxxxxxxxx	2021-09-06	Heart center	17	xxxxxx	75		60	7.33	51.3	37.5	1.4	3.7	1.1	3.76	2.75	0.47	0.27	0.08	5	153	0.451	90.2	30.6	339
xxxxxxx	25904	xxx	Han	man	79	177	85	27.1314	6.55	5.43	1.86	3.02	0.86	1.86	255.19	4.8	70	432.2	180	95	1.2	0.57	4	retire	xxxxxxxxxxx	2021-09-07	Heart center	25	xxxxxx	89	O	78	4.3	64.3	20.9	10.5	3.7	0.6	2.76	0.9	0.45	0.16	0.03	3.86	124	0.37	95.6	32	334
xxxxxxx	25842	xxx	Han	woman	80	161	74	28.5483	10.26	8.5	2.84	5.12	0.67	3.52	191.59	9.63	83.49	263.17	145	52	1.04	1.09	2	retire	xxxxxxxxxxx	2021-09-08	Heart center	16	xxxxxx			74	12.35	62.3	24	10.5	2.1	0.2	7.81	2.96	1.3	0.26	0.02	3.8	106	0.325	85.5	27.9	326
xxxxxxx	25811	xxx	Han	man	47	162	70	26.6728	8.09	7.54	1.51	5.76	1.22	3.94	219.38	5.1	63	337.4			1.26	1.13	2	driver	xxxxxxxxxxx	2021-09-09	Heart center	29	xxxxxx	86		77	12.89	54.5	38.6	6	0.2	0.7	7.03	4.98	0.77	0.03	0.09	5.28	164	0.489	92.6	31.1	335
xxxxxxx	25897	xxx	Han	man	61	175	75	24.4898	4.77	5.33	3.7	4.65	0.94	2.9	34.57	7.7	93	403	115	60	1.29	1.09	5	retire	xxxxxxxxxxx	2021-09-09	Heart center	6	xxxxxx	98	A	80	6.09	54.8	39.9	4.4	0.7	0.2	3.34	2.43	0.27	0.04	0.01	4.67	154	0.437	93.6	33	352
xxxxxxx	25955	xxx	Han	man	59	156	54	22.1893	9.49	7.73	2.15	3.36	1.31	2.14	150.93	7.9	99	390.9	165	95	1.16	0.58	1	driver	xxxxxxxxxxx	2021-09-12	Heart center	16	xxxxxx	76		102	11.44	63.8	26.9	7	1.5	0.8	7.3	3.08	0.8	0.17	0.09	4.92	145	0.424	86.2	29.5	342
xxxxxxx	25816	xxx	Uygur	man	52	160	70	27.3437	6.23	5.63	4.47	4.73	0.97	3.21	392.21	4.2	80	328.6	126	82	0.93	0.96	2	farmer	xxxxxxxxxxx	2021-09-12	Heart center	27	xxxxxx	108	-	82	10.71	64.4	29.8	7.3	0.4	0.1	6.68	3.19	0.78	0.04	0.01	4.96	114	0.37	74.6	23	308
xxxxxxx	25938	xxx	Uygur	man	63	177	81	25.8546	5.57	5.63	1.02	3.85	0.88	2.87	37.6	4.4	92	408	170	110	1.11	1	3	office worker	xxxxxxxxxxx	2021-09-13	Heart center	34	xxxxxx	100	A	79	8.22	60.2	27.9	9.4	1.5	1	4.95	2.39	0.77	0.12	0.08	5	147	0.431	86.2	29.4	341
xxxxxxx	25894	xxx	Han	man	39	167	58	20.7967	4.74	5.4	0.86	3.86	1.02	2.68	135.28	6.4	77	286	118	75	1.08	0.9	6	office worker	xxxxxxxxxxx	2021-09-13	Heart center	44	xxxxxx	74	B	80	5.63	60	30.4	7.6	1.8	0.2	3.38	1.71	0.43	0.1	0.01	5.05	150	0.448	88.7	29.7	335
xxxxxxx	25914	xxx	Uygur	man	44	176	88	28.4091	4.66	5.53	2.77	5.03	1.54	3.71	131.86	4.9	91	439.9	120	81	1.33	1.07	1	farmer	xxxxxxxxxxx	2021-09-14	Heart center	9	xxxxxx	84		85	8.93	40.5	45.1	8.7	4.6	1.1	3.62	4.03	0.78	0.41	0.1	4.98	149	0.429	86.1	29.9	347
xxxxxxx	25960	xxx	Han	man	73	168	76	26.9274	17.75	7.77	0.67	3.44	1.39	2.4	229.7	6.4	117	347.3	120	80	1.27	0.66	4	retire	xxxxxxxxxxx	2021-09-16	Heart center	16	xxxxxx	75		60	5.03	70.1	20.7	7.2	1.8	0.2	3.53	1.04	0.36	0.09	0.01	5.48	160	0.485	88.5	29.2	330
xxxxxxx	25946	xxx	Han	woman	77	155	65	27.0552	6.17	7.8	2.2	3.98	0.69	2.8	148.76	4.2	52	344	150	80	1.01	1.02	1	retire	xxxxxxxxxxx	2021-09-20	Heart center	19	xxxxxx	94	B	90	7.31	82.5	14.6	1.4	1	0.5	6.03	1.07	0.1	0.07	0.04	4.15	127	0.377	90.8	30.6	337
xxxxxxx	26041	xxx	Han	woman	52	164	63	23.4236	4.77	4.91	0.92	3.99	1.24	3.43	93.42	2.33	50.92	215	116	65	2.31	1.53			xxxxxxxxxxx	2021-10-03	Heart center	39	xxxxxx			78	5	50.8	31.6	7.4	9.3	0.9	2.54	1.58	0.37	0.47	0.05	3.83	117	0.348	90.8	30.5	336
xxxxxxx	26040	xxx	Uygur	man	66	170	72	24.9135	10.4	7.88	6.41	7.14	1.09	5.3	340.71	3.8	55	365.1	140	80	1.29	1.57	4	retire	xxxxxxxxxxx	2021-10-03	Heart center	6	xxxxxx			79	4.5	66.2	25.9	6.3	1.1	0.5	2.98	1.17	0.28	0.05	0.02	4.42	139	0.412	93	31.4	338
xxxxxxx	26138	xxx	Han	man	84	165	92	33.7925	8.59	7.46	1.82	2.95	0.72	2	283.25	6.1	67	338.8	180	90	0.99	0.57	5	retire	xxxxxxxxxxx	2021-10-04	Heart center	4	xxxxxx	102	B	65	5.18	52	37.6	6.9	2.5	1	2.69	1.95	0.36	0.13	0.05	4.54	148	0.449	98.9	32.6	330
xxxxxxx	26044	xxx	Han	man	57	178	80	25.2493	19.9	9.22	2.85	4.59	0.79	2.71	173.29	5.8	76.11	187.2			1.12	0.92	5	retire	xxxxxxxxxxx	2021-10-04	Heart center	21	xxxxxx	111	O		7.5	62.4	25.2	5.1	2	0.3	5.05	1.89	0.38	0.15	0.02	5.03	155	0.454	90.3	30.9	342
xxxxxxx	26110	xxx	Han	woman	75	162	70	26.6728	4.64	5.45	1.54	4.29	1.61	2.42	200	5.28	61.11	375.77	122	75	1.66	0.65	2	not in detail	xxxxxxxxxxx	2021-10-05	Heart center	34	xxxxxx	92		75	10.89	48.7	43.5	5.1	2.1	0.6	5.3	4.74	0.56	0.23	0.07	4.07	131	0.391	96.8	32.4	335
xxxxxxx	26063	xxx	Han	woman	77	150	50	22.2222	7.89	7.96	1.63	3.47	1.25	2.3	375.2	2.4	81	251.2	180	110	1.14	0.61	1	retire	xxxxxxxxxxx	2021-10-06	Heart center	6	xxxxxx	78	A	79	10.15	87.3	7.6	4.8	0.2	0.1	8.66	0.77	0.49	0.02	0.01	4.39	139	0.416	94.8	31.7	334
xxxxxxx	26135	xxx	Han	man	80	173	78	26.0617	14.93	8.19	0.65	2.34	1.18	1.31	118.54	7.3	104	287.9	160	110	1.09	1.29	3	retire	xxxxxxxxxxx	2021-10-06	Heart center	7	xxxxxx	92	O	80	6.02	59.7	28.7	6.6	4.7	0.3	3.59	1.72	0.4	0.28	0.02	4.26	127	0.381	89.4	29.8	333
xxxxxxx	26107	xxx	Han	man	53	176	76	24.5351	3.99	5.39	0.84	2.34	0.82	1.4	70.58	6.6	68	349			1.08	0.55	5	worker	xxxxxxxxxxx	2021-10-06	Heart center	31	xxxxxx	105	O	77	5.08	55.3	35	6.7	2.6	0.4	2.81	1.78	0.34	0.13	0.02	4.87	147	0.441	90.6	30.2	333
xxxxxxx	26075	xxx	Han	woman	78	155	61	25.3902	7.33	8.3	2.05	3.31	0.86	1.9	30.35	5.7	60	198	136	62	1.24	0.64	2	retire	xxxxxxxxxxx	2021-10-06	Heart center	36	xxxxxx	72		61	6.61	57.1	32.1	9.4	1.2	0.2	3.77	2.12	0.62	0.08	0.01	3.94	123	0.361	91.6	31.2	341
xxxxxxx	26113	xxx	Han	man	72	170	68	23.5294	5.42	5.39	1.59	2.91	1.31	1.76	174.12	6.1	101	419.4	135	60	1.25	0.53	4	retire	xxxxxxxxxxx	2021-10-07	Heart center	44	xxxxxx	85	O	64	9.9	77.3	13	6.4	3.1	0.2	7.65	1.29	0.63	0.31	0.02	4.87	154	0.447	91.8	31.6	345
xxxxxxx	26106	xxx	Han	woman	61	171	84	28.7268	5.19	5.52	1.86	4.22	1.44	2.79	271.5	4.9	82	469.1			0.39	0.85	5	teacher	xxxxxxxxxxx	2021-10-07	Heart center	11	xxxxxx	84	B	65	7.8	51.4	37.6	5.9	4.4	0.7	3.64	2.66	0.42	0.31	0.05	4.87	145	0.437	89.7	29.8	332
xxxxxxx	26067	xxx	Han	man	64	170	70	24.2215	14.8	8.19	2	4.99	1	2.77	220.53	3.61	81	375			1.44	0.93	5	retire	xxxxxxxxxxx	2021-10-07	Heart center	18	xxxxxx	84	O	62	5.58	60.1	22.6	8.6	1.8	0.9	3.69	1.26	0.48	0.1	0.05	5.15	156	0.451	87.6	30.3	346
xxxxxxx	26111	xxx	Han	man	58	178	85	26.8274	7.15	7.58	1.62	5.69	1.41	4.09	208.72	6	87	420.6	190	120	1.29	1.23	3	farmer	xxxxxxxxxxx	2021-10-07	Heart center	52	xxxxxx	95	B	89
xxxxxxx	26100	xxx	Han	man	66	165	65	23.8751	4.22	5.74	2.19	3.46	1.07	1.85	88.78	6.1	115	602	180	120	1.31	0.68	4		xxxxxxxxxxx	2021-10-08	Heart center	17	xxxxxx	102	A	79	6.85	48.3	36.1	8.3	6.7	0.6	3.31	2.49	0.57	0.46	0.04	4.92	159	1.469	95.3	32.3	339
xxxxxxx	26130	xxx	Uygur	woman	67	162	69	26.2917	8.86	8.55	1.22	2.68	0.95	1.41	401.01	5.2	51	229	180	100	1.14	0.52	4	retire	xxxxxxxxxxx	2021-10-09	Heart center	30	xxxxxx	100	O	83	5.58	58	27.4	9.3	4.8	0.5	3.24	1.53	0.52	0.27	0.03	4.4	129	0.413	93.9	29.3	312
xxxxxxx	26154	xxx	Han	man	53	172	82	27.7177	5.59	5.5	1.03	3.22	1.6	1.62	126.71	7.2	72	378	190	120	1.53	0.62	6	office worker	xxxxxxxxxxx	2021-10-10	Heart center	50	xxxxxx	89	O	76	8.83	50.7	34.9	10.8	3.4	0.2	4.48	3.08	0.95	0.3	0.02	4.66	150	0.45	96.6	32.2	333
xxxxxxx	26141	xxx	Han	man	63	177	67	21.3859	5.48	5.23	1.63	4.56	0.83	3.29	197.14	5	65	362	150	90	1.06	1.08	2	retire	xxxxxxxxxxx	2021-10-10	Heart center	24	xxxxxx	89	B	72	5.42	50.9	28.8	12.5	7.6	0.2	2.76	1.56	0.68	0.41	0.01	5	141	0.441	88.2	28.2	320
xxxxxxx	26144	xxx	Han	man	60	174	95	31.378	7.52	7.05	1.82	5.65	0.85	3.59	403.01	10.26	154.62	430	210	120	1.25	1.09	3	retire	xxxxxxxxxxx	2021-10-12	Heart center	31	xxxxxx	107	O	76	5.26	77	14.4	7.4	0.8	0.4	4.05	0.76	0.39	0.04	0.02	4.62	133	0.411	89	28.8	324
xxxxxxx	26441	xxx	Han	man	43	159	65	25.711	9.62	8.12	5.13	6.88	0.93	5.05	279.34	6.2	79	405.7	160	90	1.23	1.67	3	office worker	xxxxxxxxxxx	2021-10-20	Heart center	20	xxxxxx	68		61	14.93	69.6	25.5	4.3	0.3	0.3	10.39	3.81	0.64	0.04	0.04	4.84	143	0.422	87.2	29.5	339
xxxxxxx	26469	xxx	Han	woman	48	163	57	21.4536	9.8	7.19	1.02	5.69	1.47	3.14	433.82	50.44	233.15	6.91		125	1.57	0.99	3	driver	xxxxxxxxxxx	2021-10-22	Heart center	29	xxxxxx	93		0	8.37	12	3.6	0.3	0.4	7.89	1.13	0.34	0.03	0.04	5.35	142	0.444	83	26.5	320	12.8
xxxxxxx	26439	xxx	Han	man	59	168	72	25.5102	3.77	5.38	6.63	4.97	0.77	2	131.09	5.8	72	341	200	110	1.24	0.86	3	retire	xxxxxxxxxxx	2021-10-23	Heart center	34	xxxxxx	81		830	9.29	53.9	36.1	6.8	3.1	0.1	5.01	3.35	0.63	0.29	0.01	5.05	157	0.493	97.6	31.1	318
xxxxxxx	26446	xxx	Uygur	woman	63	168	85	30.1162	5.64	5.82	6.89	7.94	0.84	4.2	169.53	7.5	60	397	148	82	1.07	0.86	3	farmer	xxxxxxxxxxx	2021-10-24	Heart center	13	xxxxxx	90	-	83	6.72	54	33	4	8.6	0.4	3.63	2.22	0.27	0.58	0.03	4.12	123	0.383	93	29.9	321
xxxxxxx	26415	xxx	Han	woman	72	160	75	29.2969	6.82	5.55	1.79	3.3	1.15	2.1	346.54	4.5	66	300	180	90	1.5	0.69	1	farmer	xxxxxxxxxxx	2021-10-24	Heart center	30	xxxxxx	78		81	6.5	72.2	17.1	6.1	4.1	0.5	4.69	1.11	0.4	0.27	0.03	4.4	133	0.402	91.3	30.3	331
xxxxxxx	26488	xxx	Han	man	66	165	82	30.1194	4.74	5.67	3.67	5.18	0.94	3.1	113.08	6.8	98	453	115	65	1.1	1.28	2	retire	xxxxxxxxxxx	2021-10-24	Heart center	8	xxxxxx	102		78	8.03	60.3	33.9	4.5	1.2	0.1	4.84	2.72	0.36	0.1	0.01	4.61	15	0.461	100	32.5	325
xxxxxxx	26496	xxx	Han	man	60	168	76	26.9274	2.73	6.65	2.6	4.85	1.47	3.12	7.3	60	375	7.12	74		0.65	95.66	2	retire	xxxxxxxxxxx	2021-10-24	Heart center	50	xxxxxx	96	108	0	7.65	14.1	6.6	2	0.8	12.35	2.28	1.07	0.32	0.13	5.61	159	0.473	84.3	28.3	336	12.7
xxxxxxx	26427	xxx	Han	man	57	178	81	25.565	12.13	8.13	2.46	3.09	0.84	2.16	280.53	4.8	66	210.1	111	61	1.33	0.61	3	office worker	xxxxxxxxxxx	2021-10-24	Heart center	25	xxxxxx	84		62	6.62	60.9	29.6	7.6	1.4	0.5	4.03	1.96	0.5	0.09	0.03	4.79	147	0.413	86.2	30.7	356
xxxxxxx	26467	xxx	Uygur	man	37	168	57	20.1956	2.22	5.16	3.77	4.06	2.76	1.11	8.2	90	402.5	4.22	84		0.84	370.65	5	office worker	xxxxxxxxxxx	2021-10-24	Heart center	31	xxxxxx	87	118	0	6.16	30	6.2	2.1	0.1	4.6	2.24	0.46	0.16	0.01	4.64	142	0.428	92.2	30.6	332	13
xxxxxxx	26418	xxx	Han	man	60	179	85	26.5285	6.97	5.56	2.05	2.74	0.79	1.34	63.4	5.3	74	371	220	110	1.07	0.56	5	retire	xxxxxxxxxxx	2021-10-25	Heart center	3	xxxxxx	83		75	4.76	59.4	28.5	5.5	6.5	0.1	2.83	1.36	0.26	0.31	0	4.38	136	0.402	91.8	31.1	338
xxxxxxx	26454	xxx	Han	woman	61	155	57	23.7253	5.01	5.94	1.21	4.16	1.03	2.85	84.94	3.5	55	267	123	68	1.09	0.89	3	retire	xxxxxxxxxxx	2021-10-25	Heart center	26	xxxxxx	72		78	4.4	40.8	41.7	5.8	9.99	0.6	1.8	1.83	0.26	0.49	0.03	3.59	115	0.355	98.7	32.1	325
xxxxxxx	26450	xxx	Han	man	77	172	62	20.9573	5.44	5.32	0.67	6.29	1.64	4.48	385.47	9.5	94	316	98	60	1.52	1.23	2	retire	xxxxxxxxxxx	2021-10-25	Heart center	21	xxxxxx	82	0	82	7.9	79.7	14.2	5.1	0.4	0.6	6.3	1.12	0.4	0.03	0.05	4.37	146	0.439	100.4	33.4	332
xxxxxxx	26440	xxx	Han	man	59	170	73	25.2595	4.33	5.33	1.45	3.23	1.05	1.76	108.32	3.6	78	289	135	84	1.31	0.7	5	retire	xxxxxxxxxxx	2021-10-25	Heart center	51	xxxxxx	78		74	6.51	57.5	35.5	5.5	1.2	0.3	3.74	2.31	0.36	0.08	0.02	4.67	149	0.454	97.2	31.9	328
xxxxxxx	26414	xxx	Han	man	49	175	84	27.4286	4.27	3.56	0.95	3.08	0.92	1.95	104.17	4.2	69	339	130	78	1.07	0.7	3		xxxxxxxxxxx	2021-10-25	Heart center	9	xxxxxx	75		70	8.6	56.8	30.8	8.5	3.3	0.6	4.88	2.65	0.73	0.28	0.05	4.68	143	0.445	95.1	30.6	321
xxxxxxx	26426	xxx	Han	man	75	160	65	25.3906	4.6	5.45	1.25	3.24	0.96	1.97	795.31	5.5	89	316	119	67	1.01	0.78	3	retire	xxxxxxxxxxx	2021-10-25	Heart center	37	xxxxxx	84		67	4.6	59.1	31.3	7.2	2.4	0.2	2.72	1.43	0.33	0.11	0.01	4.22	138	0.413	97.9	32.7	334
xxxxxxx	26484	xxx	Han	woman	81	158	91	36.4525	2.22	4.2	4.55	4.12	0.98	3.1	5.1	97	425	5.14	80		1.07	205.36	1	retire	xxxxxxxxxxx	2021-10-27	Heart center	20	xxxxxx		130	0	6.1	27	7.2	4.1	0.2	2.58	1.13	0.3	0.17	0.01	4.12	132	0.412	100	32	320	12.9
xxxxxxx	26492	xxx	Han	woman	60	166	91	33.0237	2.29	7.06	3.57	4.635	1.02	3.41	13.72	57	296.1	4.64	90	102	0.64	229.67	6	retire	xxxxxxxxxxx	2021-10-27	Heart center	37	xxxxxx		140	0	6.21	31.2	5.4	0.9	0.4	3.36	1.69	0.29	0.05	0.02	4.37	125	0.376	86	28.6	332	12.3
xxxxxxx	26482	xxx	Han	man	77	179	96	29.9616	4.66	4.78	2.01	3.69	0.65	2.54	73.32	110	434	4.66	74				2	retire	xxxxxxxxxxx	2021-10-27	Heart center	46	xxxxxx		142	0	7.04	20	5.6	3.1	0.9	5.49	1.56	0.44	0.24	0.07	5.63	157	0.489	86.9	27.9	321	12.9
xxxxxxx	26481	xxx	Han	woman	45	180	83	25.6173	2.55	3.88	3.72	3.63	1.96	1.47	5.9	57	187	4.77	68		0.65	63.11	2		xxxxxxxxxxx	2021-10-28	Heart center	22	xxxxxx		110	0	5.97	29.1	10.1	0.8	0.3	2.2	1.07	0.37	0.03	0.01	4.222	137	0.41	97.2	32.5	334	12.7
xxxxxxx	26495	xxx	Han	man	38	180	90	27.7778	5.15	5.51	0.84	2.84	1.23	1.99	401.12	76	429.8	4.8	76				4		xxxxxxxxxxx	2021-10-29	Heart center	13	xxxxxx	98	118	0	8.14	14.9	2.3	0.8	0.6	8.81	1.61	0.25	0.09	0.06	5.13	151	0.461	89.9	29.4	328	11.9
xxxxxxx	26473	xxx	Han	man	58	174	95	31.378	4.64	4.7	1.52	2.95	0.93	2.06	143.64	56	337	4.77	84		0.74	35.55	2	retire	xxxxxxxxxxx	2021-10-29	Heart center	20	xxxxxx		126	0	5.95	28.3	5.4	6.3	0.5	4.71	2.24	0.43	0.5	0.04	5.3	151	0.478	90.2	28.5	316	13
xxxxxxx	26493	xxx	Han	man	49	175	103	33.6327	6.23	5.23	3.09	3.64	0.85	2.58	482.3	88.26	423	5.78	72		0.84	0.64	3	driver	xxxxxxxxxxx	2021-10-29	Heart center	7	xxxxxx		110	0	6.03	27.8	9.9	1.1	0.9	4.2	1.94	0.69	0.08	0.06	5.5	157	0.481	87.5	28.5	326	12.8
xxxxxxx	22306	xxx	Han	man	69	159	60	23.7332	4.01	5.47	1.56	3.71	1	2.17	0.71	5.8	80	403	123	69	1.19	0.78	2	retire	xxxxxxxxxxx	2021-10-31	Heart center	36	xxxxxx	89		72	6.29	70.6	17.8	8.1	3.2	0.3	4.44	1.12	0.51	0.2	0.02	4.09	137	0.401	98	33.5	342
xxxxxxx	26587	xxx	Han	man	55	172	76	25.6896	4.56	5.48	2.05	4.03	1.17	2.3	149	4.27	69.69	574.62	145	85	1.17	0.59		worker	xxxxxxxxxxx	2021-10-31	Heart center	44	xxxxxx	76		90	8	62.5	29.4	6.9	0.6	0.6	5	2.35	0.55	0.05	0.05	4.91	163	0.476	96.9	33.2	342
xxxxxxx	22297	xxx	Han	woman	67	162	69	26.2917	5.13	5.97	2.58	5.86	1.04	4.11	218.94	3.59	46.7	258	160	80	1.13	1.18	1	not in detail	xxxxxxxxxxx	2021-11-01	Heart center	50	xxxxxx	86		85	7.838	0.4	12.4	2.7	0.1	0.4	6.61	0.97	0.21	0.01	0.03	4.48	131	0.407	90.8	29.2	322
xxxxxxx	26613	xxx	Uygur	man	69	168	85	30.1162	6.71	8.13	1.73	4.54	1.17	2.75	556.89	5.2	86	305	145	68	1.31	0.84		retire	xxxxxxxxxxx	2021-11-01	Heart center	14	xxxxxx	80		74	6.25	56.7	34.6	5.6	2.9	0.2	3.54	2.16	0.35	0.18	0.01	5.88	179	0.552	93.9	30.4	324
xxxxxxx	26605	xxx	Uygur	man	55	176	102	32.9287	4.83	5.37	2.35	3.4	0.8	2.32	223.52	6	106	415.9	101	71	1.01	0.71	4	civil servant	xxxxxxxxxxx	2021-11-01	Heart center	19	xxxxxx	92			7.72	48.4	42.7	6.2	2.3	0.4	3.74	3.3	0.48	0.18	0.03	5.19	160	0.45	86.7	30.8	356
xxxxxxx	26606	xxx	Han	man	74	160	61	23.8281	5.93	4.99	1.85	4.1	1.53	2.65	192.66	6.32	66.56	305	132	81	1.84	0.78	1	retire	xxxxxxxxxxx	2021-11-01	Heart center	44	xxxxxx	75		61	6.25	79.8	13.3	5.8	0.7	0.4	5.39	0.9	0.39	0.05	0.03	5.16	168	0.509	98.6	32.6	330
xxxxxxx	26594	xxx	Han	man	79	170	77	26.6436	11.64	7.39	1.17	3.53	1.04	1.99	49.4	5.8	65	332.8	150	80	1.23	0.55	0	retire	xxxxxxxxxxx	2021-11-01	Heart center	18	xxxxxx	78		77	7.83	90.7	8	0.8	0.1	0.4	7.1	0.63	0.06	0.01	0.03	4.02	134	0.388	96.5	33.3	345
xxxxxxx	26595	xxx	Uygur	man	48	176	86	27.7634	4.5	8.37	1.4	3.32	0.88	1.89	125.9	9.4	113	576			1.22	0.69	2	worker	xxxxxxxxxxx	2021-11-01	Heart center	6	xxxxxx	110	-	78	10.26	62.8	26.1	8.2	2.3	0.6	6.44	2.68	0.84	0.24	0.06	4.44	128	0.399	89.9	28.8	321
xxxxxxx	22296	xxx	Han	woman	56	164	57	21.1927	4.47	5.68	0.35	2.6	1.1	1.31	0.2	5.2	51	132	147	88	1.14	0.51	3		xxxxxxxxxxx	2021-11-02	Heart center	43	xxxxxx	86		80	5.31	50.3	43.5	4.7	1.3	0.2	2.67	2.31	0.25	0.07	0.01	3.61	116	0.348	96.4	32	333
xxxxxxx	26607	xxx	Han	man	51	172	82	27.7177	3.37	5.37	1.4	2.87	0.78	1.54	103.41	5.1	68	385			1.04	0.62	5	civil servant	xxxxxxxxxxx	2021-11-02	Heart center	8	xxxxxx	84		80	6.8	52.5	31.8	9	6.3	0.4	3.57	2.16	0.61	0.43	0.03	4.9	159	0.487	99.4	32.4	326
xxxxxxx	26591	xxx	Han	woman	55	160	57	22.2656	4.65	5.46	0.9	3.17	1.16	1.71	395.09	5.1	65	291			1.24	0.57	5	retire	xxxxxxxxxxx	2021-11-02	Heart center	21	xxxxxx	65		70	4.69	64	27.6	5.3	2.9	0.2	3.13	1.35	0.26	0.14	0.01	4.06	116	0.374	92.1	28.6	310
xxxxxxx	26597	xxx	Han	man	51	182	96	28.982	7.97	8.85	1.58	4.48	0.66	3.28	56.22	2.8	81	373	130	90	0.98	0.96	5	office worker	xxxxxxxxxxx	2021-11-02	Heart center	39	xxxxxx	110	-	80	5.93	61.6	31.5	5.2	1.5	0.2	3.65	1.87	0.31	0.09	0.01	5.06	159	0.47	92.9	31.4	338
xxxxxxx	26608	xxx	Han	man	66	176	82	26.4721	4.51	5.44	1.03	3.7	0.88	2.29	151.7	4.6	71	329			1.1	0.71	3	retire	xxxxxxxxxxx	2021-11-02	Heart center	33	xxxxxx	83		80	6.94	57.2	30.4	5.8	6.5	0.1	3.97	2.11	0.4	0.45	0.01	4.72	145	0.432	91.5	30.7	336
xxxxxxx	26601	xxx	Han	man	67	168	74	26.2188	5.37	5.18	0.59	3.21	1.04	2.12	7.2	4.62	74.43	350.2			1.02	0.49	3	retire	xxxxxxxxxxx	2021-11-03	Heart center	35	xxxxxx	112	-	68	6.5	81.1	16.4	1.3	0.9	0.3	5.27	1.07	0.08	0.06	0.02	5.07	157	0.476	94	31	330
xxxxxxx	26603	xxx	Han	man	58	170	74	25.6055	4.58	5.11	1.52	3.14	1.02	1.91	116	5.53	86.66	331.13	121	66	1.09	0.5	3	retire	xxxxxxxxxxx	2021-11-03	Heart center	33	xxxxxx	102	-	76	7.27	60	30.4	7.2	2.1	0.3	4.36	2.21	0.52	0.15	0.02	4.56	142	0.425	93.2	31.1	334
xxxxxxx	26038	xxx	Han	woman	47	158	70	28.0404	5.33	5.37	0.78	6.14	1.67	4.47	84.58	4.1	63	174.2	160	90	1.25	1.25	3		xxxxxxxxxxx	2021-11-03	Heart center	26	xxxxxx	74	A	96	8.23	74.6	16.5	6.7	1.3	0.9	6.14	1.36	0.55	0.11	0.07	4.89	111	0.37	75.7	22.7	300
xxxxxxx	26610	xxx	Han	man	61	180	96	29.6296	6.13	10.63	1.55	4.56	1.21	3.23	114.12	7.1	87	259.4			1.14	1.02	4	retire	xxxxxxxxxxx	2021-11-03	Heart center	29	xxxxxx	87		73	6.08	61.2	30.1	6.7	1.5	0.5	3.72	1.83	0.41	0.09	0.03	5.05	154	0.462	91.5	30.5	333
xxxxxxx	26593	xxx	Uygur	man	46	175	80	26.1224	4.42	5.23	1.52	3.51	0.67	2.23	74.81	6.5	76	449	112	66	0.88	0.75			xxxxxxxxxxx	2021-11-03	Heart center	19	xxxxxx	75		81	5.02	49.6	40.8	6.2	3.2	0.2	2.49	2.05	0.31	0.16	0.01	4.82	135	0.411	85.3	28	328
xxxxxxx	26588	xxx	Han	man	54	165	61	22.4059	7.71	7.71	1.45	4.11	0.91	3.06	139.76	4.1	68	273.4			0.88	0.92	5	cook	xxxxxxxxxxx	2021-11-03	Heart center	11	xxxxxx	73		74	3.7	54.9	39.7	2.7	2.4	0.3	2.03	1.47	0.1	0.09	0.01	4.58	143	0.418	91.3	31.2	342
xxxxxxx	26609	xxx	Han	man	52	172	81	27.3797	10.52	7.46	0.82	2.6	1.24	1.63	187.17	3.1	73	239.5			1.1	0.47	3		xxxxxxxxxxx	2021-11-03	Heart center	4	xxxxxx	95	-	81	13.38	85.3	11.6	3	0	0.1	11.41	1.55	0.4	0	0.01	1.59	461		89.5	30.9	345
xxxxxxx	26602	xxx	Han	woman	53	160	66	25.7812	4.77	5.32	1.86	5.87	1.3	4.36	341.46	4.5	101	468.8			0.92	1.27	4	retire	xxxxxxxxxxx	2021-11-03	Heart center	26	xxxxxx	70		100	5.86	66.7	29.2	3.1	0.7	0.3	3.91	1.71	0.18	0.04	0.02	4.42	140	0.433	98	31.7	323
xxxxxxx	25761	xxx	Han	man	56	168	68	24.093	4.03	5.36	1.23	2.46	1.18	1.46	198	5.6	98	328	143	93	1.29	0.48	3	civil servant	xxxxxxxxxxx	2021-11-04	Heart center	28	xxxxxx	86		72	9.8	59.1	32.4	6.3	1.3	0.9	5.79	3.18	0.62	0.13	0.09	5.36	76	0.198	92.9	32.8	253
xxxxxxx	26585	xxx	Uygur	man	53	171	71	24.281	6.42	7.83	1.47	4.05	0.88	2.74	335.2	6.9	67	287	105	62	1.05	0.8	5	office worker	xxxxxxxxxxx	2021-11-04	Heart center	14	xxxxxx	98	-	66	5.69	55	29.5	13	2.1	0.4	3	3.13	1.68	0.74	0.12	4.49	141	0.422	94	31.4	334
xxxxxxx	26807	xxx	Han	man	53	174	93	30.7174	7.18	8.16	4.33	4.62	1	3	259.62	3.4	87	340.8	165	105	1.06	1.07	5		xxxxxxxxxxx	2021-11-14	Heart center	18	xxxxxx	96		78	5.16	62.4	28.1	6.8	2.5	0.2	3.22	1.45	0.35	0.13	0.01	4.45	136	0.431	96.9	30.6	316
xxxxxxx	26810	xxx	Han	man	61	174	87	28.7356	4.54	5.6	1.06	4.64	1.41	3.14	227.18	4.5	100	380	150	105	1.42	0.88	6	office worker	xxxxxxxxxxx	2021-11-14	Heart center	25	xxxxxx	93		73	4.16	62.1	28.8	6	2.9	0.2	2.58	1.2	0.25	0.12	0.01	5.04	156	0.444	88.1	31	351
xxxxxxx	26803	xxx	Han	man	55	160	68	26.5625	14.81	8.24	2.09	3.95	1.09	3.53	423.38	11.8	76	259.5	120	78	1.47	0.86	3	farmer	xxxxxxxxxxx	2021-11-16	Heart center	28	xxxxxx	82	O	79	8.3	57.3	33.9	6.5	2.1	0.2	4.76	2.81	0.54	0.17	0.02	5	153	10.25	30.6	29.8	123
xxxxxxx	26944	xxx	Uygur	man	60	162	82	31.2452	11.61	8.26	1.47	5.64	1.82	4.11	244.37	6.3	72	279.7	139	73	1.74	1.14	4	operate者	xxxxxxxxxxx	2021-11-18	Heart center	15	xxxxxx	95		81	8.82	63.2	22.6	11.1	2.3	0.8	5.57	1.99	0.98	0.2	0.07	5.1	156	0.46	90.4	30.6	338
xxxxxxx	27014	xxx	Han	woman	57	160	58	22.6562	7.59	7.28	1.73	6.43	1.08	5.1	147.92	6.4	66	411.5	180	130	1.38	1.33	2		xxxxxxxxxxx	2021-11-20	Heart center	5	xxxxxx			80	8.27	89	9.9	0.5	0.2	0.4	7.36	0.82	0.04	0.02	0.03	4.15	115	0.37	88	27.7	315
xxxxxxx	26957	xxx	Uygur	man	65	165	80	29.3848	5.17	4.49	0.88	4.69	0.99	2.95	244.14	6.84	72.19	263	180	100	1.12	0.94	3	farmer	xxxxxxxxxxx	2021-11-21	Heart center	40	xxxxxx	93		71	5.1	60	28.6	8.4	2.4	0.6	3.06	1.46	0.43	0.12	0.03	4.27	124	0.4	93	29	312
xxxxxxx	26950	xxx	Han	man	43	172	91	30.7599	6.01	5.49	3.78	5.69	0.75	3.49	84.65	5.9	80	417			1.23	1.25	2	farmer	xxxxxxxxxxx	2021-11-21	Heart center	25	xxxxxx	85		75	7.45	63.7	26.8	6.8	2.6	0.1	4.75	2	0.51	0.19	0.01	5.02	154	0.453	90.2	30.7	340
xxxxxxx	26967	xxx	Han	man	74	165	69	25.3444	11.11	8.27	2.92	4.53	0.83	2.76	104.86	5.8	68	260	140	63	1.37	0.97	2	retire	xxxxxxxxxxx	2021-11-21	Heart center	14	xxxxxx	87		81	6.99	48.7	43.1	5.3	2.3	0.6	3.4	3.01	0.37	0.16	0.04	4.16	129	0.393	94.5	31	328
xxxxxxx	26947	xxx	Han	man	46	169	73	25.5593	4.11	7.72	2.62	4.59	1.38	3.33	277.88	4.1	103	341			1.24	0.96	3		xxxxxxxxxxx	2021-11-21	Heart center	23	xxxxxx	78		98	11.07	67.5	22.3	7	2.6	0.6	7.47	2.47	0.77	0.29	0.07	4.48	145	0.44	97.1	32.4	333
xxxxxxx	26959	xxx	Han	woman	41	164	64	23.7954	3.93	5.17	1.42	4.56	0.98	2.99	62.66	4.6	47	245	103	64	1.18	0.92	5		xxxxxxxxxxx	2021-11-22	Heart center	12	xxxxxx	72		82	6.6	57.7	32.7	7.7	1.7	0.2	3.81	2.16	0.51	0.11	0.01	3.98	124	0.372	93.5	31.2	333
xxxxxxx	26974	xxx	Han	man	46	170	76	26.2976	4.62	5.49	4.82	5.58	1	3.9	634.81	6.4	80	422.1	101	69	0.76	0.9	2	farmer	xxxxxxxxxxx	2021-11-23	Heart center	48	xxxxxx	83		77	7.28	52.8	39.6	4.7	2.6	0.3	3.84	2.88	0.34	0.19	0.02	4.86	149	0.458	94.2	30.7	325
xxxxxxx	26975	xxx	Han	woman	54	163	65	24.4646	6.36	5.24	3.73	4.81	0.75	2.61	217.62	4.22	67.72	342.3	160	90	1.05	0.89	1	not in detail	xxxxxxxxxxx	2021-11-23	Heart center	29	xxxxxx	75		84	4.09	65.3	26.4	4.6	3.2	0.5	2.67	1.08	0.19	0.13	0.02	3.9	116	0.36	92.8	29.7	320
xxxxxxx	26953	xxx	Han	man	41	172	79	26.7036	4.94	5.39	1.21	3.52	0.87	2.25	51.77	3.7	72	332	160	105	0.96	0.78	2	others	xxxxxxxxxxx	2021-11-23	Heart center	13	xxxxxx	88		81	5.07	56	35.9	6.1	1.4	0.6	2.84	1.82	0.31	0.07	0.03	4.98	150	0.452	90.8	30.1	332
xxxxxxx	26611	xxx	Han	man	80	170	85	29.4118	4.57	5.35	0.95	3.04	0.78	1.62	99.05	5.8	73	362			1.2	0.52	5	worker	xxxxxxxxxxx	2021-11-23	Heart center	26	xxxxxx	108	-	99	4.18	54.4	34.4	6.9	3.8	0.5	2.27	1.44	0.29	0.16	0.02	4.68	150	0.464	99.1	32.1	323
xxxxxxx	26970	xxx	Han	man	63	179	74	23.0954	5.15	5.6	1.52	4.32	0.93	3.23	433.45	3.61	65.14	278.14	125	86	0.95	0.93	5	retire	xxxxxxxxxxx	2021-11-23	Heart center	17	xxxxxx	80		74	6.39	55.4	34.1	6.9	2.5	1.1	3.54	2.18	0.44	0.16	0.07	4.67	151	0.47	99.6	32.3	325
xxxxxxx	26973	xxx	Han	man	52	174	71	23.4509	7.12	8.24	1.36	3.64	1.19	2.58	467.06	4.3	66.58	287.23	112	72	1.13	0.71	0	worker	xxxxxxxxxxx	2021-11-23	Heart center	50	xxxxxx	84		76	6.68	47.6	42.1	6.3	3.6	0.4	3.18	2.81	0.42	0.24	0.03	4.24	131	0.4	94.8	30.9	326
xxxxxxx	26981	xxx	Han	man	53	170	97	33.564	4.48	5.1	1.16	2.36	1.04	1.48	201.36	4.2	99	378.4	190	130	0.97	0.46	3	driver	xxxxxxxxxxx	2021-11-23	Heart center	45	xxxxxx	95		65	6.53	64.1	27.3	5.1	2.6	0.9	4.19	1.78	0.33	0.17	0.06	5.2	159	0.477	91.7	30.6	333
xxxxxxx	26946	xxx	Uygur	man	59	174	90	29.7265	4.5	5.2	1.52	2.74	0.67	1.67	69.88	6	75	303			0.95	0.59	5		xxxxxxxxxxx	2021-11-24	Heart center	35	xxxxxx			78	6.81	54.9	31	10.6	2.9	0.6	3.74	2.11	0.72	0.2	0.04	4.72	146	0.44	98.2	30.9	332
xxxxxxx	26972	xxx	Han	woman	58	150	47	20.8889	8.24	8.25	0.69	3.49	1.52	1.82	53.05	6	53	183			1.48	0.49	1	farmer	xxxxxxxxxxx	2021-11-24	Heart center	10	xxxxxx	65		76	5.24	67.8	24.6	6.1	1.1	0.4	3.55	1.29	0.32	0.06	0.02	4.08	125	0.38	93.9	30.6	326
xxxxxxx	28962	xxx	Han	man	56	174	77	25.4327	5.7	7.53	2.46	4.34	0.86	2.6	96.29	5.3	76	318	112	70	1.07	0.66	3		xxxxxxxxxxx	2021-11-24	Heart center	45	xxxxxx	75		78	9.22	70.2	21.6	6.1	1.7	0.4	6.47	1.99	0.56	0.16	0.04	4.87	144	0.442	90.8	29.6	326
xxxxxxx	26960	xxx	Han	man	55	167	63	22.5896	4.46	5.28	0.81	4.38	1.22	2.98	210.12	5.6	56	261	154	90	1.28	0.82	6	teacher	xxxxxxxxxxx	2021-11-24	Heart center	7	xxxxxx	80		80	4.54	69	20.7	7	3.1	0.2	3.13	0.94	0.32	0.14	0.01	4.71	125	0.404	85.8	26.5	309
xxxxxxx	26963	xxx	Han	man	63	172	68	22.9854	6.29	5.07	0.79	2.8	1.43	1.82	548.82	3.7	51.44	265.87	107	67	1.2	0.54	3	retire	xxxxxxxxxxx	2021-11-24	Heart center	55	xxxxxx	80		60	6.33	57.1	28.4	7.9	5.7	0.9	3.61	1.8	0.5	0.36	0.06	4.06	121	0.39	96.1	29.8	310
xxxxxxx	26952	xxx	Han	man	56	170	85	29.4118	5.8	7.6	1.35	3.04	0.85	1.75	126.16	5.8	66	311	113	78	1.06	0.54	2	worker	xxxxxxxxxxx	2021-11-24	Heart center	33	xxxxxx	88		68	9.67	59.9	30.8	7.1	1.9	0.3	5.79	2.98	0.69	0.18	0.03	4.82	154	0.461	95.6	32	334
xxxxxxx	26983	xxx	Han	man	60	177	83	26.493	4.59	5.47	2.1	4.42	1.06	2.59	864.79	5	73	355	116	69	1.34	0.96	5	retire	xxxxxxxxxxx	2021-11-25	Heart center	25	xxxxxx	78		67	4.88	58.9	35	5.3	0.6	0	2.87	1.71	0.26	0.04	0	4.95	154	0.477	96.4	31.1	323
xxxxxxx	26951	xxx	Han	man	75	170	75	25.9516	6.4	7.54	1.37	3.3	1.08	2.08	179.61	6	119	377.5	185	140	1.3	0.55	1	farmer	xxxxxxxxxxx	2021-11-25	Heart center	45	xxxxxx	72		68	7.12	78.3	15.2	4.5	7	1.3	5.57	1.08	0.32	0.05	0.09	4.62	143	0.42	91.1	31	340
xxxxxxx	26955	xxx	Han	woman	72	150	60	26.6667	8.55	7.06	3.35	4.07	0.99	2.45	456.21	3.4	70.06	326			1.3	0.72	1	retire	xxxxxxxxxxx	2021-11-25	Heart center	48	xxxxxx	79		87	9.79	61.2	27.6	7.3	3.5	0.4	5.99	2.7	0.71	0.34	0.04	4.59	140	0.44	96.3	30.5	317
xxxxxxx	26976	xxx	Uygur	man	57	173	81	27.0641	5.03	5.09	1.51	3.42	0.84	1.87	101.8	4.5	66	242.8			1.03	0.66	3	retire	xxxxxxxxxxx	2021-11-25	Heart center	7	xxxxxx	76		71	12.34	86.9	11.3	1.1	0.2	0.5	10.72	1.39	0.14	0.02	0.06	4.86	147	0.44	90.7	30.2	333
xxxxxxx	26985	xxx	Uygur	man	37	167	71	25.4581	4.6	5.01	0.74	2.57	0.77	1.37	63.48	5.1	75	193	120	70	0.93	0.45	3	farmer	xxxxxxxxxxx	2021-11-25	Heart center	28	xxxxxx	87		80	6.82	58.4	33.7	5.7	1.9	0.3	3.98	2.3	0.39	0.13	0.02	4.96	154	0.468	94.4	31	329
xxxxxxx	26971	xxx	Han	man	43	164	85	31.6032	4.17	4.95	1.86	4.38	0.86	2.84	30.08	3.7	63	353	142	102	1.06	0.88	5	office worker	xxxxxxxxxxx	2021-11-25	Heart center	22	xxxxxx	86		75	8.46	58.1	32.7	7.1	1.9	0.2	4.92	2.77	0.6	0.16	0.02	4.85	154	0.467	96.3	31.8	330
xxxxxxx	26966	xxx	Han	man	56	174	86	28.4053	5.31	5.6	2.33	6.51	1.2	4.68	579.07	24.1	177	861	180	140	1.59	1.39	6		xxxxxxxxxxx	2021-11-26	Heart center	34	xxxxxx	94		47	9.64	58.5	30.2	8.5	1.7	1.1	5.64	2.91	0.82	0.16	0.11	6.62	190	0.61	91.5	28.7	314
xxxxxxx	27002	xxx	Uygur	woman	70	158	80	32.0461	5.8	7.85	2.15	3.33	0.96	1.91	216.01	3.5	43	282			1.2	0.67	2	retire	xxxxxxxxxxx	2021-11-28	Heart center	1	xxxxxx	85		70	8.72	60.7	33.4	4.6	0.8	0.5	5.29	2.91	0.4	0.07	0.04	4.06	118	0.377	92.9	29.1	313
xxxxxxx	26990	xxx	Uygur	man	42	180	88	27.1605	4.45	5.13	1.06	4.84	0.94	3.47	105.9	4.8	74	348			1.12	1.01	5	staff	xxxxxxxxxxx	2021-11-28	Heart center	17	xxxxxx	88		100	8.53	57	33.2	6.9	2.7	0.2	4.86	2.83	0.59	0.23	0.02	4.82	151	0.456	94.6	31.3	331
xxxxxxx	27010	xxx	Han	woman	60	157	69	27.993	4.69	5.41	2.32	4.43	0.92	3.14	38	3.46	59.44	335.94	180	90	1.01	0.91	3	retire	xxxxxxxxxxx	2021-11-28	Heart center	10	xxxxxx	83		80	8.44	91.3	8	0.4	0.3	0	7.67	0.67	0.03	0.03	0	4.93	147	0.491	99.5	29.7	299
xxxxxxx	26995	xxx	Han	woman	60	155	64	26.6389	4.44	5.36	1.71	3.36	1.23	2.25	411.59	6.2	75	261.9	160	110	1.16	0.72	1	farmer	xxxxxxxxxxx	2021-11-28	Heart center	23	xxxxxx	86		70	5.32	60.3	28.6	5.6	4.9	0.6	3.21	1.52	0.3	0.26	0.03	4.15	131	0.417	100.5	31.6	314
xxxxxxx	26992	xxx	Han	man	73	177	80	25.5354	4.19	4.9	1.13	3.6	0.82	2.29	103.8	7.2	74	328			0.99	0.76	5	office worker	xxxxxxxxxxx	2021-11-28	Heart center	18	xxxxxx	87		63	5.31	60.8	31.6	5.5	1.7	0.4	3.23	1.68	0.29	0.09	0.02	4.94	142	0.449	9.09	28.7	316
xxxxxxx	29984	xxx	Han	man	68	168	62	21.9671	11.95	7.84	1.24	6.29	1.52	4.51	183.19	4.1	72	313.4	122	70	1.72	1.17	2	retire	xxxxxxxxxxx	2021-11-28	Heart center	13	xxxxxx	74		70	5.93	71.2	18.5	8.8	1.2	0.3	4.22	1.1	0.52	0.07	0.02	4.31	134	0.4	92.6	31	336
xxxxxxx	26999	xxx	Uygur	man	58	167	70	25.0995	6.63	8.66	1.19	4.47	1.06	3.02	699.86	4.7	65	374	118	69	1.12	0.97	5	retire	xxxxxxxxxxx	2021-11-28	Heart center	28	xxxxxx	82		69	6.82	51.9	37.8	6.5	3.7	0.1	3.54	2.58	0.44	0.25	0.01	4.67	134	0.404	86.5	28.7	332
xxxxxxx	27168	xxx	Han	woman	60	162	74.1	28.235	5.37	5.14	1.29	4.05	1.2	2.27	973.29	5.3	51	405	120	70	1.36	0.77	5	office worker	xxxxxxxxxxx	2021-11-29	Heart center	24	xxxxxx	103	A	72	4.315	0.6	44.3	6	3.9	0.2	1.97	1.91	0.26	0.17	0.01	4.81	151	0.456	94.8	31.4	331
xxxxxxx	27042	xxx	Han	man	48	169	80	28.0102	4.01	5.12	0.77	3.52	0.97	2.38	514.06	3.8	80	356			1.01	0.84	5		xxxxxxxxxxx	2021-11-29	Heart center	37	xxxxxx	90		85	6.66	61.7	30.2	6.2	1.4	0.5	4.11	2.01	0.41	0.09	0.03	5.31	153	0.489	92.1	28.8	313
xxxxxxx	27055	xxx	Han	woman	62	165	60	22.0386	4.45	5.73	0.61	3.64	1.45	2.11	174.46	3	61	247	120	70	1.32	0.67	1	retire	xxxxxxxxxxx	2021-11-30	Heart center	9	xxxxxx	95	A	75	4.335	3.8	7.4	1.1	0.2	2.5	1.47	0.32	0.05	0.01	3.51	3.51	111	0.341	97.2	31.6	326
xxxxxxx	26998	xxx	Han	man	84	160	66	25.7812	5.07	4.96	0.59	3.25	1.23	2.02	166.5	11.2	86	434.1			1.2	0.58	1	retire	xxxxxxxxxxx	2021-11-30	Heart center	24	xxxxxx				8.26	92.2	6.1	1.5	0.1	0.1	7.62	0.5	0.12	0.01	0.01	3.89	113	0.37	94.1	29	309
xxxxxxx	27085	xxx	Han	woman	78	155	55	22.8928	4.09	5.28	1.67	4.96	0.92	3.55	47.43	5.7	48	284	148	62	1.12	1.09	1	retire	xxxxxxxxxxx	2021-12-01	Heart center	10	xxxxxx	87	A	100	5.6	63.4	29.3	5.7	1.4	0.2	3.55	1.64	0.32	0.08	0.01	4.05	123	0.386	95.3	30.4	319
xxxxxxx	27107	xxx	Han	woman	61	156	59	24.2439	5.02	5.11	1.28	4.74	1.66	3.3	538.44	3.7	71	228.3	120	80	1.46	0.88	2	retire	xxxxxxxxxxx	2021-12-02	Heart center	32	xxxxxx	91	B	84
xxxxxxx	21821	xxx	Han	man	56	178	80	25.2493	3.01	5.44	0.74	3.14	1.17	1.88	44.6	4.8	73	244			1.23	0.7	6	civil servant	xxxxxxxxxxx	2021-12-06	Heart center	10	xxxxxx	32		70	4.25	49.4	34.4	1.5	4.2	0.5	2.1	1.46	0.49	0.18	0.02	4.32	129	0.385	89.1	29.9	335
xxxxxxx	27106	xxx	Uygur	man	53	193	130	34.9003	10.65	8.05	3.38	4.59	1.02	2.56	568.3	3.96	71.82	283.22	120	80	1.43	0.8	2	retire	xxxxxxxxxxx	2021-12-06	Heart center	25	xxxxxx			73	7	66.2	25.6	6.9	0.7	0.6	4.63	1.79	0.48	0.05	0.04	4.72	141	0.43	90	29.9	332
xxxxxxx	21825	xxx	Han	woman	64	160	59	23.0469	4.37	5.41	2.34	4.41	1	2.36	150	38.2	42.1	172.16			1.28	0.68	1	务	xxxxxxxxxxx	2021-12-07	Heart center	13	xxxxxx	26		72	3.71	45.5	46.6	6.5	1.1	0.3	1.69	1.73	0.24	0.04	0.01	4.6	128	0.387	84	27	331
xxxxxxx	27406	xxx	Han	man	75	170	75	25.9516	12.41	8.21	0.75	2.66	1.3	1.71	136	6.2	96	269.4	127	75	1.1	0.52	2	retire	xxxxxxxxxxx	2021-12-13	Heart center	16	xxxxxx		B	74	7.45	56	28.6	5.9	8.7	0.8	4.17	2.13	0.44	0.65	0.06	4.14	134	0.412	99.5	32.4	325
xxxxxxx	27290	xxx	Han	man	53	173	76	25.3934	9.64	7.11	1.6	4.78	1.36	3.33	284.8	5.13	77.34	329.79	112	64	1.34	0.85	5	not in detail	xxxxxxxxxxx	2021-12-13	Heart center	40	xxxxxx	85	B	74	9.63	66.2	24.7	6.1	2.5	0.5	6.38	2.38	0.59	0.24	0.05	4.81	154	0.463	96.3	32	333
xxxxxxx	27406	xxx	Han	man	75	163	74	27.852	12.41	8.21	0.75	2.66	1.3	1.71	136	6.2	96	269.4	127	75	1.1	0.52	2	retire	xxxxxxxxxxx	2021-12-13	Heart center	16	xxxxxx		B	74	7.45	56	28.6	5.9	8.7	0.8	4.17	2.13	0.44	0.65	0.06	4.14	134	0.412	99.5	32.4	325
xxxxxxx	27344	xxx	Han	man	54	163	61	22.9591	4.32	5.33	1.06	2.91	1.66	1.61	272.42	6.8	74	201.3	102	60	1.46	0.47	1	farmer	xxxxxxxxxxx	2021-12-14	Heart center	32	xxxxxx	78	A	63	3.33	51.4	38.1	8.7	1.5	0.3	1.71	1.27	0.29	0.05	0.01	4.15	124	0.391	94.2	29.9	317
xxxxxxx	27301	xxx	Han	woman	69	175	62	20.2449	5.1	4.86	0.92	3.55	0.99	2.53	629.17	10.7	106	441.4			1.12	0.53	1	farmer	xxxxxxxxxxx	2021-12-14	Heart center	9	xxxxxx	78	B	60
xxxxxxx	27351	xxx	Han	man	66	160	75	29.2969	4.71	5.14	2.99	3.89	0.73	2.32	53.55	3.9	87	4.3			1	0.81	4	retire	xxxxxxxxxxx	2021-12-14	Heart center	38	xxxxxx		B	83	8.05	51	36.6	9.1	1.9	1.4	4.11	2.95	0.73	0.15	0.11	4.92	157	0.46	93.7	31.9	341
xxxxxxx	27306	xxx	Han	man	77	178	88	27.7743	3.64	5.1	1.05	4.07	0.9	2.83	241.42	11.1	126	601			1.01	0.93	2	retire	xxxxxxxxxxx	2021-12-14	Heart center	24	xxxxxx	95	A	85	7.65	67.4	26.7	4.2	1.4	0.3	5.16	2.04	0.32	0.11	0.02	4.56	145	0.425	93.2	31.8	341
xxxxxxx	27308	xxx	Uygur	man	56	160	88	34.375	7.56	7.67	2.45	3.76	0.89	2.01	375.01	4.5	56	328			1.2	0.59	3	retire	xxxxxxxxxxx	2021-12-14	Heart center	17	xxxxxx	99	A	88	10.75	71.1	20.5	5.6	2.7	0.1	7.64	2.2	0.6	0.29	0.01	5.06	156	0.479	94.7	30.8	326
xxxxxxx	27298	xxx	Uygur	man	67	162	84	32.0073	4.99	4.89	2.44	3.49	0.84	2.4	632.04	5.26	73.61	311.03			1.06	0.77	5	retire	xxxxxxxxxxx	2021-12-14	Heart center	44	xxxxxx	107	B	75	5.15	46.6	42.7	9.7	0.6	0.4	2.4	2.2	0.5	0.03	0.02	4.95	148	0.443	89.5	29.9	334
xxxxxxx	27294	xxx	Uygur	woman	52	165	73	26.8136	17.2	7.57	1.01	4.28	1.36	3.1	481.1	4.3	73	288			1.53	0.81	1		xxxxxxxxxxx	2021-12-15	Heart center	21	xxxxxx	93	B	102	9.85	66.3	25.5	6.7	0.7	0.8	6.53	2.51	0.66	0.07	0.08	4.52	140	0.43	94.7	31	327
xxxxxxx	27311	xxx	Uygur	man	60	170	74	25.6055	4.21	5.26	1.16	2.62	1.03	1.73	147.04	8.6	81	184.4	175	95	0.94	0.49	5	cook	xxxxxxxxxxx	2021-12-15	Heart center	19	xxxxxx	78	A	69	5.29	63.5	26.1	8.9	0.4	1.1	3.36	1.38	0.47	0.02	0.06	4.85	145	0.423	87.2	29.9	343
xxxxxxx	27309	xxx	Han	woman	66	158	68	27.2392	4.36	5.12	2.01	4	1.34	2.06	784.19	4.7	69	328	102	70	1.52	0.74	5	retire	xxxxxxxxxxx	2021-12-15	Heart center	42	xxxxxx	89	B	74	3.93	50.8	41	6.4	1.8	0	2	1.61	0.25	0.07	0	4.28	137	0.424	99	32	323
xxxxxxx	27313	xxx	Han	man	51	184	85	25.1063	10.31	7.07	1.42	3.25	0.94	2.29	197	5	87	285			0.91	0.68	2	farmer	xxxxxxxxxxx	2021-12-15	Heart center	7	xxxxxx	83	A	85	9.1	94.8	3.9	0.6	0.7	0	8.63	0.35	0.05	0.06	0	5.08	153	0.517	101.7	30.1	296
xxxxxxx	27294	xxx	Uygur	woman	52	165	73	26.8136	17.2	7.57	1.01	4.28	1.36	3.1	481.1	4.3	73	288			1.53	0.81	1		xxxxxxxxxxx	2021-12-15	Heart center	21	xxxxxx	93	B	102	9.85	66.3	25.5	6.7	0.7	0.8	6.53	2.51	0.66	0.07	0.08	4.52	140	0.43	94.7	31	327
xxxxxxx	27299	xxx	Han	man	62	167	82	29.4023	4.77	5.11	0.61	2.95	1.01	1.74	112.19	8.5	69	285	141	91	1.17	0.62	4	retire	xxxxxxxxxxx	2021-12-15	Heart center	51	xxxxxx	92	B	94	9.33	53.6	39.2	4.8	2	0.4	5	3.66	0.45	0.19	0.04	4.06	123	0.38	93.6	30.3	324
xxxxxxx	27322	xxx	Uygur	man	70	178	80	25.2493	4.29	5.18	1.3	3.25	1	1.81	350.18	4.3	73	208			1.09	0.56	6	office worker	xxxxxxxxxxx	2021-12-15	Heart center	4	xxxxxx	91	B	66	7.88	71.9	18.1	8.8	0.9	0.3	5.67	1.43	0.69	0.07	0.02	3.83	112	0.35	91.4	29.2	320
xxxxxxx	27307	xxx	Han	man	47	169	70	24.5089	4.53	5.32	0.59	2.16	1.16	1.26	119.55	5.6	108	401	180	120	0.93	0.4	6	office worker	xxxxxxxxxxx	2021-12-16	Heart center	46	xxxxxx	85	B	57	5.52	51.3	37.1	6.5	4.9	0.2	2.83	2.05	0.36	0.27	0.01	4.42	138	0.424	95.9	31.2	325
xxxxxxx	27346	xxx	Han	woman	68	162	74	28.1969	7.34	8.03	3.01	5.21	1.25	3.65	341.91	6.7	69	325.7	185	100	1.11	1.09	0	not in detail	xxxxxxxxxxx	2021-12-17	Heart center	48	xxxxxx	85	B	60	6.87	57.3	35.7	4.8	1.6	0.6	3.94	2.45	0.33	0.11	0.04	4.93	146	0.434	88	29.6	336
xxxxxxx	22042	xxx	Uygur	man	51	179	93	29.0253	4.76	5.38	1.3	3.98	0.83	2.87	50.09	6.1	95	347	125	75	0.93	0.93	6	office worker	xxxxxxxxxxx	2021-12-17	Heart center	48	xxxxxx	89		72	9.25	51.1	40.9	6.3	1.5	0.2	4.73	3.78	0.58	0.14	0.02	4.99	165	0.478	95.8	33.1	265
xxxxxxx	27387	xxx	Han	man	61	177	100	31.9193	6.14	6.04	1.3	4.81	1.33	3.43	328.47	4.9	109	307.8	200	100	1.13	0.98	5	retire	xxxxxxxxxxx	2021-12-17	Heart center	31	xxxxxx	105	O	98	8.56	63	30.4	5.6	0.9	0.1	5.39	2.6	0.48	0.08	0.01	4.37	139	0.424	97	31.8	328
xxxxxxx	27345	xxx	Han	man	58	168	60	21.2585	3.92	5.48	1.1	3.22	1.48	2	324.66	7.4	107	321.5	101	60	1.25	0.59	2		xxxxxxxxxxx	2021-12-17	Heart center	50	xxxxxx	70	O	78	5.94	52	32.7	12.5	2	0.8	3.09	1.94	0.74	0.12	0.05	4.56	147	0.45	98.7	32.2	327
xxxxxxx	27381	xxx	Uygur	woman	66	170	78	26.9896	4.86	5.46	1.1	4.19	1.34	3.02	204.71	7.3	79	226.8	121	78	1.17	0.85	1	farmer	xxxxxxxxxxx	2021-12-18	Heart center	32	xxxxxx	92	O	78	5.57	54.7	35.7	5.7	3.4	0.5	3.05	1.99	0.32	0.19	0.03	4.62	136	0.42	91.1	29.4	323
xxxxxxx	27364	xxx	Uygur	man	56	175	86	28.0816	7.7	7.57	0.83	3.47	1.21	2.27	33	6.83	93.63	189.6	140	85	1.3	0.6	1		xxxxxxxxxxx	2021-12-19	Heart center	27	xxxxxx	98	A	76	6.01	54.3	30.8	11.1	3.5	0.3	3.26	1.85	0.67	0.21	0.02	5.38	166	0.494	91.8	30.9	330
xxxxxxx	27367	xxx	Uygur	woman	61	160	59	23.0469	5.86	5.25	2.42	3.28	0.78	1.91	171	4.68	50.07	280.59	128	72	1.06	0.65	3	worker	xxxxxxxxxxx	2021-12-19	Heart center	24	xxxxxx	82	B	86	8.4	55.3	36.2	6.1	2	0.4	4.65	3.04	0.51	0.17	0.03	4.51	127	0.4	87.8	28.2	321
xxxxxxx	27358	xxx	Han	woman	62	163	50	18.8189	4.57	5.6	1.02	5.23	1.16	3.8	218.5	5.4	46	260	119	52	1.39	0.03	3	retire	xxxxxxxxxxx	2021-12-19	Heart center	13	xxxxxx	72	O	85	6.02	46.7	44.4	6.8	1.3	0.8	2.81	2.67	0.41	0.08	0.05	4.43	125	0.392	88.5	28.2	319
xxxxxxx	27338	xxx	Han	man	56	175	90	29.3878	4.14	5.33	0.55	3.68	1	2.47	166.15	4	102	399	145	83	1.06	0.77	5	office worker	xxxxxxxxxxx	2021-12-19	Heart center	45	xxxxxx	91	B	77	5.03	66	28	4.6	1	0.4	3.23	1.41	0.23	0.05	0.02	5.01	54	0.45	89.6	30.7	343
xxxxxxx	27454	xxx	Han	man	54	181	88	26.8612	6.94	8.33	7.3	4.75	0.81	4.85	33.07	4.1	75	398	180	120	1.17	1.46	6	retire	xxxxxxxxxxx	2021-12-19	Heart center	9	xxxxxx	98	-	74	7.28	69.9	23.4	5.6	0.8	0.3	5.09	1.7	0.41	0.06	0.02	4.81	150	0.44	90.6	31.2	344
xxxxxxx	27376	xxx	Han	man	59	174	67	22.1297	3.72	7.9	0.8	2.52	1	1.69	209.62	5.4	88	216.5	170	110	1	0.5	4	civil servant	xxxxxxxxxxx	2021-12-19	Heart center	10	xxxxxx	85	O	76	5.94	52.2	40.6	5.7	1.5	0	3.1	2.41	0.34	0.09	0	4.75	151	0.457	96.2	31.8	330
xxxxxxx	27384	xxx	Han	man	74	168	68	24.093	4.86	5.11	0.97	3.96	1.44	2.47	55	8.42	65.5	306.92	171	80	1.68	0.71	1	farmer	xxxxxxxxxxx	2021-12-19	Heart center	6	xxxxxx	78	O	72	6.68	51.7	34.1	7.5	6.4	0.3	3.45	2.28	0.5	0.43	0.02	4.37	142	0.422	96.6	32.5	336
xxxxxxx	27361	xxx	Han	man	78	173	75	25.0593	2.08	4.65	1.45	3.61	0.93	2.26	225.37	4.2	334.7	10.91			1.19	0.56	1	retire	xxxxxxxxxxx	2021-12-19	Heart center	54	xxxxxx	83	A	61	7.4	52.7	40.1	60.2	0.5	0.5	3.9	2.97	0.46	0.04	0.04	4.95	155	0.4	93.5	31.3	335
xxxxxxx	27369	xxx	Han	man	56	170	68	23.5294	4.36	5.33	1.38	4.83	0.97	3.72	183	5.72	62.83	386.35	112	72	0.88	0.85	3	doctor	xxxxxxxxxxx	2021-12-19	Heart center	8	xxxxxx	89	B	65	6.03	54.7	31.8	7	6.3	0.2	3.3	1.92	0.42	0.38	0.01	4.81	149	0.444	92.3	31	336
xxxxxxx	27355	xxx	Uygur	man	46	175	87	28.4082	5.3	5.3	1.19	3.29	1.15	2.22	369.44	4.58	73.06	326.2	101	71	1.15	0.64	6	office worker	xxxxxxxxxxx	2021-12-19	Heart center	35	xxxxxx	95	B	70	6.85	57.6	27.6	11.2	3.2	0.4	3.95	1.89	0.77	0.22	0.03	4.73	142	0.429	90.7	30	331
xxxxxxx	27420	xxx	Han	woman	72	160	76	29.6875	4.63	5.16	1.11	3.13	0.84	2.32	181	5.45	83.16	292.03			1.3	0.63		retire	xxxxxxxxxxx	2021-12-20	Heart center	4	xxxxxx	99	0	71	5.33	56.4	31	10.9	1.3	0.4	3.01	1.65	0.58	0.07	0.02	4.52	135	0.43	95.6	29.9	313
xxxxxxx	27476	xxx	Uygur	man	46	170	77	26.6436	4.54	5.21	0.66	2.75	0.77	1.76	154.02	6.4	90	448	180	120	0.87	0.62	1	farmer	xxxxxxxxxxx	2021-12-20	Heart center	24	xxxxxx	83		83	8.21	62.9	27.9	4.5	4.6	0.1	5.16	2.29	0.37	0.38	0.01	4.91	140	0.432	88	28.5	324
xxxxxxx	27409	xxx	Han	woman	67	155	50.7	21.103	5.12	7.93	0.78	3.39	1.31	2.23	260.01	4.3	61	182.9	130	74	1.12	0.72	1	farmer	xxxxxxxxxxx	2021-12-20	Heart center	26	xxxxxx	78	0	98	6.32	53.8	38.3	4.9	2.4	0.6	3.4	2.42	0.31	0.15	0.04	3.92	115	0.366	93.4	29.3	314
xxxxxxx	27388	xxx	Uygur	man	32	168	80	28.3447	3.62	5.13	0.62	3.74	1.35	2.56	89	3.17	66.57	309.5	150	90	1.28	0.68	2		xxxxxxxxxxx	2021-12-20	Heart center	12	xxxxxx	95	O	87	5.03	53	37.6	7	2.2	0.2	2.67	1.89	0.35	0.11	0.01	5.49	153	0.498	90.7	27.9	307
xxxxxxx	22046	xxx	Uygur	man	51	167	87	31.1951	8.02	7.22	4.44	4.58	0.64	3.39	289.45	4.23	63.61	317.01	124	65	0.83	1.01	5	civil servant	xxxxxxxxxxx	2021-12-20	Heart center	24	xxxxxx	102		61	7.71	53.9	38.1	4.4	2.6	1	4.16	2.94	0.34	0.2	0.08	4.96	145	0.44	89.3	29.2	326
xxxxxxx	27371	xxx	Han	woman	69	168	73	25.8645	4.8	5.33	1.82	4.42	0.94	2.82	81.54	7.5	52	346	151	73	1.26	0.88	3	retire	xxxxxxxxxxx	2021-12-20	Heart center	10	xxxxxx	88	B	69	4.94	61.9	30.4	4.7	2.4	0.6	3.06	1.5	0.23	0.12	0.03	5.15	101	0.33	64.9	19.6	302
xxxxxxx	27405	xxx	Han	woman	74	151	49	21.4903	4.99	5.26	2.25	3.25	0.98	1.75	53.96	7.4	63	347			1.26	0.59	2	retire	xxxxxxxxxxx	2021-12-20	Heart center	38	xxxxxx	73	0	62	7.83	63	29.1	5.9	2	0	4.93	2.28	0.46	0.16	0	4.28	124	0.39	91.1	29	318
xxxxxxx	27377	xxx	Han	woman	67	160	62	24.2187	4.69	5.45	2.07	4.47	1.05	2.75	102	5	41	311	127	70	1.29	0.88	1	office worker	xxxxxxxxxxx	2021-12-20	Heart center	1	xxxxxx	82	O	74	4.45	61	31.2	6.5	0.9	0.4	2.71	1.39	0.29	0.04	0.02	4.14	122	0.398	96.1	29.5	307
xxxxxxx	27472	xxx	Han	woman	63	164	60	22.3081	4.87	5.5	1.22	4.38	1.11	3.1	232.81	6.1	78	214.6	125	59	1.02	0.95	3	retire	xxxxxxxxxxx	2021-12-20	Heart center	34	xxxxxx	83		58	6.68	58.6	33.7	6.1	1.5	0.1	3.91	2.25	0.41	0.1	0.01	4.11	118	0.372	90.5	28.7	317
xxxxxxx	27378	xxx	Han	man	79	173	69	23.0546	4.34	4.99	0.67	2.67	1.09	1.52	35.77	6.4	84	379	170	100	1.09	0.48	5	retire	xxxxxxxxxxx	2021-12-20	Heart center	20	xxxxxx	82	B	59	5.21	58.8	32.2	6.5	2.3	0.2	3.06	1.68	0.34	0.12	0.01	4.95	154	0.455	91.9	31.1	388
xxxxxxx	27391	xxx	Han	man	59	165	60	22.0386	5.25	5.19	1.98	4.2	1.27	2.58	122	5.49	76.71	284.96	180	120	1.47	0.74	1	farmer	xxxxxxxxxxx	2021-12-20	Heart center	24	xxxxxx	78	A	79	6.96	58	35.5	5	1.1	0.4	4.04	2.47	0.35	0.08	0.03	4.58	150	0.44	96.1	32.8	341
xxxxxxx	27433	xxx	Han	man	64	172	69	23.3234	5.1	6	1.02	3.55	1.22	2.06	775.28	3.4	65	251			1.35	0.76	5	retire	xxxxxxxxxxx	2021-12-20	Heart center	17	xxxxxx	93	B	68	6.49	52.2	33.1	7.7	6.2	0.8	3.39	2.14	0.5	0.4	0.05	4.25	128	0.397	93.4	30.1	322
xxxxxxx	27468	xxx	Uygur	man	51	180	70	21.6049	6.61	6	9.55	5.05	0.8	2.95	999.9	5.2	63	330.9	131	79	1.09	0.68	4		xxxxxxxxxxx	2021-12-20	Heart center	7	xxxxxx	67		89	6.94	49.4	35.3	11	3.6	0.7	3.43	2.45	0.76	0.25	0.05	5.06	161	0.48	95.3	31.8	334
xxxxxxx	27418	xxx	Uygur	man	57	173	83	27.7323	3.94	5.06	0.91	3.15	1.24	1.7	87.83	3.8	79	373			1.37	0.59	6	teacher	xxxxxxxxxxx	2021-12-21	Heart center	36	xxxxxx	92	0	70	5.86	56.5	28.2	9.9	5.1	0.3	3.31	1.65	0.58	0.3	0.02	4.7	148	0.452	96.2	31.5	327
xxxxxxx	27380	xxx	Uygur	woman	54	165	68	24.977	4.4	5.1	0.97	3.78	0.92	2.42	58.3	5.3	84	249	117	64	1.04	0.8	4	nurse	xxxxxxxxxxx	2021-12-21	Heart center	35	xxxxxx	92	B	88	5.61	48.7	42.4	7.5	1.2	0.2	2.73	2.38	0.42	0.07	0.01	4.47	127	0.396	88.6	28.4	321
xxxxxxx	27310	xxx	Han	woman	73	159	58	22.9421	4.55	5.77	1.19	3.03	1.02	1.82	859.45	4.4	63	314			1.05	0.59	2	retire	xxxxxxxxxxx	2021-12-21	Heart center	41	xxxxxx	83	0	70	9.7	72.3	20.2	7.1	0.3	0.1	7.01	0.96	0.69	0.03	0.01	4.1	129	0.4	97.3	31.4	322
xxxxxxx	27473	xxx	Han	woman	82	155	50	20.8117	6.09	5.67	1.12	4.55	1.48	3.37	205.13	4.8	82	371.9	140	71	1.21	0.96	1	retire	xxxxxxxxxxx	2021-12-21	Heart center	36	xxxxxx	67		74	6.55	54.4	35.6	6.9	2.9	0.2	3.56	2.33	0.45	0.19	0.01	4.06	128	0.385	94.8	31.5	332
xxxxxxx	27413	xxx	Han	man	52	164	73	27.1416	6.03	5.42	1.2	3.47	0.74	2.19	574.17	4.1	83	366	112	60	0.91	0.76	2	office worker	xxxxxxxxxxx	2021-12-21	Heart center	46	xxxxxx	98	0	76	7.86	51.1	37.4	7.4	3.7	0.4	4.02	2.94	0.58	0.29	0.03	4.62	147	0.457	98.9	31.8	322
xxxxxxx	27411	xxx	Han	man	55	175	73	23.8367	4.79	5.03	2.67	4.79	0.75	3.25	1426.3	3.21	76	431			0.94	1.16		retire	xxxxxxxxxxx	2021-12-21	Heart center	26	xxxxxx	87	B	74	8.5	91.4	7.6	0.7	0.3	0	7.77	0.65	0.06	0.03	0	5.88	166	0.56	94.4	28.2	299
xxxxxxx	27407	xxx	Uygur	man	56	180	75	23.1481	5.68	5.84	4.8	3.92	0.85	2.28	965.92	5.4	135.85	333.2			1.22	0.6		worker	xxxxxxxxxxx	2021-12-21	Heart center	31	xxxxxx	89	B	83	7.54	64.4	25.3	78	2.1	0.4	4.86	1.91	0.59	0.16	0.03	4.57	145	0.44	95.8	31.7	331
xxxxxxx	22045	xxx	Uygur	woman	50	157	87	35.2955	4.88	5.67	1.86	3.64	0.8	2.75	257.18	7.3	115	314	138	68	0.96	1.05	5	office worker	xxxxxxxxxxx	2021-12-22	Heart center	47	xxxxxx	90		65	12.07	57.8	32.9	6.6	1.8	0.9	6.98	3.97	0.8	0.22	0.11	5.16	140	0.438	84.9	27.1	320
xxxxxxx	27481	xxx	Han	man	67	164	65	24.1672	4.76	5.69	0.86	4.31	0.94	3.15	109.6	4.9	106	346	120	78	1.21	0.97	2	retire	xxxxxxxxxxx	2021-12-22	Heart center	45	xxxxxx	88	-	90	6.5	56.3	20.4	17.6	5.4	0.3	3.66	1.33	1.14	0.35	0.02	4.98	156	0.475	95.4	31.3	328
xxxxxxx	27414	xxx	Han	woman	56	158	60	24.0346	11.95	8.25	1.96	4.58	1.03	3.01	393.54	5.8	62	262			1.42	0.71	3	retire	xxxxxxxxxxx	2021-12-22	Heart center	39	xxxxxx	84	A	90	8.8	88.7	10.3	0.3	0.2	0.5	7.81	0.91	0.03	0.02	0.04	4.71	142	0.43	91.1	30.1	331
xxxxxxx	27430	xxx	Han	man	70	150	69	30.6667	5.03	5.56	0.95	3.55	1.04	2.32	303.85	8.1	94	455	108	65	1.04	0.79	2	retire	xxxxxxxxxxx	2021-12-22	Heart center	5	xxxxxx	83	A	64	6.56	61.1	22.6	9.6	6.1	0.6	4.01	1.48	0.63	0.4	0.04	4.69	144	0.42	90.2	30.7	340
xxxxxxx	27455	xxx	Han	man	53	166	70.8	25.6931	6.3	5.44	6.52	3.96	1.06	2.55	456.68	5.49	71.94	418	180	120	1.46	0.8	3		xxxxxxxxxxx	2021-12-23	Heart center	10	xxxxxx	8	-	81	8.88	65.5	22.4	5.9	5.6	0.6	5.82	1.99	0.52	0.5	0.05	4.62	146	0.42	90.9	31.6	348
xxxxxxx	27469	xxx	Han	man	64	174	83	27.4145	5.89	7.8	1.65	3.12	1.06	2.19	212.72	4.8	101	396.9	127	80	1.05	0.6	5	retire	xxxxxxxxxxx	2021-12-23	Heart center	11	xxxxxx	79		67	8.11	48.8	42	5.8	3.2	0.2	3.96	3.41	0.47	0.26	0.02	4.43	148	0.438	98.9	33.4	338
xxxxxxx	27424	xxx	Han	woman	77	164	74	27.5134	5.05	5.48	1.29	3.31	1.29	2.23	139.44	3.8	74	264.1			1.22	0.79	2	retire	xxxxxxxxxxx	2021-12-24	Heart center	30	xxxxxx	95	A	77	7.06	69.8	23.1	5.8	0.7	0.6	4.93	1.63	0.41	0.05	0.04	4.95	450	0.46	935	30.3	324
xxxxxxx	27500	xxx	Han	woman	71	165	71	26.079	5.06	5.28	1.56	4.83	1.01	3.45	147.7	7.3	78	209	180	100	1.27	1.05	1	retire	xxxxxxxxxxx	2021-12-26	Heart center	28	xxxxxx	89		90	5.4	51.1	41.1	6.3	1.1	0.4	2.76	2.22	0.34	0.06	0.02	3.82	128	0.386	101	33.5	332
xxxxxxx	27511	xxx	Han	woman	68	158	50	20.0288	5.14	5.11	1.32	4.57	1.28	3.52	165.32	4.87	65.57	272	160	92	1.07	0.93	0	not in detail	xxxxxxxxxxx	2021-12-26	Heart center	4	xxxxxx	74	-	52	7.66	54.4	38.1	5.4	1.4	0.7	4.17	2.92	0.41	0.11	0.05	4.56	134	0.42	91.4	29.4	321
xxxxxxx	27412	xxx	Han	woman	64	155	65	27.0552	5.96	5.12	2.07	3.09	1.07	2.15	461.89	4.9	82	284.2			1.03	0.7	3	retire	xxxxxxxxxxx	2021-12-26	Heart center	25	xxxxxx	93	A	75	7	64.4	29.2	4.3	1.2	0.9	4.51	2.04	0.3	0.08	0.06	5.1	144	0.42	82.4	28.3	344
xxxxxxx	27502	xxx	Han	man	64	165	62	22.7732	3.54	5.69	0.84	4.6	1.72	2.97	566.1	5	74	225	135	91	1.43	0.73	4	retire	xxxxxxxxxxx	2021-12-26	Heart center	35	xxxxxx	81		72	7.25	52.3	40.4	6.8	0.4	0.1	3.79	2.93	0.49	0.03	0.01	5.31	163	0.49	92.3	30.7	333
xxxxxxx	27505	xxx	Han	man	62	174	80	26.4236	5.94	5.42	0.88	4.32	1.37	3.42	146.22	3.64	63.15	300.33	160	92	1.17	0.94	2	farmer	xxxxxxxxxxx	2021-12-27	Heart center	14	xxxxxx	92	-	84	7.52	54.2	37.2	4.5	4	0.1	4.08	2.8	0.34	0.3	0.01	4.57	149	0.45	98.5	32.6	331
xxxxxxx	27477	xxx	Han	man	59	168	66	23.3844	5.52	5.48	3.2	3.02	0.96	2.11	307.41	4.2	86	440	120	80	1.38	0.59	4	farmer	xxxxxxxxxxx	2021-12-27	Heart center	14	xxxxxx	82	-	82	8.22	54	35.4	8	2.2	0.4	4.44	2.91	0.66	0.18	0.03	4.39	147	0.44	94.8	32	338
xxxxxxx	27514	xxx	Han	woman	64	150	45	20	7.84	7.3	1.73	4.59	1.49	3.11	791.48	2.8	62	165	165	82	1.82	0.75	1	farmer	xxxxxxxxxxx	2021-12-27	Heart center	39	xxxxxx	82	-	78	5.32	75.5	16.7	6.6	0.4	0.8	4.02	0.89	0.35	0.02	0.04	3.84	123	0.38	99	32	324
xxxxxxx	27539	xxx	Han	man	47	174	73	24.1115	4.26	5.28	2.32	3.04	0.8	1.57	189.06	6.7	91	461			1.13	0.66	2	farmer	xxxxxxxxxxx	2021-12-28	Heart center	38	xxxxxx	80		77	11.75	76.7	16.9	5.8	0.3	0.3	9.01	1.99	0.68	0.04	0.04	4.92	152	0.44	88.7	30.6	345
xxxxxxx	27577	xxx	Han	man	54	176	92	29.7004	6.04	5.22	1.91	2.81	0.8	2.01	0.54	3.7	63	424.9			1.23	1.23	6		xxxxxxxxxxx	2021-12-30	Heart center	41	xxxxxx	96		89	7.17	47	38.8	6.8	6.8	0.6	3.37	2.78	0.49	0.49	0.04	5	156	0.47	93	31.2	335
xxxxxxx	16503	xxx	Uygur	woman	55	159	62	24.5243	4.73	5.38	1.78	4.49	1.15	2.88	6.6	3.4	55	250			1.53	1.18			xxxxxxxxxxx	20191112	Heart center	4	xxxxxx		O		8.81	70.5	19.9	5.6	3.3	0.7	6.21	1.75	0.49	0.29	0.06	4.3	132	0.414	96.3	30.7	319
xxxxxxx	17420	xxx	Uygur	man	57	178	85	26.8274	15.17	7.62	1.57	5.53	0.83	3.9	96.51	4.76	61	340	135	78	1.07	1.24	Secondary specialized school	retire	xxxxxxxxxxx	20200103	Heart center	30	xxxxxx	79	AB	72	4.49	56.6	33	8	2.2		2.54	1.48	0.36	0.1	0.2	4.56	148	0.42	92.5	32.5	351
xxxxxxx	17427	xxx	Uygur	woman	57	150	46	20.4444	3.59	5.53	1.28	3.38	0.59	2.35	260	5.8	54	22.4	100	96	0.74	0.83	illiterate	farmer	xxxxxxxxxxx	20200103	Heart center	40	xxxxxx	69	A	54	8.3	53.8	35.1	6.9	1.8	0.4	4.47	2.91	0.74	0.15	0.03	2.83	82	0.261	92.2	29	3.4
xxxxxxx	17377	xxx	Han	woman	70	155	63	26.2227	2.28	5.8	1.51	3.99	1.27	2.26	72.8	6.4	81	256	189	90	1.45	0.79	middle school	retire	xxxxxxxxxxx	20200108	Heart center	30	xxxxxx	72	A	88	5.54	45.8	47.3	4.9	1.6	0.4	2.54	2.62	0.27	0.09	0.02	3.82	126	0.372	97.4	33	339
xxxxxxx	17366	xxx	Han	man	98	170	65	22.4913	4.57	5.65	1.16	2.26	0.9	1.06	60.61	4.2	0.9	29.6	98	65	0.93	0.45	middle school	farmer	xxxxxxxxxxx	20200109	Heart center	44	xxxxxx	76	B	68	3.93	54	37.4	6.4	2	0.2	3.2	2.22	0.38	0.12	0.01	5	141	0.42	84.4	28.2	334
xxxxxxx	17363	xxx	Han	woman	61	160	61	23.8281	3.61	5.75	1.22	4.42	1.22	2.8	487.85	3.9	55	290	149	77	1.33	1.29	illiterate	farmer	xxxxxxxxxxx	20200110	Heart center	39	xxxxxx	75	A	85	9.2	93	6	0.8	0.1	0.1	8.56	0.55	0.07	0.01	0.01	4.66	133	0.39	84.1	28.5	339
xxxxxxx	17424	xxx	Uygur	man	52	165	87	31.9559	5.77	6.29	7.22	3.63	0.57	1.9	40.44	5.72	67.4	401.4	180	120	0.86	0.89	Junior college	civil servant	xxxxxxxxxxx	20200113	Heart center	29	xxxxxx	74	B·	82	7.95	53	35	9.8	1.1	0.3	4.21	2.85	0.78	0.07	0.02	5.3	161	0.45	84	30.4	362
xxxxxxx	17412	xxx	Han	man	66	174	97	32.0386	4.78	5.53	1.51	3.56	1.2	2.05	82.49	4.5	73	252	153	133	1.37	0.66	Secondary specialized school	farmer	xxxxxxxxxxx	20200113	Heart center	28	xxxxxx	89	A	78	7.06	59.4	31.4	6.5	2.1	0.6	4.19	2.22	0.46	0.15	0.04	4.83	158	0.449	93	32.7	352
xxxxxxx	17428	xxx	Uygur	woman	44	160	61	23.8281	7.32	6.95	0.85	3.42	0.75	2.15	1437	3.03	48.94	157	120	70	0.81	0.62	illiterate	farmer	xxxxxxxxxxx	20200113	Heart center	20	xxxxxx	75	A·	80	4.34	59.7	27.4	12.2	0.7	0	2.59	1.19	0.53	0.03	0	4.71	11.1	0.36	76.9	23.6	307
xxxxxxx	17408	xxx	Uygur	man	72	173	71	23.7228	4.78	5.23	1.7	4.42	0.38	3.13	150.6	6	81	238.1	150	110	0.81	0.99	middle school	retire	xxxxxxxxxxx	20200114	Heart center	9	xxxxxx	79	AB	75	6.6	46.7	42.3	7	3.5	0.5	3.08	2.79	0.46	0.23	0.03	4.68	147	0.419	89.5	31.4	351
xxxxxxx	17418	xxx	Han	man	63	169	65	22.7583	4.92	5.04	0.98	3.93	1.27	2.51	209.8	6	79	351	93	60	1.24	0.76	middle school	retire	xxxxxxxxxxx	20200114	Heart center	22	xxxxxx	71	O	88	8.33	56.7	32.1	9.5	1.3	0.4	4.72	2.67	0.79	0.11	0.03	4.45	147	0.428	96.2	33	343
xxxxxxx	17448	xxx	Han	woman	82	151	64	28.0689	5.57	5.08	0.71	1.96	0.81	1.09		5.25	83.34	283	180	120			middle school	retire	xxxxxxxxxxx	20200116	Heart center	35	xxxxxx	78	B	79	5.71	45.8	49.4	2.5	2.1		2.62	2.82	0.14	0.12	0.01	3.83	118	0.36	93	30.8	331
xxxxxxx	22269	xxx	Uygur	man	72	162	70	26.6728	3.98	5.08	0.64	3.21	0.99	2.02	239.88	6	60	210	170	110	1.14	0.65	4	retire	xxxxxxxxxxx	20210108	Heart center	6	xxxxxx	86		67	5.73	58.8	28.3	89	4	0.2	3.36	1.62	0.51	0.23	0.07	3.56	94	0.299	84	26.4	34
xxxxxxx	7924	xxx	Uygur	woman	56	167	65	23.3067	14.59	7.87	6.03	4.49	0.59	1.86	56.2	3.77	39.7	303.2	185	110	0.86	0.96	Junior college	teacher	xxxxxxxxxxx	2016.06.09	Heart center	46	xxxxxx	103	B	80	5.67	52.7	37.6	6.5	2.8	0.4	2.99	2.13	0.37	0.16	0.02	5.08	143	0.42	82.9	28.1	340
xxxxxxx	4399	xxx	Uygur	man	44	165	100	36.7309	15.4	10.66	21.6	10.7	11.902	1.15	29.1	19.5	35	4.1	140	90	11.2	3.1	Secondary specialized school		xxxxxxxxxxx	2016.06.12	Heart center	31	xxxxxx			80	7.4	48.4	33.9	11	6.2	0.5	3.58	2.51	0.8	0.46	0.04	5.01	159	6.52	102.9	31.8	309
xxxxxxx	6249	xxx	Uygur	man	55	172	86	29.0698	4.18	10.58	33	15.8	14.81	1.33	30.4	7.98	45	3.8			12	5.31	Secondary specialized school	others	xxxxxxxxxxx	2016.06.13	Heart center	10	xxxxxx	103	B	68	10	67.8	20.4	9.6	1.7	0.5	6.78	2.04	0.96	0.11	0.05	4.43	134	0.39	88.7	30.3	342
xxxxxxx	8007	xxx	Uygur	man	48	175	94	30.6939	11	8.33	4.36	5.08	0.86	3.22	98	5.72	66.85	470.4	130	60	1.2	0.95	Junior college	doctor	xxxxxxxxxxx	2016.08.10	Heart center	39	xxxxxx	110	B	62	9.3	62	25.8	7.1	4.6	0.5	5.77	2.4	0.66	0.43	0.05	5.07	166	0.46	91	32.7	360
xxxxxxx	7980	xxx	Uygur	man	39	174	88	29.0659	7.32	7.9	5.92	3.51	0.95	1.82	38	6.14	83.38	351.15	140	70	1.12	0.58	Junior college	cadre	xxxxxxxxxxx	2016.08.11	Heart center	32	xxxxxx	96	B	81	7.6	56	32.6	8.9	2.1	0.4	4.26	2.48	0.68	0.16	0.03	4.47	146	0.42	93.1	32.7	352
xxxxxxx	9438	xxx	Uygur	man	56	175	70	22.8571	7.35	7.37	4.91	4.02	0.72	1.68	5	7.46	73.9	394.91			1.37	0.65	Secondary specialized school		xxxxxxxxxxx	2017.1.31	Heart center	1900116	xxxxxx	120		120	7.22	47.4	38.4	10.2	3.6	0.4	3.42	2.77	0.74	0.26	0.03	5.05	147	0.45	88.3	29.1	330
xxxxxxx	12204	xxx	Han	woman	60	163	72	27.0993	8.08	7.67	2.13	5.4	1.01	3.51	103.3	3.9	56	205	140	90	1.17	1.02	Secondary specialized school	family members工作	xxxxxxxxxxx	2017.10.20	Heart center	3	xxxxxx	83	AB	64	13.4	76	17.7	5.8	6.2	0.3	10.18	2.37	0.78	0.03	0.04	4.43	133	0.402	90.8	30	331
xxxxxxx	12199	xxx	Han	man	69	175	77	25.1429	5.72	4.65	1.04	4.89	0.92	3.49	457.8	3.5	63.15	399	150	95	1.07	0.99	middle school	retire	xxxxxxxxxxx	2017.10.23	Heart center	5	xxxxxx	87		66	6.38	53.6	35.9	9.7	0.5	0.3	3.42	2.29	0.62	0.03	0.02	4.41	133	0.4	90.5	30.2	333
xxxxxxx	12219	xxx	Han	woman	58	160	62	24.2187	4.53	5.04	1.86	5.19	1.15	3.92	184	3.68	44.6	247.7	90	70	1.83	1.14	Junior college	pharmacist	xxxxxxxxxxx	2017.10.24	Heart center	45	xxxxxx		O型	60	5.5	55.5	32.2	9.6	2	0.7	2.89	1.67	0.5	0.1	0.04	4.24	133	0.4	94.3	31.3	332
xxxxxxx	12214	xxx	Uygur	man	45	179	92	28.7132	7.86	7.34	5.11	3.95	0.93	1.46	235.23	5.52	63.74	229	150	100	1.26	0.63	undergraduate college		xxxxxxxxxxx	2017.10.28	Heart center	41	xxxxxx		A	72	7.38	51.3	38.1	9.1	1.2	0.3	3.79	2.81	0.67	0.09	0.02	4.63	143	0.41	88.8	30.9	348
xxxxxxx	12227	xxx	Uygur	man	50	175	92	30.0408	9.96	7.29	0.85	3.77	1.14	1.62	215.6	5.6	68.3	361.2	220	180	1.74	0.66	Secondary specialized school	farmer	xxxxxxxxxxx	2017.10.29	Heart center	34	xxxxxx		O型	70	7.7	58.5	32	7.6	1.5	0.4	4.5	2.46	0.59	0.12	0.03	4.53	144	0.472	94	31.9	339
xxxxxxx	12217	xxx	Han	man	65	166	60	21.7738	6.36	5.17	0.73	2.77	0.82	1.3	164.42	5.52	88.7	418.9	199	108	1.41	0.57	middle school	retire	xxxxxxxxxxx	2017.10.29	Heart center	37	xxxxxx		B	88	6.02	65.6	20.9	12.6	0.7	0.2	3.95	1.26	0.76	0.04	0.01	4.74	151	0.44	92.4	31.9	345
xxxxxxx	12232	xxx	Uygur	man	39	174	76	25.1024	4.49	5.23	1.84	4.28	1.12	2.88	128.8	7.2	48	272	130	80	1.11	0.92	Secondary specialized school	farmer	xxxxxxxxxxx	2017.10.30	Heart center	39	xxxxxx		B	72	6.3	57.6	32	8.9	1.2	0.3	3.63	2.02	0.56	0.08	0.02	5	154	0.459	91.5	30.7	335
xxxxxxx	12229	xxx	Han	man	70	168	58	20.5499	7.19	8.16	1.01	3.99	2.07	2.17	89.9	5.1	70	166	165	95	1.26	0.7	middle school	retire	xxxxxxxxxxx	2017.10.30	Heart center	29	xxxxxx		A	84	5.4	68.5	21.7	9.3	0.5	0	3.7	1.17	0.5	0.03	0	4.19	132	0.391	93.2	31.6	339
xxxxxxx	12233	xxx	Uygur	man	62	172	70	23.6614	3.64	4.85	1.11	4.41	1.47	2.83	52.9	5.6	69	260	180	90	1.96	0.87	Secondary specialized school	farmer	xxxxxxxxxxx	2017.10.30	Heart center	1	xxxxxx	97	A	80	5.23	60	31.7	7.5	0.4	0.4	3.14	1.66	0.39	0.02	0.02	4.82	138	0.41	85.9	28.6	333
xxxxxxx	12218	xxx	Uygur	man	61	172	94	31.7739	4.79	5.17	2.37	5.08	1.63	3.1	179.1	5.2	73	385	110	80	1.35	1.06	Secondary specialized school	retire	xxxxxxxxxxx	2017.10.30	Heart center	28	xxxxxx		A	70	7.9	67.2	22.5	8.1	2.2	0	5.31	1.78	0.64	0.17	0	4.47	144	0.423	94.6	32.2	340
xxxxxxx	12224	xxx	Uygur	woman	73	159	56	22.151	4.08	5.26	1.89	3.42	0.92	2.07	131.1	5.9	81	392.6	190	90	1.14	0.86	Secondary specialized school	retire	xxxxxxxxxxx	2017.10.31	Heart center	37	xxxxxx		O型	71	7.7	66.7	27.5	4.6	1.2	0	5.14	2.12	0.35	0.09	0	4.53	135	0.404	89.1	29.8	335
xxxxxxx	12231	xxx	Han	woman	60	160	60	23.4375	4.1	5.26	0.7	4.96	1.8	2.88	144.6	5.6	45	300	170	100	1.04	0.88	middle school	office worker	xxxxxxxxxxx	2017.10.31	Heart center	33	xxxxxx		A	64	6.4	44.9	45.7	7.9	1.2	0.3	2.87	2.92	0.51	0.08	0.02	3.67	112	0.341	93.1	30.5	321
xxxxxxx	12248	xxx	Uygur	man	59	164	64	23.7954	3.92	5.14	1.19	4.21	1.08	2.55	182.7	6.9	67	353	110	70	1.01	0.76	Secondary specialized school		xxxxxxxxxxx	2017.10.31	Heart center	17	xxxxxx			82	4.4	50.2	37.8	10.1	1.8	0.1	2.21	1.66	0.44	0.08	0	4.2	131	0.399	95	31.1	327
xxxxxxx	12243	xxx	Uygur	man	66	162	62	23.6244	4.5	5.21	3.08	4.97	0.93	3.01	224.2		103	520.9	140	90	1.08	1.12	Secondary specialized school	worker	xxxxxxxxxxx	2017.10.31	Heart center	22	xxxxxx			89	7	44.2	45	6.9	2.9	1	3.09	3.15	0.48	0.2	0.03	5.01	159	0.47	93.8	29.7	317
xxxxxxx	12250	xxx	Uygur	woman	59	160	69	26.9531	6.46	10.3	3.3	3.84	0.49	1.86	204.5	5.6	50	277	200	100	0.87	0.83	middle school	worker	xxxxxxxxxxx	2017.11.1	Heart center	9	xxxxxx			62	7.5	70.3	22.6	5.5	1.6	0	5.27	1.7	0.41	0.21	0	4.34	139	0.408	93.9	31.9	340
xxxxxxx	12527	xxx	Uygur	woman	54	160	68	26.5625	15.26	7.42	3.08	5.59	0.81	3.52	307.55	4.71	42.5	297.8	200	105	1.35	1.17	middle school	farmer	xxxxxxxxxxx	2017.11.12	Heart center	19	xxxxxx			81	5.22	55.4	31.2	8.4	4.4	0.6	2.89	1.67	0.44	0.23	0.03	3.65	99	0.33	90.4	27.1	300
xxxxxxx	12526	xxx	Uygur	woman	61	153	95	40.5827	7.258	7.47	1.67	6.04	0.9	4.55	63.7	3.8	49	282			0.99	1.51	Secondary specialized school	family members	xxxxxxxxxxx	2017.11.14	Heart center	27	xxxxxx		A	82	7.85	62.4	32	3.6	1.9	0.1	4.9	2.51	0.28	0.15	0.01	3.94	117	0.35	89.8	29.7	331
xxxxxxx	12555	xxx	Uygur	man	36	181	97	29.6084	6.32	4.33	0.99	3.48	0.78	2.22	106.1	6.14	77.3	410.7	100	60	0.91	0.68	Junior college	office worker	xxxxxxxxxxx	2017.11.15	Heart center	3	xxxxxx			72	4.15	52.4	34.2	10.1	3.1	0.2	2.17	1.42	0.42	0.13	0.01	4.68	141	0.43	91.5	30.1	329
xxxxxxx	12520	xxx	Uygur	man	62	168	92	32.5964	4.78	5.08	1.07	4	0.82	2.71	147.2	6.1	68	208	180	110	0.98	0.67	Secondary specialized school	farmer	xxxxxxxxxxx	2017.11.19	Heart center	30	xxxxxx		AB	76	7.6	57.1	31.5	8	2.7	0.7	4.34	2.39	0.61	0.21	0.05	4.56	143	0.43	94.3	31.4	333
xxxxxxx	12539	xxx	Han	woman	69	160	61.5	24.0234	6.74	5.19	3.41	5.13	0.86	2.37	526.64	5.05	60.6	290.3			1.86	1.41	illiterate		xxxxxxxxxxx	2017.11.20	Heart center	5	xxxxxx		B	64	5.38	57.9	30.9	4.3	6.3	0.6	3.12	1.66	0.23	0.34	0.03	3.9	114	0.35	90.8	29.2	322
xxxxxxx	12503	xxx	Uygur	man	74	174	93	30.7174	24.34	8.11	1.33	4.26	0.68	2.82	417.47	6.36	84.3	256.2	190	100	1.4	1.11	Secondary specialized school	retire	xxxxxxxxxxx	2017.11.20	Heart center	18	xxxxxx			80	7.05	65.8	25	7.2	1.6	0.4	4.64	1.76	0.51	0.11	0.03	4.58	135	0.41	88.4	29.5	333
xxxxxxx	12540	xxx	Uygur	man	55	158	70	28.0404	7.93	6.7	1.9	3.37	1.05	1.49	345.5	4.01	74.72	270			1.37	0.67	middle school	not in detail	xxxxxxxxxxx	2017.11.21	Heart center	32	xxxxxx			72	8.2	70.4	19.8	8	1.5	0.3	5.77	1.67	0.66	0.12	0.02	4.96	156	0.467	94.3	31.5	335
[truncated: 605 more rows]
[truncated: 31 more columns]
